# Supplementary material for: Review article: Review of fragility analyses for major building types in China with new implications for intensity–PGA relation development
Source: Copernicus journal article supplement (doi:10.5194/nhess-20-643-2020), 2020-02-27
Supplement: Supplementary file 1 [file EQ_list_with_field_survey.xlsx]

## Sheet: EQ_with_field_survey
Location name	Year	Month	Day	Hour	Minute	Second	Latitude	Longitude	Magnitude	Depth	Location name in Chinese	Note: *** this catalogue is compilied by Danhua Xin based on the catalog in Ding (2016, Appendix 2) and Xu et al. (2014, through personal request) ***
Liaoning, Haicheng	1975	2	4	19	36	4	40.7	122.7	7.3	16	辽宁海城地震
Hebei, Tangshan	1976	7	28	3	42	53	39.63	118.18	7.8	11	河北唐山地震
Sichuan, Dege	1993	5	24	7	57	44	31.78	98.8	4.7	15	四川德格地震
Sichuan, Jinggu-Lincang-Shuangjiang	1993	6	3	9	15	36	23.42	100.12	4.8	10	云南景谷-临沧-双江震群
Sichuan, Muchuan	1993	8	7	16	36	6	29.02	103.6	4.7	5	四川沐川地震
Xinjiang, Kashi	1993	12	1	4	37	11	39.32	75.63	5.9	39	新疆喀什地震
Xizang, Lazi-Angren	1993	3	20	22	52	1	29.4	87.2	6.4	25	西藏拉孜-昂仁地震
Yunnan, Pu'er	1993	1	27	4	32	3	23.1	101.1	6.2	31	云南普洱地震
Yunnan, Yao'an	1993	8	14	22	30	0	25.45	101.25	5.3	33	云南姚安地震
Yunnan, Zhongdian	1993	7	17	17	46	35	27.9	99.6	5.6	12	云南中甸地震
Qinghai, Gonghe	1994	2	16	5	9	42	36.3	100.18	5.7	24	青海共和地震
Qinghai, Gonghe-Xinghai	1994	10	10	22	7	0	36	100.27	5.2	22	青海共和-兴海地震
Qinghai, Gonghe-Xinghai	1994	1	3	13	52	31	36.07	100.15	6	28	青海共和-兴海地震
Sichuan, Jiangyou	1994	2	25	15	42	13	31.72	104.7	4.7	15	四川江油地震
Sichuan, Muchuan	1994	12	30	2	58	0	29.02	103.65	5.6	13	四川沐川地震
Yunnan, Jinggu	1994	9	19	23	28	0	23.6	100.32	5	15	云南景谷地震
Gansu, Yongdeng	1995	7	22	6	44	0	36.37	103.25	5.9	8	甘肃永登地震
Sichuan, Muchuan	1995	4	26	11	46	0	28.98	103.65	4.9	32	四川沐川地震
Xinjiang, Jimunai	1995	5	29	5	46	0	47.77	85.45	4.9	25	新疆吉木乃地震
Yuannan, Cangyuan-Lancang	1995	2	18	8	14	0	22.98	99.68	5.1	31	云南沧源-澜沧地震
Yunnan, Jinping	1995	4	25	0	13	0	22.77	102.73	5.5	31	云南金平地震
Yunnan, Menglian	1995	7	12	5	46	0	21.98	99.07	7.3	13	云南孟连西中缅交界地震
Yunnan, Wuding	1995	10	24	6	46	0	25.83	102.32	6.6	15	云南武定地震
Gansu, Tianzhu-Gulang	1996	6	1	20	49	0	37.28	102.75	5.4	5	甘肃天祝-古浪地震
Neimenggu, Baotou	1996	5	3	11	32	0	40.78	109.68	6.4	23	内蒙古包头西地震
Sichuan, Baiyu-Batang	1996	12	21	16	39	0	30.6	99.42	5.6	5	四川白玉-巴塘地震
Sichuan, Yibin	1996	2	28	19	21	0	29.03	104.63	5.5	0	四川宜宾地震
Xinjiang, Jiashi-Atushi	1996	3	19	23	0	0	40.13	76.63	6.8	28	新疆伽师-阿图什地震
Yunnan, Lijiang	1996	7	2	15	5	0	26.93	100.1	5.1	10	云南丽江地震
Yunnan, Lijiang	1996	9	25	3	24	0	27.2	100.32	5.7	15	云南丽江地震
Yunnan, Lijiang	1996	2	3	19	14	0	27.3	100.22	6.9	10	云南丽江地震
Chongqing, Rongchang	1997	8	13	16	13	0	29.5	105.48	4.9	17	重庆荣昌地震
Fujian, Yong'an	1997	5	31	14	51	0	25.58	117.18	5.1	6	福建永安西南地震
Xinjiang, Qieshi	1997	3	1	14	4	0	39.57	76.96	5.8	17	新疆伽师地震
Xinjiang, Qieshi	1997	1	21	9	48	0	39.65	76.94	6.3	38	新疆伽师地震
Xinjiang, Qieshi	1997	4	11	13	34	43	39.6	76.97	6.5	29	新疆伽师地震
Yunnan, Jinghong-Jiangcheng	1997	1	30	17	59	0	22.41	101.4	5.4	5	云南景洪-江城地震
Yunnan, Lijiang	1997	10	23	20	28	0	26.88	100.3	5.3	10	云南丽江地震
Yunnan, Mengla-Jinghong	1997	1	25	10	38	0	21.87	101.09	5	26	云南勐腊-景洪地震
Hebei, Zhangbei	1998	1	10	11	50	0	41.1	114.31	6.3	10	河北张北地震
Xinjiang, Aheqi	1998	9	18	11	53	11	40.99	78.47	4.8	17	新疆阿合奇地震
Xinjiang, Atushi	1998	3	19	21	51	0	40.12	76.79	5.7	19	新疆阿图什地震
Xinjiang, Baicheng	1998	7	28	12	51	0	41.74	81.54	5.4	15	新疆拜城地震
Xinjiang, Pishan	1998	5	29	5	11	43	37.57	79.04	6	36	新疆皮山地震
Yunna, Xuanwei	1998	12	1	15	37	53	26.32	104.09	4.9	9	云南宣威地震
Yunnan, Chengjiang	1998	11	25	10	37	43	47.6	89.57	4.7	21	云南澄江地震
Yunnan, Ninglang	1998	10	2	20	49	29	27.3	101.1	5.3	12	云南宁蒗地震
Yunnan, Ninglang	1998	11	19	19	38	11	27.24	100.99	6.1	33	云南宁蒗地震
Chongqing, Rongchang	1999	8	17	0	0	0	29.45	105.48	5	10	重庆荣昌地震
Hebei, Zhangbei	1999	3	11	21	18	1	41.16	114.39	5.6	17	河北张北地震
Liaoning, Haicheng-Xiuyan	1999	11	29	12	10	39	40.54	123.04	5.9	10	辽宁海城-岫岩地震
Neimenggu, Xilinhaote	1999	1	29	13	44	21	44.67	115.75	5.2	18	内蒙古锡林浩特地震
Qinghai, Maqin	1999	11	26	4	51	15	34.52	99.87	4.7	23	青海玛沁地震
Sichuan, Mianzhu-Hanwang	1999	9	14	20	54	31	31.6	104.09	4.8	22	四川绵竹汉旺地震
Sichuan, Mianzhu-Qingping	1999	11	30	16	24	52	31.44	104.34	4.7	1	四川绵竹清平地震
Xinjiang, Kuche	1999	3	15	18	42	55	41.81	82.69	5.5	35	新疆库车地震
Gansu, Jingtai	2000	6	6	18	59	10	37.14	103.92	5.9	1	甘肃景泰地震
Qinghai, Xinghai	2000	9	12	8	27	54	35.57	99.62	6.7	12	青海兴海地震
Qinghai, Zaduo	2000	4	15	17	32	38	33.24	95.47	5.3	32	青海杂多地震
Yunnan, Longchuan	2000	10	6	20	5	35	24.39	97.54	5.7	24	云南陇川西中缅边境地震
Yunnan, Qiubei-Mile	2000	1	27	4	55	16	24.15	103.64	5.4	10	云南丘北-弥勒地震
Yunnan, Wuding	2000	8	21	21	25	39	25.82	102.22	4.9	8	云南武定地震
Yunnan, Yao'an	2000	1	15	7	37	5	25.59	101.12	6.4	30	云南姚安地震
Chongqing, Rongchang	2001	6	23	10	48	3	29.45	105.48	4.7	11	重庆荣昌地震
Gansu, Sunan	2001	7	11	5	41	4	39.03	97.9	5.4	4	甘肃肃南地震
Sichuan, Yajiang-Kangding	2001	2	23	8	9	20	29.42	101.1	6	6	四川雅江-康定地震
Sichuan, Yanyuan	2001	5	24	5	10	39	27.6	100.9	5.8	5	四川盐源地震
Yunnan, Chuxiong	2001	7	10	7	51	32	24.93	101.38	5.3	13	云南楚雄地震
Yunnan, Jiangchuan	2001	7	15	2	36	5	24.33	102.63	5	26	云南江川地震
Yunnan, Lancang	2001	3	12	16	57	49	22.3	99.82	5.3	25	云南澜沧地震
Yunnan, Shidian	2001	4	10	11	13	7	24.8	99.02	5.1	10	云南施甸地震
Yunnan, Yongsheng	2001	10	27	13	35	40	26.23	100.57	6.1	15	云南永胜地震
YunnanNinglang-SichuanYanyuan	2001	5	24	5	10	40	27.63	100.8	6	5	云南宁蒗-四川盐源地震
Gansu, Yumen	2002	12	14	21	27	29	39.82	97.33	5.9	22	甘肃玉门地震
Neimenggu, Xiwuzhumaqin	2002	10	20	23	46	10	44.68	117.33	4.9	5	内蒙古锡林郭勒盟西乌珠穆玛沁旗地震
Sichuan, Renshou-Shuangliu	2002	5	31	11	53	1	30.27	104.17	4.6	10	四川仁寿-双流地震
Sichuan, Xinlong	2002	8	8	19	42	0	30.87	100.02	5.4	29	四川新龙地震
Xinjiang, Wuqia	2002	12	25	20	57	3	39.58	75.05	5.8	27	新疆乌恰地震
Gansu, Minyue-Shandan	2003	10	25	20	47	60	38.32	100.97	5.8	10	甘肃民乐-山丹地震
Gansu, Minyue-Shandan	2003	10	25	20	41	36	38.35	100.93	6.1	13	甘肃民乐-山丹地震
Neimenggu, Balinzuo-Alukeqin	2003	8	16	18	58	42	43.92	119.87	5.6	20	内蒙古巴林左旗-阿鲁科沁旗地震
Qinghai, Delingha	2003	4	17	8	48	33	37.65	96.57	6.6	15	青海德令哈地震
Sichuan, Xichang-Zhaojue	2003	7	11	9	33	57	27.78	102.43	4.8	10	四川西昌-昭觉县地震
Sichuan, Yanyuan	2003	8	21	10	17	49	27.42	101.27	4.9	5	四川盐源地震
Xinjiang, Bachu-Qieshi	2003	2	24	10	3	42	39.62	77.27	6.6	27	新疆巴楚-伽师地震
Xinjiang, Qieshi	2003	5	4	23	44	36	39.4	77.17	5.8	28	新疆伽师地震
Xinjiang, Zhaosu	2003	12	1	9	38	31	42.98	80.47	6.1	21	新疆昭苏地震
Yunnan, Dayao	2003	10	16	20	28	4	25.92	101.3	5.9	5	云南大姚地震
Yunnan, Dayao	2003	7	21	23	16	30	25.95	101.23	6.3	6	云南大姚地震
Yunnan, Ludian	2003	11	26	21	38	55	27.2	103.63	5	13	云南鲁甸地震
Yunnan, Ludian	2003	11	15	2	49	43	27.17	103.62	5.4	24	云南鲁甸地震
Gansu, Minxian-Zhuoni	2004	9	7	20	15	50	34.73	103.92	5	19	甘肃岷县-卓尼地震
Neimenggu, Dongwuzhumaqin	2004	3	24	9	53	49	45.38	118.25	5.6	18	内蒙古锡林郭勒盟东乌珠穆玛沁旗地震
Yunnan, Ludian	2004	8	10	18	26	13	27.17	103.6	5.5	6	云南鲁甸地震
Yunnan, Shuangbai	2004	12	26	15	30	9	24.7	101.53	5	7	云南双柏地震
Heilongjiang, Lindian	2005	7	25	23	43	34	46.98	125.05	5.3	5	大庆林甸地震
Xinjiang, Moyu	2005	8	26	5	8	1	37.13	79.4	5.4	42	新疆墨玉县地震
Yunnan, Simao	2005	1	26	0	30	36	22.63	100.72	5.2	5	云南思茅地震
Yunnan, Wenshan	2005	8	13	12	58	4	23.62	104.07	5.2	3	云南文山地震
Fujian, Shunchang	2007	3	13	10	22	0	26.72	117.73	4.9	10	福建顺昌地震
Yunnan, Ning'er	2007	6	3	5	34	57	23.05	101.02	6.7	5	云南宁洱地震
Sichuan, Panzhihua	2008	8	30	16	30	52	26.28	101.92	6.3	19	四川攀枝花地震
Sichuan, Wenchuan	2008	5	12	14	28	0	31	103.4	8.2	14	四川汶川地震
Yunnan, Yao'an	2009	7	9	19	19	14	25.6	101.03	6.3	6	云南姚安地震
Qinghai, Yushu	2010	4	14	7	49	36	33.22	96.59	7.3	14	青海玉树地震
Xinjiang, Nileke-Gongliu	2011	11	1	8	21	27	43.6	82.45	5.8	28	新疆尼勒克巩留交界
Xinjiang, Heshuo	2012	1	8	14	20	5	42.1	87.5	5	7	新疆和硕地震
Gansu, Minxian-Zhangxian	2013	7	22	7	45	56	34.54	104.21	6.7	15	甘肃岷县漳县地震
Sichuan, Lushan	2013	4	20	8	2	47	30.3	102.99	7	17	四川芦山地震
Sichuan, Kangding	2014	11	22	16	55	28	30.29	101.68	6.4	20	四川康定地震
Xinjiang, Yutian	2014	2	12	17	19	48	36.14	82.51	7.3	10	新疆玉田地震
Yunnan, Ludian	2014	8	3	16	30	12	27.11	103.33	6.6	10	云南鲁甸地震
