# Supplementary material for: Review article: Review of fragility analyses for major building types in China with new implications for intensity–PGA relation development
Source: Copernicus journal article supplement (doi:10.5194/nhess-20-643-2020), 2020-02-27
Supplement: Supplementary file 1 [file nhess-20-643-2020-supplement.zip]

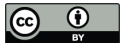

## *Supplement of*

# **Review article: Review of fragility analyses for major building types in China with new implications for intensity–PGA relation development**

**Danhua Xin et al.**

*Correspondence to:* Danhua Xin ([danhua.xin@kit.edu](mailto:danhua.xin@kit.edu))

- [nhess-20-643-2020-supplement-title-page.pdf](#)
- [supplements\\_20190528](#)
  - [EQ\\_list\\_with\\_field\\_survey.xlsx](#)
  - [Supplementary\\_building\\_classification\\_details.pdf](#)
  - [\[step1\]China\\_fragility\\_literature\\_review.xlsx](#)
  - [\[step2\]China\\_fragility\\_discrete\\_records.xlsx](#)
  - [\[step3\]China\\_fragility\\_classification.xlsx](#)
  - [\[step4\]China\\_fragility\\_output\\_database.xlsx](#)
  - [data\\_Fig3-4](#)
    - \* [Masonry\\_A\\_PGA\(g\)\\_fragility.txt](#)
    - \* [Masonry\\_B\\_PGA\(g\)\\_fragility.txt](#)
    - \* [RC\\_A\\_Intensity\\_fragility.txt](#)
    - \* [RC\\_A\\_PGA\(g\)\\_fragility.txt](#)
    - \* [RC\\_B\\_Intensity\\_fragility.txt](#)
    - \* [RC\\_B\\_PGA\(g\)\\_fragility.txt](#)
    - \* [masonry\\_A\\_Intensity\\_fragility.txt](#)
    - \* [masonry\\_B\\_Intensity\\_fragility.txt](#)

The copyright of individual parts of the supplement might differ from the CC BY 4.0 License.
