# Supplementary material for: Review article: Review of fragility analyses for major building types in China with new implications for intensity–PGA relation development
Source: Copernicus journal article supplement (doi:10.5194/nhess-20-643-2020), 2020-02-27
Supplement: Supplementary file 3 [file [step1]China_fragility_literature_review.xlsx]

## Sheet: site survey and statistic 36 
Model No.	Year	Authors	EQ location	EQ details	building type	analysis method		notes	References
1	2011	Zhou Guangquan et al.	Yunnan, Yingjiang County	2011.03.10 Ms5.8; 24.7°N, 97.9°E; depth: 10km Maximum intensity: VIII	soil-wood, brick-wood, brick-concrete, steel frame	site survey		basically the maximum intensity caused by Mag<6 EQ is VII. But this EQ has resulted VIII-level damage	Discussion of the intenisty VIII of the Ms5.8 Yingjiang Earthquake on Mar.10, 2011 (in Chinese) 2011年3月10日盈江5.8级地震VIII度区烈度评定探讨
damage ratio (%)	sturcture type	collapse	serious damage	medium damge	slight damge	no damage
VIII	soil-wood	0.3033	0.6695			0.0272	8
	brick-wood	0.3534	0.6207			0.0259	8
	steel frame	0	0.1863	0.2516	0.3168	0.2453	8
	brick-concrete	0.0201	0.0844	0.3868	0.3418	0.1669	8
2	2012	Chang Xiang-de et al.	Xinjiang, Heshuo	2012.01.08 Ms5.0; 42.1°N, 87.5°E Maximum intensity: VI	soil-wood, brick-wood, brick-steel	41 surveyed sites		VI seismic design is required in this area; but many old and self-built houses; many site conditions are not good for construction	DISASTER LOSS ASSESSMENT AND CHARACTERISTIC OF SEIMIC HAZARD OF HESHUO EARTHQUAKE WITH MS 5. 0 IN XINJIANG ON JAN 8TH，2012 (in Chinese) 2012年7月新疆和硕5.0级地震灾害损失评估及震害特点分析
damage ratio (%)	sturcture type	collapse	serious damage	medium damge	slight damge	no damage
VI	soil-wood	0.004	0.107	0.367	0.374	0.148	6
	brick-wood	0	0	0.028	0.136	0.836	6
	brick-steel	0	0	0	0.677	0.323	6
3	2013	Li Shuai et al.	Xinjiang, Atushi	2013.03.11 Ms5.2; 40.2°N, 77.5°E; depth: 8km Maximum intensity: VI	soil-wood, brick-wood, brick-steel/RC, steel-frame	site survey		no damage ratio results are given; the bad site condition is the reason of damage loss; use the 2011 GB/T 18208.4 to decide damage-loss ratio	Disaster loss assessment and building seismic damage characteristics of Atushi earthquake with Ms5.2 in Xinjiang on March 11th, 2013 (in Chinese) 2013年3月11日阿图什5.2级地震灾害损失评估和房屋震害特征分析
damage-loss ratio (%)	sturcture type	collapse	serious damage	medium damge	slight damge	no damage		the application of the "Earthquake housing project" avoids fatality to a great scale; the damage is mainly due to the bad site condition and the soil-wood construction material
	soil-wood	1	1	0.4	0.4	0	damage-loss ratio
	brick-wood, brick-steel/RC, steel-frame	1	0.6	0.3	0.1	0
4	2013	Shi Yucheng et al.	Gansu, Min County and Zhang County	2013.07.22 Ms6.6; 34.5°N, 104.2°E; depth: 20km Maximum intensity: VIII	soil-wood, brick-wood, brick-concrete	418 surveyed sites		the low quality of soil/brick houses is the main cause of damage; the intensity of the hazardous area is divided according to GB/T17742-2008	Disaster Loss Assessment of the Minxian-Zhangxian Ms6.6 Earthquake, 2013 (in Chinese) 2013年岷县漳县6.6级地震灾害损失评估
damage ratio (%)	sturcture type	collapse	serious damage	medium damge	slight damge	no damage
VIII	soil-wood	0.355	0.397	0.164	0.057	0.027	8
	brick-wood	0.142	0.239	0.281	0.259	0.079	8
	brick-concrete	0.022	0.048	0.116	0.364	0.45	8
VII	soil-wood	0.14	0.213	0.255	0.236	0.156	7
	brick-wood	0.029	0.077	0.189	0.418	0.287	7
	brick-concrete	0.012	0.051	0.142	0.277	0.518	7
VI	soil-wood	0.033	0.06	0.105	0.194	0.608	6
	brick-wood	0.006	0.012	0.053	0.239	0.69	6
	brick-concrete	0	0	0.007	0.037	0.956	6
5	2014	Ge Ming et al.	Xinjiang, Yutian	2014.02.12 Ms7.3 Maximum intensity: VII	soil, wood, brick-wood, brick-concrete	216 surveyed sites		The dense population in the green delta with he existance of old and self-built houses is the main cause of damage loss	Direct economic loss and post-earthquake recovery and reconstruction fund evaluation of Yutian Ms7.3 earthquake on Feb. 12, 2014 (in Chinese) 2014年2月12日新疆于田Ms7.3地震直接经济损失和恢复重建经费评估
damage ratio (%)	sturcture type	collapse	serious damage	medium damge	slight damge	no damage
VII	soil	0.147	0.506			0.347	7
	wood	0.017	0.364			0.619	7
	brick-wood	0.002	0.049	0.085	0.348	0.516	7
	brick-concrete	0	0	0.021	0.304	0.675	7
VI	soil	0.08	0.3			0.62	6
	wood	0	0.068			0.932	6
	brick-wood	0	0.014	0.048	0.141	0.797	6
	brick-concrete	0	0	0.006	0.105	0.889	6
6	2017	Han Xiaofei et al.	Shanxi. Yuncheng, Yanhu District	2016.03.12 Ms4.4; depth: 5km Maximum intensity: VI	brick-concrete, brick-wood, soil-wood, steel frame			The shallow hypocenter of the earthquake leads to the large area suffering damage and loss; the large amount of newly built brick-steel houses has strong anti-EQ capability, which avoids large loss and fatality	The seismic damage assessment of Ms4.4 earthquake of Yuncheng Saline Lake District in March 12, 2016 (in Chinese) 2016年3月12日运城市盐湖区4.4级地震震害评估
damage-loss ratio (%)	sturcture type	collapse	serious damage	medium damge	slight damge	no damage
	brick-concrete	N/A	0.71	0.28	0.11	0.03	damage-loss ratio
	brick-wood	N/A	0.71	0.28	0.11	0.03
	soil-wood	N/A	0.9	0.4	0.4	0.03
	steel frame	N/A	N/A	N/A	0.11	0.03
7	2008	Master Thesis, Chen Hongfu	N/A	N/A	mansory, steel/RC	specialist inquiry		12 specialists are inquired; their results are weighed according to their professional levels	Study on Earthquake damage loss assessment of urban buildings' decorations (in Chinese) 城市房屋建筑震害损失评估方法研究
damage-loss ratio (%)	sturcture type	collapse	serious damage	medium damge	slight damge	no damage
	mansory	0.86-1	0.48-0.85	0.2-0.47	0.06-0.19	0-0.05	damage-loss ratio
	steel/RC	0.86-1	0.61-0.85	0.26-0.6	0.11-0.25	0.02-0.1
8	2017	Ming Xiaona et al.	Yunnan, northwest	25 EQs occurred during 1992-2015	steel frame,brick-concrete, brick-wood, soil-wood	statistics		Refer to Fig.1 for the ratio of different types of buildings in town and village	Evaluation of Building Features and Seismic Capaicty in Northwest Yunnan (in Chinese) 滇西北地区房屋建筑特征和抗震能力评价
damage ratio (%)	sturcture type	collapse	serious damage	medium damge	slight damge	no damage
VI	steel frame	0	0.0009	0.0089	0.1583	0.8319	6
	brick-concrete	0.0002	0.0029	0.0221	0.1933	0.7815	6
	brick-wood	0.0077	N/A	0.2359	N/A	0.7564	6
	soil-wood	0.0111	N/A	0.2725	N/A	0.7164	6
VII	steel frame	0	0.0169	0.0849	0.3186	0.5796	7
	brick-concrete	0.0039	0.0421	0.137	0.3302	0.4868	7
	brick-wood	0.0591	N/A	0.519	N/A	0.4219	7
	soil-wood	0.0901	N/A	0.5174	N/A	0.3925	7
VIII	steel frame	0.0169	0.0889	0.1538	0.3408	0.3996	8
	brick-concrete	0.0371	0.1359	0.3072	0.3339	0.1859	8
	brick-wood	0.2867	N/A	0.6107	N/A	0.1026	8
	soil-wood	0.3182	N/A	0.5734	N/A	0.1084	8
IX	steel frame	0.1926	0.1045	0.1916	0.2801	0.2312	9
	brick-concrete	0.1711	0.3367	0.2496	0.1321	0.1105	9
	brick-wood	0.6107	N/A	0.3817	N/A	0.0076	9
	soil-wood	0.6565	N/A	0.3435	N/A	0	9
9	2016	He Junhong et al.	Yunnan, rural area	80 EQs during 1993-2015	steel frame,brick-concrete, brick-wood, soil-wood	statistics		the damage is mainly in rural area. The fitting curves of these four building types in various damage states are also give in Page 3,4	Study on the vulnerability of buildings in rural areas of Yunnan province based on seismic damage statistics since 1993 (in Chinese) 基于1993年震灾统计的云南省农村地区房屋易损性研究
damage ratio (%)	sturcture type	collapse	serious damage	medium damge	slight damge	no damage
VI	steel frame	0	0.001	0.0092	0.1601	0.8317	6
	brick-concrete	0.0003	0.0032	0.0252	0.1942	0.7808	6
	brick-wood	0.0087	0.2407			0.7517	6
	soil-wood	0.0117	0.2771			0.7118	6
VII	steel frame	0	0.0213	0.0975	0.3304	0.5775	7
	brick-concrete	0.0044	0.0505	0.138	0.3283	0.4849	7
	brick-wood	0.0571	0.5303			0.4126	7
	soil-wood	0.086	0.5375			0.3763	7
VIII	steel frame	0.0146	0.0902	0.1546	0.3708	0.3847	8
	brick-concrete	0.0242	0.1279	0.3145	0.3547	0.1805	8
	brick-wood	0.2391	0.6563			0.1046	8
	soil-wood	0.2881	0.607			0.1055	8
IX	steel frame	0.023	0.2022	0.5278	0.2382	0.0088	9
	brick-concrete	0.11	0.3815	0.145	0.1805	0.183	9
	brick-wood	0.53	0.47			0	9
	soil-wood	0.591	0.409			0	9
≥X	steel frame	0.5778	0.1936	0.1429	0.0857	0	10
	brick-concrete	0.67	0.3	0.03	0	0	10
	brick-wood
	soil-wood
10	2012	Li Jing & Wen Ruizhi			industrial frame	fuzzy similarity theory and capacity spectrum		The same method can be applied to other structure types	Fast evaluation of seismic damage group vulnerability for a frame (in Chinese) 框架结构群体震害易损性快速评估研究
PGA	sturcture type	collapse	serious damage	medium damge	slight damge	no damage	PGA(g)
0.1	industrial frame	0	0	0.03	0.19	0.78	0.1
0.15		0	0.01	0.08	0.55	0.36	0.15
0.2		0.01	0.05	0.4	0.48	0.06	0.2
0.3		0.06	0.2	0.53	0.19	0.02	0.3
0.4		0.11	0.5	0.34	0.05	0	0.4
0.6		0.65	0.26	0.09	0	0	0.6
11	2015	Master Thesis, Wu Shanxiang	Xinjiang	37 EQs during 1993-2014	mansory: brick-wood, brick-concrete	statistics		damage ratios for individual EQs is also listed	Seismic vulnerability analysis of mansory buildings (in Chinese) 砌体结构地震易损性分析
damage ratio (%)	sturcture type	collapse	serious damage	medium damge	slight damge	no damage
VI	brick-wood	0.0028	0.0417	0.1353	0.3557	0.4645	6
	brick-concrete	0.0004	0.0178	0.0822	0.3153	0.5842	6
VII	brick-wood	0.0483	0.1291	0.2325	0.2804	0.3097	7
	brick-concrete	0.005	0.0856	0.1837	0.3424	0.3833	7
VIII	brick-wood	0.1978	0.2586	0.2218	0.1445	0.1773	8
	brick-concrete	0.1818	0.159	0.1768	0.2345	0.2479	8
IX	brick-wood	0.2	0.5	0.3	0	0	9
	brick-concrete	0.021	0.348	0.206	0.17	0.255	9
12	2017	Chen Xiangzhao et al.	Sichuan, Kangding	2014.11.22 Ms6.3; depth: 18km Maximum intensity: VIII	stone-wood, Chuandou-timber, mansory, steel frame	17 surveyed sites, around 100 buildings			The Characteristics of earthquake disasters distribution and seismic damage to structures in Kangding Ms6.3 earthquake (in Chinese) 四川康定6.3级地震灾害分布特点及结构震害简析
Urban/Township	sturcture type	collapse	serious damage	medium damge	slight damge	no damage
VI	steel frame	0	0	0	0.05	0.95	6
	mansory	0	0	0.06	0.11	0.83	6
	stone-wood	0	0.02	0.12	0.11	0.75	6
VII	steel frame	0	0	0.02	0.08	0.9	7
	mansory	0	0	0.09	0.15	0.76	7
	stone-wood	0	0.11	0.43	0.32	0.14	7
rural area	sturcture type	collapse	serious damage	medium damge	slight damge	no damage
VI	mansory	0	0	0.06	0.11	0.83	6
	Chuandou-timber	0	0	0.02	0.13	0.85	6
	stone-wood	0	0.01	0.09	0.12	0.78	6
VII	mansory	0	0	0.16	0.32	0.52	7
	Chuandou-timber	0	0	0.18	0.32	0.5	7
	stone-wood	0	0.13	0.54	0.22	0.11	7
VIII	mansory	0	0.06	0.12	0.44	0.38	8
	stone-wood	0.07	0.42	0.35	0.12	0.04	8
13	2015	Qiu Shurui & Gao Huiying	Qinghai, rural area	69 EQs during 2000-2014	steel-concrete, brick-concrete, brick-wood, soil-wood,wood,stone	statistics		the PGA-Intensity relationship is also given; Piao Yongjun (2013,朴永军) master thesis results are used to deduce the corresponding damage ratio for Qinghai province	The research of rural dwelling's seismic vulnerability in Qinghai (in Chinese) 青海省农居地震灾害易损性研究
VI	sturcture type	collapse	serious damage	medium damge	slight damge	no damage
	steel-concrete	0	0.009	0.024	0.195	0.77	6
	brick-concrete	0	0.007	0.039	0.199	0.755	6
	brick-wood	0	0.009	0.057	0.205	0.729	6
	soil-wood	0	0.03	0.15	0.32	0.5	6
	wood	0.01	0.021	0.0455	0.219	0.705	6
	stone	0.046	0.084	0.186	0.228	0.456	6
VII	steel-concrete	0	0.038	0.194	0.292	0.476	7
	brick-concrete	0.031	0.119	0.231	0.278	0.341	7
	brick-wood	0.039	0.121	0.241	0.288	0.311	7
	soil-wood	0.075	0.134	0.256	0.34	0.195	7
	wood	0.05	0.13	0.251	0.291	0.278	7
	stone	0.09	0.1545	0.358	0.2265	0.171	7
VIII	steel-concrete	0.022	0.182	0.352	0.26	0.184	8
	brick-concrete	0.109	0.359	0.254	0.163	0.115	8
	brick-wood	0.118	0.36	0.264	0.173	0.085	8
	soil-wood	0.282	0.28	0.29	0.07	0.078	8
	wood	0.12	0.378	0.274	0.185	0.043	8
	stone	0.238	0.298	0.329	0.115	0.02	8
IX	steel-concrete	0.107	0.493	0.119	0.119	0.162	9
	brick-concrete	0.437	0.28	0.21	0.055	0.018	9
	brick-wood	0.438	0.281	0.211	0.056	0.014	9
	soil-wood	0.602	0.17	0.165	0.037	0.026	9
	wood	0.439	0.282	0.211	0.057	0.011	9
	stone	0.527	0.367	0.096	0.01	0	9
X	steel-concrete	0.421	0.458	0.067	0.028	0.026	10
	brick-concrete	0.597	0.264	0.102	0.026	0.011	10
	brick-wood	0.598	0.265	0.163	0.027	0.007	10
	soil-wood	0.878	0.095	0.02	0.007	0	10
	wood	0.599	0.265	0.105	0.026	0.005	10
	stone	0.735	0.226	0.039	0	0	10
14	2012	Sun Baitao & Zhang Guixin	Sichuan, Wenchuan	2008.05.12 Ms8.0	fortificated and unfortificated mansory	site survey			Statistical analysis of the seismic vulnerability of various types of building structures in Wenchuan Ms8.0 earthquake (in Chinese) 汶川8.0级地震中各类建筑结构地震易损性统计分析
	sturcture type	collapse	serious damage	medium damge	slight damge	no damage
VI	forticated mansory	0	0.2	0.6	N/A	0.2	6
	unfortificated mansory	N/A	0.6667	N/A	0.3333	N/A	6
VII	forticated mansory	0.0046	0.0456	0.1626	0.3526	0.4347	7
	unfortificated mansory	0.0189	0.117	0.2528	0.3245	0.2868	7
VIII	forticated mansory	0.0139	0.2282	0.2787	0.2578	0.2213	8
	unfortificated mansory	0.1012	0.3452	0.2083	0.25	0.0952	8
IX	forticated mansory	0.0868	0.3529	0.2997	0.1625	0.098	9
	unfortificated mansory	0.1088	0.5649	0.1925	0.0711	0.0628	9
X	forticated mansory	0.0345	0.1379	0.2529	0.2529	0.3218	10
	unfortificated mansory	0.2549	0.3137	0.1373	0.1961	0.098	10
XI	forticated mansory	0.013	0.3421	0.0921	0.2237	0.3291	11
	unfortificated mansory	0.4203	0.3188	0.087	0.1014	0.0725	11
15	2017	Ye Zhaoheng et al.	Sichuan, Tibeten people	EQs during 1993-2017	Tibeten brick-wood				Study on the Earthquake damage characteristics of Tibetan dwellings in Sichuan province (in Chinese) 四川省藏式民居震害特征研究
	sturcture type	collapse	serious damage	medium damge	slight damge	no damage
VI	Tibeten brick-wood (with mud or stone as the wall)	0.0236	0.3514			0.625	6
VII		0.1098	0.4424			0.4478	7
VIII		0.3182	0.5847			0.0971	8
IX		0.5033	0.4967			0	9
16	2013	Li Chengshuai et al.	Sichuan	10 EQs during 1933-1996 (from quoted literature)	steel-concrete, mansory, single-storey, others	statistics		The damage ratio is picked from "四川省房屋建筑易损性研究, 2002, 何玉林等"	Rapid assessment of direct economic loss caused by Ms7.0 Lushan, Sichuan earthquake 四川芦山7.0级地震直接经济损失快速评估
	sturcture type	collapse	serious damage	medium damge	slight damge	no damage
VI	steel-concrete	0	0	0	0	1	6
	mansory	0.013	0.0514	0.1295	0.3032	0.5129	6
	single-storey	0	0	0.053	0.18	0.767	6
	others	0	0	0.053	0.206	0.741	6
VII	steel-concrete	0	0	0	0	1	7
	mansory	0.0547	0.1163	0.1764	0.253	0.4016	7
	single-storey	0	0.053	0.18	0.66	0.106	7
	others	0	0.068	0.2	0.338	0.394	7
VIII	steel-concrete	0	0	0.0332	0.2026	0.7642	8
	mansory	0.1291	0.1985	0.2211	0.2084	0.2429	8
	single-storey	0.041	0.173	0.646	0.129	0.011	8
	others	0.055	0.294	0.398	0.18	0.073	8
IX	steel-concrete	0.054	0.213	0.4736	0.2504	0.009	9
	mansory	0.2586	0.2768	0.21	0.1482	0.1064	9
	single-storey	0.166	0.678	0.135	0.02	0	9
	others	0.135	0.429	0.351	0.085	0	9
damage-loss ratio		1	0.7	0.4	0.15	0	damage-loss ratio
17	2008	Wei Fuquan et al.	Fujian		steel-concrete, brick-concrete, wood-timber, others	statistics
	A fast approach to regional hazard evaluation based on population statistical data 基于人口统计数据的区域震害快速评估方法
	sturcture type	collapse	serious damage	medium damge	slight damge	no damage
VI	steel-concrete	0	0	0	0.03	0.97	6
	brick-concrete	0	0	0.02	0.14	0.84	6
	wood-timber	0	0	0.04	0.51	0.45	6
	others	0	0	0.05	0.42	0.53	6
VII	steel-concrete	0	0	0.01	0.06	0.93	7
	brick-concrete	0	0.01	0.05	0.66	0.28	7
	wood-timber	0	0.06	0.31	0.45	0.18	7
	others	0	0.03	0.42	0.41	0.14	7
VIII	steel-concrete	0	0.01	0.09	0.43	0.47	8
	brick-concrete	0.01	0.044	0.62	0.28	0.046	8
	wood-timber	0.05	0.22	0.51	0.22	0	8
	others	0.02	0.28	0.54	0.16	0	8
IX	steel-concrete	0.02	0.14	0.39	0.42	0.03	9
	brick-concrete	0.07	0.6	0.27	0.05	0.01	9
	wood-timber	0.34	0.42	0.24	0	0	9
	others	0.22	0.49	0.25	0.04	0	9
X	steel-concrete	0.23	0.55	0.19	0.03	0	10
	brick-concrete	0.53	0.38	0.09	0	0	10
	wood-timber	0.58	0.34	0.08	0	0	10
	others	0.72	0.25	0.03	0	0	10
18	2007	Shi Weihua et al.	Yunnan		frame, brick-concrete, brick-wood, soil-wood	site survey
	2007年宁洱6.4级地震的震害指数与烈度
	sturcture type	collapse	serious damage	medium damge	slight damge	no damage
urban area1, VIII	frame	0	0.03	0.06	0.38	0.52	8
	brick-concrete	0.02	0.12	0.21	0.42	0.23	8
	brick-wood	0.25	0	0.7	0	0.05	8
	soil-wood	0.53	0	0.46	0	0.01	8
urban area2, VI	frame	0	0	0	0.18	0.82	6
	brick-concrete	0	0	0	0.07	0.93	6
	brick-wood	0	0	0.18	0	0.82	6
	soil-wood	0	0	0.11	0	0.89	6
rural area1, VIII	frame	0.09	0.26	0.25	0.27	0.13	8
	brick-concrete	0.02	0.33	0.37	0.2	0.08	8
	brick-wood	0.55	0	0.4	0	0.05	8
	soil-wood	0.59	0	0.41	0	0.01	8
rural area2, VII	frame	0	0	0.14	0.71	0.15	7
	brick-concrete	0	0	0.18	0.65	0.17	7
	brick-wood	0.01	0	0.88	0	0.11	7
	soil-wood	0.18	0	0.49	0	0.33	7
rural area3, VI	frame	0	0	0	0.13	0.87	6
	brick-concrete	0	0	0	0.26	0.74	6
	brick-wood	0	0	0.26	0	0.73	6
	soil-wood	0.01	0	0.28	0	0.71	6
19	2007	Wang Yongzhe, master thesis			RC frame, brick-concrete, brick-wood, soil-wood	analysis method
	基于ArcGIS城市房屋建筑震害预测信息系统的研制
	sturcture type	collapse	serious damage	medium damge	slight damge	no damage
VI	RC frame	0	0	0	0.12	0.88	6
VII		0	0	0.02	0.23	0.75	7
VIII		0.002	0.015	0.103	0.33	0.55	8
IX		0.015	0.075	0.255	0.305	0.35	9
X		0.075	0.165	0.405	0.203	0.15	10
VI	brick-concrete	0.0017	0.0136	0.0542	0.2608	0.6697	6
VII		0.0096	0.036	0.0897	0.2311	0.6337	7
VIII		0.031	0.0825	0.1627	0.2412	0.4825	8
IX		0.089	0.1608	0.2339	0.2297	0.2867	9
X		0.2506	0.2805	0.2443	0.1404	0.0842	10
VI	brick-wood	0.0182	0.0676	0.1505	0.2715	0.49	6
VII		0.0836	0.2027	0.2207	0.2129	0.28	7
VIII		0.1828	0.3022	0.2309	0.1633	0.12	8
IX		0.3767	0.2608	0.1766	0.1053	0.08	9
X		0.6384	0.1721	0.1191	0.0481	0.022	10
VI	soil-wood	0.025	0.165	0.225	0.265	0.325	6
VII		0.19	0.26	0.2	0.185	0.165	7
VIII		0.375	0.27	0.165	0.12	0.07	8
IX		0.5	0.25	0.14	0.085	0.025	9
X		0.73	0.17	0.075	0.015	0	10
20	2007	Hu Shaoqing et al.	south of 35°N		mansory
	经验震害矩阵的完善方法研究
	sturcture type	collapse	serious damage	medium damge	slight damge	no damage
VI	mansory with VI fortification level	0.0027	0.021	0.0761	0.2923	0.6079	6
VII		0.0155	0.0569	0.1301	0.2711	0.5264	7
VIII		0.0501	0.1274	0.2189	0.2621	0.3416	8
IX		0.1391	0.2322	0.2667	0.2107	0.1512	9
X		0.363	0.1391	0.2038	0.0773	0.0243	10
21	2008	Yuan Yifan	Wenchuan neighboring area		frame, brick-concrete, brick-wood, soil-wood	site survey
	四川汶川8.0级地震损失评估及其教训
EQ Intensity	sturcture type	collapse	serious damage	medium damge	slight damge	no damage
X	frame	0.1306	0.1484	0.2286	0.2101	0.2823	10
	brick-concrete	0.2932	0.1877	0.4495	0.0649	0.0047	10
	brick-wood	0.7733	0.2267			0	10
	soil-wood	0.7875	0.2125			0	10
IX	frame	0.038	0.1935	0.247	0.2078	0.3137	9
	brick-concrete	0.1081	0.2189	0.2373	0.1926	0.2431	9
	brick-wood	0.4084	0.4173			0.1743	9
	soil-wood	0.6883	0.2819			0	9
VIII	frame	0.003	0.0175	0.0599	0.0964	0.8232	8
	brick-concrete	0.0295	0.0537	0.264	0.1058	0.547	8
	brick-wood	0.1065	0.3548			0.5387	8
	soil-wood	0.2006	0.4737			0.3257	8
VII	frame	0	0.003	0.0213	0.0527	0.923	7
	brick-concrete	0.0091	0.0194	0.0432	0.1028	0.8255	7
	brick-wood	0.0368	0.2086			0.7546	7
	soil-wood	0.0886	0.2578			0.6536	7
22	2008	Wang Xianghao			soil-wood, brick-wood, brick-concrete	statistics
	我国村镇震害特征及房屋结构类型
Overall damage ratio in individual EQ	sturcture type	collapse	serious damage	medium damge	slight damge	no damage
1996.02 Ms7.0 Lijiang EQ	soil-wood	0.4896	0.2132	0.1518	0.1198	0.0259
	brick-wood	0.06	0.1596	0.2985	0.325	0.1569
	brick-concrete	0.0013	0.0864	0.2006	0.3294	0.3824
1996.05 M6.4 Baotou EQ	soil-wood	0.1	0.2538	0.2732	0.1997	0.1734
	brick-wood	0.0608	0.1923	0.2325	0.206	0.3085
	brick-concrete	0.0001	0.0196	0.0702	0.1525	0.7573
2003.02 M6.8 Bachu, Xinjiang EQ	soil-wood	0.4872	0.1338	0.1162	0.1208	0.142
	brick-wood	0.0667	0.2683	0.2973	0.177	0.1907
	brick-concrete	0.0087	0.1683	0.1857	0.2723	0.365
soil-wood in Bachu	VII	0.0338	0.1294	0.1739	0.2522	0.4104	7
	VIII	0.4274	0.272	0.1748	0.1101	0.0155	8
	IX	1	0	0	0	0	9
brick-wood in Bachu	VII	0	0.055	0.192	0.281	0.472	7
	VIII	0	0.25	0.4	0.25	0.1	8
	IX	0.2	0.5	0.3	0	0	9
brick-concrete in Bachu	VII	0	0.037	0.076	0.302	0.585	7
	VIII	0.005	0.12	0.275	0.345	0.255	8
	IX	0.021	0.348	0.206	0.17	0.255	9
23	2011	Wang Huishan et al.	buildings in Fujian area		RC	method in Sun & Hu (2010), 相似度方法
	基于震害影响因子的区域建筑易损性分析方法
Intensity	sturcture type	collapse	serious damage	medium damge	slight damge	no damage
VI	RC built before 1989 in Zhangpu, Fujian	0	0	0	0.08	0.92	6
VII		0	0	0.06	0.06	0.88	7
VIII		0.01	0.08	0.17	0.53	0.21	8
IX		0.51	0.38	0.1	0.01	0	9
X		0.96	0.04	0	0	0	10
VI	2-6 storey RC in Zhangpu, Fujian	0	0	0	0.02	0.98	6
VII		0	0	0	0.03	0.97	7
VIII		0.03	0.08	0.3	0.37	0.22	8
IX		0.42	0.36	0.24	0.03	0	9
X		0.96	0.04	0	0	0	10
VI	usage for living RC in Zhangpu, Fujian	0	0	0	0.02	0.98	6
VII		0	0.01	0.02	0.27	0.7	7
VIII		0.03	0.05	0.29	0.38	0.25	8
IX		0.32	0.36	0.31	0.01	0	9
X		0.95	0.04	0.01	0	0	10
VI	official reports for RC in Zhangpu, Fujian by 福建地震局，工力所	0	0	0	0.02	0.98	6
VII		0	0.01	0.02	0.15	0.82	7
VIII		0	0.05	0.12	0.53	0.3	8
IX		0.29	0.37	0.32	0.02	0	9
X		0.87	0.11	0.02	0	0	10
VI	updated damage ratio in Minnan, Fujian using Similarity method, 闽南地区相似度方法改进后	0	0	0	0.01	0.99	6
VII		0	0	0.09	0.16	0.85	7
VIII		0	0.01	0.12	0.56	0.31	8
IX		0.02	0.21	0.42	0.32	0.03	9
X		0.23	0.37	0.25	0.15	0	10
VI	official reports for RC in Minnan闽南, Fujian by 福建地震局，工力所	0	0	0	0.12	0.88	6
VII		0	0	0.02	0.23	0.75	7
VIII		0.01	0.01	0.1	0.33	0.55	8
IX		0.03	0.25	0.26	0.31	0.15	9
X		0.27	0.46	0.21	0.05	0.01	10
24	2011	Zhou Guangquan et al.	Yunnan		soil-wood, brick-wood
	云南地区简易房屋的震害指数研究
Intensity	sturcture type	collapse	serious damage	medium damge	slight damge	no damage
VI	soil-wood	0.0003	0.0067	0.0646	0.2487	0.6797	6
	brick-wood	0.0004	0.0048	0.0445	0.2176	0.7327	6
VII	soil-wood	0.0044	0.0651	0.197	0.3465	0.3867	7
	brick-wood	0.0019	0.0387	0.2134	0.3331	0.4128	7
VIII	soil-wood	0.0417	0.1992	0.3784	0.3117	0.0702	8
	brick-wood	0.0121	0.1789	0.365	0.3625	0.1392	8
IX	soil-wood	0.15	0.4415	0.263	0.146	0	9
	brick-wood	0.13	0.4	0.28	0.19	0	9
25	1986	Liu Huixian			multi-storey brick building
	唐山大地震震害
	2007	Feng Qimin & Wang Huajuan			multi-storey brick building
	群体建筑物地震破坏概率模型研究
Intensity	sturcture type	collapse	serious damage	medium damge	slight damge	no damage
VI	multi-storey brick building	0	0.014	0.122	0.402	0.462	6
VII		0	0.131	0.217	0.217	0.435	7
VIII		0	0.235	0.294	0.353	0.118	8
IX		0.251	0.325	0.343	0.068	0.013	9
X		0.68	0.199	0.065	0.05	0.006	10
26	2012	Meng Ziyang et al.			multi-storey brick concrete, multi-storey steel concrete, high-storey, single-storey	震害因子法，更多的像是数学运算，其可靠性有待细查 by 郑州的 孟紫阳
	保定市群体建筑震害预测研究
Based on the number of damaging houses
Intensity	sturcture type	collapse	serious damage	medium damge	slight damge	no damage
VI	multi-storey brick concrete	0	0.042	0.3411	0.3646	0.2523	6
VII		0.042	0.3411	0.3646	0.2523	0	7
VIII		0.3832	0.3646	0.2523	0	0	8
IX		0.5297	0.4685	0.0018	0	0	9
X		0.7477	0.2523	0	0	0	10
VI	multi-storey steel concrete	0	0	0	0.2418	0.7582	6
VII		0	0	0.2418	0.7143	0.044	7
VIII		0	0.2418	0.7143	0.044	0	8
IX		0.0769	0.7692	0.1538	0	0	9
X		0.2418	0.7143	0.044	0	0	10
VI	high-storey	0	0	0	0.0231	0.9769	6
VII		0	0	0.0231	0.9075	0.0694	7
VIII		0	0.0231	0.9075	0.0694	0	8
IX		0.0058	0.0578	0.9364	0	0	9
X		0.0231	0.9075	0.0694	0	0	10
VI	single-storey	0.0017	0.2623	0.7065	0.0294	0	6
VII		0.2641	0.7065	0.0294	0	0	7
VIII		0.9706	0.0294	0	0	0	8
IX		0.9931	0.0069	0	0	0	9
X		1	0	0	0	0	10
Based on the area of damaging houses
VI	multi-storey brick concrete	0	0.0111	0.0769	0.4375	0.4745	6
VII		0.0111	0.0769	0.4375	0.4745	0	7
VIII		0.088	0.4375	0.4745	0	0	8
IX		0.2443	0.7521	0.0036	0	0	9
X		0.5255	0.4745	0	0	0	10
VI	multi-storey steel concrete	0	0	0	0.2655	0.7345	6
VII		0	0	0.2655	0.6924	0.0421	7
VIII		0	0.2655	0.6924	0.0421	0	8
IX		0.1084	0.7436	0.148	0	0	9
X		0.2655	0.6924	0.0421	0	0	10
VI	high-storey	0	0	0	0.02	0.98	6
VII		0	0	0.02	0.9108	0.0693	7
VIII		0	0.02	0.9108	0.0693	0	8
IX		0.0032	0.0401	0.9566	0	0	9
X		0.02	0.9108	0.0693	0	0	10
VI	single-storey	0.0063	0.2347	0.7093	0.0498	0	6
VII		0.241	0.7093	0.0498	0	0	7
VIII		0.9502	0.0498	0	0	0	8
IX		0.9848	0.0152	0	0	0	9
X		1	0	0	0	0	10
27	2013	Wang Mingzhen, Master			single-storey brick industrial plant
	单层砖柱厂房震害分析及破坏机理研究
Intensity	sturcture type	collapse	serious damage	medium damge	slight damge	no damage
VI	single-storey brick industrial plant	0	0	0.2	0.38	0.42	6
VII		0.02	0.14	0.22	0.34	0.28	7
VIII		0.2	0.26	0.36	0.09	0.09	8
IX		0.43	0.57	0	0	0	9
X		0.53	0.47	0	0	0	10
7	2013	Zhou Guanghai et al.			brick-wood, frame
	基于GIS的地震建筑直接经济损失评估研究
Intensity	sturcture type	collapse	serious damage	medium damge	slight damge	no damage
VI	brick-wood	0.0282	0.1706			0.8012	6
VII		0.15	0.48			0.37	7
VIII		0.3484	0.548			0.1036	8
IX		0.591	0.409			0	9
IX+		0.7875	0.2125			0	9.5
VI	frame	0	0.0007	0.0058	0.1062	0.8873	6
VII		0.0001	0.0119	0.0544	0.2009	0.7327	7
VIII		0.0157	0.064	0.0983	0.2628	0.5592	8
IX		0.023	0.2022	0.5278	0.2382	0.0088	9
IX+		0.5778	0.1936	0.1429	0.0857	0	9.5
28	2013	阿那尔	for buildings in Inner-mogolia		steel-concrete, brick-concrete, brick-wood, soil-wood
	基于简易法的呼和浩特市地震灾害损失预测
statistical and predicted damage ratios in Shihezi area
Intensity	sturcture type	collapse	serious damage	medium damge	slight damge	no damage
VIII	steel-concrete	0.01	0.04	0.14	0.32	0.49	8
IX		0.05	0.17	0.29	0.38	0.11	9
VIII	brick-concrete	0.02	0.15	0.3	0.33	0.2	8
IX		0.17	0.33	0.29	0.14	0.07	9
VIII	brick-wood	0.06	0.2	0.42	0.22	0.1	8
IX		0.26	0.5	0.12	0.09	0.03	9
VIII	soil-wood	0.1	0.41	0.32	0.15	0.02	8
IX		0.36	0.39	0.18	0.07	0	9
predicted damage ratio based on calculated intensity in several area of Inner-mongolia
Xincheng area	sturcture type	collapse	serious damage	medium damge	slight damge	no damage
VIII	steel-concrete	0.01	0.04	0.14	0.32	0.49	8
	brick-concrete	0.02	0.15	0.3	0.33	0.2	8
	brick-wood	0.06	0.2	0.42	0.22	0.1	8
	soil-wood	0.1	0.41	0.32	0.15	0.02	8
IX	steel-concrete	0.364286	0.0357143	0.121429	0.207143	0.271429	9
	brick-concrete	0.17	0.33	0.29	0.14	0.07	9
	brick-wood	0.26	0.5	0.12	0.09	0.03	9
	soil-wood	0.36	0.39	0.18	0.07	0	9
Huimin area	sturcture type	collapse	serious damage	medium damge	slight damge	no damage
VIII	steel-concrete	0.01	0.04	0.14	0.32	0.49	8
	brick-concrete	0.02	0.15	0.3	0.33	0.2	8
	brick-wood	0.06	0.2	0.42	0.22	0.1	8
	soil-wood	0.1	0.41	0.32	0.15	0.02	8
IX	steel-concrete	0.05	0.17	0.29	0.38	0.11	9
	brick-concrete	0.17	0.33	0.29	0.14	0.07	9
	brick-wood	0.259843	0.499697	0.119927	0.0902483	0.0302847	9
	soil-wood	0.36	0.39	0.18	0.07	0	9
Saihan area	sturcture type	collapse	serious damage	medium damge	slight damge	no damage
VIII	steel-concrete	0.00993658	0.0399577	0.139958	0.320085	0.490063	8
	brick-concrete	0.0199369	0.150025	0.30005	0.329955	0.200033	8
	brick-wood	0.060396	0.2	0.419802	0.219802	0.1	8
	soil-wood	0.0999367	0.409867	0.320051	0.149905	0.0202404	8
IX	steel-concrete	0.0501057	0.169979	0.290063	0.379915	0.109937	9
	brick-concrete	0.169934	0.330066	0.290033	0.140033	0.0699336	9
	brick-wood	0.260396	0.5	0.119802	0.090099	0.029703	9
	soil-wood	0.360127	0.389873	0.179747	0.0702532	0	9
Yuquan area	sturcture type	collapse	serious damage	medium damge	slight damge	no damage
VIII	steel-concrete	0.00989583	0.0401042	0.140104	0.319792	0.490104	8
	brick-concrete	0.02	0.15	0.3	0.33	0.2	8
	brick-wood	0.0600978	0.19986	0.419986	0.220126	0.0999301	8
	soil-wood	0.0998948	0.410095	0.319664	0.150368	0.019979	8
IX	steel-concrete	0.05	0.169792	0.290104	0.380208	0.109896	9
	brick-concrete	0.17	0.33	0.29	0.14	0.07	9
	brick-wood	0.259958	0.499651	0.120196	0.0901468	0.0300489	9
	soil-wood	0.359621	0.390116	0.179811	0.0704522	0	9
Huhehaote City	sturcture type	collapse	serious damage	medium damge	slight damge	no damage
VIII	steel-concrete	0.0100497	0.0399959	0.139986	0.319968	0.490001	8
	brick-concrete	0.0199803	0.15	0.3	0.33002	0.2	8
	brick-wood	0.0599244	0.2	0.420038	0.220038	0.1	8
	soil-wood	0.0999805	0.409862	0.320016	0.150068	0.0200741	8
IX	steel-concrete	0.0500406	0.170016	0.289992	0.379923	0.110028	9
	brick-concrete	0.16998	0.33002	0.29001	0.14001	0.0699803	9
	brick-wood	0.259924	0.5	0.120038	0.0899811	0.0300567	9
	soil-wood	0.360039	0.390058	0.179922	0.0699805	0	9
29	2001	Song Lijun et al.			steel-concrete, industrial plant, single-storey vocal house, single-storey soil-wood, single-storey brick-wood
	石河子市建筑物群体易损性矩阵的建立方法及震害预测
	sturcture type	collapse	serious damage	medium damge	slight damge	no damage
VI	steel-concrete	0	0	0	0.04	0.96	6
VII		0	0	0.02	0.14	0.84	7
VIII		0.01	0.04	0.14	0.32	0.49	8
IX		0.05	0.17	0.29	0.38	0.11	9
VI	industrial plant	0	0	0.06	0.19	0.75	6
VII		0	0.03	0.18	0.28	0.51	7
VIII		0.02	0.18	0.29	0.32	0.19	8
IX		0.18	0.32	0.29	0.15	0.06	9
VI	single-storey vocal house	0	0	0	0.3	0.7	6
VII		0	0.12	0.19	0.28	0.41	7
VIII		0.13	0.13	0.35	0.34	0.05	8
IX		0.21	0.22	0.35	0.22	0	9
VI	single-storey soil-wood	0	0.02	0.06	0.54	0.38	6
VII		0.01	0.06	0.54	0.33	0.06	7
VIII		0.1	0.41	0.32	0.15	0.02	8
IX		0.36	0.39	0.18	0.72	0	9
VI	single-storey brick-wood	0	0.01	0.05	0.27	0.67	6
VII		0.01	0.05	0.16	0.29	0.5	7
VIII		0.06	0.2	0.42	0.22	0.1	8
IX		0.26	0.5	0.12	0.09	0.03	9
30	2013	Sun Baitao et al.			unfortificated single-storey industrial plant	statistics
	芦山7.0级地震单层砖柱排架厂房震害特征及抗震分析
	sturcture type	collapse	serious damage	medium damge	slight damge	no damage
VI	unfortificated single-storey industrial plant	N/A	N/A	N/A	0.15	0.85	6
VII		0.01	0.04	0.13	0.17	0.65	7
VIII		0.08	0.16	0.2	0.22	0.34	8
IX		0.17	0.32	0.23	0.14	0.14	9
X		0.36	0.33	0.17	0.07	0.07	10
XI		0.72	0.21	0.05	0.02	N/A	11
31	1990	Yin Zhiqian et al.			multi-storey brick, single-storey industrial plant	statistics
	震害与地震损失的估计方法
	sturcture type	collapse	serious damage	medium damge	slight damge	no damage
VII	multi-storey brick	0.01	0.08	0.13	0.33	0.4	7
VIII		0.05	0.17	0.25	0.19	0.34	8
IX		0.15	0.45	0.25	0.09	0.06	9
X		0.65	0.23	0.08	0.03	0.01	10
VII	single-storey industrial plant	0.26	0.58	0.16	0	0	7
VIII		0.17	0.27	0.31	0.23	0.02	8
IX		0.05	0.28	0.39	0.24	0.04	9
X		0.15	0.11	0.26	0.23	0.26	10
32	2014	Zhang Yu et al.	buildings in Changchun City		multi-storey mansory, multi-storey RC, singe-storey brick column, single-storey RC column	Yin (1995)
	基于GIS的长春市建筑物震害预测技术
Intensity	sturcture type	collapse	serious damage	medium damge	slight damge	no damage
VI	multi-storey mansory, damage ratio by No. of buildings	0	0	0	0.0874	0.9126	6
VII		0	0	0.0361	0.0721	0.8918	7
VIII		0.0009	0.0689	0.1585	0.4164	0.3475	8
IX		0.0579	0.1552	0.4219	0.282	0.0831	9
VI	multi-storey mansory, damage ratio by construction area of buildings	0	0	0	0.114	0.886	6
VII		0	0	0.0303	0.1074	0.8624	7
VIII		0.0177	0.0879	0.1672	0.3539	0.3733	8
IX		0.0539	0.1985	0.3636	0.3107	0.0732	9
VI	multi-storey RC, damage ratio by No. of buildings	0	0	0	0.0405	0.9595	6
VII		0	0	0.0081	0.0526	0.9393	7
VIII		0.004	0.0081	0.081	0.2753	0.6316	8
IX		0.0162	0.0526	0.1579	0.4534	0.3198	9
VI	multi-storey RC, damage ratio by construction area of buildings	0	0	0	0.0901	0.9099	6
VII		0	0	0.0164	0.0915	0.8921	7
VIII		0.0062	0.0128	0.107	0.2255	0.6485	8
IX		0.019	0.092	0.117	0.381	0.391	9
VI	single-storey brick column, damage ratio by No. of buildings	0	0	0	0.0727	0.9273	6
VII		0	0	0.0303	0.1152	0.8545	7
VIII		0.0242	0.0909	0.2606	0.3515	0.2727	8
IX		0.0606	0.2364	0.4364	0.2061	0.0606	9
VI	single-storey brick column, damage ratio by construction area of buildings	0	0	0	0.0436	0.9564	6
VII		0	0	0.0205	0.1095	0.87	7
VIII		0.0177	0.0912	0.2285	0.3508	0.3154	8
IX		0.0436	0.2169	0.47	0.2201	0.0494	9
VI	single-storey RC column, damage ratio by No. of buildings	0	0	0	0.0286	0.9714	6
VII		0	0	0.0286	0.0714	0.9	7
VIII		0	0.0143	0.0714	0.2714	0.6429	8
IX		0.0286	0.1429	0.3143	0.4143	0.1	9
VI	single-storey RC column, damage ratio by construction area of buildings	0	0	0	0.0247	0.9753	6
VII		0	0	0.0178	0.0662	0.916	7
VIII		0	0.0093	0.0706	0.3345	0.5855	8
IX		0.0178	0.0982	0.4633	0.2226	0.198	9
33	2014	Qu Zhe et al.	Sichuan, Lushan EQ		unconstrained mansory, Chuandou-timber, fortificated building	site survey
样本较少，慎重使用	四川芦山7.0级地震中非抗震设防民居震害特征
Intensity	sturcture type	collapse	serious damage	medium damge	slight damge	no damage
IX in Shuangshi Town	unconstrained mansory	0.4	0.3	0.2	0.1	0	9
	Chuandou-timber	0.25	0.17	0.42	0.33	0	9
	fortificated building	0	0	0.08	0.08	0.83	9
VIII in Dayu Village	unconstrained mansory	0.27	0.45	0.09	0.09	0.09	8
	Chuandou-timber	0	0	0.33	0.67	0	8
	fortificated building	0	0	0	0	0	8
VIII in Xichuan Village	unconstrained mansory	0.17	0.17	0.33	0.33	0	8
	Chuandou-timber	0	0	0.08	0.83	0.08	8
	fortificated building	0	0	0	0	1	8
34	2015	Zhou Wenqi et al.	for buildings in south Fujian Province	福州大学学报	single-storey industrial plant, mansory, stone, others, old building, high-storey, frame	建筑物类比法推断damage ratio
	闽南地区群体建筑调查及易损性分析
Intensity	sturcture type	collapse	serious damage	medium damge	slight damge	no damage
VI	single-storey industrial plant	0	0	0	0	1	6
VII		0	0	0	0.0441	0.9559	7
VIII		0	0.0294	0.9706	0	0	8
IX		0.0294	0.9706	0	0	0	9
X		0.6765	0.3235	0	0	0.6	10
VI	mansory	0.0005	0.024	0.0794	0.3338	0.5623	6
VII		0.0212	0.054	0.3661	0.5586	0	7
VIII		0.0665	0.2498	0.6837	0	0	8
IX		0.3093	0.6907	0	0	0	9
X		0.5563	0.4437	0	0	0	10
VI	stone	0.0049	0.0211	0.1626	0.5935	0.2179	6
VII		0.0341	0.1138	0.639	0.213	0	7
VIII		0.1447	0.3675	0.4878	0	0	8
IX		0.5886	0.4114	0	0	0	9
X		0.9398	0.0602	0	0	0	10
VI	others	0	0.0204	0.1837	0.7551	0.0408	6
VII		0	0.0408	0.8776	0.0816	0	7
VIII		0.0408	0.2857	0.6735	0	0	8
IX		0.3265	0.6735	0	0	0	9
X		0.7143	0.2857	0	0	0	10
VI	old building	0.0035	0.1315	0.1626	0.7024	0	6
VII		0.2941	0.0692	0.6367	0	0	7
VIII		0.308	0.6228	0.0692	0	0	8
IX		0.4844	0.5156	0	0	0	9
X		0.9308	0.0692	0	0	0	10
VI	high-storey	0	0	0	0	1	6
VII		0	0	0	0	1	7
VIII		0	0	0	0.8626	0.1374	8
IX		0	0	0.8626	0.0495	0.0879	9
X		0	0.8626	0.0549	0.0824	0	10
VI	frame	0	0	0	0	1	6
VII		0	0	0	0.3915	0.6085	7
VIII		0	0.0009	0.5507	0.2831	0.1653	8
IX		0.0066	0.6554	0.3019	0.0362	0	9
X		0.2338	0.7653	0.0009	0	0	10
35	2016	Zhang Qiushi et al.	Panzhihua City in Sichuan Province		Mansory	damage index follows beta distribution as suggested by Hu Shaoqing et al. (2007)
	攀枝花地区震后砌体结构易损性分析
Intensity	sturcture type	collapse	serious damage	medium damge	slight damge	no damage
VI	mansory	0	0.03	0.11	0.34	0.52	6
VII		0.01	0.1	0.17	0.41	0.31	7
VIII		0.04	0.25	0.36	0.21	0.14	8
IX		0.21	0.34	0.24	0.15	0.05	9
X		0.57	0.25	0.11	0.05	0.01	10
36	2017	Lv Guojun et al.	for buildings in Langfang City			predicted damage ratio based on empirical index
	廊坊市重要建筑物易损性分析
Intensity	sturcture type	collapse	serious damage	medium damge	slight damge	no damage
Based on building types
VII	ground frame 底框结构	0	0	0	17. 86	82. 14	7
VIII		0	0	17. 86	82. 14	0	8
IX		0	17.86	82. 14	0	0	9
VII	frame	0	0	0	23. 43	76.57	7
VIII		0	0	23. 43	75. 42	1. 15	8
IX		0	23.43	75. 42	1. 15	0	9
VII	frame-shear wall	0	0	0	31. 88	68. 12	7
VIII		0	0	31. 88	68. 12	0	8
IX		0	31.88	68. 12	0	0	9
VII	brick-concrete	0	0	8	68. 24	23.76	7
VIII		0	8	68. 24	23. 76	0	8
IX		8	68.24	23. 76	0	0	9
Based on construction time			maybe the sortation based on construction age is not so useful, since the variance of fragility among different building types
VII	1980s	0	0	0.13	0.87	0	7
VIII		0	0.13	0.87	0	0	8
IX		0.13	0.87	0	0	0	9
VII	1990s	0	0	0	0.4906	0.5094	7
VIII		0	0	0.4906	0.5094	0	8
IX		0	0.4906	0.5094	0	0	9
VII	2000s	0	0	0	0.1456	0.8544	7
VIII		0	0	0.1456	0.8431	0.0112	8
IX		0	0.1456	0.8431	0.0112	0	9
Based on different usage
VII	office	0	0	0	0.4708	0.5292	7
VIII		0	0	0.4708	0.5072	0.0221	8
IX		0	0.4708	0.5072	0.0221	0	9
VII	factory	0	0	0.0625	0.9375	0	7
VIII		0	0.0625	0.9375	0	0	8
IX		0.0625	0.9375	0	0	0	9
VII	education	0	0	0.0043	0.3515	0.6442	7
VIII		0	0.0043	0.3515	0.6442	0	8
IX		0.0043	0.3515	0.6442	0	0	9
VII	communication	0	0	0	0.7976	0.2024	7
VIII		0	0	0.7976	0.2024	0	8
IX		0	0.7976	0.2024	0	0	9
VII	hospital	0	0	0.0349	0.2975	0.6676	7
VIII		0	0.0349	0.2975	0.6676	0	8
IX		0.0349	0.2975	0.6676	0	0	9
VII	heat-electricity	0	0	0	0.4936	0.5064	7
VIII		0	0	0.4936	0.4727	0.0337	8
IX		0	0.4936	0.4727	0.0337	0	9
VII	living	0	0	0.3243	0	0.6757	7
VIII		0	0.3243	0	0.6757	0	8
IX		0.3243	0	0.6757	0	0	9

## Sheet: with fortification 16
Model No.	Year	Authors	Research area	EQ location and time	Building type	Analysis method	loss or vulnerability typology		notes	References
1	2012	Meng Ziyang et al.	Hebei, Baoding City		brick-concrete	Yin (1995)	damage ratio		the damage ratios of 5 damage states according to different layers, construction year, usage is also given; the damage ratio is calculated using anti-ductile ability and its empirical relationship with observed damage index	Seismic damage evaluation of the important multi-story brick concrete buildings in Baoding (in Chinese) 保定市典型多层砖混结构震害预测分析 (此外，作者还在2013年地震研究杂志发表另一项保定市房屋震害预测的工作，此处damage ratio由不同震害因子细分不同类别连乘计算得到，但这种定义方法的科学性存疑)
	damage ratio (%)	structure type	collapse	serious damage	medium damge	slight damge	no damage
	VI	brick-concrete	0	0.0124	0.3003	0.3568	0.3305	6
	VII		0	0.0659	0.5706	0.192	0.1715	7
	VIII		0.0125	0.5125	0.3122	0.1234	0.0394	8
	IX		0.0443	0.6582	0.1989	0.0986	0	9
	X		0.2831	0.5414	0.1755	0	0	10
2	2009	He Ping & Fu Guanhua	Guangdong, Zhujiang Delta			statistic data from regional loss management system	damage ratio		the damage ratios of 1-layer dwelling building is the same as those of multi-layer brick-concrete (without fortification); the damage-loss ratios are also given	Preliminary Research of the hazard loss in the city-cluster of Zhujiang Delta (in Chinese) 珠江三角洲城市群震害损失预测初步研究
seismic fortification intensity	damage ratio (%)	structure type	collapse	serious damage	medium damge	slight damge	no damage
VI	VI	multi-layer brick concrete	0.0027	0.021	0.0761	0.2923	0.6079	6
		multi-layer steel-concrete	0	0	0	0.15	0.85	6
	VII	multi-layer brick concrete	0.0155	0.0569	0.1301	0.2711	0.5264	7
		multi-layer steel-concrete	0	0	0.05	0.35	0.6	7
	VIII	multi-layer brick concrete	0.0501	0.1274	0.2189	0.2621	0.3416	8
		multi-layer steel-concrete	0.005	0.025	0.21	0.36	0.4	8
	IX	multi-layer brick concrete	0.1391	0.2322	0.2667	0.2107	0.1512	9
		multi-layer steel-concrete	0.025	0.125	0.28	0.37	0.2	9
	X	multi-layer brick concrete	0.363	0.3315	0.2038	0.0773	0.0243	10
		multi-layer steel-concrete	0.095	0.255	0.395	0.155	0.1	10
VII	VI	multi-layer brick concrete	0.0017	0.0136	0.0542	0.2608	0.6697	6
		multi-layer steel-concrete	0	0	0	0.12	0.88	6
	VII	multi-layer brick concrete	0.0096	0.036	0.0897	0.2311	0.6337	7
		multi-layer steel-concrete	0	0	0.02	0.23	0.75	7
	VIII	multi-layer brick concrete	0.031	0.0825	0.1627	0.2412	0.4825	8
		multi-layer steel-concrete	0.002	0.015	0.103	0.33	0.55	8
	IX	multi-layer brick concrete	0.089	0.1608	0.2339	0.2297	0.2867	9
		multi-layer steel-concrete	0.015	0.075	0.255	0.305	0.35	9
	X	multi-layer brick concrete	0.2506	0.2805	0.2443	0.1404	0.0842	10
		multi-layer steel-concrete	0.075	0.165	0.405	0.205	0.15	10
VIII	VI	multi-layer brick concrete	0.0012	0.0087	0.0356	0.2098	0.7448	6
		multi-layer steel-concrete	0	0	0	0.1	0.9	6
	VII	multi-layer brick concrete	0.0064	0.0223	0.0562	0.1717	0.7434	7
		multi-layer steel-concrete	0	0	0.01	0.14	0.85	7
	VIII	multi-layer brick concrete	0.0196	0.0501	0.1049	0.1855	0.6399	8
		multi-layer steel-concrete	0	0	0.05	0.25	0.7	8
	IX	multi-layer brick concrete	0.0546	0.0992	0.1679	0.1987	0.4796	9
		multi-layer steel-concrete	0.005	0.035	0.145	0.315	0.5	9
	X	multi-layer brick concrete	0.1568	0.1966	0.2249	0.1858	0.2359	10
		multi-layer steel-concrete	0.045	0.105	0.35	0.3	0.2	10
NO	VI	multi-layer brick concrete	0.0182	0.0676	0.1505	0.2715	0.49	6
	VII	multi-layer brick concrete	0.0836	0.2027	0.2207	0.2129	0.28	7
	VIII	multi-layer brick concrete	0.1828	0.3022	0.2309	0.1633	0.12	8
	IX	multi-layer brick concrete	0.3767	0.2608	0.1766	0.1053	0.08	9
	X	multi-layer brick concrete	0.6384	0.1721	0.1191	0.0481	0.022	10
N/A	VI	1-layer dwelling house	0.0182	0.0676	0.1505	0.2715	0.49	6
		others	0.025	0.165	0.225	0.265	0.325	6
	VII	1-layer dwelling house	0.0836	0.2027	0.2207	0.2129	0.28	7
		others	0.19	0.26	0.2	0.185	0.165	7
	VIII	1-layer dwelling house	0.1828	0.3022	0.2309	0.1633	0.12	8
		others	0.375	0.27	0.165	0.12	0.07	8
	IX	1-layer dwelling house	0.3767	0.2608	0.1766	0.1053	0.08	9
		others	0.5	0.25	0.14	0.085	0.025	9
	X	1-layer dwelling house	0.6384	0.1721	0.1191	0.0481	0.022	10
		others	0.735	0.175	0.075	0.015	0	10
damage loss ratio (%)		multi-layer brick concrete	0.85	0.55	0.25	0.08	0.03	damage ratio
		multi-layer steel	0.85	0.55	0.25	0.08	0.03
		1-layer dwelling house	0.8	0.45	0.19	0.06	0.02
		others	0.75	0.41	0.17	0.05	0.02
		indoor property	0.7	0.3	0	0	0
3	2017	Yang Xiaoxin et al.	Yunnan, rural area and urban/town area seperately	80 EQs during 1993-2015	steel frame, brick-concrete, brick-wood, soil-wood	statistic data	damage ratio		This is the most complete statistical damage ratio data in Yunnan province, both for urban/town and rural area	Seismic vulnerability study of buildings in different enforcing zones in Yunnan province (in Chinese) 云南省不同烈度区内房屋建筑震害易损性对比研究
	damage ratio (%)	structure type	collapse	serious damage	medium damge	slight damge	no damage
rural area	VI	steel frame	0	0.001	0.0092	0.1601	0.8317	6
		brick-concrete	0.0003	0.0032	0.0252	0.1942	0.7808	6
		brick-wood	0.0087	0.2407			0.7517	6
		soil-wood	0.0117	0.2771			0.7118	6
	VII	steel frame	0	0.0213	0.0975	0.3304	0.5775	7
		brick-concrete	0.0044	0.0505	0.138	0.3283	0.4849	7
		brick-wood	0.0571	0.5303			0.4126	7
		soil-wood	0.086	0.5375			0.3763	7
	VIII	steel frame	0.0146	0.0902	0.1546	0.3708	0.3847	8
		brick-concrete	0.0242	0.1279	0.3145	0.3547	0.1805	8
		brick-wood	0.2391	0.6563			0.1046	8
		soil-wood	0.2881	0.607			0.1055	8
	IX	steel frame	0.023	0.2022	0.5278	0.2382	0.0088	9
		brick-concrete	0.11	0.3815	0.145	0.1805	0.183	9
		brick-wood	0.53	0.47			0	9
		soil-wood	0.591	0.409			0	9
	≥X	steel frame	0.5778	0.1936	0.1429	0.0857	0	10
		brick-concrete	0.67	0.3	0.03	0	0	10
		brick-wood	N/A
		soil-wood	N/A
urban/town	VI	steel frame	0	0	0.0136	0.1251	0.8662	6
		brick-concrete	0	0.0072	0.0187	0.1329	0.85	6
		brick-wood	0.007	0.1649			0.8328	6
		soil-wood	0.0277	0.166			0.8182	6
	VII	steel frame	0	0	0.0061	0.2014	0.7935	7
		brick-concrete	0	0.0006	0.0132	0.1987	0.7877	7
		brick-wood	0.007	0.2154			0.7789	7
		soil-wood	0.0242	0.2009			0.7749	7
	VIII	steel frame	0.0419	0.0828	0.131	0.3318	0.4126	8
		brick-concrete	0.0591	0.139	0.2161	0.3664	0.2194	8
		brick-wood	0.4261	0.5183			0.0556	8
		soil-wood	0.5872	0.3788			0.0341	8
rural area, with VII fortification	VI	steel frame	0	0.031746	0.174603	0.396825	0.396825	6
		brick-concrete	0.0054	0.019	0.0518	0.2176	0.7615	6
		brick-wood	0.0813953	0.104651	0.290698	0.232558	0.290698	6
		soil-wood	0.0225	0.0093	0.1001	0.2433	0.6915	6
	VII	steel frame	0	0.0411	0.0984	0.3166	0.6006	7
		brick-concrete	0.0123	0.0753	0.1407	0.32	0.479	7
		brick-wood	0.0402	0.0649	0.2816	0.3288	0.4207	7
		soil-wood	0.0392	0.0642	0.2213	0.3495	0.4056	7
	VIII	steel frame	0.0625	0.1875	0.1875	0.3125	0.25	8
		brick-concrete	0.0406	0.1422	0.32	0.3457	0.1963	8
		brick-wood	0.16	0.2	0.24	0.2	0.2	8
		soil-wood	0.1446	0.1901	0.3731	0.3211	0.0563	8
rural area, with VIII fortification	VI	steel frame	0	0	0.021	0.1433	0.8507	6
		brick-concrete	0.0014	0.0091	0.0392	0.1945	0.7932	6
		brick-wood	0.0128	0.0171	0.0665	0.214	0.7466	6
		soil-wood	0.0095	0.0117	0.0939	0.2679	0.661	6
	VII	steel frame	0	0	0.0694	0.3548	0.5873	7
		brick-concrete	0.0184	0.0232	0.155	0.2846	0.5457	7
		brick-wood	0.0123	0.0465	0.1797	0.3532	0.4292	7
		soil-wood	0.006	0.0611	0.2102	0.3497	0.3757	7
	VIII	steel frame	0	0.05	0.26	0.43	0.26	8
		brick-concrete	0.022	0.087	0.364	0.337	0.19	8
		brick-wood	0.0025	0.135	0.365	0.425	0.0725	8
		soil-wood	0.017	0.2143	0.3993	0.296	0.0763	8
4	2017	Wen Heping et al.	Xinjiang, Ulumuqi & Pishan County, Hetian	Ms5.1 EQ in Ulumuqi, 2013; Ms6.5 EQ in Pishan, 2015	earthquake-housing project, steel frame, brick-concrete, brick-wood, soil-wood	site survey	damage ratio		The unfortification and low quality construction is the main cause of damage in these area.	Preliminary analysis on earthquake disaster of building in two destructive earthquakes of Xinjiang (in Chinese) 新疆两次破坏性地震的房屋震害初步分析
	damage ratio (%)	structure type	collapse	serious damage	medium damge	slight damge	no damage
	VI	earthquake-housing project	0	0	0	0.084	0.916	6
		steel frame	0	0	0	0.055	0.945	6
		brick-concrete	0	0.001	0.034	0.072	0.893	6
		brick-wood	0.01	0.022	0.046	0.081	0.841	6
		soil-wood	0.118	0.144	0.188	0.218	0.332	6
	VII	earthquake-housing project	0	0	0.047	0.26	0.693	7
		steel frame	0	0	0	0.112	0.888	7
		brick-concrete	0	0.001	0.031	0.354	0.614	7
		brick-wood	0.051	0.095	0.157	0.244	0.453	7
		soil-wood	0.505	0.176	0.166	0.101	0.052	7
	VIII	earthquake-housing project	0	0.018	0.116	0.52	0.346	8
		steel frame	0	0	0	0.316	0.684	8
		brick-concrete	0	0.044	0.113	0.381	0.462	8
		brick-wood	0.144	0.151	0.176	0.227	0.302	8
		soil-wood	0.681	0.103	0.093	0.085	0.038	8
5	2010	Gao Huiying et al.	Sichuan, Wenchuan		mansory building	collection of site survey data	damage ratio		rural mansory includes: a few type-C fortificated mansory dwelling buildings, a majority of unfortificated type-B dwelling buildings as well as single layer mansory houses; urban/town mansory includes: type-C fortificated houses, unfortificated type-B houses as two-layer dwelling houses.	A research on vulnerability for brick-residence buildings in Wenchuan earthquake areas (in Chinese) 汶川地震区砖砌体住宅房屋易损性研究
	damage ratio (%)	structure type	collapse	serious damage	medium damge	slight damge	no damage
urban/town	VI	mansory	0	1±1	2±1	16.3±13	80.7±11	0
	VII		1±1	9.4±9	14.3±8	28.5±10	46.8±12	0
	VIII		3.3±3	28±13	26.3±10	20.6±9	21.8±11	0
	IX		12.1±9	40.2±10	20.8±8	13.8±7	13.1±8	0
	X		48.5±12	34.7±9	10±8	4.6±2	2.2±1	0
rural area	VI	mansory	0	1.2±1	3.4±2	19.4±11	76±11	0
	VII		5.6±5	14.9±4	25±12	31.5±12	31.1±12	0
	VIII		16.4±11	29.9±12	25.9±9	16.3±11	11.5±8	0
	IX		41.2±13	29±11	18±6	9±7	2.8±2	0
	X		62.7±10	21.4±10	10.2±3	4.1±3	1.6±1	0
6	2013	Piao Yongjun, master thesis	Qinghai, Yunnan	1993-2013 EQs in thesetwo province	soil-wood(A1), brick-wood(A2), Chuandou timber(A＋), unfortificated single/multi-storey mansory(B), fortificated ~(C), steel-concrete,frame(D)	statistics	damage ratio		the fitting curves for each damge state and for each type of building are also given; in this work, high quality pictures of each building type are also given	Study on housing seismic vulnerability of Yunnan and Qinghai province (in Chinese) 云南省青海省房屋地震易损性研究
	damage ratio (%)	structure type	collapse	serious damage	medium damge	slight damge	no damage
general damage ratios for Qinghai-Yunnan	VI	soil-wood	0	0.03	0.13	0.28	0.56	6
	VII		0.05	0.18	0.26	0.31	0.2	7
	VIII		0.22	0.33	0.32	0.08	0.05	8
	IX		0.52	0.28	0.17	0.025	0.005	9
	X		0.9	0.09	0.01	0	0	10
specially in Yunnan, Zhaotong City	VI	soil-wood	0	0.07	0.16	0.27	0.5	6
	VII		0.08	0.22	0.23	0.3	0.17	7
	VIII		0.26	0.37	0.31	0.05	0.01	8
	IX		0.62	0.31	0.07	0	0	9
	X		0.94	0.06	0	0	0	10
Southern Qinghai, pastoral area 牧区	VI	soil-wood	0	0.05	0.16	0.3	0.49	6
	VII		0.07	0.21	0.28	0.33	0.11	7
	VIII		0.31	0.35	0.26	0.06	0.02	8
	IX		0.55	0.3	0.12	0.03	0	9
	X		0.93	0.07	0	0	0	10
general damage ratios for Qinghai-Yunnan	VI	brick-wood	0	0.01	0.08	0.25	0.66	6
	VII		0	0.04	0.26	0.37	0.33	7
	VIII		0.08	0.23	0.34	0.26	0.09	8
	IX		0.21	0.52	0.18	0.09	0	9
	X		0.65	0.26	0.09	0	0	10
specially in Yunnan, Zhaotong City	VI	brick-wood	0.01	0.04	0.11	0.26	0.58	6
	VII		0.03	0.07	0.3	0.33	0.27	7
	VIII		0.12	0.27	0.37	0.21	0.03	8
	IX		0.3	0.55	0.1	0.05	0	9
	X		0.71	0.25	0.04	0	0	10
specially in Qinghai	VI	mansory	0	0	0	0.143	0.857	6
	VII		0	0	0.01	0.32	0.671	7
	VIII		0	0	0.516	0.241	0.242	8
	IX		0.111	0.244	0.489	0.111	0.045	9
	X		0.6	0.4	0	0	0	10
general damage ratios for Yunnan	VI	Chuandou-timber	0	0	0.06	0.21	0.73	6
	VII		0	0.04	0.19	0.32	0.45	7
	VIII		0.01	0.19	0.4	0.33	0.08	8
	IX		0.14	0.44	0.28	0.14	0	9
	X		0.28	0.46	0.25	0.01	0	10
specially in Yunnan, Zhaotong City	VI	Chuandou-timber	0	0	0.08	0.22	0.7	6
	VII		0	0.07	0.22	0.3	0.41	7
	VIII		0.06	0.23	0.44	0.22	0.05	8
	IX		0.17	0.48	0.3	0.05	0	9
	X		0.31	0.49	0.2	0	0	10
specially in Yunnan, Xishuangbanna City	VI	Chuandou-timber	0	0	0.04	0.15	0.81	6
	VII		0	0.02	0.2	0.3	0.48	7
	VIII		0	0.16	0.37	0.35	0.12	8
	IX		0.09	0.41	0.35	0.14	0.01	9
	X		0.22	0.43	0.29	0.06	0	10
general damage ratios for Qinghai-Yunnan	VI	unfortificated brick-concrete	0	0.01	0.03	0.18	0.78	6
	VII		0.01	0.05	0.15	0.33	0.46	7
	VIII		0.06	0.21	0.35	0.28	0.1	8
	IX		0.17	0.52	0.2	0.08	0.03	9
	X		0.52	0.38	0.09	0.01	0	10
specially in Yunnan, Zhaotong City	VI	unfortificated brick-concrete	0	0.02	0.08	0.18	0.72	6
	VII		0.04	0.09	0.21	0.27	0.39	7
	VIII		0.1	0.28	0.33	0.22	0.07	8
	IX		0.22	0.54	0.14	0.09	0.01	9
	X		0.56	0.39	0.05	0	0	10
general damage ratios for Qinghai-Yunnan	VI	high intensity fortificated area, brick-concrete	0	0	0.005	0.125	0.87	6
	VII		0	0.005	0.09	0.225	0.68	7
	VIII		0.01	0.06	0.25	0.38	0.3	8
	IX		0.05	0.33	0.28	0.22	0.12	9
	X		0.27	0.55	0.12	0.04	0.02	10
general damage ratios for Qinghai-Yunnan	VI	low intensity fortificated area, brick-concrete	0	0	0.01	0.14	0.85	6
	VII		0	0.01	0.13	0.36	0.5	7
	VIII		0.02	0.09	0.3	0.37	0.22	8
	IX		0.13	0.42	0.24	0.13	0.08	9
	X		0.35	0.5	0.11	0.03	0.01	10
general damage ratios for Qinghai-Yunnan	VI	high intensity fortificated area, steel-concrete, frame	0	0	0	0.05	0.95	6
	VII		0	0	0.02	0.13	0.85	7
	VIII		0	0.01	0.06	0.43	0.5	8
	IX		0.04	0.18	0.31	0.28	0.19	9
	X		0.2	0.45	0.26	0.07	0.02	10
general damage ratios for Qinghai-Yunnan	VI	low intensity fortificated area, steel-concrete, frame	0	0	0.005	0.06	0.935	6
	VII		0	0	0.04	0.15	0.81	7
	VIII		0	0.02	0.08	0.46	0.44	8
	IX		0.07	0.23	0.28	0.27	0.15	9
	X		0.25	0.55	0.14	0.05	0.01	10
7	2014	Sun Baitao et al.	Sichuan		soil-wood, brick-wood, Chuandou-timber, stone-wood	statistics	damage ratio		the way to divide Sichuan province into different zones according to their population density, economic development level, and structure type is very instructive	Research on zoned characteristics of building sesimic capacity along North South seismic belt--Take Sichuan Province as an example (in Chinese) 南北地震带房屋建筑抗震能力分布特征研究--以四川省为例
	damage ratio (%)	structure type	collapse	serious damage	medium damge	slight damge	no damage
rual area, zone I: in west Sichuan, with low population density, low economic development level; houses are mainly made of wood, mud, stone	VI	soil-wood	0	0.02	0.15	0.28	0.55	6
		brick-wood	0	0.01	0.09	0.27	0.63	6
		Chuandou-timber	0	0	0.05	0.23	0.72	6
		stone-wood	0	0	0.08	0.22	0.7	6
	VII	soil-wood	0.04	0.2	0.25	0.33	0.18	7
		brick-wood	0	0.05	0.29	0.37	0.29	7
		Chuandou-timber	0	0.04	0.21	0.32	0.43	7
		stone-wood	0.06	0.11	0.16	0.37	0.3	7
	VIII	soil-wood	0.2	0.34	0.32	0.1	0.04	8
		brick-wood	0.09	0.25	0.36	0.24	0.06	8
		Chuandou-timber	0.01	0.19	0.39	0.33	0.08	8
		stone-wood	0.25	0.35	0.21	0.1	0.09	8
	IX	soil-wood	0.51	0.28	0.19	0.02	0	9
		brick-wood	0.23	0.51	0.18	0.08	0	9
		Chuandou-timber	0.13	0.45	0.3	0.12	0	9
		stone-wood	0.49	0.35	0.16	0	0	9
	X	soil-wood	0.89	0.105	0.005	0	0	10
		brick-wood	0.66	0.27	0.07	0	0	10
		Chuandou-timber	0.26	0.47	0.26	0.01	0	10
		stone-wood	0.81	0.19	0	0	0	10
rural area, zone II: in middle north of Sichuan, with high pupulation density, high economic development level; houses are generally with VIII or VII fortification	VI	soil-wood	0	0.02	0.12	0.29	0.57	6
		brick-wood	0	0.01	0.08	0.25	0.66	6
		Chuandou-timber	0	0	0.04	0.21	0.75	6
	VII	soil-wood	0.04	0.17	0.25	0.31	0.23	7
		brick-wood	0	0.04	0.26	0.37	0.33	7
		Chuandou-timber	0	0.03	0.19	0.32	0.46	7
	VIII	soil-wood	0.19	0.3	0.33	0.1	0.08	8
		brick-wood	0.08	0.23	0.34	0.26	0.09	8
		Chuandou-timber	0.005	0.175	0.38	0.34	0.1	8
	IX	soil-wood	0.5	0.27	0.19	0.03	0.01	9
		brick-wood	0.21	0.52	0.18	0.09	0	9
		Chuandou-timber	0.11	0.44	0.31	0.14	0	9
	X	soil-wood	0.87	0.1	0.03	0	0	10
		brick-wood	0.65	0.26	0.09	0	0	10
		Chuandou-timber	0.24	0.46	0.3	0	0	10
rural area, zone III: in middle south and east Sichuan, with high population density, middle level economic development; the houses have certain fortification level	VI	soil-wood	0	0.02	0.12	0.29	0.57	6
		brick-wood	0	0.005	0.085	0.24	0.67	6
		Chuandou-timber	0	0	0.05	0.22	0.73	6
	VII	soil-wood	0.04	0.17	0.25	0.31	0.23	7
		brick-wood	0	0.03	0.25	0.38	0.34	7
		Chuandou-timber	0	0.04	0.2	0.31	0.45	7
	VIII	soil-wood	0.19	0.3	0.33	0.1	0.08	8
		brick-wood	0.07	0.24	0.33	0.27	0.09	8
		Chuandou-timber	0.005	0.185	0.39	0.33	0.09	8
	IX	soil-wood	0.5	0.27	0.19	0.03	0.01	9
		brick-wood	0.2	0.53	0.17	0.1	0	9
		Chuandou-timber	0.12	0.44	0.32	0.12	0	9
	X	soil-wood	0.87	0.1	0.03	0	0	10
		brick-wood	0.64	0.26	0.1	0	0	10
		Chuandou-timber	0.25	0.46	0.285	0.005	0	10
VIII,IX high fortification level	VI	high-storey building	0	0	0	0	1	6
	VII		0	0	0	0.05	0.95	7
	VIII		0	0	0.03	0.42	0.55	8
	IX		0	0.02	0.31	0.52	0.15	9
	X		0.05	0.22	0.4	0.28	0.05	10
VI, VII middle fortification level	VI	high-storey building	0	0	0	0	1	6
	VII		0	0	0	0.05	0.95	7
	VIII		0	0	0.05	0.44	0.51	8
	IX		0	0.04	0.37	0.47	0.12	9
	X		0.08	0.25	0.43	0.22	0.02	10
VIII,IX high fortification level	VI	steel-concrete	0	0	0	0.05	0.95	6
	VII		0	0	0.02	0.13	0.85	7
	VIII		0	0.01	0.06	0.43	0.5	8
	IX		0.02	0.14	0.25	0.34	0.25	9
	X		0.2	0.45	0.26	0.07	0.02	10
VI, VII middle fortification level	VI	steel-concrete	0	0	0.005	0.06	0.935	6
	VII		0	0	0.04	0.15	0.81	7
	VIII		0	0.02	0.08	0.46	0.44	8
	IX		0.04	0.2	0.25	0.36	0.15	9
	X		0.25	0.55	0.14	0.05	0.01	10
VIII,IX high fortification level	VI	brick-concrete	0	0	0.005	0.125	0.87	6
	VII		0	0.005	0.09	0.225	0.68	7
	VIII		0.01	0.06	0.25	0.38	0.3	8
	IX		0.05	0.33	0.28	0.22	0.12	9
	X		0.27	0.55	0.12	0.04	0.02	10
VI, VII middle fortification level	VI	brick-concrete	0	0	0.01	0.14	0.85	6
	VII		0	0.01	0.13	0.36	0.5	7
	VIII		0.02	0.09	0.3	0.37	0.22	8
	IX		0.13	0.42	0.24	0.13	0.08	9
	X		0.35	0.5	0.11	0.03	0.01	10
unfortificated houses in early towns, city-village and rural area	VI	brick-concrete	0	0	0.01	0.22	0.77	6
	VII		0	0.04	0.16	0.29	0.51	7
	VIII		0.06	0.2	0.36	0.25	0.13	8
	IX		0.15	0.52	0.2	0.09	0.04	9
	X		0.51	0.4	0.09	0	0	10
8	1995 and 1999	Chen Yong et al.from Yin Zhiqian			RC,industrial plant, old dwelling house,soil-wood	Yin (1995)
	尹之潜, 地震灾害及损失预测方法. 1995: 地震出版社
	陈颙, 陈棋福与陈凌, 地震损失预测评估中的易损性分析. 中国地震, 1999(02): 第4-12页.
	Intensity	structure type	collapse	serious damage	medium damge	slight damge	no damage
	VI	RC	0	0	0	0.12	0.88	6
	VII		0	0	0.02	0.23	0.75	7
	VIII		0	0.02	0.1	0.33	0.55	8
	IX		0.02	0.07	0.26	0.3	0.35	9
	VI	industrial plant	0	0.02	0.07	0.28	0.63	6
	VII		0.01	0.04	0.11	0.27	0.57	7
	VIII		0.04	0.11	0.2	0.26	0.39	8
	IX		0.11	0.2	0.27	0.23	0.19	9
	VI	old dwelling houses	0.01	0.03	0.15	0.32	0.49	6
	VII		0.05	0.1	0.22	0.35	0.28	7
	VIII		0.18	0.3	0.23	0.17	0.12	8
	IX		0.64	0.17	0.12	0.05	0.02	9
	VI	soil-wood	0.02	0.16	0.23	0.27	0.33	6
	VII		0.18	0.2	0.26	0.19	0.17	7
	VIII		0.37	0.27	0.17	0.12	0.07	8
	IX		0.74	0.18	0.07	0.01	0	9
9	1999	Ma Kejian and Chang Yejun			multi-storey mansory	Yin (1995)
	马克俭与常业军, 多层砌体结构房屋震害预测. 合肥工业大学学报(自然科学版), 1999(06): 第58-61+67页.
	Intensity	structure type	collapse	serious damage	medium damge	slight damge	no damage
	VI	multi-storey mansory	0	0.0031	0.0437	0.0884	0.8648	6
	VII		0.019	0.1192	0.3283	0.349	0.1845	7
	VIII		0.0928	0.3517	0.3829	0.1256	0.0416	8
	IX		0.3118	0.4786	0.1951	0.0145	0	9
10	1999	He Jun and Kang Ruiqing			multi-storey mansory	Yin (1995)
	何钧与康瑞清, 山东潍坊地区多层砖房震害预测. 华北地震科学, 1999(01): 第18-28页.
	Intensity	structure type	collapse	serious damage	medium damge	slight damge	no damage
	VI	multi-storey mansory	0	0	0.03	0.17	0.8	6
	VII		0	0.01	0.56	0.33	0.1	7
	VIII		0.04	0.47	0.46	0.03	0	8
	IX		0.48	0.48	0.04	0	0	9
	X		0.93	0.07	0	0	0	10
11	2004	Zhang Fenghua, Xie Lili	张凤华，谢礼立
	城市建构筑物地震损失预测研究
fortification level	Intensity	structure type	collapse	serious damage	medium damge	slight damge	no damage
VI	VI	common building types in the city	0	0‭	0.15‭	0.28‭	0.57	6
	VII		0	‬0.15‭	‬0.28‭	‬0.37‭	0.2	7
	VIII		‬0.15‭	‬0.28‭	‬0.37‭	‬0.15‭	0.05	8
	IX		‬0.28‭	‬0.37‭	‬0.30‭	‬0.05‭	0	9
	X		‬0.37	‬0.30	‬0.33	‬0	0	10
VII	VI	common building types in the city	0	0‭	0‭	0.15‭	0.85	6
	VII		0	‬0‭	‬0. 15‭	‬0.28‭	0.57	7
	VIII		0‭	‬0.15	‬0.28‭	‬0.37‭	0.2	8
	IX		0. 15‭	0.28‭	‬0.37‭	‬0.15‭	0.05	9
	X		0.28	‬0.37	‬0.30	‬0.05	0	10
VIII	VI	common building types in the city	0	0	0	0‭	1.0‭	6
	VII		0	0	0‭	‬0. 15‭	‬0.85‭	7
	VIII		0	0‭	0.15‭	‬0.28‭	‬0.57‭	8
	IX		0‭	0. 15‭	‬0.28‭	‬0.37‭	‬0.20‭	9
	X		0. 15	0.28	‬0.37	‬0. 15	‬0.05	10
IX	VI	common building types in the city	0	0	0	0‭	1.0‭	6
	VII		0	0	0	0‭	‬1.0‭	7
	VIII		0	0	0‭	0. 15	‬0.85‭	8
	IX		0	0‭	0. 15‭	0. 28‭	‬0.57‭	9
	X		0	0. 15	‬0.28	0. 37	‬0.20	10
12	2007	Zhou Guangquan et al.	周广全	Yunnan Province	frame, brick-concrete, brick-wood, soil-wood	statistics	damage ratio
		云南地区房屋建筑的震害矩阵
	EQ Intensity	sturcture type	collapse	serious damage	medium damge	slight damge	no damage
	VI	frame	0	0	0.0132	0.1868	0.8004	6
		brick-concrete	0	0.0017	0.0336	0.2146	0.7496	6
		brick-wood	0.0002	0.0041	0.0488	0.2251	0.7217	6
		soil-wood	0.0001	0.0065	0.0695	0.2584	0.6656	6
	VII	frame	0	0.0158	0.0765	0.3007	0.607	7
		brick-concrete	0.0016	0.0523	0.1413	0.3017	0.503	7
		brick-wood	0.0008	0.0322	0.2133	0.3382	0.4154	7
		soil-wood	0.003	0.0597	0.1971	0.353	0.3871	7
	VIII	frame	0	0.0188	0.0973	0.7717	0.1121	8
		brick-concrete	0.0085	0.1176	0.3835	0.3292	0.1945	8
		brick-wood	0.0121	0.1789	0.365	0.3625	0.1392	8
		soil-wood	0.0417	0.1992	0.3784	0.3117	0.0702	8
	IX	frame	0	0.12	0.33	0.34	0.21	9
		brick-concrete	0.11	0.381	0.145	0.1805	0.183	9
		brick-wood	0.13	0.4	0.28	0.19	0	9
		soil-wood	0.15	0.4415	0.263	0.146	0	9
13	2010	Bie Dongmei et al.	from Wenchuan data for Fujian		urban and rural brick-concrete	statistics
	基于区域特征分区的福建省砖混房屋易损性研究
fortification level	EQ Intensity	sturcture type	collapse	serious damage	medium damge	slight damge	no damage	EQ Intensity
X	VI	brick-concrete in urban area	0	0	0.01	0.073	0.917	6
IX			0	0.005	0.015	0.118	0.862	6
VIII			0	0.01	0.02	0.163	0.807	6
VII			0	0.015	0.025	0.208	0.752	6
VI			0	0.02	0.03	0.253	0.697	6
X	VII	brick-concrete in urban area	0	0.004	0.073	0.385	0.538	7
IX			0.005	0.049	0.108	0.335	0.503	7
VIII			0.01	0.094	0.143	0.285	0.468	7
VII			0.015	0.139	0.178	0.235	0.433	7
VI			0.02	0.184	0.213	0.185	0.398	7
X	VIII	brick-concrete in urban area	0.003	0.21	0.163	0.296	0.328	8
IX			0.018	0.245	0.213	0.251	0.273	8
VIII			0.033	0.28	0.263	0.206	0.218	8
VII			0.048	0.315	0.313	0.161	0.163	8
VI			0.063	0.35	0.363	0.116	0.108	8
X	IX	brick-concrete in urban area	0.051	0.302	0.228	0.208	0.211	9
IX			0.086	0.352	0.218	0.173	0.171	9
VIII			0.121	0.402	0.208	0.138	0.131	9
VII			0.156	0.452	0.198	0.103	0.091	9
VI			0.191	0.502	0.188	0.068	0.051	9
X	X	brick-concrete in urban area	0.365	0.357	0.18	0.066	0.032	10
IX			0.425	0.352	0.14	0.056	0.027	10
VIII			0.485	0.347	0.1	0.046	0.022	10
VII			0.545	0.342	0.06	0.036	0.017	10
VI			0.605	0.337	0.02	0.026	0.012	10
X	VI	brick-concrete in rural area	0	0.002	0.014	0.114	0.87	6
IX			0	0.007	0.024	0.154	0.815	6
VIII			0	0.012	0.034	0.194	0.76	6
VII			0	0.017	0.044	0.234	0.705	6
VI			0	0.022	0.054	0.274	0.65	6
X	VII	brick-concrete in rural area	0.006	0.109	0.115	0.369	0.401	7
IX			0.031	0.129	0.175	0.309	0.356	7
VIII			0.056	0.149	0.235	0.249	0.311	7
VII			0.081	0.169	0.295	0.189	0.266	7
VI			0.106	0.189	0.355	0.129	0.221	7
X	VIII	brick-concrete in rural area	0.144	0.219	0.169	0.273	0.195	8
IX			0.154	0.258	0.215	0.218	0.155	8
VIII			0.164	0.299	0.259	0.163	0.115	8
VII			0.174	0.339	0.304	0.108	0.075	8
VI			0.184	0.379	0.349	0.053	0.035	8
X	IX	brick-concrete in rural area	0.372	0.18	0.24	0.16	0.048	9
IX			0.392	0.235	0.21	0.125	0.038	9
VIII			0.412	0.29	0.18	0.09	0.028	9
VII			0.432	0.345	0.15	0.055	0.018	9
VI			0.452	0.4	0.12	0.02	0.008	9
X	X	brick-concrete in rural area	0.527	0.244	0.132	0.071	0.026	10
IX			0.577	0.229	0.117	0.056	0.021	10
VIII			0.627	0.214	0.102	0.041	0.016	10
VII			0.677	0.199	0.087	0.026	0.011	10
VI			0.727	0.184	0.072	0.011	0.006	10
14	1996	Yin Zhiqian			soil-wood, brick-wood, brick-concrete, RC steel
	Classification of structure vulnerability and evaluating earthquake damage from future earthquake 结构易损性分类和未来地震灾害估计
Fortification level	EQ Intensity	sturcture type	collapse	serious damage	medium damge	slight damge	no damage	EQ Intensity
VII	VI	RC steel	0	0	0	0.12	0.88	6
	VII		0	0	0.02	0.23	0.75	7
	VIII		0.002	0.015	0.103	0.33	0.55	8
	IX		0.015	0.075	0.255	0.305	0.35	9
	X		0.075	0.165	0.405	0.205	0.15	10
VII, Type I area (north than 43°N)	VI	brick-concrete	0.0009	0.0088	0.0409	0.24	0.7093	6
	VII		0.0054	0.0232	0.0662	0.206	0.6992	7
	VIII		0.0186	0.0565	0.1304	0.2256	0.5689	8
	IX		0.0588	0.1202	0.2116	0.2347	0.3747	9
	X		0.1846	0.2477	0.2602	0.1762	0.1313	10
VII, Type II area (within 35°N~43°N)	VI	brick-concrete	0.0012	0.0106	0.0462	0.2491	0.6929	6
	VII		0.0069	0.028	0.0756	0.2171	0.6724	7
	VIII		0.0232	0.0667	0.144	0.2333	0.5328	8
	IX		0.0704	0.1367	0.2222	0.2341	0.3365	9
	X		0.211	0.2627	0.2553	0.1614	0.1096	10
VII, Type III area (south than 35°N)	VI	brick-concrete	0.0017	0.0136	0.0542	0.2608	0.6697	6
	VII		0.0096	0.036	0.0897	0.2311	0.6337	7
	VIII		0.031	0.0825	0.1627	0.2412	0.4825	8
	IX		0.089	0.1608	0.2339	0.2297	0.2867	9
	X		0.2506	0.2805	0.2443	0.1404	0.0842	10
VIII, Type II area (within 35°N~43°N)	VI	brick-concrete	0.0008	0.0067	0.0298	0.1954	0.7673	6
	VII		0.0046	0.0172	0.0464	0.1564	0.7754	7
	VIII		0.0146	0.0398	0.09	0.1721	0.6835	8
	IX		0.0426	0.0822	0.1524	0.191	0.5318	9
	X		0.1289	0.1764	0.2195	0.1952	0.28	10
	VI	brick-wood	0.0182	0.0676	0.1505	0.2715	0.49	6
	VII		0.0836	0.2027	0.2207	0.2129	0.28	7
	VIII		0.1828	0.3022	0.2309	0.1633	0.12	8
	IX		0.3767	0.2608	0.1766	0.1053	0.08	9
	X		0.6384	0.1721	0.1191	0.0481	0.022	10
	VI	soil-wood	0.025	0.165	0.225	0.265	0.325	6
	VII		0.19	0.26	0.2	0.185	0.165	7
	VIII		0.375	0.27	0.165	0.12	0.07	8
	IX		0.5	0.25	0.14	0.085	0.025	9
	X		0.735	0.175	0.075	0.015	0	10
15	2011	Zhang Tiejun	Fujian		urban steel-concrete
	关于影响易损性分析结果的区域因素研究-以福建为例
	Intensity	sturcture type	collapse	serious damage	medium damge	slight damge	no damage
	VI	damge data based on Wenchuan Ms8 earthquake for RC building	0	1.0 ± 1	2.1 ± 2	15.5 ± 10	81.4 ± 13	6
	VII		0	2.8 ± 1	15.3 ± 10	32.4 ± 11	49.5 ± 9	7
	VIII		1.6 ± 1	16.6 ± 7	30.6 ± 10	30.8 ± 12	20.4 ± 4	8
	IX		8.4 ± 4	46.3 ± 7	14.7 ± 6	13.9 ± 4	16. 7 ± 1	9
	X		39.8 ± 6	44.4 ± 5	8.8 ± 2	3.9 ± 1	3.1 ± 1	10
	VI	high fortificated RC	0	0	0.001	0.055	0.944	6
			0	0.005	0.011	0.105	0.879	6
			0	0.01	0.021	0.155	0.814	6
			0	0.015	0.031	0.205	0.749	6
			0	0.02	0.041	0.255	0.684	6
	VII	high- fortificated RC	0	0.018	0.053	0.394	0.535	7
			0	0.023	0.103	0.359	0.515	7
			0	0.028	0.153	0.324	0.495	7
			0	0.033	0.203	0.289	0.475	7
			0	0.038	0.253	0.254	0.455	7
	VIII	middle fortificated RC	0.026	0.096	0.206	0.428	0.244	8
			0.021	0.131	0.256	0.368	0.224	8
			0.016	0.166	0.306	0.308	0.204	8
			0.011	0.201	0.356	0.248	0.184	8
			0.006	0.236	0.406	0.188	0.164	8
	IX	middle- fortificated RC	0.044	0.393	0.207	0.179	0.177	9
			0.064	0.428	0.177	0.159	0.172	9
			0.084	0.463	0.147	0.139	0.167	9
			0.104	0.498	0.117	0.119	0.162	9
			0.124	0.533	0.087	0.099	0.157	9
	X	low fortificated RC	0.338	0.464	0.108	0.049	0.041	10
			0.368	0.454	0.098	0.044	0.036	10
			0.398	0.444	0.088	0.039	0.031	10
			0.428	0.434	0.078	0.034	0.026	10
			0.458	0.424	0.068	0.029	0.021	10
16	2017	Zhang Jian et al.			frame, brick-concrete	烈度差方法值得进一步尝试
		基于烈度差的城市建筑地震易损性评估
	Intensity	sturcture type	collapse	serious damage	medium damge	slight damge	no damage
	VI, Sichuan Derong EQ	VII fortificated frame in Deqin County	0	0	0	0.1581	0.8419	6
		VII fortificated brick-concrete in Deqin County	0	0	0	0.2037	0.7963	6
		VII+ fortificated frame in Shangri-La County	0	0	0	0.0857	0.9143	6
		VII+ fortificated brick-concrete in Shangri-La County	0	0	0.001	0.0967	0.9023	6
	VI, Yunnan Ludian EQ	VII fortificated frame in Ludian County	0	0	0.0339	0.1137	0.8524	6
		VII fortificated brick-concrete in Ludian County	0	0.0369	0.0718	0.0989	0.7924	6
		VIII fortificated frame in Ludian County	0	0	0	0.0414	0.9586	6
		VIII fortificated brick-concrete in Ludian County	0	0	0	0.0711	0.9289	6

## Sheet: analytical prediction 18
Model No.	Year	Authors	Research area	EQ location and time	Building type	Analysis method	loss or vulnerability typology	notes
1	2009	Xia Shan,Master	North China, Northwest China		frame, brick-concrete	Yin (1995)	damage ratio
	Assessment of Seismic Intensity with Mean Damage Index in an Earthquake-resistant Region (in Chinese) 抗震设防地区评定地震烈度的平均震害指数法
	damage ratio (%)	structure type	collapse	serious damage	medium damge	slight damge	no damage
VI fortification	VI	frame	0	0	0	0.15	0.85	6	the anti-EQ analysis for frame structure was conducted in 1990 using the method in Yin(1995)
	VII		0	0	0.05	0.35	0.6	7
	VIII		0.005	0.025	0.21	0.36	0.4	8
	IX		0.025	0.125	0.28	0.37	0.2	9
	X		0.095	0.255	0.395	0.155	0.1	10
VII fortification	VI	frame	0	0	0	0.12	0.88	6
	VII		0	0	0.02	0.23	0.75	7
	VIII		0.002	0.015	0.103	0.33	0.55	8
	IX		0.015	0.075	0.255	0.305	0.35	9
	X		0.075	0.165	0.405	0.205	0.15	10
VIII fortification	VI	frame	0	0	0	0.05	0.95	6
	VII		0	0	0	0.1	0.9	7
	VIII		0	0	0.05	0.15	0.8	8
	IX		0	0.01	0.085	0.355	0.55	9
	X		0.025	0.055	0.27	0.35	0.3	10
Type I area (north than 43°N): VI fortification	VI	brick-concrete	0.0014	0.0133	0.0577	0.2756	0.652	6	the anti-EQ analysis for brick-concrete structure was conducted in 2000 using the method in Yin(1995); the thickness of the outside wall in Type I area (north than 43°N) is around 49cm
	VII		0.0082	0.036	0.0977	0.2527	0.6055	7
	VIII		0.0291	0.0875	0.184	0.2645	0.4349	8
	IX		0.0915	0.1794	0.2633	0.2415	0.2245	9
	X		0.2731	0.3164	0.2488	0.116	0.0457	10
Type I area (north than 43°N): VII fortification	VI	brick-concrete	0.0009	0.0088	0.0409	0.24	0.7093	6
	VII		0.0054	0.0232	0.0662	0.206	0.6992	7
	VIII		0.0186	0.0565	0.1304	0.2256	0.5689	8
	IX		0.0588	0.1202	0.2114	0.2347	0.3747	9
	X		0.1846	0.2477	0.2602	0.1762	0.1313	10
Type I area (north than 43°N): VIII fortification	VI	brick-concrete	0.0007	0.0057	0.0265	0.1862	0.781	6
	VII		0.0037	0.0145	0.0409	0.1467	0.7942	7
	VIII		0.0121	0.0342	0.0812	0.1629	0.7096	8
	IX		0.0362	0.0726	0.1422	0.1847	0.5643	9
	X		0.1133	0.1634	0.2142	0.1994	0.6097	10
Type I area (north than 43°N): IX fortification	VI	brick-concrete	0.0002	0.0018	0.0119	0.1275	0.8587	6
	VII		0.0009	0.0045	0.0166	0.0895	0.8889	7
	VIII		0.0033	0.0117	0.0374	0.1025	0.8452	8
	IX		0.0116	0.029	0.0799	0.1301	0.7494	9
	X		0.0449	0.0881	0.158	0.1942	0.5149	10
Type II area (within 35°N~43°N): VI fortification	VI	brick-concrete	0.001	0.0166	0.0652	0.2836	0.6321	6	the anti-EQ analysis for brick-concrete structure was conducted in 2000 using the method in Yin(1995); the thickness of the outside wall in Type II area (within 35°N~43°N) is around 37cm
	VII		0.0112	0.0449	0.1122	0.262	0.5697	7
	VIII		0.0379	0.105	0.2006	0.2648	0.3917	8
	IX		0.1121	0.2036	0.2666	0.2284	0.1893	9
	X		0.3133	0.3251	0.2289	0.0976	0.035	10
Type II area (within 35°N~43°N): VII fortification	VI	brick-concrete	0.0012	0.0106	0.0462	0.2491	0.6929	6
	VII		0.0069	0.028	0.0756	0.2171	0.6724	7
	VIII		0.0232	0.0667	0.144	0.2333	0.5328	8
	IX		0.0704	0.1367	0.2222	0.2341	0.3365	9
	X		0.211	0.2627	0.2553	0.1614	0.1096	10
Type II area (within 35°N~43°N): VIII fortification	VI	brick-concrete	0.0008	0.0067	0.0298	0.1954	0.7673	6
	VII		0.0046	0.0172	0.0464	0.1564	0.7754	7
	VIII		0.0146	0.0398	0.09	0.1721	0.6835	8
	IX		0.0426	0.0822	0.1524	0.191	0.5318	9
	X		0.1289	0.1764	0.2195	0.1952	0.28	10
Type II area (within 35°N~43°N): IX fortification	VI	brick-concrete	0.0002	0.0021	0.0134	0.1358	0.8485	6
	VII		0.0011	0.0053	0.019	0.0966	0.8781	7
	VIII		0.0039	0.0137	0.0421	0.1109	0.8294	8
	IX		0.0137	0.0332	0.088	0.1391	0.726	9
	X		0.0514	0.0975	0.1681	0.199	0.484	10
Type III area (south than 35°N): VI fortification	VI	brick-concrete	0.0027	0.021	0.0761	0.2923	0.6079	6	the anti-EQ analysis for brick-concrete structure was conducted in 2000 using the method in Yin(1995); the thickness of the outside wall in Type III area (south than 35°N) is around 24cm
	VII		0.0155	0.0569	0.1301	0.2711	0.5264	7
	VIII		0.0501	0.1274	0.2189	0.2621	0.3416	8
	IX		0.1391	0.2322	0.2667	0.2107	0.1512	9
	X		0.363	0.3315	0.2038	0.0773	0.0243	10
Type III area (south than 35°N): VII fortification	VI	brick-concrete	0.0017	0.0136	0.0542	0.2608	0.6697	6
	VII		0.0096	0.036	0.0897	0.2311	0.6337	7
	VIII		0.031	0.0825	0.1627	0.2412	0.4825	8
	IX		0.089	0.1608	0.2339	0.2297	0.2867	9
	X		0.2506	0.2805	0.2443	0.1404	0.0842	10
Type III area (south than 35°N): VIII fortification	VI	brick-concrete	0.0012	0.0087	0.0356	0.2098	0.7448	6
	VII		0.0064	0.0223	0.0562	0.1717	0.7434	7
	VIII		0.0196	0.0501	0.1049	0.1855	0.6399	8
	IX		0.0546	0.0992	0.1679	0.1987	0.4796	9
	X		0.1568	0.1966	0.2249	0.1858	0.2359	10
Type III area (south than 35°N): IX fortification	VI	brick-concrete	0.0002	0.0027	0.0156	0.1466	0.8349	6
	VII		0.0014	0.0066	0.0227	0.1068	0.8625	7
	VIII		0.005	0.0169	0.0492	0.1221	0.8068	8
	IX		0.0171	0.0399	0.0991	0.1502	0.6937	9
	X		0.0618	0.1107	0.1801	0.2025	0.445	10
2	2012	Zeng Zhihua,PhD				DHA, Monte-Carlo	fragility curve
	Fragility Analysis and Seismic Reliability of the Isolated Structure (in Chinese) 隔震体系的易损性分析与地震可靠性安全评定方法
	PGA(g)	structure type	collapse	serious damage	medium damge	slight damge	no damage	PGA(g)
beta d = 0.3	0.025	RC	0	0	0	0		0.025
	0.05		0	0	0.02	0.07		0.05
	0.075		0	0	0.11	0.31		0.075
	0.1		0	0	0.25	0.47		0.1
	0.125		0	0.02	0.33	0.62		0.125
	0.15		0	0.06	0.52	0.7		0.15
	0.175		0	0.1	0.6	0.78		0.175
	0.2		0	0.16	0.65	0.83		0.2
	0.225		0.009	0.27	0.7	0.88		0.225
	0.25		0.027	0.33	0.73	0.92		0.25
	0.275		0.027	0.39	0.78	0.93		0.275
	0.3		0.054	0.44	0.83	0.94		0.3
	0.325		0.063	0.51	0.85	0.96		0.325
	0.35		0.099	0.56	0.88	0.96		0.35
	0.375		0.135	0.6	0.9	0.96		0.375
	0.4		0.153	0.65	0.91	0.97		0.4
	0.425		0.207	0.68	0.92	0.98		0.425
	0.45		0.243	0.72	0.93	0.99		0.45
	0.475		0.324	0.77	0.93	0.99		0.475
	0.5		0.333	0.8	0.95	0.99		0.5
	0.525		0.369	0.81	0.95	0.99		0.525
	0.55		0.378	0.83	0.95	0.99		0.55
	0.575		0.387	0.85	0.96	0.99		0.575
	0.6		0.414	0.86	0.96	0.99		0.6
beta d = 0.7	0.025	RC	0	0	0	0		0.025
	0.05		0	0	0	0.02		0.05
	0.075		0	0	0.03	0.08		0.075
	0.1		0	0	0.08	0.18		0.1
	0.125		0	0	0.15	0.29		0.125
	0.15		0	0.02	0.26	0.38		0.15
	0.175		0	0.03	0.29	0.5		0.175
	0.2		0	0.06	0.38	0.58		0.2
	0.225		0	0.08	0.48	0.64		0.225
	0.25		0	0.1	0.57	0.72		0.25
	0.275		0.01	0.14	0.62	0.72		0.275
	0.3		0.02	0.18	0.66	0.79		0.3
	0.325		0.02	0.23	0.72	0.81		0.325
	0.35		0.03	0.26	0.72	0.84		0.35
	0.375		0.04	0.29	0.75	0.86		0.375
	0.4		0.05	0.31	0.79	0.88		0.4
	0.425		0.06	0.35	0.81	0.91		0.425
	0.45		0.08	0.38	0.83	0.92		0.45
	0.475		0.09	0.44	0.85	0.92		0.475
	0.5		0.1	0.48	0.86	0.92		0.5
	0.525		0.11	0.52	0.89	0.92		0.525
	0.55		0.14	0.54	0.9	0.92		0.55
	0.575		0.16	0.58	0.91	0.93		0.575
	0.6		0.18	0.6	0.92	0.94		0.6
3	2017	Liu Zhongwei, PhD			RC frame with more than 10-storey		fragility curve	The way to fitting the fragility curve is also given in P124
	Study on Seismic Fragility of Tall Reinforced Concrete Structures (in Chinese) 钢筋混凝土高层建筑结构地震易损性分析
	PGA(g)	structure type	collapse	serious damage	medium damge	slight damge	no damage	PGA(g)
	0.05	G10-storey RC frame	0	0	0	0	1	0.05
	0.1		0	0	0	0.0321	0.9679	0.1
	0.15		0	0.0012	0.0095	0.1262	0.8631	0.15
	0.2		0	0.006	0.0345	0.219	0.7405	0.2
	0.3		0.0036	0.0571	0.0679	0.3488	0.5226	0.3
	0.4		0.0155	0.1036	0.125	0.4143	0.3417	0.4
	0.6		0.0905	0.2048	0.1702	0.4417	0.0929	0.6
	0.8		0.1738	0.2679	0.2071	0.3512	0	0.8
	1		0.2667	0.3167	0.2167	0.2	0	1
	1.2		0.3679	0.3333	0.1952	0.1036	0	1.2
	1.4		0.4452	0.3607	0.15	0.044	0	1.4
	1.6		0.5286	0.3464	0.125	0	0	1.6
The period of groud motion within the range of (0,0.3)s	0.05	G10-storey RC frame	0	0	0	0	1	0.05
	0.1		0	0	0	0	1	0.1
	0.15		0	0	0	0.0106	0.9894	0.15
	0.2		0	0	0	0.037	0.963	0.2
	0.3		0	0.0053	0.0053	0.164	0.8254	0.3
	0.4		0	0.0106	0.0265	0.3122	0.6508	0.4
	0.6		0.0053	0.0741	0.0847	0.6243	0.2116	0.6
	0.8		0.0212	0.1323	0.1746	0.672	0	0.8
	1		0.0582	0.2063	0.3016	0.4339	0	1
	1.2		0.1058	0.3069	0.3651	0.2222	0	1.2
	1.4		0.164	0.4286	0.3069	0.1005	0	1.4
	1.6		0.2328	0.4603	0.3069	0	0	1.6
The period of groud motion within the range of [0.3,0.45)s	0.05	G10-storey RC frame	0	0	0	0	1	0.05
	0.1		0	0	0	0.0084	0.9916	0.1
	0.15		0	0	0	0.0378	0.9622	0.15
	0.2		0	0	0.0126	0.0882	0.8992	0.2
	0.3		0	0.0126	0.0252	0.2437	0.7185	0.3
	0.4		0.0042	0.0294	0.0588	0.4286	0.479	0.4
	0.6		0.021	0.0882	0.1639	0.5966	0.1303	0.6
	0.8		0.0546	0.2017	0.2605	0.4832	0	0.8
	1		0.1008	0.3067	0.3109	0.2815	0	1
	1.2		0.1849	0.3866	0.2773	0.1513	0	1.2
	1.4		0.2563	0.4622	0.2185	0.063	0	1.4
	1.6		0.3361	0.5084	0.1555	0	0	1.6
The period of groud motion within the range of [0.45~0.6)s	0.05	G10-storey RC frame	0	0	0	0	1	0.05
	0.1		0	0	0	0.0275	0.9725	0.1
	0.15		0	0	0.0165	0.1209	0.8626	0.15
	0.2		0	0	0.0385	0.3022	0.6593	0.2
	0.3		0	0.0604	0.0604	0.478	0.4011	0.3
	0.4		0.022	0.0.0824	0.1813	0.5165	0.1978	0.4
	0.6		0.0714	0.3187	0.1978	0.3791	0.033	0.6
	0.8		0.1813	0.3736	0.2418	0.2033	0	0.8
	1		0.3462	0.4011	0.1758	0.0769	0	1
	1.2		0.478	0.3736	0.1154	0.033	0	1.2
	1.4		0.5549	0.3681	0.0604	0.0165	0	1.4
	1.6		0.6593	0.322	0.0385	0	0	1.6
The period of groud motion within the range of [0.6~1.2)s	0.05	G10-storey RC frame	0	0	0	0	1	0.05
	0.1		0	0	0	0.0866	0.9134	0.1
	0.15		0	0.0043	0.0216	0.316	0.658	0.15
	0.2		0	0.0216	0.0823	0.4372	0.4589	0.2
	0.3		0.013	0.1429	0.1688	0.5065	0.1688	0.3
	0.4		0.0346	0.2727	0.2294	0.4026	0.0606	0.4
	0.6		0.2468	0.342	0.2251	0.1818	0.0043	0.6
	0.8		0.4156	0.3636	0.1515	0.0693	0	0.8
	1		0.5455	0.3506	0.0823	0.0216	0	1
	1.2		0.684	0.2684	0.0346	0.013	0	1.2
	1.4		0.7835	0.1948	0.0216	0	0	1.4
	1.6		0.8658	0.1212	0.013	0	0	1.6
The overall storey of building is less than 20	0.05	G10-storey RC frame	0	0	0	0	1	0.05
	0.1		0	0	0	0.0458	0.9542	0.1
	0.15		0	0.0021	0.0146	0.1229	0.8604	0.15
	0.2		0	0.0083	0.0292	0.2188	0.7438	0.2
	0.3		0.0063	0.0521	0.0708	0.3167	0.5542	0.3
	0.4		0.0167	0.1021	0.125	0.3792	0.3771	0.4
	0.6		0.0958	0.1917	0.15	0.4625	0.1	0.6
	0.8		0.1813	0.2333	0.2	0.3854	0	0.8
	1		0.2583	0.2917	0.2354	0.2146	0	1
	1.2		0.3375	0.3229	0.2271	0.1125	0	1.2
	1.4		0.4146	0.3813	0.1604	0.0438	0	1.4
	1.6		0.5063	0.3521	0.1417	0	0	1.6
The overall storey of building is more than 20	0.05	G10-storey RC frame	0	0	0	0	1	0.05
	0.1		0	0	0	0.0139	0.9861	0.1
	0.15		0	0	0.0028	0.1306	0.8667	0.15
	0.2		0	0.0028	0.0417	0.2194	0.7361	0.2
	0.3		0	0.0639	0.0639	0.3917	0.4806	0.3
	0.4		0.0139	0.1056	0.125	0.4611	0.2944	0.4
	0.6		0.0833	0.2222	0.1972	0.4139	0.0833	0.6
	0.8		0.1639	0.3139	0.2167	0.3056	0	0.8
	1		0.2778	0.35	0.1917	0.1806	0	1
	1.2		0.4083	0.3472	0.1528	0.0917	0	1.2
	1.4		0.4861	0.3333	0.1361	0.0444	0	1.4
	1.6		0.5583	0.3389	0.1028	0	0	1.6
4	2011	Fang Weihua 方伟华			RC frame, brick-concrete, brick-wood, raw-soil and stone		fragility curve
	PGA(g)	structure type	collapse	serious damage	medium damge	slight damge	no damage	PGA(g)
Type1 fortification level: ＜0.05g	0.1	RC frame	0.001	0.014	0.06	0.24		0.1
	0.2		0.014	0.066	0.24	0.55		0.2
	0.3		0.035	0.152	0.41	0.73		0.3
	0.4		0.07	0.25	0.55	0.83		0.4
	0.5		0.11	0.34	0.65	0.89		0.5
	0.6		0.15	0.42	0.73	0.92		0.6
	0.7		0.2	0.49	0.79	0.95		0.7
	0.8		0.25	0.55	0.83	0.97		0.8
	0.9		0.3	0.61	0.87	0.98		0.9
	1		0.35	0.65	0.89	0.98		1
Type1 fortification level: ＜0.05g	0.1	brick-concrete	0.002	0.041	0.18	0.46		0.1
	0.2		0.038	0.173	0.46	0.77		0.2
	0.3		0.1	0.33	0.65	0.89		0.3
	0.4		0.18	0.47	0.78	0.94		0.4
	0.5		0.26	0.57	0.85	0.97		0.5
	0.6		0.33	0.66	0.89	0.98		0.6
	0.7		0.4	0.72	0.92	0.99		0.7
	0.8		0.48	0.78	0.95	0.99		0.8
	0.9		0.52	0.81	0.96	1		0.9
	1		0.57	0.85	0.97	1		1
Type1 fortification level: ＜0.05g	0.1	brick-wood	0.025	0.084	0.29	0.6		0.1
	0.2		0.122	0.289	0.6	0.86		0.2
	0.3		0.24	0.48	0.77	0.94		0.3
	0.4		0.36	0.62	0.86	0.97		0.4
	0.5		0.47	0.71	0.91	0.98		0.5
	0.6		0.56	0.78	0.94	0.99		0.6
	0.7		0.63	0.83	0.96	0.99		0.7
	0.8		0.69	0.87	0.98	0.99		0.8
	0.9		0.73	0.9	0.98	0.99		0.9
	1		0.78	0.92	0.99	0.99		1
Type1 fortification level: ＜0.05g	0.1	raw-soil and stone	0.063	0.191	0.47	0.76		0.1
	0.2		0.24	0.487	0.77	0.94		0.2
	0.3		0.41	0.67	0.89	0.98		0.3
	0.4		0.55	0.78	0.93	0.99		0.4
	0.5		0.65	0.85	0.96	0.99		0.5
	0.6		0.73	0.89	0.98	1		0.6
	0.7		0.79	0.92	0.99	1		0.7
	0.8		0.84	0.95	0.99	1		0.8
	0.9		0.86	0.96	0.99	1		0.9
	1		0.89	0.97	1	1		1
Type2 fortification level: =0.05g	0.1	RC frame	0.001	0.006	0.03	0.15		0.1
	0.2		0.009	0.035	0.15	0.41		0.2
	0.3		0.022	0.089	0.29	0.6		0.3
	0.4		0.04	0.15	0.41	0.73		0.4
	0.5		0.06	0.22	0.52	0.81		0.5
	0.6		0.09	0.29	0.61	0.86		0.6
	0.7		0.12	0.36	0.68	0.9		0.7
	0.8		0.16	0.41	0.73	0.92		0.8
	0.9		0.19	0.47	0.78	0.94		0.9
	1		0.22	0.52	0.82	0.95		1
Type2 fortification level: =0.05g	0.1	brick-concrete	0.004	0.02	0.1	0.33		0.1
	0.2		0.02	0.104	0.33	0.64		0.2
	0.3		0.06	0.22	0.52	0.8		0.3
	0.4		0.11	0.33	0.64	0.88		0.4
	0.5		0.17	0.43	0.74	0.93		0.5
	0.6		0.22	0.52	0.8	0.95		0.6
	0.7		0.28	0.59	0.85	0.96		0.7
	0.8		0.33	0.65	0.89	0.98		0.8
	0.9		0.39	0.7	0.91	0.98		0.9
	1		0.43	0.75	0.93	0.99		1
Type3 fortification level: =0.10g	0.1	RC frame	0.001	0.01	0.03	0.1		0.1
	0.2		0.01	0.03	0.1	0.32		0.2
	0.3		0.02	0.05	0.21	0.51		0.3
	0.4		0.02	0.1	0.32	0.64		0.4
	0.5		0.04	0.15	0.42	0.73		0.5
	0.6		0.06	0.21	0.51	0.8		0.6
	0.7		0.08	0.26	0.58	0.85		0.7
	0.8		0.09	0.31	0.64	0.88		0.8
	0.9		0.12	0.37	0.69	0.91		0.9
	1		0.15	0.42	0.73	0.92		1
Type3 fortification level: =0.10g	0.1	brick-concrete	0.001	0.01	0.06	0.24		0.1
	0.2		0.005	0.06	0.24	0.55		0.2
	0.3		0.04	0.14	0.41	0.73		0.3
	0.4		0.07	0.24	0.55	0.83		0.4
	0.5		0.1	0.33	0.65	0.89		0.5
	0.6		0.15	0.41	0.73	0.92		0.6
	0.7		0.2	0.48	0.79	0.95		0.7
	0.8		0.24	0.55	0.83	0.96		0.8
	0.9		0.31	0.6	0.87	0.97		0.9
	1		0.33	0.65	0.89	0.98		1
Type4 fortification level: =0.15g	0.1	RC frame	0.001	0.01	0.02	0.07		0.1
	0.2		0.01	0.02	0.07	0.26		0.2
	0.3		0.01	0.04	0.16	0.43		0.3
	0.4		0.02	0.07	0.26	0.56		0.4
	0.5		0.03	0.12	0.36	0.67		0.5
	0.6		0.04	0.17	0.44	0.74		0.6
	0.7		0.06	0.21	0.51	0.8		0.7
	0.8		0.08	0.27	0.57	0.84		0.8
	0.9		0.1	0.31	0.63	0.87		0.9
	1		0.12	0.36	0.67	0.9		1
Type4 fortification level: =0.15g	0.1	brick-concrete	0.01	0.02	0.065	0.18		0.1
	0.2		0.02	0.05	0.18	0.47		0.2
	0.3		0.03	0.11	0.34	0.66		0.3
	0.4		0.05	0.19	0.48	0.78		0.4
	0.5		0.08	0.26	0.57	0.85		0.5
	0.6		0.11	0.34	0.66	0.89		0.6
	0.7		0.14	0.41	0.72	0.92		0.7
	0.8		0.18	0.47	0.78	0.94		0.8
	0.9		0.2	0.52	0.81	0.95		0.9
	1		0.25	0.57	0.85	0.96		1
Type5 fortification level: =0.2g	0.1	RC frame	0.001	0.004	0.015	0.05		0.1
	0.2		0.001	0.009	0.05	0.21		0.2
	0.3		0.01	0.03	0.13	0.37		0.3
	0.4		0.01	0.06	0.22	0.51		0.4
	0.5		0.02	0.09	0.3	0.61		0.5
	0.6		0.02	0.13	0.38	0.7		0.6
	0.7		0.04	0.18	0.45	0.76		0.7
	0.8		0.06	0.21	0.51	0.81		0.8
	0.9		0.07	0.26	0.57	0.84		0.9
	1		0.09	0.31	0.62	0.87		1
Type5 fortification level: =0.2g	0.1	brick-concrete	0.001	0.01	0.03	0.12		0.1
	0.2		0.01	0.03	0.13	0.36		0.2
	0.3		0.02	0.07	0.25	0.55		0.3
	0.4		0.03	0.13	0.36	0.68		0.4
	0.5		0.05	0.19	0.47	0.77		0.5
	0.6		0.08	0.25	0.56	0.83		0.6
	0.7		0.1	0.31	0.63	0.87		0.7
	0.8		0.13	0.37	0.69	0.91		0.8
	0.9		0.16	0.42	0.74	0.93		0.9
	1		0.19	0.47	0.78	0.95		1
Type6 fortification level: =0.3g	0.1	RC frame	0.001	0.001	0.01	0.037		0.1
	0.2		0.002	0.002	0.03	0.17		0.2
	0.3		0.003	0.02	0.09	0.31		0.3
	0.4		0.01	0.04	0.17	0.45		0.4
	0.5		0.01	0.06	0.24	0.55		0.5
	0.6		0.02	0.1	0.32	0.64		0.6
	0.7		0.03	0.13	0.39	0.71		0.7
	0.8		0.04	0.17	0.45	0.76		0.8
	0.9		0.05	0.21	0.5	0.8		0.9
	1		0.06	0.24	0.56	0.83		1
Type6 fortification level: =0.3g	0.1	brick-concrete	0.001	0.01	0.02	0.1		0.1
	0.2		0.01	0.02	0.09	0.31		0.2
	0.3		0.01	0.05	0.2	0.49		0.3
	0.4		0.02	0.1	0.31	0.63		0.4
	0.5		0.04	0.14	0.41	0.72		0.5
	0.6		0.05	0.21	0.49	0.79		0.6
	0.7		0.08	0.25	0.57	0.84		0.7
	0.8		0.1	0.31	0.63	0.88		0.8
	0.9		0.12	0.36	0.68	0.91		0.9
	1		0.15	0.42	0.73	0.92		1
Type7 fortification level: ≥0.4g	0.1	RC frame	0.001	0.002	0.004	0.028		0.1
	0.2		0.002	0.007	0.03	0.13		0.2
	0.3		0.005	0.01	0.07	0.27		0.3
	0.4		0.01	0.03	0.13	0.39		0.4
	0.5		0.01	0.05	0.2	0.49		0.5
	0.6		0.02	0.07	0.27	0.58		0.6
	0.7		0.02	0.1	0.33	0.65		0.7
	0.8		0.03	0.13	0.39	0.71		0.8
	0.9		0.04	0.17	0.45	0.75		0.9
	1		0.05	0.2	0.49	0.79		1
Type7 fortification level: ≥0.4g	0.1	brick-concrete	0.001	0.01	0.02	0.07		0.1
	0.2		0.01	0.02	0.07	0.24		0.2
	0.3		0.01	0.04	0.15	0.42		0.3
	0.4		0.01	0.07	0.24	0.55		0.4
	0.5		0.02	0.11	0.33	0.66		0.5
	0.6		0.04	0.15	0.41	0.73		0.6
	0.7		0.05	0.19	0.49	0.78		0.7
	0.8		0.07	0.24	0.55	0.83		0.8
	0.9		0.09	0.29	0.61	0.87		0.9
	1		0.1	0.33	0.66	0.89		1
5	2014	Liu Juan, Master, P93			fortificated and unfortificated high-storey RC frame-core wall	DHA:动力时程分析法	fragility curve
	Performance-based Seismic design and seismic vulnerability Analysis for isolated high-rise buildings 高层隔震建筑基于性态的抗震设防及地震易损性分析
	PGA(g)	structure type	collapse	serious damage	medium damge	slight damge	no damage	PGA(g)
	0.05	fortificated high-storey RC frame-core wall	0	0.00303951	0.00303951	0.00303951		0.05
	0.1		0.00303951	0.00607903	0.00303951	0.00911854		0.1
	0.15		0.00607903	0.00607903	0.00607903	0.0607903		0.15
	0.2		0.00607903	0.00911854	0.0303951	0.176292		0.2
	0.25		0.00607903	0.00911854	0.0851064	0.337386		0.25
	0.3		0.00607903	0.0212766	0.173252	0.49848		0.3
	0.35		0.00607903	0.0455927	0.267477	0.620061		0.35
	0.4		0.0151976	0.0911854	0.370821	0.729483		0.4
	0.45		0.0243161	0.136778	0.474164	0.808511		0.45
	0.5		0.0455927	0.194529	0.56535	0.863222		0.5
	0.55		0.0699088	0.255319	0.650456	0.902736		0.55
	0.6		0.100304	0.319149	0.714286	0.933131		0.6
	0.65		0.136778	0.382979	0.765957	0.954407		0.65
	0.7		0.173252	0.452888	0.81459	0.966565		0.7
	0.75		0.215805	0.510638	0.851064	0.978723		0.75
	0.8		0.255319	0.568389	0.884498	0.984802		0.8
	0.85		0.303951	0.620061	0.905775	0.990881		0.85
	0.9		0.349544	0.665653	0.927052	0.993921		0.9
	0.05	unfortificated high-storey RC frame-core wall	0.00311526	0.00311526	0.00311526	0.00311526		0.05
	0.1		0.00311526	0.00623053	0.00934579	0.0778816		0.1
	0.15		0.00311526	0.0124611	0.0965732	0.34891		0.15
	0.2		0.00934579	0.0560748	0.280374	0.65109		0.2
	0.25		0.0311526	0.143302	0.482866	0.819315		0.25
	0.3		0.0809969	0.277259	0.666667	0.915888		0.3
	0.35		0.155763	0.423676	0.785047	0.959502		0.35
	0.4		0.252336	0.548287	0.872274	0.978193		0.4
	0.45		0.352025	0.663551	0.919003	0.990654		0.45
	0.5		0.451713	0.750779	0.950156	0.990654		0.5
	0.55		0.548287	0.825545	0.965732	0.990654		0.55
	0.6		0.626168	0.872274	0.978193	0.993769		0.6
	0.65		0.70405	0.909657	0.984424	0.996885		0.65
	0.7		0.766355	0.934579	0.987539	0.996885		0.7
	0.75		0.813084	0.953271	0.990654	0.996885		0.75
	0.8		0.850467	0.965732	0.990654	1		0.8
	0.85		0.884735	0.981308	0.993769	1		0.85
	0.9		0.909657	0.984424	0.993769	1		0.9
6	2014	Liu Yang, Master,P55,57			20-storey RC frame-core wall	IDA:增量动力分析	fragility curve
	Research on Vulnerability of RC frame-core wall hybrid structures subjected to the bidirectional earthquake 高层建筑框架-核心筒混合结构双向地震易损性研究
	PGA(g)	structure type	collapse	serious damage	medium damge	slight damge	no damage	PGA(g)
PGA(g)	0.0512821	20-storey RC frame-core wall	0.00310559	0.00310559	0.00310559	0.00310559		0.0512821
	0.100233		0.00621118	0.00310559	0.00310559	0.425466		0.100233
	0.151515		0.00621118	0.00310559	0.052795	0.953416		0.151515
	0.198135		0.00621118	0.00310559	0.31677	0.990683		0.198135
	0.249417		0.00310559	0.0217391	0.611801	0.990683		0.249417
	0.300699		0.00621118	0.0714286	0.829193	0.990683		0.300699
	0.34965		0.00621118	0.167702	0.934783	0.990683		0.34965
	0.400932		0.00310559	0.301242	0.968944	0.990683		0.400932
	0.449883		0.00621118	0.450311	0.984472	0.990683		0.449883
	0.498834		0.015528	0.580745	0.987578	0.990683		0.498834
	0.550117		0.0310559	0.695652	0.990683	0.990683		0.550117
	0.599068		0.0590062	0.779503	0.993789	0.993789		0.599068
	0.65035		0.0900621	0.841615	0.990683	0.990683		0.65035
	0.701632		0.139752	0.885093	0.990683	0.993789		0.701632
	0.750583		0.189441	0.913043	0.993789	0.990683		0.750583
	0.799534		0.254658	0.934783	0.993789	0.993789		0.799534
	0.848485		0.313665	0.953416	0.993789	0.990683		0.848485
	0.899767		0.378882	0.959627	0.990683	0.990683		0.899767
	0.948718		0.437888	0.968944	0.990683	0.990683		0.948718
	0.997669		0.496894	0.97205	0.993789	0.990683		0.997669
SA(g)	0.0512821	20-storey RC frame box	0.00280899	0	0	0.140449		0.0512821
	0.100233		0.00280899	0.00280899	0.115169	0.75		0.100233
	0.151515		0.00561798	0.0674157	0.410112	0.94382		0.151515
	0.198135		0.00280899	0.176966	0.648876	0.980337		0.198135
	0.249417		0.00561798	0.297753	0.780899	0.991573		0.249417
	0.300699		0.0393258	0.401685	0.856742	0.991573		0.300699
	0.34965		0.103933	0.511236	0.912921	0.991573		0.34965
	0.400932		0.168539	0.620787	0.946629	0.991573		0.400932
	0.449883		0.230337	0.699438	0.963483	0.991573		0.449883
	0.498834		0.300562	0.755618	0.974719	0.994382		0.498834
	0.550117		0.359551	0.800562	0.980337	0.991573		0.550117
	0.599068		0.412921	0.839888	0.985955	0.991573		0.599068
	0.65035		0.466292	0.873596	0.985955	0.994382		0.65035
	0.701632		0.516854	0.901685	0.988764	0.991573		0.701632
	0.750583		0.567416	0.921348	0.991573	0.991573		0.750583
	0.799534		0.609551	0.935393	0.991573	0.991573		0.799534
	0.848485		0.651685	0.946629	0.994382	0.991573		0.848485
	0.899767		0.682584	0.957865	0.994382	0.991573		0.899767
	0.948718		0.710674	0.963483	0.994382	0.991573		0.948718
	0.997669		0.735955	0.969101	0.994382	0.991573		0.997669
7	2016	Sun Longfei, PhD,P70	for buildings in middle and western China		RC frame of different age	IDA:增量动力分析	fragility curve
	Research on the Earthquake disaster loss assessment method for urban areas and system development 城市地震灾害损失评估方法及系统开发研究
	PGA(g)	structure type	collapse	serious damage	medium damge	slight damge	no damage	PGA(g)
newly built	0.0512821	RC frame	0.00881057	0.00881057	0.0132159	0.202643		0.0512821
	0.100233		0.00881057	0.00881057	0.140969	0.647577		0.100233
	0.151515		0.00881057	0.0176211	0.356828	0.859031		0.151515
	0.198135		0.00881057	0.0572687	0.555066	0.942731		0.198135
	0.249417		0.00881057	0.110132	0.700441	0.977974		0.249417
	0.300699		0.00881057	0.189427	0.801762	0.991189		0.300699
	0.34965		0.0176211	0.259912	0.863436	0.995595		0.34965
	0.400932		0.0264317	0.343612	0.911894	0.995595		0.400932
	0.449883		0.0396476	0.414097	0.938326	0.995595		0.449883
	0.498834		0.0572687	0.488987	0.960352	0.995595		0.498834
	0.550117		0.0792952	0.555066	0.969163	0.995595		0.550117
	0.599068		0.101322	0.60793	0.977974	0.995595		0.599068
	0.65035		0.127753	0.656388	0.986784	0.995595		0.65035
	0.701632		0.15859	0.704846	0.986784	0.995595		0.701632
	0.750583		0.185022	0.748899	0.991189	0.995595		0.750583
	0.799534		0.215859	0.779736	0.995595	0.995595		0.799534
	0.848485		0.246696	0.810573	0.995595	0.995595		0.848485
	0.899767		0.281938	0.837004	0.995595	0.995595		0.899767
	0.948718		0.317181	0.859031	0.995595	0.995595		0.948718
	0.997669		0.343612	0.876652	0.995595	0.995595		0.997669
30-year ago	0.0512821	RC frame	0.00687285	0.00684932	0.0137457	0.19244		0.0512821
	0.100233		0.00687285	0.00342466	0.171821	0.701031		0.100233
	0.151515		0.00687285	0.0171233	0.402062	0.90378		0.151515
	0.198135		0.0103093	0.0616438	0.642612	0.969072		0.198135
	0.249417		0.00687285	0.136986	0.786942	0.993127		0.249417
	0.300699		0.0137457	0.226027	0.872852	0.993127		0.300699
	0.34965		0.0206186	0.321918	0.927835	0.993127		0.34965
	0.400932		0.0343643	0.417808	0.962199	0.996564		0.400932
	0.449883		0.0515464	0.506849	0.972509	0.996564		0.449883
	0.498834		0.0790378	0.585616	0.982818	0.996564		0.498834
	0.550117		0.103093	0.65411	0.989691	0.996564		0.550117
	0.599068		0.137457	0.712329	0.993127	0.996564		0.599068
	0.65035		0.175258	0.763699	0.993127	0.996564		0.65035
	0.701632		0.213058	0.80137	0.993127	0.996564		0.701632
	0.750583		0.257732	0.839041	0.993127	0.996564		0.750583
	0.799534		0.302405	0.863014	0.996564	1		0.799534
	0.848485		0.340206	0.886986	0.996564	0.996564		0.848485
	0.899767		0.378007	0.910959	0.996564	0.996564		0.899767
	0.948718		0.42268	0.924658	0.996564	0.996564		0.948718
	0.997669		0.460481	0.938356	0.996564	0.996564		0.997669
40-year ago	0.0512821	RC frame	0.00677966	0.00677966	0.0135593	0.183051		0.0512821
	0.100233		0.00677966	0.0101695	0.162712	0.698305		0.100233
	0.151515		0.00677966	0.020339	0.433898	0.911864		0.151515
	0.198135		0.00677966	0.0711864	0.661017	0.972881		0.198135
	0.249417		0.0101695	0.149153	0.80678	0.989831		0.249417
	0.300699		0.0169492	0.250847	0.898305	0.99322		0.300699
	0.34965		0.0271186	0.355932	0.942373	0.99322		0.34965
	0.400932		0.0474576	0.461017	0.959322	0.99322		0.400932
	0.449883		0.0711864	0.552542	0.979661	0.99322		0.449883
	0.498834		0.105085	0.633898	0.983051	0.99322		0.498834
	0.550117		0.145763	0.698305	0.989831	0.99322		0.550117
	0.599068		0.186441	0.755932	0.989831	0.99661		0.599068
	0.65035		0.237288	0.80339	0.99322	0.99322		0.65035
	0.701632		0.284746	0.850847	0.99322	0.99322		0.701632
	0.750583		0.332203	0.874576	0.99322	0.99322		0.750583
	0.799534		0.376271	0.901695	0.99322	0.99322		0.799534
	0.848485		0.430508	0.918644	0.99661	0.99322		0.848485
	0.899767		0.471186	0.932203	0.99661	0.99661		0.899767
	0.948718		0.508475	0.945763	0.99661	0.99661		0.948718
	0.997669		0.549153	0.955932	0.99661	0.99322		0.997669
50-year ago	0.0512821	RC frame	0.00684932	0.00342466	0.00684932	0.167808		0.0512821
	0.100233		0.00684932	0.00684932	0.150685	0.712329		0.100233
	0.151515		0.00684932	0.0171233	0.44863	0.921233		0.151515
	0.198135		0.00684932	0.0719178	0.674658	0.976027		0.198135
	0.249417		0.010274	0.160959	0.821918	0.986301		0.249417
	0.300699		0.0136986	0.267123	0.900685	0.993151		0.300699
	0.34965		0.0239726	0.386986	0.945205	0.993151		0.34965
	0.400932		0.0376712	0.493151	0.965753	0.993151		0.400932
	0.449883		0.0684932	0.589041	0.979452	0.993151		0.449883
	0.498834		0.10274	0.671233	0.982877	0.993151		0.498834
	0.550117		0.14726	0.732877	0.986301	0.996575		0.550117
	0.599068		0.191781	0.787671	0.986301	0.996575		0.599068
	0.65035		0.236301	0.832192	0.989726	1		0.65035
	0.701632		0.280822	0.863014	0.993151	0.996575		0.701632
	0.750583		0.332192	0.893836	0.989726	1		0.750583
	0.799534		0.390411	0.914384	0.989726	1		0.799534
	0.848485		0.434932	0.931507	0.989726	1		0.848485
	0.899767		0.486301	0.94863	0.993151	0.996575		0.899767
	0.948718		0.527397	0.958904	0.989726	0.996575		0.948718
	0.997669		0.568493	0.965753	0.989726	0.996575		0.997669
8	2017	Yu Xiaohui et al.			8- and 10-storey RC frame	capacity spectrum method
	Sesimic damage assessment of RC frame structures based on vulnerability index 基于易损性指数的钢筋混凝土框架结构地震损伤评估
	SA(g)	structure type	collapse	serious damage	medium damge	slight damge	no damage	SA(g)
Very low fortification level: 0.05g	0.1	8-storey frame	0.00283286	0.00566572	0.0708215	0.974504		0.1
	0.2		0.00283286	0.0396601	0.345609	0.994334		0.2
	0.3		0.0113314	0.121813	0.572238	0.994334		0.3
	0.4		0.0311615	0.232295	0.739377	0.994334		0.4
	0.5		0.0566572	0.348442	0.838527	0.997167		0.5
	0.6		0.0934844	0.456091	0.898017	0.997167		0.6
	0.7		0.141643	0.552408	0.934844	0.997167		0.7
	0.8		0.184136	0.640227	0.957507	0.997167		0.8
	0.9		0.229462	0.708215	0.974504	0.997167		0.9
	1		0.27762	0.759207	0.983003	0.997167		1
	1.1		0.325779	0.804533	0.985836	1		1.1
	1.2		0.368272	0.835694	0.991501	1		1.2
	1.3		0.413598	0.869688	0.994334	0.997167		1.3
	1.4		0.456091	0.889518	0.994334	0.997167		1.4
	1.5		0.492918	0.906516	0.994334	0.997167		1.5
	1.6		0.526912	0.926346	0.994334	0.997167		1.6
	1.7		0.560907	0.94051	0.994334	0.997167		1.7
	1.8		0.594901	0.949008	0.994334	0.997167		1.8
	1.9		0.623229	0.954674	0.997167	0.997167		1.9
	2		0.648725	0.957507	0.997167	0.997167		2
Low fortification level: 0.10g	0.1	8-storey frame	0.00330033	0.00330033	0.039604	0.957096		0.1
	0.2		0.00330033	0.0165017	0.227723	0.993399		0.2
	0.3		0.00660066	0.0726073	0.458746	0.9967		0.3
	0.4		0.0132013	0.161716	0.650165	0.993399		0.4
	0.5		0.0363036	0.257426	0.775578	0.9967		0.5
	0.6		0.0627063	0.363036	0.848185	0.993399		0.6
	0.7		0.0924092	0.462046	0.89769	0.993399		0.7
	0.8		0.125413	0.547855	0.930693	0.9967		0.8
	0.9		0.168317	0.613861	0.950495	0.993399		0.9
	1		0.20462	0.676568	0.963696	0.993399		1
	1.1		0.244224	0.726073	0.973597	0.993399		1.1
	1.2		0.283828	0.768977	0.976898	0.993399		1.2
	1.3		0.323432	0.80198	0.980198	0.993399		1.3
	1.4		0.363036	0.834983	0.983498	0.993399		1.4
	1.5		0.39604	0.858086	0.990099	0.9967		1.5
	1.6		0.429043	0.881188	0.993399	0.993399		1.6
	1.7		0.465347	0.89769	0.9967	0.990099		1.7
	1.8		0.49505	0.917492	0.9967	0.9967		1.8
	1.9		0.528053	0.924092	0.9967	0.9967		1.9
	2		0.554455	0.937294	0.9967	0.9967		2
Medium fortification level: 0.2g	0.125	8-storey frame	0	0.00318471	0.0382166	0.952229		0.125
	0.25		0.00318471	0.0191083	0.251592	0.990446		0.25
	0.375		0.00636943	0.0955414	0.528662	0.990446		0.375
	0.5		0.022293	0.207006	0.729299	0.993631		0.5
	0.625		0.0477707	0.33758	0.843949	0.990446		0.625
	0.75		0.089172	0.464968	0.907643	0.990446		0.75
	0.875		0.136943	0.576433	0.942675	0.996815		0.875
	1		0.187898	0.665605	0.961783	0.993631		1
	1.125		0.242038	0.735669	0.977707	0.993631		1.125
	1.25		0.296178	0.792994	0.984076	0.996815		1.25
	1.375		0.350318	0.83758	0.990446	0.996815		1.375
	1.5		0.404459	0.869427	0.993631	0.996815		1.5
	1.625		0.452229	0.894904	0.993631	0.996815		1.625
	1.75		0.5	0.920382	0.993631	0.996815		1.75
	1.875		0.544586	0.93949	0.993631	0.993631		1.875
	2		0.582803	0.949045	0.996815	0.993631		2
	2.125		0.617834	0.958599	0.993631	0.993631		2.125
	2.25		0.649682	0.964968	0.993631	0.996815		2.25
	2.375		0.678344	0.964968	0.996815	0.993631		2.375
	2.5		0.707006	0.971338	0.996815	0.996815		2.5
High fortification level: 0.3g	0.125	8-storey frame	0.00316456	0.00316456	0.00316456	0.968354		0.125
	0.25		0.00316456	0.00316456	0.123418	0.996835		0.25
	0.375		0.00316456	0.0253165	0.439873	0.996835		0.375
	0.5		0.00632911	0.10443	0.731013	1		0.5
	0.625		0.0221519	0.25	0.879747	1		0.625
	0.75		0.0474684	0.420886	0.949367	0.996835		0.75
	0.875		0.085443	0.572785	0.981013	0.996835		0.875
	1		0.139241	0.699367	0.993671	1		1
	1.125		0.202532	0.797468	0.996835	1		1.125
	1.25		0.272152	0.870253	0.996835	0.996835		1.25
	1.375		0.341772	0.914557	0.996835	0.996835		1.375
	1.5		0.408228	0.939873	0.993671	0.996835		1.5
	1.625		0.474684	0.968354	0.996835	0.996835		1.625
	1.75		0.537975	0.977848	0.996835	0.996835		1.75
	1.875		0.594937	0.987342	0.996835	0.996835		1.875
	2		0.64557	0.993671	0.996835	0.996835		2
	2.125		0.689873	0.996835	0.996835	1		2.125
	2.25		0.734177	0.996835	1	0.996835		2.25
	2.375		0.762658	1	1	0.996835		2.375
	2.5		0.794304	1	0.996835	0.996835		2.5
Very low fortification level: 0.05g	0.1	10-storey frame	0	0.00323625	0.0841424	0.983819		0.1
	0.2		0.00323625	0.038835	0.38835	0.990291		0.2
	0.3		0.00647249	0.12945	0.650485	0.993528		0.3
	0.4		0.0323625	0.262136	0.805825	0.993528		0.4
	0.5		0.0582524	0.398058	0.89644	0.993528		0.5
	0.6		0.0970874	0.517799	0.938511	0.996764		0.6
	0.7		0.142395	0.614887	0.964401	0.996764		0.7
	0.8		0.194175	0.702265	0.977346	0.996764		0.8
	0.9		0.245955	0.763754	0.987055	0.996764		0.9
	1		0.297735	0.815534	0.993528	1		1
	1.1		0.349515	0.857605	0.996764	0.996764		1.1
	1.2		0.391586	0.886731	1	0.996764		1.2
	1.3		0.436893	0.909385	1	1		1.3
	1.4		0.482201	0.925566	0.996764	1		1.4
	1.5		0.521036	0.941748	0.993528	0.996764		1.5
	1.6		0.559871	0.951456	0.996764	0.996764		1.6
	1.7		0.592233	0.961165	0.996764	0.996764		1.7
	1.8		0.624595	0.967638	0.996764	0.996764		1.8
	1.9		0.653722	0.97411	0.996764	0.996764		1.9
	2		0.679612	0.977346	0.996764	0.996764		2
Low fortification level: 0.10g	0.1	10-storey frame	0.00328947	0.00328947	0.0559211	0.983553		0.1
	0.2		0.00657895	0.0328947	0.351974	0.993421		0.2
	0.3		0.00986842	0.111842	0.601974	0.993421		0.3
	0.4		0.0296053	0.230263	0.779605	0.996711		0.4
	0.5		0.0526316	0.365132	0.875	0.996711		0.5
	0.6		0.0888158	0.476974	0.924342	0.996711		0.6
	0.7		0.128289	0.582237	0.960526	0.996711		0.7
	0.8		0.177632	0.667763	0.973684	0.996711		0.8
	0.9		0.223684	0.736842	0.980263	0.996711		0.9
	1		0.273026	0.789474	0.990132	0.996711		1
	1.1		0.322368	0.832237	0.993421	0.996711		1.1
	1.2		0.365132	0.871711	0.996711	0.996711		1.2
	1.3		0.414474	0.894737	0.996711	0.996711		1.3
	1.4		0.457237	0.917763	0.996711	0.996711		1.4
	1.5		0.496711	0.930921	0.996711	0.993421		1.5
	1.6		0.536184	0.944079	0.996711	1		1.6
	1.7		0.569079	0.957237	0.996711	1		1.7
	1.8		0.601974	0.963816	0.996711	0.996711		1.8
	1.9		0.631579	0.970395	0.996711	0.996711		1.9
	2		0.654605	0.970395	0.993421	0.993421		2
Medium fortification level: 0.2g	0.125	10-storey frame	0.00664452	0.00332226	0.0996678	0.0996678		0.125
	0.25		0.00664452	0.0498339	0.451827	0.448505		0.25
	0.375		0.0166113	0.152824	0.697674	0.697674		0.375
	0.5		0.0398671	0.302326	0.833887	0.840532		0.5
	0.625		0.0797342	0.448505	0.916944	0.916944		0.625
	0.75		0.129568	0.574751	0.950166	0.953488		0.75
	0.875		0.182724	0.671096	0.9701	0.9701		0.875
	1		0.232558	0.747508	0.983389	0.983389		1
	1.125		0.295681	0.803987	0.986711	0.986711		1.125
	1.25		0.348837	0.853821	0.993355	0.990033		1.25
	1.375		0.398671	0.883721	0.993355	0.993355		1.375
	1.5		0.448505	0.910299	0.996678	0.996678		1.5
	1.625		0.495017	0.930233	0.996678	0.996678		1.625
	1.75		0.541528	0.946844	0.996678	0.996678		1.75
	1.875		0.581395	0.956811	0.996678	0.996678		1.875
	2		0.61794	0.966777	0.996678	0.996678		2
	2.125		0.651163	0.9701	0.996678	0.996678		2.125
	2.25		0.681063	0.976744	1	1		2.25
	2.375		0.710963	0.980066	0.996678	0.996678		2.375
	2.5		0.730897	0.983389	0.996678	0.996678		2.5
High low fortification level: 0.3g	0.125	10-storey frame	0.00647249	0.00647249	0.00970874	0.983819		0.125
	0.25		0.00647249	0.00647249	0.229773	0.993528		0.25
	0.375		0.00647249	0.0647249	0.550162	0.993528		0.375
	0.5		0.0161812	0.177994	0.750809	0.993528		0.5
	0.625		0.038835	0.323625	0.880259	0.996764		0.625
	0.75		0.0711974	0.459547	0.938511	0.996764		0.75
	0.875		0.116505	0.592233	0.964401	0.996764		0.875
	1		0.171521	0.692557	0.980583	0.996764		1
	1.125		0.226537	0.770227	0.987055	0.996764		1.125
	1.25		0.28479	0.828479	0.993528	0.996764		1.25
	1.375		0.343042	0.873786	0.996764	0.996764		1.375
	1.5		0.398058	0.906149	1	0.996764		1.5
	1.625		0.453074	0.928803	0.996764	0.996764		1.625
	1.75		0.501618	0.94822	0.996764	0.996764		1.75
	1.875		0.550162	0.957929	0.996764	0.996764		1.875
	2		0.598706	0.967638	1	0.996764		2
	2.125		0.634304	0.97411	1	0.996764		2.125
	2.25		0.669903	0.977346	1	0.996764		2.25
	2.375		0.705502	0.983819	0.996764	0.996764		2.375
	2.5		0.728155	0.990291	0.996764	0.993528		2.5
9	2010	Zhujian, PhD			RC frame, frame-shear wall, industrial plant	DHA：动力时程分析法
	Seismic Fragility and Risk Analysis of RC Buildings 钢筋混凝土结构易损性分析与地震风险研究
	PGA(g)	structure type	collapse	serious damage	medium damge	slight damge	no damage	PGA(g)
unfortificated, X direction	0.1	8-storey frame	0	0	0	0.0526316		0.1
	0.2		0.00350877	0	0.333333	0.996491		0.2
	0.3		0.00350877	0	0.982456	0.992982		0.3
	0.4		0	0.0140351	0.996491	0.996491		0.4
	0.5		0	0.294737	0.992982	0.996491		0.5
	0.6		0.00350877	0.726316	0.996491	0.992982		0.6
	0.7		0	0.947368	0.992982	1		0.7
	0.8		0.0140351	0.992982	1	0.996491		0.8
	0.9		0.101754	0.992982	1	0.996491		0.9
	1		0.291228	0.992982	0.996491	0.996491		1
	1.1		0.536842	0.996491	1	0.996491		1.1
	1.2		0.736842	0.996491	1	0.996491		1.2
	1.3		0.877193	0.996491	0.996491	1		1.3
	1.4		0.954386	0.996491	0.996491	1		1.4
	1.5		0.985965	1	1	1		1.5
	1.6		0.992982	0.992982	0.996491	1		1.6
	1.7		0.996491	0.996491	0.996491	1		1.7
	1.8		0.996491	1	0.996491	1		1.8
	1.9		0.996491	1	1	1		1.9
	2		0.996491	0.996491	1	1		2
fortificated, X direction	0.1	8-storey frame	0	0	0	0		0.1
	0.2		0	0	0.0385965	0.894737		0.2
	0.3		0	0	0.785965	0.992982		0.3
	0.4		0	0	0.996491	0.996491		0.4
	0.5		0	0.0245614	0.996491	0.992982		0.5
	0.6		0	0.224561	0.992982	0.992982		0.6
	0.7		0	0.607018	0.996491	0.992982		0.7
	0.8		0	0.873684	0.996491	0.996491		0.8
	0.9		0	0.975439	0.996491	0.996491		0.9
	1		0.0245614	0.992982	1	1		1
	1.1		0.0982456	0.996491	1	1		1.1
	1.2		0.235088	0.996491	1	0.996491		1.2
	1.3		0.421053	0.996491	0.996491	0.996491		1.3
	1.4		0.624561	0.996491	1	1		1.4
	1.5		0.775439	0.996491	0.996491	0.996491		1.5
	1.6		0.880702	0.996491	0.996491	0.996491		1.6
	1.7		0.947368	0.996491	0.996491	0.996491		1.7
	1.8		0.978947	0.996491	0.996491	0.996491		1.8
	1.9		0.989474	0.996491	0.996491	1		1.9
	2		0.996491	0.992982	0.996491	0.996491		2
unfortificated, Y direction	0.1	8-storey frame	0.00520833	0.00260417	0.00520833	0.158854		0.1
	0.2		0.00520833	0.0078125	0.697917	0.994792		0.2
	0.3		0.00520833	0.00520833	0.992188	0.994792		0.3
	0.4		0.0078125	0.148438	0.997396	0.992188		0.4
	0.5		0.00520833	0.669271	0.994792	0.992188		0.5
	0.6		0.0078125	0.950521	0.997396	0.994792		0.6
	0.7		0.0286458	0.994792	0.997396	0.997396		0.7
	0.8		0.145833	0.997396	1	0.997396		0.8
	0.9		0.395833	0.994792	0.997396	0.997396		0.9
	1		0.664062	0.994792	0.997396	0.997396		1
	1.1		0.859375	0.994792	0.997396	0.997396		1.1
	1.2		0.950521	0.997396	0.994792	0.997396		1.2
	1.3		0.984375	0.997396	0.997396	0.997396		1.3
	1.4		0.997396	0.997396	0.997396	0.997396		1.4
	1.5		0.997396	0.992188	0.994792	0.994792		1.5
	1.6		0.997396	0.997396	0.994792	0.997396		1.6
	1.7		0.997396	0.997396	0.997396	0.997396		1.7
	1.8		0.997396	0.997396	0.997396	0.994792		1.8
	1.9		0.997396	0.992188	0.994792	0.992188		1.9
	2		0.997396	0.992188	0.997396	0.994792		2
fortificated, Y direction	0.1	8-storey frame	0.00260417	0.00260417	0.00260417	0.00260417		0.1
	0.2		0.00260417	0.00260417	0.09375	0.966146		0.2
	0.3		0.00260417	0.00520833	0.914062	0.994792		0.3
	0.4		0.00520833	0.00520833	0.992188	0.997396		0.4
	0.5		0.00260417	0.0911458	0.992188	0.994792		0.5
	0.6		0.00260417	0.453125	0.992188	0.997396		0.6
	0.7		0.00520833	0.799479	0.997396	0.997396		0.7
	0.8		0.0078125	0.960938	0.997396	0.994792		0.8
	0.9		0.0234375	0.989583	0.994792	0.997396		0.9
	1		0.0859375	0.992188	0.992188	0.997396		1
	1.1		0.229167	0.994792	0.992188	0.992188		1.1
	1.2		0.445312	0.997396	0.992188	0.994792		1.2
	1.3		0.651042	0.997396	0.992188	0.997396		1.3
	1.4		0.807292	0.997396	0.992188	0.997396		1.4
	1.5		0.914062	0.997396	0.992188	0.992188		1.5
	1.6		0.960938	0.997396	0.997396	0.997396		1.6
	1.7		0.979167	0.997396	0.994792	0.997396		1.7
	1.8		0.984375	0.997396	0.997396	0.997396		1.8
	1.9		0.992188	0.997396	0.994792	0.997396		1.9
	2		0.997396	0.997396	0.994792	0.997396		2
X direction	0.075	fortificated frame structure	0.00506329	0.00253165	0.00506329	0.00506329		0.075
	0.15		0.00253165	0.00506329	0	0.313924		0.15
	0.225		0	0.00253165	0.162025	0.967089		0.225
	0.3		0	0.00506329	0.792405	0.997468		0.3
	0.375		0.00253165	0.00506329	0.982278	0.997468		0.375
	0.45		0.00253165	0.00506329	0.994937	0.994937		0.45
	0.525		0	0.0582278	0.997468	0.994937		0.525
	0.6		0.00253165	0.243038	0.994937	0.997468		0.6
	0.675		0.00506329	0.526582	0.994937	0.994937		0.675
	0.75		0.00506329	0.76962	0.994937	0.994937		0.75
	0.825		0.00253165	0.913924	0.994937	0.997468		0.825
	0.9		0.00253165	0.972152	0.997468	0.997468		0.9
	0.975		0.0202532	0.989873	0.994937	0.997468		0.975
	1.05		0.0607595	0.994937	0.997468	0.997468		1.05
	1.125		0.131646	0.994937	0.997468	0.997468		1.125
	1.2		0.248101	0.997468	0.997468	0.997468		1.2
	1.275		0.389873	0.994937	0.997468	0.994937		1.275
	1.35		0.536709	0.997468	0.997468	0.997468		1.35
	1.425		0.678481	0.997468	1	0.997468		1.425
	1.5		0.779747	0.994937	0.994937	0.997468		1.5
X direction	0.075	frame-shear wall	0.00253165	0.00253165	0.00253165	0.00253165		0.075
	0.15		0.00253165	0.00506329	0	0.131646		0.15
	0.225		0.00506329	0.00506329	0.0455696	0.896203		0.225
	0.3		0.00253165	0.00506329	0.559494	0.992405		0.3
	0.375		0.00253165	0.00506329	0.936709	0.994937		0.375
	0.45		0	0.00506329	0.994937	0.997468		0.45
	0.525		0	0.0151899	0.997468	0.992405		0.525
	0.6		0.00506329	0.0911392	0.997468	0.994937		0.6
	0.675		0.00506329	0.286076	0.994937	0.997468		0.675
	0.75		0.00506329	0.534177	0.994937	0.997468		0.75
	0.825		0.00253165	0.764557	0.994937	0.992405		0.825
	0.9		0.00759494	0.906329	0.997468	0.997468		0.9
	0.975		0.0202532	0.967089	0.997468	0.994937		0.975
	1.05		0.0607595	0.992405	0.997468	0.997468		1.05
	1.125		0.136709	0.997468	0.997468	0.994937		1.125
	1.2		0.24557	0.997468	0.997468	0.992405		1.2
	1.275		0.392405	0.992405	0.997468	0.992405		1.275
	1.35		0.536709	0.997468	0.992405	0.992405		1.35
	1.425		0.673418	1	0.997468	0.992405		1.425
	1.5		0.782278	0.997468	0.997468	0.992405		1.5
Y direction	0.075	fortificated frame structure	0.00178891	0.00357782	0.00357782	0.00178891		0.075
	0.15		0.00536673	0.00357782	0.00178891	0.168157		0.15
	0.225		0.00357782	0.00536673	0.0679785	0.915921		0.225
	0.3		0.00357782	0.00536673	0.615385	0.996422		0.3
	0.375		0.00357782	0.00715564	0.948122	0.996422		0.375
	0.45		0.00357782	0.00536673	0.994633	0.996422		0.45
	0.525		0.00536673	0.019678	0.998211	0.996422		0.525
	0.6		0.00178891	0.118068	0.998211	0.996422		0.6
	0.675		0.00357782	0.322004	0.998211	0.996422		0.675
	0.75		0.00357782	0.588551	0.994633	0.998211		0.75
	0.825		0.00178891	0.792487	0.996422	0.996422		0.825
	0.9		0.00178891	0.91771	0.996422	0.994633		0.9
	0.975		0.00357782	0.969589	0.998211	0.998211		0.975
	1.05		0.0178891	0.994633	0.998211	0.996422		1.05
	1.125		0.0500894	0.996422	0.998211	0.996422		1.125
	1.2		0.100179	0.996422	0.996422	0.996422		1.2
	1.275		0.194991	0.998211	0.994633	0.998211		1.275
	1.35		0.307692	0.994633	0.998211	0.994633		1.35
	1.425		0.443649	0.998211	0.998211	0.996422		1.425
	1.5		0.568873	0.998211	0.998211	0.998211		1.5
Y direction	0.075	frame-shear wall	0.00178891	0.00357782	0.00178891	0.0483005		0.075
	0.15		0.00715564	0.00536673	0.318426	0.985689		0.15
	0.225		0.00536673	0.00536673	0.9678	0.998211		0.225
	0.3		0.00536673	0.0214669	0.996422	0.996422		0.3
	0.375		0.00894454	0.252236	0.998211	0.998211		0.375
	0.45		0.00894454	0.692308	0.998211	0.998211		0.45
	0.525		0.00715564	0.928444	0.998211	0.996422		0.525
	0.6		0.00536673	0.989267	1	1		0.6
	0.675		0.00715564	0.996422	1	0.996422		0.675
	0.75		0.0161002	0.996422	0.994633	0.998211		0.75
	0.825		0.0626118	0.994633	0.998211	0.998211		0.825
	0.9		0.16458	0.996422	0.998211	0.998211		0.9
	0.975		0.322004	0.992844	0.996422	0.998211		0.975
	1.05		0.506261	0.994633	1	0.998211		1.05
	1.125		0.677996	0.994633	0.998211	0.998211		1.125
	1.2		0.810376	0.996422	1	0.994633		1.2
	1.275		0.90161	0.998211	1	0.998211		1.275
	1.35		0.946333	0.996422	1	0.998211		1.35
	1.425		0.973166	0.996422	1	0.998211		1.425
	1.5		0.991055	0.994633	0.998211	0.998211		1.5
	SA(g)	structure type	collapse	serious damage	medium damge	slight damge	no damage	SA(g)
unfortificated, X direction	0.15	4-storey frame	0.00986842	0.00986842	0.00986842	0.00986842		0.15
	0.3		0.00657895	0.00986842	0.0361842	0.799342		0.3
	0.45		0.00657895	0.0131579	0.703947	0.993421		0.45
	0.6		0.00986842	0.00986842	0.993421	0.993421		0.6
	0.75		0.00657895	0.0296053	0.996711	0.993421		0.75
	0.9		0.00328947	0.217105	0.996711	0.996711		0.9
	1.05		0.00328947	0.552632	0.996711	0.993421		1.05
	1.2		0.00328947	0.845395	0.996711	0.996711		1.2
	1.35		0.00328947	0.957237	0.993421	1		1.35
	1.5		0.0230263	0.993421	0.990132	1		1.5
	1.65		0.0822368	0.993421	0.996711	0.996711		1.65
	1.8		0.217105	0.996711	0.996711	1		1.8
	1.95		0.391447	0.996711	1	1		1.95
	2.1		0.575658	0.996711	0.996711	1		2.1
	2.25		0.730263	0.996711	0.996711	0.996711		2.25
	2.4		0.851974	1	0.996711	0.996711		2.4
	2.55		0.917763	0.996711	1	1		2.55
	2.7		0.960526	1	1	0.996711		2.7
	2.85		0.980263	1	0.996711	0.996711		2.85
	3		0.993421	1	0.996711	0.996711		3
fortificated, X direction	0.15	4-storey frame	0.00986842	0.00986842	0.00657895	0.0131579		0.15
	0.3		0.00986842	0.00986842	0.0328947	0.776316		0.3
	0.45		0.00986842	0.0131579	0.555921	0.993421		0.45
	0.6		0.00986842	0.00986842	0.970395	0.993421		0.6
	0.75		0.00986842	0.0131579	0.993421	0.993421		0.75
	0.9		0.00986842	0.118421	0.993421	0.993421		0.9
	1.05		0.00657895	0.401316	0.993421	0.996711		1.05
	1.2		0.00657895	0.720395	0.993421	0.996711		1.2
	1.35		0.00657895	0.914474	0.993421	0.993421		1.35
	1.5		0.00657895	0.976974	0.996711	0.996711		1.5
	1.65		0.0361842	0.990132	0.993421	0.996711		1.65
	1.8		0.111842	0.990132	0.996711	1		1.8
	1.95		0.256579	0.996711	0.996711	0.996711		1.95
	2.1		0.411184	0.993421	0.996711	0.996711		2.1
	2.25		0.585526	0.993421	0.996711	0.996711		2.25
	2.4		0.736842	0.996711	0.993421	0.996711		2.4
	2.55		0.845395	0.996711	0.993421	1		2.55
	2.7		0.917763	0.996711	0.996711	0.996711		2.7
	2.85		0.957237	1	0.993421	0.996711		2.85
	3		0.976974	1	0.993421	1		3
unfortificated, Y direction	0.15	4-storey frame	0.0130719	0.0163399	0.0130719	0.0359477		0.15
	0.3		0.0163399	0.0130719	0.173203	0.944444		0.3
	0.45		0.0163399	0.0130719	0.905229	0.996732		0.45
	0.6		0.0130719	0.0163399	0.993464	0.996732		0.6
	0.75		0.0130719	0.156863	0.996732	0.993464		0.75
	0.9		0.0130719	0.51634	0.996732	0.993464		0.9
	1.05		0.00980392	0.859477	0.996732	0.996732		1.05
	1.2		0.00980392	0.970588	0.996732	1		1.2
	1.35		0.0424837	0.993464	0.996732	0.996732		1.35
	1.5		0.140523	0.993464	0.996732	1		1.5
	1.65		0.310458	0.996732	0.996732	1		1.65
	1.8		0.522876	0.996732	0.996732	1		1.8
	1.95		0.715686	0.996732	0.996732	0.996732		1.95
	2.1		0.852941	0.996732	0.996732	1		2.1
	2.25		0.928105	0.996732	0.996732	1		2.25
	2.4		0.96732	0.993464	0.996732	1		2.4
	2.55		0.98366	0.996732	0.996732	1		2.55
	2.7		0.990196	0.996732	1	1		2.7
	2.85		0.996732	0.996732	1	1		2.85
	3		1	0.993464	1	0.996732		3
fortificated, Y direction	0.15	4-storey frame	0.00980392	0.00980392	0.00980392	0.0130719		0.15
	0.3		0.0130719	0.00980392	0.0228758	0.584967		0.3
	0.45		0.0130719	0.00980392	0.437908	0.996732		0.45
	0.6		0.0130719	0.00980392	0.941176	1		0.6
	0.75		0.0130719	0.00980392	0.993464	0.996732		0.75
	0.9		0.0130719	0.0686275	0.993464	1		0.9
	1.05		0.0130719	0.297386	0.996732	1		1.05
	1.2		0.0130719	0.611111	0.993464	1		1.2
	1.35		0.00980392	0.856209	0.996732	1		1.35
	1.5		0.00980392	0.954248	0.993464	0.996732		1.5
	1.65		0.0196078	0.990196	0.993464	1		1.65
	1.8		0.0555556	0.993464	0.996732	1		1.8
	1.95		0.143791	1	0.996732	1		1.95
	2.1		0.267974	0.996732	0.996732	1		2.1
	2.25		0.428105	0.996732	0.996732	1		2.25
	2.4		0.591503	0.996732	1	0.996732		2.4
	2.55		0.745098	0.996732	0.996732	0.996732		2.55
	2.7		0.852941	0.996732	1	0.996732		2.7
	2.85		0.901961	0.996732	1	0.996732		2.85
	3		0.95098	1	1	0.996732		3
unfortificated, X direction	0.1	6-storey frame	0.00249377	0	0.00249377	0		0.1
	0.2		0	0	0.0249377	0.922693		0.2
	0.3		0.00249377	0	0.765586	0.995012		0.3
	0.4		0.00498753	0.00249377	0.992519	0.997506		0.4
	0.5		0.00249377	0.0149626	0.992519	0.995012		0.5
	0.6		0	0.17207	0.997506	0.997506		0.6
	0.7		0.00249377	0.513716	0.997506	0.997506		0.7
	0.8		0.00249377	0.815461	0.997506	0.997506		0.8
	0.9		0.00249377	0.952618	0.997506	0.997506		0.9
	1		0.0249377	0.990025	0.997506	0.995012		1
	1.1		0.0897756	0.992519	0.997506	0.997506		1.1
	1.2		0.23192	0.995012	0.995012	0.997506		1.2
	1.3		0.408978	0.992519	0.995012	0.995012		1.3
	1.4		0.608479	0.995012	0.995012	0.995012		1.4
	1.5		0.755611	0.992519	0.997506	0.995012		1.5
	1.6		0.870324	0.992519	0.997506	0.995012		1.6
	1.7		0.935162	0.995012	0.995012	0.995012		1.7
	1.8		0.972569	0.997506	0.997506	0.995012		1.8
	1.9		0.987531	1	0.997506	0.995012		1.9
	2		0.995012	1	0.997506	0.997506		2
fortificated, X direction	0.1	6-storey frame	0.00249377	0.00249377	0	0.00249377		0.1
	0.2		0.00498753	0.00249377	0.00249377	0.922693		0.2
	0.3		0.00498753	0.00498753	0.628429	0.997506		0.3
	0.4		0.00249377	0.00498753	0.982544	0.995012		0.4
	0.5		0.00249377	0.00498753	0.992519	0.995012		0.5
	0.6		0.00498753	0.0947631	0.995012	0.995012		0.6
	0.7		0.00498753	0.38404	0.995012	0.995012		0.7
	0.8		0.00498753	0.708229	0.997506	0.995012		0.8
	0.9		0.00498753	0.915212	0.997506	0.997506		0.9
	1		0.00997506	0.977556	0.997506	0.997506		1
	1.1		0.0448878	0.992519	0.997506	0.997506		1.1
	1.2		0.134663	0.997506	0.997506	0.997506		1.2
	1.3		0.289277	0.997506	0.997506	0.997506		1.3
	1.4		0.46384	0.992519	0.995012	0.997506		1.4
	1.5		0.633416	0.997506	0.995012	0.995012		1.5
	1.6		0.778055	0.997506	0.997506	0.997506		1.6
	1.7		0.877805	0.997506	0.995012	0.997506		1.7
	1.8		0.935162	0.997506	0.997506	0.997506		1.8
	1.9		0.967581	0.997506	0.997506	0.997506		1.9
	2		0.985037	0.997506	0.997506	0.997506		2
unfortificated, Y direction	0.1	6-storey frame	0.00411523	0.00411523	0.00411523	0.0144033		0.1
	0.2		0.00617284	0.00617284	0.251029	0.979424		0.2
	0.3		0.00617284	0.00411523	0.958848	0.993827		0.3
	0.4		0.00617284	0.0185185	0.995885	0.995885		0.4
	0.5		0.00823045	0.220165	0.995885	0.995885		0.5
	0.6		0.00617284	0.644033	0.995885	0.997942		0.6
	0.7		0.00205761	0.923868	0.995885	0.995885		0.7
	0.8		0.0123457	0.985597	0.997942	0.995885		0.8
	0.9		0.0761317	0.995885	0.997942	0.997942		0.9
	1		0.226337	0.997942	0.997942	1		1
	1.1		0.427984	0.997942	0.997942	1		1.1
	1.2		0.654321	0.997942	0.997942	0.997942		1.2
	1.3		0.825103	0.997942	0.997942	0.997942		1.3
	1.4		0.915638	0.997942	0.997942	0.997942		1.4
	1.5		0.962963	0.997942	0.997942	0.997942		1.5
	1.6		0.983539	1	0.997942	1		1.6
	1.7		0.993827	1	0.995885	0.997942		1.7
	1.8		0.997942	0.997942	0.997942	1		1.8
	1.9		0.995885	0.997942	0.993827	1		1.9
	2		0.997942	0.997942	0.997942	1		2
fortificated, Y direction	0.1	6-storey frame	0.00205761	0.00205761	0	0.00411523		0.1
	0.2		0.00411523	0.00205761	0.0123457	0.802469		0.2
	0.3		0.00617284	0.00411523	0.641975	0.995885		0.3
	0.4		0.00205761	0.00411523	0.985597	0.997942		0.4
	0.5		0.00411523	0.0144033	0.997942	0.995885		0.5
	0.6		0	0.156379	0.997942	1		0.6
	0.7		0.00411523	0.497942	0.997942	0.997942		0.7
	0.8		0.00617284	0.800412	0.997942	0.995885		0.8
	0.9		0.00411523	0.944444	0.997942	0.997942		0.9
	1		0.0102881	0.985597	1	1		1
	1.1		0.0493827	0.995885	0.997942	0.997942		1.1
	1.2		0.146091	0.995885	0.997942	0.997942		1.2
	1.3		0.290123	0.995885	0.997942	1		1.3
	1.4		0.475309	0.995885	0.993827	1		1.4
	1.5		0.641975	0.995885	0.995885	1		1.5
	1.6		0.779835	0.995885	0.995885	1		1.6
	1.7		0.882716	0.995885	0.997942	1		1.7
	1.8		0.934156	0.99177	0.995885	1		1.8
	1.9		0.969136	0.995885	0.997942	1		1.9
	2		0.981481	1	0.997942	0.997942		2
unfortificated, X direction	0.1	8-storey frame	0.0018797	0.0037594	0.0018797	0.0018797		0.1
	0.2		0.0018797	0.0018797	0.0620301	0.898496		0.2
	0.3		0.0037594	0.0056391	0.81203	0.994361		0.3
	0.4		0.0018797	0.0037594	0.996241	0.994361		0.4
	0.5		0.0018797	0.0394737	0.994361	0.996241		0.5
	0.6		0.0018797	0.295113	0.996241	0.99812		0.6
	0.7		0.0037594	0.672932	0.994361	0.996241		0.7
	0.8		0.0037594	0.896617	0.996241	0.996241		0.8
	0.9		0.0056391	0.979323	0.99812	0.994361		0.9
	1		0.037594	0.994361	0.99812	0.99812		1
	1.1		0.12218	0.994361	0.996241	0.99812		1.1
	1.2		0.274436	0.996241	0.99812	0.996241		1.2
	1.3		0.473684	0.996241	0.994361	0.99812		1.3
	1.4		0.657895	0.996241	0.994361	1		1.4
	1.5		0.796992	0.99812	0.994361	0.99812		1.5
	1.6		0.894737	0.996241	0.996241	0.99812		1.6
	1.7		0.949248	0.996241	0.996241	0.996241		1.7
	1.8		0.973684	0.99812	0.994361	0.99812		1.8
	1.9		0.988722	0.99812	0.996241	0.99812		1.9
	2		0.996241	0.996241	0.996241	0.996241		2
fortificated, X direction	0.1	8-storey frame	0.0018797	0.0018797	0.0037594	0.0018797		0.1
	0.2		0.0037594	0.0018797	0.0056391	0.629699		0.2
	0.3		0.0037594	0.0037594	0.503759	0.996241		0.3
	0.4		0.0037594	0.0037594	0.954887	0.99812		0.4
	0.5		0.0037594	0.0056391	0.992481	0.99812		0.5
	0.6		0.0018797	0.0620301	0.99812	0.996241		0.6
	0.7		0.0056391	0.291353	0.996241	0.996241		0.7
	0.8		0.0037594	0.62218	0.99812	0.996241		0.8
	0.9		0.0056391	0.853383	0.99812	0.99812		0.9
	1		0.0018797	0.962406	1	0.996241		1
	1.1		0.0112782	0.988722	0.99812	0.994361		1.1
	1.2		0.0469925	0.99812	0.99812	0.996241		1.2
	1.3		0.140977	0.996241	0.996241	0.996241		1.3
	1.4		0.278195	0.99812	0.996241	0.996241		1.4
	1.5		0.43797	0.99812	0.994361	0.99812		1.5
	1.6		0.607143	0.99812	0.994361	0.994361		1.6
	1.7		0.742481	0.996241	0.99812	0.996241		1.7
	1.8		0.847744	0.994361	0.99812	0.996241		1.8
	1.9		0.919173	0.994361	0.99812	0.99812		1.9
	2		0.953008	0.996241	1	0.99812		2
unfortificated, Y direction	0.1	8-storey frame	0.00383142	0.00383142	0	0.0344828		0.1
	0.2		0.00383142	0.00574713	0.329502	0.98659		0.2
	0.3		0.00574713	0.00766284	0.977011	0.996169		0.3
	0.4		0.00766284	0.0268199	0.994253	0.992337		0.4
	0.5		0.00574713	0.306513	0.994253	0.996169		0.5
	0.6		0.00574713	0.741379	0.996169	0.996169		0.6
	0.7		0.00766284	0.948276	0.994253	0.998084		0.7
	0.8		0.0268199	0.988506	0.998084	1		0.8
	0.9		0.12069	0.990421	0.994253	1		0.9
	1		0.312261	0.990421	1	1		1
	1.1		0.544061	0.990421	1	1		1.1
	1.2		0.747126	0.990421	1	1		1.2
	1.3		0.87931	0.992337	1	1		1.3
	1.4		0.948276	0.992337	1	1		1.4
	1.5		0.978927	0.990421	1	1		1.5
	1.6		0.988506	0.992337	1	1		1.6
	1.7		0.994253	0.992337	1	1		1.7
	1.8		0.998084	0.992337	1	1		1.8
	1.9		1	0.992337	1	0.998084		1.9
	2		1	0.992337	0.998084	1		2
fortificated, Y direction	0.1	8-storey frame	0	0	0.00191571	0.00383142		0.1
	0.2		0.00766284	0.00191571	0.0191571	0.781609		0.2
	0.3		0.00383142	0.00383142	0.653257	0.996169		0.3
	0.4		0.00191571	0.00383142	0.980843	0.996169		0.4
	0.5		0.00383142	0.0114943	0.992337	1		0.5
	0.6		0.00191571	0.14751	0.994253	1		0.6
	0.7		0.00383142	0.469349	0.994253	0.996169		0.7
	0.8		0.00574713	0.785441	0.994253	1		0.8
	0.9		0.00766284	0.942529	0.998084	0.998084		0.9
	1		0.0114943	0.98659	0.996169	1		1
	1.1		0.0536398	0.992337	0.996169	1		1.1
	1.2		0.141762	0.992337	0.998084	1		1.2
	1.3		0.289272	0.994253	0.998084	1		1.3
	1.4		0.475096	0.998084	0.998084	0.998084		1.4
	1.5		0.649425	0.996169	1	0.998084		1.5
	1.6		0.783525	0.996169	1	1		1.6
	1.7		0.881226	0.996169	0.998084	1		1.7
	1.8		0.938697	0.996169	0.998084	0.998084		1.8
	1.9		0.971264	0.996169	0.998084	0.998084		1.9
	2		0.98659	0.996169	0.996169	0.994253		2
X direction	0.1	fortificated frame structure	0.00372439	0.00744879	0.00744879	0.00744879		0.1
	0.2		0.00558659	0.00372439	0.0614525	0.916201		0.2
	0.3		0.00558659	0.00744879	0.867784	0.994413		0.3
	0.4		0.00744879	0.00931099	0.994413	0.996276		0.4
	0.5		0.00931099	0.0595903	0.998138	0.996276		0.5
	0.6		0.00744879	0.363128	1	0.996276		0.6
	0.7		0.00558659	0.741155	1	0.998138		0.7
	0.8		0.0111732	0.936685	1	0.996276		0.8
	0.9		0.0204842	0.986965	0.998138	0.994413		0.9
	1		0.0689013	0.994413	1	0.994413		1
	1.1		0.188082	0.998138	1	0.990689		1.1
	1.2		0.368715	0.998138	0.998138	0.996276		1.2
	1.3		0.569832	0.998138	0.994413	0.996276		1.3
	1.4		0.756052	0.998138	0.996276	0.998138		1.4
	1.5		0.871508	0.996276	0.998138	0.998138		1.5
	1.6		0.918063	0.992551	1	0.996276		1.6
	1.7		0.962756	0.994413	0.996276	0.998138		1.7
	1.8		0.992551	0.996276	0.996276	0.996276		1.8
	1.9		0.992551	0.998138	0.998138	0.998138		1.9
	2		0.994413	0.996276	0.998138	1		2
X direction	0.1	frame-shear wall	0.00744879	0.00558659	0.00372439	0.00372439		0.1
	0.2		0.00558659	0.00558659	0.00744879	0.214153		0.2
	0.3		0.00931099	0.00744879	0.0986965	0.964618		0.3
	0.4		0.00372439	0.00744879	0.715084	0.996276		0.4
	0.5		0.00931099	0.00744879	0.975791	0.996276		0.5
	0.6		0.00931099	0.00931099	0.994413	0.994413		0.6
	0.7		0.0111732	0.0409683	0.996276	0.994413		0.7
	0.8		0.0111732	0.195531	0.996276	0.998138		0.8
	0.9		0.0111732	0.47486	0.998138	0.998138		0.9
	1		0.00931099	0.739292	0.996276	0.996276		1
	1.1		0.00931099	0.901304	0.996276	0.996276		1.1
	1.2		0.018622	0.968343	0.994413	0.996276		1.2
	1.3		0.0502793	0.990689	0.994413	0.996276		1.3
	1.4		0.113594	0.992551	1	0.998138		1.4
	1.5		0.232775	0.996276	0.998138	0.996276		1.5
	1.6		0.379888	0.996276	1	0.998138		1.6
	1.7		0.532588	0.996276	1	0.996276		1.7
	1.8		0.67784	0.998138	1	0.994413		1.8
	1.9		0.793296	0.996276	1	0.994413		1.9
	2		0.869646	0.998138	1	1		2
Y direction	0.1	fortificated frame structure	0.00368324	0.00736648	0.00184162	0.00368324		0.1
	0.2		0.00368324	0.00368324	0.00184162	0.600368		0.2
	0.3		0.00552486	0.00552486	0.399632	0.994475		0.3
	0.4		0.00736648	0.00552486	0.944751	0.996317		0.4
	0.5		0.00552486	0.00736648	0.998158	0.996317		0.5
	0.6		0.00552486	0.0441989	0.996317	0.996317		0.6
	0.7		0.00552486	0.243094	0.994475	1		0.7
	0.8		0.00368324	0.578269	0.998158	0.996317		0.8
	0.9		0.00552486	0.837937	0.996317	0.994475		0.9
	1		0.00552486	0.952118	0.996317	0.996317		1
	1.1		0.0184162	0.987109	0.998158	1		1.1
	1.2		0.0478821	0.990792	0.998158	0.998158		1.2
	1.3		0.117864	0.992634	0.998158	1		1.3
	1.4		0.246777	0.996317	1	1		1.4
	1.5		0.410681	0.994475	0.996317	1		1.5
	1.6		0.578269	0.994475	1	1		1.6
	1.7		0.723757	0.994475	0.998158	0.998158		1.7
	1.8		0.836096	0.994475	1	0.996317		1.8
	1.9		0.902394	0.998158	0.996317	0.996317		1.9
	2		0.937385	0.996317	0.996317	0.994475		2
Y direction	0.1	frame-shear wall	0.00368324	0.00184162	0.00552486	0.00368324		0.1
	0.2		0.00736648	0.00552486	0.0092081	0.598527		0.2
	0.3		0.00736648	0.00552486	0.445672	0.994475		0.3
	0.4		0.00552486	0.00552486	0.952118	0.998158		0.4
	0.5		0.00368324	0.00736648	0.994475	0.996317		0.5
	0.6		0.00552486	0.0460405	0.994475	0.996317		0.6
	0.7		0.0092081	0.246777	0.992634	0.994475		0.7
	0.8		0.00736648	0.574586	0.994475	0.994475		0.8
	0.9		0.00368324	0.836096	0.994475	0.994475		0.9
	1		0.00552486	0.952118	0.994475	0.996317		1
	1.1		0.00368324	0.985267	0.992634	0.996317		1.1
	1.2		0.00368324	0.990792	0.994475	0.994475		1.2
	1.3		0.00552486	0.990792	0.994475	0.992634		1.3
	1.4		0.0165746	0.992634	0.994475	0.992634		1.4
	1.5		0.0423573	0.990792	0.996317	0.992634		1.5
	1.6		0.0994475	0.98895	0.996317	0.996317		1.6
	1.7		0.184162	0.98895	0.994475	0.992634		1.7
	1.8		0.300184	0.990792	0.996317	0.994475		1.8
	1.9		0.430939	0.990792	0.998158	0.994475		1.9
	2		0.552486	0.998158	1	0.990792		2
X direction	0.15	unfortificated industrial plant	0.00196078	0.00392157	0.00588235	0.0313725		0.15
	0.3		0.00588235	0.00196078	0.045098	0.986275		0.3
	0.45		0.00784314	0.00588235	0.839216	0.996078		0.45
	0.6		0.00588235	0.00392157	0.996078	0.996078		0.6
	0.75		0.00196078	0.0666667	0.996078	0.998039		0.75
	0.9		0.00588235	0.378431	0.994118	0.994118		0.9
	1.05		0.00784314	0.760784	0.994118	0.996078		1.05
	1.2		0.00784314	0.95098	0.998039	0.998039		1.2
	1.35		0.00588235	0.994118	1	0.998039		1.35
	1.5		0.00784314	0.994118	0.998039	1		1.5
	1.65		0.0352941	0.998039	1	1		1.65
	1.8		0.113725	0.998039	1	0.998039		1.8
	1.95		0.25098	0.998039	0.996078	0.998039		1.95
	2.1		0.419608	0.998039	0.994118	0.994118		2.1
	2.25		0.601961	0.996078	0.996078	0.994118		2.25
	2.4		0.75098	0.994118	0.996078	0.994118		2.4
	2.55		0.85098	0.994118	0.996078	0.996078		2.55
	2.7		0.923529	0.996078	0.996078	0.994118		2.7
	2.85		0.956863	0.996078	0.992157	0.996078		2.85
	3		0.978431	0.998039	0.994118	0.994118		3
X direction	0.15	fortificated industrial plant	0.00392157	0.00392157	0.00392157	0.00196078		0.15
	0.3		0.00392157	0.00196078	0.00196078	0.405882		0.3
	0.45		0.00392157	0.00588235	0.0882353	0.992157		0.45
	0.6		0.00588235	0.00588235	0.694118	0.996078		0.6
	0.75		0.00588235	0.00196078	0.970588	0.994118		0.75
	0.9		0.00980392	0.00588235	0.990196	0.998039		0.9
	1.05		0.00784314	0.0117647	0.994118	0.996078		1.05
	1.2		0.00784314	0.0705882	0.992157	0.996078		1.2
	1.35		0.00588235	0.245098	0.994118	0.996078		1.35
	1.5		0.00784314	0.501961	0.996078	0.998039		1.5
	1.65		0.00196078	0.737255	0.998039	0.998039		1.65
	1.8		0.00588235	0.884314	0.996078	0.994118		1.8
	1.95		0.00784314	0.95098	0.996078	0.992157		1.95
	2.1		0.0294118	0.982353	0.998039	1		2.1
	2.25		0.072549	0.992157	0.998039	1		2.25
	2.4		0.152941	0.994118	0.998039	0.996078		2.4
	2.55		0.276471	0.994118	0.998039	0.994118		2.55
	2.7		0.411765	1	0.998039	0.996078		2.7
	2.85		0.55098	0.996078	0.996078	0.994118		2.85
	3		0.67451	0.998039	0.998039	0.996078		3
Y direction	0.15	unfortificated industrial plant	0.00352734	0.00352734	0.00352734	0.195767		0.15
	0.3		0.00352734	0.00529101	0.677249	0.992945		0.3
	0.45		0.00352734	0.00176367	0.996473	0.998236		0.45
	0.6		0.00176367	0.0352734	0.991182	0.998236		0.6
	0.75		0.00352734	0.816578	0.991182	0.998236		0.75
	0.9		0.00352734	0.968254	0.992945	0.996473		0.9
	1.05		0.00176367	0.994709	0.992945	0.998236		1.05
	1.2		0.015873	0.994709	0.996473	0.998236		1.2
	1.35		0.0793651	0.996473	0.996473	1		1.35
	1.5		0.238095	0.998236	0.998236	1		1.5
	1.65		0.45679	0.996473	0.994709	0.994709		1.65
	1.8		0.687831	0.996473	0.996473	0.994709		1.8
	1.95		0.844797	0.996473	0.998236	0.992945		1.95
	2.1		0.934744	0.996473	0.998236	0.992945		2.1
	2.25		0.970018	1	0.998236	0.996473		2.25
	2.4		0.989418	0.998236	0.994709	0.996473		2.4
	2.55		0.996473	0.998236	0.996473	0.998236		2.55
	2.7		0.998236	0.998236	0.996473	0.994709		2.7
	2.85		0.998236	0.996473	0.996473	1		2.85
	3		0.996473		0.998236	0.998236		3
Y direction	0.15	fortificated industrial plant	0.00352734	0.00176367	0	0.021164		0.15
	0.3		0.00352734	0.00352734	0.223986	0.991182		0.3
	0.45		0.00352734	0.00176367	0.964727	0.992945		0.45
	0.6		0.00176367	0.00176367	0.998236	0.994709		0.6
	0.75		0.00352734	0.031746	0.996473	0.994709		0.75
	0.9		0.00352734	0.261023	0.994709	0.994709		0.9
	1.05		0.00176367	0.654321	0.998236	0.994709		1.05
	1.2		0.00352734	0.895944	0.998236	0.996473		1.2
	1.35		0.00176367	0.977072	0.992945	0.996473		1.35
	1.5		0.00352734	0.994709	0.992945	0.996473		1.5
	1.65		0.015873	0.996473	0.998236	0.992945		1.65
	1.8		0.0511464	0.998236	0.994709	0.996473		1.8
	1.95		0.137566	0.996473	0.996473	0.996473		1.95
	2.1		0.291005	0.996473	0.996473	0.992945		2.1
	2.25		0.449735	0.998236	0.998236	0.992945		2.25
	2.4		0.626102	0.998236	0.998236	0.992945		2.4
	2.55		0.768959	0.994709	1	0.994709		2.55
	2.7		0.864198	0.991182	0.996473	0.992945		2.7
	2.85		0.922399	0.992945	0.998236	0.996473		2.85
	3		0.955908	0.992945	0.996473	0.998236		3
10	2015	Zheng Shansuo & Yang Wei			RC core walls	MIDA: 多元增量分析法
	Seismic fragility analysis for RC core walls based on MIDA method 基于多元增量动力分析(MIDA)方法的RC核心筒结构地震易损性分析
	SA(g)	structure type	collapse	serious damage	medium damge	slight damge	no damage	SA(g)
	0.05	RC core walls	0	0.00238095	0.00238095	0		0.05
	0.1		0.00238095	0.00714286	0.00238095	0.0285714		0.1
	0.15		0.00714286	0.00714286	0.0047619	0.5		0.15
	0.2		0.0047619	0.00714286	0	0.961905		0.2
	0.25		0.0047619	0.0047619	0.0190476	0.997619		0.25
	0.3		0	0.00714286	0.097619	1		0.3
	0.35		0.00238095	0.0047619	0.238095	1		0.35
	0.4		0.0047619	0.0119048	0.414286	1		0.4
	0.45		0.0047619	0.0357143	0.585714	0.997619		0.45
	0.5		0.00238095	0.0714286	0.721429	1		0.5
	0.55		0.00238095	0.12619	0.830952	0.997619		0.55
	0.6		0.0119048	0.192857	0.904762	1		0.6
	0.65		0.0214286	0.261905	0.942857	1		0.65
	0.7		0.0333333	0.342857	0.969048	0.997619		0.7
	0.75		0.0547619	0.421429	0.978571	1		0.75
	0.8		0.0761905	0.504762	0.990476	0.997619		0.8
	0.85		0.104762	0.57619	0.997619	0.997619		0.85
	0.9		0.135714	0.642857	0.997619	0.997619		0.9
	0.95		0.180952	0.702381	1	0.997619		0.95
	1		0.209524	0.747619	1	0.997619		1
11	2010	Cui Zhigang & Zhai Yongmei	Zhengzhou New District, Henan Province		multi-storey mansory	Yin (1995)	damage ratio
	多层砌体房屋震害预测分析
	EQ Intensity	structure type	collapse	serious damage	medium damge	slight damge	no damage	EQ Intensity
	VI	multi-storey mansory	0	0	0.043	0.163	0.794	6
	VII		0	0.026	0.147	0.428	0.399	7
	VIII		0.009	0.107	0.389	0.349	0.146	8
12	2010	Zhang Guixin & Sun Baitao	area in the south of 35°N, China		multi-storey mansory	本文提出的群体震害预测法	damage ratio
	EQ Intensity	structure type	collapse	serious damage	medium damge	slight damge	no damage	EQ Intensity
VII fortification level, built before 1978	VI	mansory before 1978	0	0	0.057	0.274	0.669	6
	VII		0	0.047	0.197	0.615	0.141	7
	VIII		0.039	0.198	0.615	0.109	0.039	8
	IX		0.212	0.638	0.113	0.037	0	9
	X		0.772	0.192	0.036	0	0	10
VII fortification level, single-storey building	VI	mansory with single-storey	0	0	0.022	0	0.978	6
	VII		0	0.022	0	0.323	0.655	7
	VIII		0.022	0	0.323	0.519	0.136	8
	IX		0.022	0.323	0.519	0.136	0	9
	X		0.022	0.842	0.136	0	0	10
VII fortification level, usage for living	VI	mansory used for living	0	0	0.019	0.223	0.757	6
	VII		0	0.014	0.139	0.679	0.168	7
	VIII		0.013	0.118	0.683	0.159	0.028	8
	IX		0.128	0.662	0.185	0.025	0	9
	X		0.692	0.265	0.042	0	0	10
simulated damage matrix for Xiamen	VI	mansory	0	0	0.019	0.193	0.788	6
	VII		0	0.012	0.122	0.656	0.21	7
	VIII		0.012	0.099	0.667	0.176	0.046	8
	IX		0.108	0.639	0.208	0.045	0	9
	X		0.653	0.271	0.076	0	0	10
site-surveyed damage matrix in Xiamen	VI	mansory	0	0	0	0.113	0.887	6
	VII		0	0	0.039	0.706	0.256	7
	VIII		0	0.026	0.689	0.242	0.043	8
	IX		0.026	0.73	0.198	0.039	0.007	9
	X		0.681	0.292	0.027	0	0	10
13	2010	Hu Shaoqing & Sun Baitao			usage as living or not	Zhang & Sun (2010), 群体震害预测法	damage ratio
	基于建筑易损性分类的群体震害预测方法研究
	EQ Intensity	structure type	collapse	serious damage	medium damge	slight damge	no damage	EQ Intensity
built during 1979-1989	VI	low-storey building used as living	0	0	0	0	1	6
	VII		0	0	0	0.206	0.794	7
	VIII		0	0	0.206	0.476	0.318	8
	IX		0	0.206	0.476	0.312	0.006	9
	X		0.227	0.514	0.253	0.006	0	10
built during 1979-1989	VI	low-storey building used as non-living	0	0	0	0.013	0.987	6
	VII		0	0	0.012	0.159	0.829	7
	VIII		0	0.023	0.182	0.668	0.127	8
	IX		0.023	0.26	0.605	0.112	0	9
	X		0.38	0.524	0.096	0	0	10
built during 1990-2000	VI	mid-storey building used as living	0	0	0	0.003	0.997	6
	VII		0	0	0.003	0.017	0.98	7
	VIII		0	0.005	0.032	0.462	0.501	8
	IX		0.005	0.058	0.421	0.507	0.009	9
	X		0.118	0.692	0.18	0.01	0	10
built during 1990-2000	VI	mid-storey building used as non-living	0	0	0.003	0.001	0.996	6
	VII		0	0	0.003	0.134	0.863	7
	VIII		0	0.007	0.179	0.649	0.165	8
	IX		0.001	0.233	0.58	0.183	0.003	9
	X		0.302	0.613	0.082	0.003	0	10
built after 2001	VI	mid-storey building used as living	0	0	0	0	1	6
	VII		0	0	0	0.061	0.939	7
	VIII		0	0	0	0.66	0.34	8
	IX		0	0	0.418	0.515	0.067	9
	X		0	0.433	0.5	0.067	0	10
built after 2001	VI	mid-storey building used as non-living	0	0	0	0	1	6
	VII		0	0	0	0.35	0.65	7
	VIII		0	0	0.184	0.581	0.235	8
	IX		0	0.184	0.561	0.255	0	9
	X		0.107	0.426	0.467	0	0	10
simulated damage matrix for Xi'an, Yanliang District	VI	multi-storey RC frame	0	0	0.001	0.001	0.998	6
	VII		0	0	0.002	0.164	0.834	7
	VIII		0	0.004	0.144	0.638	0.214	8
	IX		0.002	0.174	0.577	0.243	0.004	9
	X		0.195	0.55	0.25	0.005	0	10
site-surveyed damage matrix in Xi'an, Yanliang District	VI	multi-storey RC frame	0	0	0	0	1	6
	VII		0	0	0	0.156	0.844	7
	VIII		0	0	0.141	0.732	0.127	8
	IX		0	0.213	0.535	0.252	0	9
	X		0.222	0.521	0.255	0.002	0	10
14	2011	Guo Xiaodong 郭小东			rural wood house	fuzzy method	damage ratio
	村镇木构建筑震害预测方法
	EQ Intensity	structure type	collapse	serious damage	medium damge	slight damge	no damage	EQ Intensity
	VI+	wood house in rural area	0	0	0	0.6299	0.3701	6.5
	VII+		0	0	0.1538	0.5905	0.2557	7.5
	VIII+		0	0.0701	0.31031	0.3839	0.2357	8.5
	IX		0	0.1276	0.3754	0.2944	0.2027	9
	X		0	0.2094	0.3505	0.4401	0	10
15	2010	Liu Jingbo & Liu Yangbing 刘晶波			stee-concrete frame	push-over and 'DHA
	基于性能的方钢管混凝土框架结构地震易损性分析
	PGA(g)	structure type	collapse	serious damage	medium damge	slight damge	no damage	PGA(g)
	0.05	steel-concrete with floor effect （组合梁方钢管混凝土柱框架结构CB-CFST）	0	0	0.00348432	0.0522648		0.05
	0.1		0.00348432	0.00348432	0	0.662021		0.1
	0.15		0.00348432	0.00348432	0.0313589	0.944251		0.15
	0.2		0.00348432	0.00348432	0.139373	0.989547		0.2
	0.25		0.00348432	0	0.341463	0.996516		0.25
	0.3		0.00348432	0.00348432	0.574913	0.996516		0.3
	0.35		0.00348432	0.00696864	0.756098	0.996516		0.35
	0.4		0.00348432	0.0174216	0.874564	1		0.4
	0.45		0.00348432	0.0418118	0.940767	1		0.45
	0.5		0.00696864	0.0766551	0.968641	0.996516		0.5
	0.55		0.0139373	0.12892	0.982578	1		0.55
	0.6		0.0243902	0.198606	0.989547	1		0.6
	0.65		0.0452962	0.285714	0.993031	0.996516		0.65
	0.7		0.0627178	0.365854	0.996516	0.996516		0.7
	0.05	steel-concrete without floor effect （钢梁方钢管混凝土柱框架结构SB-CFST）	0	0	0	0.0278746		0.05
	0.1		0	0	0	0.480836		0.1
	0.15		0	0.00348432	0.0522648	0.843206		0.15
	0.2		0.00348432	0.00348432	0.181185	0.965157		0.2
	0.25		0.00348432	0.00348432	0.372822	0.996516		0.25
	0.3		0.00348432	0.00348432	0.578397	0.996516		0.3
	0.35		0.00348432	0.0174216	0.749129	0.996516		0.35
	0.4		0.00348432	0.0313589	0.850174	0.996516		0.4
	0.45		0.00348432	0.0696864	0.916376	1		0.45
	0.5		0.00696864	0.111498	0.95122	0.996516		0.5
	0.55		0.0174216	0.174216	0.968641	1		0.55
	0.6		0.0243902	0.240418	0.97561	0.996516		0.6
	0.65		0.0418118	0.317073	0.982578	0.996516		0.65
	0.7		0.0627178	0.38676	0.989547	0.996516		0.7
16	2009	Gan Pengxia, Master 甘朋霞			frame and mansory	R-miu-T relationship considered
	抗震设防建筑的易损性及震害指数研究
	PGA(g)	structure type	collapse	serious damage	medium damge	slight damge	no damage	PGA(g)
	0.05	frame in area with fortification level of 0.1g	0.00480769	0.00961538	0.00961538	0.00480769		0.05
	0.1		0.00961538	0.00961538	0.0192308	0.0817308		0.1
	0.15		0.0192308	0.0288462	0.120192	0.274038		0.15
	0.2		0.0192308	0.0673077	0.283654	0.5		0.2
	0.25		0.0192308	0.144231	0.447115	0.663462		0.25
	0.3		0.0192308	0.240385	0.591346	0.783654		0.3
	0.35		0.0144231	0.336538	0.711538	0.865385		0.35
	0.4		0.0192308	0.442308	0.793269	0.913462		0.4
	0.45		0.0192308	0.538462	0.846154	0.942308		0.45
	0.5		0.0240385	0.620192	0.894231	0.961538		0.5
	0.55		0.0288462	0.692308	0.923077	0.971154		0.55
	0.6		0.0432692	0.754808	0.947115	0.980769		0.6
	0.65		0.0625	0.802885	0.951923	0.985577		0.65
	0.7		0.0769231	0.841346	0.961538	0.985577		0.7
	0.75		0.0961538	0.870192	0.971154	0.990385		0.75
	0.8		0.125	0.894231	0.975962	0.990385		0.8
	0.85		0.144231	0.913462	0.980769	0.995192		0.85
	0.9		0.173077	0.927885	0.985577	0.995192		0.9
	0.95		0.206731	0.9375	0.985577	0.995192		0.95
	1		0.240385	0.947115	0.990385	0.995192		1
	1.05		0.264423	0.951923	0.990385	0.995192		1.05
	1.1		0.293269	0.956731	0.985577	0.995192		1.1
	1.15		0.326923	0.961538	0.985577	0.995192		1.15
	1.2		0.360577	0.971154	0.985577	0.995192		1.2
	0.05	frame in area with fortification level of 0.15g	0.00806452	0.00806452	0.00403226	0.00403226		0.05
	0.1		0.00806452	0.00806452	0.0120968	0.0403226		0.1
	0.15		0.00806452	0.00806452	0.0766129	0.193548		0.15
	0.2		0.00806452	0.0282258	0.197581	0.395161		0.2
	0.25		0.00806452	0.0806452	0.350806	0.572581		0.25
	0.3		0.00806452	0.157258	0.491935	0.709677		0.3
	0.35		0.00806452	0.258065	0.612903	0.806452		0.35
	0.4		0.00806452	0.342742	0.709677	0.870968		0.4
	0.45		0.00806452	0.439516	0.790323	0.91129		0.45
	0.5		0.0120968	0.532258	0.842742	0.939516		0.5
	0.55		0.0120968	0.600806	0.887097	0.959677		0.55
	0.6		0.0201613	0.669355	0.919355	0.975806		0.6
	0.65		0.0322581	0.729839	0.935484	0.975806		0.65
	0.7		0.0403226	0.774194	0.955645	0.983871		0.7
	0.75		0.0524194	0.814516	0.959677	0.987903		0.75
	0.8		0.0766129	0.846774	0.967742	0.987903		0.8
	0.85		0.0927419	0.875	0.971774	0.991935		0.85
	0.9		0.112903	0.891129	0.975806	0.995968		0.9
	0.95		0.141129	0.907258	0.979839	0.995968		0.95
	1		0.165323	0.927419	0.987903	1		1
	1.05		0.189516	0.935484	0.991935	1		1.05
	1.1		0.21371	0.943548	0.987903	1		1.1
	1.15		0.245968	0.947581	0.991935	0.995968		1.15
	1.2		0.270161	0.959677	0.991935	1		1.2
	0.05	frame in area with fortification level of 0.2g	0	0.003367	0	0		0.05
	0.1		0.003367	0	0.003367	0.023569		0.1
	0.15		0.00673401	0.00673401	0.0505051	0.141414		0.15
	0.2		0.010101	0.013468	0.148148	0.3367		0.2
	0.25		0.00673401	0.0606061	0.289562	0.518519		0.25
	0.3		0.00673401	0.121212	0.444444	0.6633		0.3
	0.35		0.00673401	0.198653	0.552189	0.760943		0.35
	0.4		0.00673401	0.292929	0.656566	0.838384		0.4
	0.45		0.00673401	0.383838	0.750842	0.902357		0.45
	0.5		0.010101	0.47138	0.814815	0.929293		0.5
	0.55		0.013468	0.552189	0.858586	0.952862		0.55
	0.6		0.013468	0.622896	0.895623	0.96633		0.6
	0.65		0.026936	0.693603	0.929293	0.979798		0.65
	0.7		0.03367	0.737374	0.946128	0.989899		0.7
	0.75		0.040404	0.781145	0.956229	0.989899		0.75
	0.8		0.0606061	0.821549	0.962963	0.989899		0.8
	0.85		0.0740741	0.855219	0.969697	0.996633		0.85
	0.9		0.0875421	0.878788	0.969697	0.996633		0.9
	0.95		0.111111	0.89899	0.973064	0.996633		0.95
	1		0.13468	0.909091	0.976431	0.996633		1
	1.05		0.161616	0.929293	0.976431	0.996633		1.05
	1.1		0.181818	0.942761	0.979798	0.996633		1.1
	1.15		0.205387	0.949495	0.983165	0.996633		1.15
	1.2		0.228956	0.956229	0.979798	1		1.2
	0.05	frame in area with fortification level of 0.3g	0.0112045	0.0112045	0.00840336	0.00560224		0.05
	0.1		0.00840336	0.0112045	0.00560224	0.0112045		0.1
	0.15		0.0112045	0.0112045	0.0140056	0.0532213		0.15
	0.2		0.0112045	0.0140056	0.0504202	0.154062		0.2
	0.25		0.0140056	0.0168067	0.123249	0.268908		0.25
	0.3		0.00840336	0.0364146	0.215686	0.403361		0.3
	0.35		0.0140056	0.0672269	0.313725	0.540616		0.35
	0.4		0.0140056	0.12605	0.428571	0.647059		0.4
	0.45		0.0140056	0.173669	0.52381	0.728291		0.45
	0.5		0.0168067	0.2493	0.605042	0.792717		0.5
	0.55		0.0196078	0.313725	0.683473	0.845938		0.55
	0.6		0.0168067	0.37535	0.747899	0.890756		0.6
	0.65		0.0196078	0.439776	0.789916	0.915966		0.65
	0.7		0.0196078	0.501401	0.829132	0.929972		0.7
	0.75		0.0196078	0.563025	0.862745	0.946779		0.75
	0.8		0.022409	0.610644	0.89916	0.960784		0.8
	0.85		0.0252101	0.661064	0.910364	0.971989		0.85
	0.9		0.0252101	0.703081	0.929972	0.985994		0.9
	0.95		0.0336134	0.736695	0.941176	0.991597		0.95
	1		0.0420168	0.770308	0.955182	0.997199		1
	1.05		0.0504202	0.798319	0.960784	0.997199		1.05
	1.1		0.0560224	0.831933	0.963585	0.997199		1.1
	1.15		0.0728291	0.854342	0.969188	1		1.15
	1.2		0.0812325	0.868347	0.971989	1		1.2
	0.05	frame in area with fortification level of 0.4g	0.00668896	0.00668896	0.00668896	0.00668896		0.05
	0.1		0.00668896	0.00668896	0.00668896	0.00668896		0.1
	0.15		0.00668896	0.00668896	0.00668896	0.00668896		0.15
	0.2		0.00668896	0.00334448	0.00668896	0.0401338		0.2
	0.25		0.00668896	0.00668896	0.0267559	0.09699		0.25
	0.3		0.00668896	0.0100334	0.0668896	0.180602		0.3
	0.35		0.00334448	0.0167224	0.113712	0.274247		0.35
	0.4		0.00668896	0.0334448	0.187291	0.374582		0.4
	0.45		0.00668896	0.0468227	0.257525	0.471572		0.45
	0.5		0.00668896	0.0802676	0.331104	0.555184		0.5
	0.55		0.00668896	0.113712	0.411371	0.628763		0.55
	0.6		0.00668896	0.150502	0.481605	0.692308		0.6
	0.65		0.00668896	0.200669	0.551839	0.752508		0.65
	0.7		0.00668896	0.244147	0.608696	0.792642		0.7
	0.75		0.00668896	0.294314	0.662207	0.832776		0.75
	0.8		0.00668896	0.341137	0.702341	0.862876		0.8
	0.85		0.00668896	0.391304	0.742475	0.889632		0.85
	0.9		0.0100334	0.428094	0.782609	0.916388		0.9
	0.95		0.0100334	0.474916	0.80602	0.926421		0.95
	1		0.0100334	0.51505	0.832776	0.939799		1
	1.05		0.0133779	0.561873	0.856187	0.949833		1.05
	1.1		0.0167224	0.595318	0.882943	0.963211		1.1
	1.15		0.0200669	0.628763	0.896321	0.9699		1.15
	1.2		0.0234114	0.655518	0.909699	0.976589		1.2
	0.05	mansory in area with fortification level of 0.1g	0.00671141	0.0100671	0.0100671	0.0100671		0.05
	0.1		0.00671141	0.00671141	0.0234899	0.201342		0.1
	0.15		0.00671141	0.0302013	0.137584	0.432886		0.15
	0.2		0.0167785	0.0939597	0.265101	0.64094		0.2
	0.25		0.0436242	0.184564	0.416107	0.775168		0.25
	0.3		0.0771812	0.288591	0.540268	0.855705		0.3
	0.35		0.124161	0.385906	0.654362	0.916107		0.35
	0.4		0.191275	0.483221	0.741611	0.949664		0.4
	0.45		0.251678	0.567114	0.802013	0.969799		0.45
	0.5		0.312081	0.64094	0.845638	0.97651		0.5
	0.55		0.379195	0.694631	0.88255	0.989933		0.55
	0.6		0.436242	0.751678	0.912752	0.996644		0.6
	0.65		0.493289	0.795302	0.92953	0.996644		0.65
	0.7		0.543624	0.828859	0.942953	0.996644		0.7
	0.75		0.597315	0.862416	0.963087	0.996644		0.75
	0.8		0.634228	0.885906	0.966443	0.996644		0.8
	0.85		0.681208	0.902685	0.973154	0.996644		0.85
	0.9		0.708054	0.922819	0.973154	0.996644		0.9
	0.95		0.744966	0.932886	0.979866	0.996644		0.95
	1		0.775168	0.939597	0.989933	0.996644		1
	1.05		0.802013	0.95302	0.993289	0.996644		1.05
	1.1		0.825503	0.963087	0.993289	0.996644		1.1
	1.15		0.838926	0.963087	0.996644	0.996644		1.15
	1.2		0.855705	0.963087	0.996644	0.996644		1.2
	0.05	mansory in area with fortification level of 0.15g	0	0	0	0		0.05
	0.1		0.00350877	0	0	0.0385965		0.1
	0.15		0	0	0.0140351	0.168421		0.15
	0.2		0	0.0140351	0.0807018	0.336842		0.2
	0.25		0	0.0421053	0.168421	0.498246		0.25
	0.3		0.00701754	0.0877193	0.259649	0.638596		0.3
	0.35		0.0210526	0.147368	0.357895	0.729825		0.35
	0.4		0.0491228	0.210526	0.45614	0.807018		0.4
	0.45		0.0666667	0.280702	0.54386	0.863158		0.45
	0.5		0.101754	0.34386	0.617544	0.901754		0.5
	0.55		0.136842	0.414035	0.687719	0.929825		0.55
	0.6		0.178947	0.473684	0.736842	0.947368		0.6
	0.65		0.217544	0.533333	0.789474	0.964912		0.65
	0.7		0.263158	0.582456	0.824561	0.975439		0.7
	0.75		0.305263	0.635088	0.85614	0.982456		0.75
	0.8		0.347368	0.673684	0.877193	0.989474		0.8
	0.85		0.385965	0.712281	0.894737	0.989474		0.85
	0.9		0.435088	0.750877	0.919298	0.992982		0.9
	0.95		0.463158	0.782456	0.933333	0.996491		0.95
	1		0.512281	0.807018	0.940351	0.996491		1
	1.05		0.540351	0.838596	0.950877	0.996491		1.05
	1.1		0.568421	0.852632	0.954386	0.996491		1.1
	1.15		0.607018	0.870175	0.954386	0.996491		1.15
	1.2		0.631579	0.891228	0.954386	0.996491		1.2
	0.05	mansory in area with fortification level of 0.2g	0.00576369	0.00576369	0.00576369	0.00576369		0.05
	0.1		0.00576369	0.00864553	0.00576369	0.00864553		0.1
	0.15		0.00864553	0.00576369	0.00864553	0.0778098		0.15
	0.2		0.00576369	0.00864553	0.0317003	0.184438		0.2
	0.25		0.00864553	0.0172911	0.0720461	0.302594		0.25
	0.3		0.00576369	0.037464	0.135447	0.435159		0.3
	0.35		0.0144092	0.0605187	0.198847	0.541787		0.35
	0.4		0.0115274	0.0951009	0.268012	0.62536		0.4
	0.45		0.0345821	0.14121	0.345821	0.711816		0.45
	0.5		0.0403458	0.193084	0.417867	0.769452		0.5
	0.55		0.0576369	0.239193	0.487032	0.824207		0.55
	0.6		0.0778098	0.282421	0.544669	0.855908		0.6
	0.65		0.100865	0.337176	0.605187	0.884726		0.65
	0.7		0.121037	0.383285	0.651297	0.907781		0.7
	0.75		0.15562	0.435159	0.70317	0.933718		0.75
	0.8		0.184438	0.478386	0.737752	0.945245		0.8
	0.85		0.216138	0.524496	0.766571	0.956772		0.85
	0.9		0.244957	0.56196	0.795389	0.9683		0.9
	0.95		0.279539	0.602305	0.829971	0.976945		0.95
	1		0.311239	0.636888	0.847262	0.979827		1
	1.05		0.351585	0.674352	0.870317	0.985591		1.05
	1.1		0.37464	0.694524	0.896254	0.988473		1.1
	1.15		0.400576	0.73487	0.916427	0.988473		1.15
	1.2		0.446686	0.755043	0.930836	0.997118		1.2
	0.05	mansory in area with fortification level of 0.3g	0.00852273	0.00568182	0.00568182	0.00284091		0.05
	0.1		0.00852273	0.00852273	0.00852273	0.00568182		0.1
	0.15		0.00568182	0.00852273	0.00852273	0.0113636		0.15
	0.2		0.00852273	0.00852273	0.0113636	0.0539773		0.2
	0.25		0.00852273	0.00852273	0.0142045	0.113636		0.25
	0.3		0.00568182	0.00852273	0.03125	0.190341		0.3
	0.35		0.00568182	0.0113636	0.0511364	0.269886		0.35
	0.4		0.00852273	0.0198864	0.0852273	0.346591		0.4
	0.45		0.00568182	0.03125	0.127841	0.431818		0.45
	0.5		0.0142045	0.0539773	0.176136	0.5		0.5
	0.55		0.0142045	0.0738636	0.224432	0.571023		0.55
	0.6		0.0170455	0.0994318	0.267045	0.633523		0.6
	0.65		0.0198864	0.119318	0.315341	0.684659		0.65
	0.7		0.0284091	0.150568	0.372159	0.732955		0.7
	0.75		0.0369318	0.1875	0.417614	0.778409		0.75
	0.8		0.0568182	0.221591	0.463068	0.809659		0.8
	0.85		0.0625	0.252841	0.514205	0.840909		0.85
	0.9		0.0852273	0.289773	0.553977	0.860795		0.9
	0.95		0.0965909	0.321023	0.59375	0.877841		0.95
	1		0.113636	0.355114	0.619318	0.900568		1
	1.05		0.133523	0.386364	0.65625	0.914773		1.05
	1.1		0.150568	0.420455	0.701705	0.931818		1.1
	1.15		0.170455	0.457386	0.724432	0.940341		1.15
	1.2		0.193182	0.477273	0.747159	0.948864		1.2
	0.05	mansory in area with fortification level of 0.4g	0.00566572	0.00849858	0.00849858	0.00849858		0.05
	0.1		0.0113314	0.00849858	0.0113314	0.0113314		0.1
	0.15		0.0113314	0.00849858	0.0113314	0.0113314		0.15
	0.2		0.0113314	0.00849858	0.0169972	0.0141643		0.2
	0.25		0.0113314	0.00849858	0.0169972	0.0453258		0.25
	0.3		0.0113314	0.00849858	0.0169972	0.0934844		0.3
	0.35		0.0141643	0.0113314	0.0169972	0.133144		0.35
	0.4		0.0141643	0.0169972	0.0339943	0.189802		0.4
	0.45		0.0141643	0.01983	0.0481586	0.246459		0.45
	0.5		0.0169972	0.0226629	0.0679887	0.311615		0.5
	0.55		0.0141643	0.0311615	0.0991501	0.371105		0.55
	0.6		0.0141643	0.0396601	0.135977	0.433428		0.6
	0.65		0.0141643	0.0538244	0.167139	0.495751		0.65
	0.7		0.0169972	0.0764873	0.206799	0.538244		0.7
	0.75		0.01983	0.082153	0.243626	0.589235		0.75
	0.8		0.0226629	0.0991501	0.27762	0.637394		0.8
	0.85		0.0226629	0.130312	0.31728	0.668555		0.85
	0.9		0.0311615	0.13881	0.348442	0.708215		0.9
	0.95		0.0368272	0.167139	0.388102	0.739377		0.95
	1		0.0424929	0.192635	0.424929	0.767705		1
	1.05		0.0566572	0.212465	0.461756	0.804533		1.05
	1.1		0.0651558	0.246459	0.504249	0.82153		1.1
	1.15		0.0736544	0.25779	0.529745	0.838527		1.15
	1.2		0.0849858	0.283286	0.555241	0.852691		1.2
17	2013	Wang Guanghuan, Master 王光环			RC frame with isolators	IDA
	应属于分析表	基于性能的基础隔震钢筋混凝土框架结构的易损性分析
	PGA(g)	sturcture type	collapse	serious damage	medium damge	slight damge	no damage	PGA(g)
	0.1	under effect from near-field earthquake: RC frame with isolators	0.00259067	0.00259067	0.00259067	0.743523		0.1
	0.2		0.00259067	0.00259067	0.181347	0.966321		0.2
	0.3		0	0.00777202	0.430052	0.994819		0.3
	0.4		0.00259067	0.0336788	0.665803	0.994819		0.4
	0.5		0.00777202	0.0932642	0.790155	0.994819		0.5
	0.6		0.0233161	0.183938	0.862694	0.994819		0.6
	0.7		0.0440415	0.292746	0.930052	0.997409		0.7
	0.8		0.0803109	0.406736	0.96114	0.997409		0.8
	0.9		0.132124	0.518135	0.987047	0.997409		0.9
	1		0.194301	0.61399	0.992228	1		1
	1.1		0.266839	0.694301	0.997409	1		1.1
	1.2		0.34456	0.764249	0.997409	1		1.2
	1.3		0.414508	0.823834	1	1		1.3
	1.4		0.494819	0.873057	0.997409	1		1.4
	1.5		0.562176	0.904145	0.997409	1		1.5
	1.6		0.626943	0.930052	1	1		1.6
	1.7		0.681347	0.950777	0.997409	1		1.7
	1.8		0.735751	0.966321	0.997409	1		1.8
	1.9		0.774611	0.981865	0.997409	1		1.9
	2		0.800518	0.984456	0.997409	0.997409		2
	0.1	under effect from far-field earthquake: RC frame with isolators	0.0025	0.0025	0.0025	0.0275		0.1
	0.2		0.0025	0	0.0025	0.8925		0.2
	0.3		0.0025	0.0025	0.08	0.9625		0.3
	0.4		0.0025	0.0025	0.2025	0.9775		0.4
	0.5		0.0025	0.0025	0.405	0.9875		0.5
	0.6		0.0025	0.0175	0.5975	0.9875		0.6
	0.7		0.0075	0.0525	0.7325	0.9875		0.7
	0.8		0.0025	0.1025	0.8275	0.9875		0.8
	0.9		0.01	0.17	0.9025	0.99		0.9
	1		0.02	0.2525	0.95	0.9925		1
	1.1		0.035	0.3275	0.9725	0.9925		1.1
	1.2		0.055	0.4125	0.985	0.9925		1.2
	1.3		0.085	0.51	0.99	0.9925		1.3
	1.4		0.1275	0.61	0.99	0.995		1.4
	1.5		0.1825	0.68	0.995	0.9975		1.5
	1.6		0.2325	0.745	0.995	0.9975		1.6
	1.7		0.2825	0.785	0.9975	1		1.7
	1.8		0.3325	0.82	0.9925	0.9975		1.8
	1.9		0.41	0.87	0.9975	0.9975		1.9
	2		0.4825	0.91	0.995	0.9975		2
18	2015	Yang Guozhi, Master, P65 杨国志	for buildings in middle and west China		old low-storey RC frame
		既有老旧建筑地震灾害下易损性研究
	PGA(g)	sturcture type	collapse	serious damage	medium damge	slight damge	no damage	PGA(g)
	0.05	VI fortificated old building	2.77e-08	0.000119	0.0039	0.10128		0.05
	0.075		1.9e-06	0.002096	0.032182	0.321553		0.075
	0.1		2.6e-05	0.011071	0.10128	0.54459		0.1
	0.2		0.006672	0.237143	0.617191	0.953948		0.2
	0.4		0.185101	0.805892	0.969706	0.999448		0.4
	0.6		0.510848	0.962962	0.997443	0.999986		0.6
	0.8		0.75247	0.992681	0.999725	0.999999		0.8
	0.05	VII fortificated old building	8.95e-09	5.39e-05	0.002127	0.070463		0.05
	0.075		1.25e-06	0.001594	0.026473	0.291482		0.075
	0.1		0	0.010898	0.100226	0.54222		0.1
	0.2		0.0039	0.183627	0.5449	0.932972		0.2
	0.4		0.10128	0.686042	0.932972	0.99804		0.4
	0.6		0.321553	0.902442	0.989535	0.99989		0.6
	0.8		0.54459	0.969325	0.99804	0.99999		0.8
	0.05	VIII fortificated old building	0	1.46e-07	1.94e-05	0.003184		0.05
	0.075		0.00717	8.83e-06	0.000521	0.029198		0.075
	0.1		0	0.000115	0.003783	0.099481		0.1
	0.2		3.48e-05	0.013243	0.114027	0.571781		0.2
	0.4		0.005993	0.225546	0.602583	0.950152		0.4
	0.6		0.048929	0.541265	0.868058	0.993852		0.6
	0.8		0.147521	0.761714	0.957778	0.99907		0.8
	0.05	IX fortificated old building	2.44e-12	0	1.77e-05	0.00298		0.05
	0.075		6.24e-10	7.98e-06	0.000481	0.027735		0.075
	0.1		1.93e-08	0	0.003219	0.090392		0.1
	0.2		2e-05	0.009426	0.090972	0.520536		0.2
	0.4		0.003288	0.168883	0.52195	0.925256		0.4
	0.6		0.02842	0.442126	0.807318	0.987913		0.6
	0.8		0.092139	0.666859	0.925756	0.997681		0.8

## Sheet: Ding Baorong 2016
	附录2	房屋震害资料
	A: 木构架土石砖墙的房屋
	结构形式	地震名称	年份	震级	基本完好	轻微破坏	中等破坏	严重破坏	毁坏	调查总数(万m2)	资料来源
	VI度区
6	砖木	唐山地震	1976	7.8	33	57	20	4	0		[51]P17
6	唐山地区木屋架	唐山地震	1976	7.8	27.1	35.1	30.8	5.9	1.1	427	[51]P194
6	砖木	普洱地震	1993	6.3	38	44	14	4	0	186.48	[30]P16
6	土木	西藏拉孜-昂仁地震	1993	6.6	51	38	9	2	0	113	[30]P24
6	砖木	四川德格地震	1993	5	40	40	15	5	0	3.96	[30]P26
6	土木	四川德格地震	1993	5	40	40	15	5	0	14.39	[30]P26
6	土木	云南景谷-临沧-双江震群	1993	4.9	50.9	34.6	11.6	2.9	0	95.32	[30]P31
6	砖木	云南景谷-临沧-双江震群	1993	4.9	57.8	28.7	10.2	3.3	0	13.07	[30]P31
6	土木	云南中甸地震	1993	5.6	57.2	31.1	9.9	1.8	0	49.6	[30]P36
6	砖木	云南中甸地震	1993	5.6	63	22	10	5	0	23.9	[30]P36
6	土木	四川沐川地震	1993	5	35	38	20	5	2	41.64	[30]P40
6	土木	云南姚安地震	1993	5.6	67.6	23.3	7.4	1.8	0	67.14	[30]P44
6	土木	青海共和-兴海地震	1994	6	47.9	25	25.5	1.6	0	2.19	[30]P66
6	土木	青海共和地震	1994	5.8	29.16	40.39	28.5	1.95	0	2.86	[30]P71
6	土木	四川江油地震	1994	4.7	63	23.7	13	0.3	0	18.38	[30]P75
6	土木	云南景谷地震	1994	5.2	62	28.4	8.1	1.5	0	31.4	[30]P105
6	砖木	云南景谷地震	1994	5.2	63.5	31.4	5.1	0	0	5	[30]P105
6	土木	云南沧源-澜沧地震	1995	5.1	69	22	9	0	0	0.523	[30]P142
6	砖木	云南沧源-澜沧地震	1995	5.1	71.5	22	6	0.5	0	1.25	[30]P142
6	土木	云南金平地震	1995	5.6	67	27	4.3	1.7	0	10.28	[30]P149
6	土木	四川沐川地震	1995	5.1	32	47	16	4	1	43.54	[30]P152
6	土木	云南孟连西中缅交界地震	1995	7.3	69	22	7	2	0	399.68	[30]P163
6	土木	甘肃永登地震	1995	5.8	64.5	20.7‭	12.8	1.7	0.3	869间	[30]P178
6	土木	云南武定地震	1995	6.5	75	‬20	5	0	0	5.95	[30]P 195
6	土木	云南武定地震	1995	6.5	68.8	25.8	4.84	0.5	0.06	661.98	[30]P199
6	土木	四川宜宾地震	1996	5.4	42	41.5	14	2.5	0	224.44	[123]P34
6	砖木	新疆伽师-阿图什地震	1996	6.9	89	5.5	3.6	1.9	0	6.07	[123]P45
6	土木	内蒙古包头西地震	1996	6.4	52.86	28.11	13.34	4.13	1.56	65.95	[123]P57
6	土木	四川白玉-巴塘地震	1996	5.5	24	40	27	9	0	46.5	[123]P86
6	砖木	四川白玉-巴塘地震	1996	5.5	35	38	21	6	0	3.5	[123]P86
6	土木	新疆伽师地震	1997	6.4	91.99	4.42	2.04	1.25	0.3	52	[123]P98
6	土木	福建永安西南地震	1997	5.2	76.51	14.14	7.98	1.37	0	46.43	[123]P128
6	土木	重庆荣昌地震	1997	5.3	40	40	15	5	0	107.51	[123]P135
6	土木	新疆皮山地震	1998	6.2	56	20	12	8	4	27.99	[123]P183
6	砖木	新疆皮山地震	1998	6.2	64.3	26	7	2.3	0.4	9.21	[123]P183
6	砖木	新疆拜城地震	1998	5.5	68.2	19.2	8	4.6	0	2.7	[123]P202
6	砖木	新疆拜城地震	1998	5.5	68.2	19.2	8	4.6	0	0.48	[123]P203
6	土木	云南宁蒗地震	1998	5.3	64.53	22.75	12.34	0.38	0	211.85	[123]P226
6	砖木	云南宁蒗地震	1998	5.3	64.6	24.2	11.19	0	0	25.85	[123]P226
6	土木	云南宁蒗地震	1998	6.2	64.63	25.17	9.51	0.69	0	206	[123]P234
6	土木	云南宣威地震	1998	5.1	80.61	15.23	4.15	0	0	863.36	[123]P241
6	砖木	云南宁蒗地震	1998	6.2	68.65	18.46	10.27	2.63	0	14.98	[123]P234
6	土木	青海玛沁地震	1999	5	31	56	13	0	0	0.356	[123]P318
6	砖木	内蒙古锡林浩特地震	1999	5.2	38	42	16	4	0	7.67	[123]P253
6	砖房	河北张北地震	1999	5.6	43.5	45.5	11	0	0	16.24	[123]P258
6	砖坯房	河北张北地震	1999	5.6	50	30	20	0	0	3.67	[123]P258
6	土木	新疆库车地震	1999	5.6	50.6	33.1	12.2	3.2	0.9	31.43	[123]P265
6	砖木	新疆库车地震	1999	5.6	58.9	28.4	12.7	0	0	7.71	[123]P265
6	土木	新疆库车地震	1999	5.6	66.8	22.3	7.7	2.5	0.7	6.07	[123]P265
6	土木	新疆库车地震	1999	5.6	63	30	7	0	0	1.995	[123]P265
6	一般民房	重庆荣昌地震	1999	5	57	37	6	0	0	1.3	[123]P289
6	砖木	重庆荣昌地震	1999	5	58	37	5	0	0	1.6	[123]P289
6	土木	四川绵竹清平地震	1999	5	30	60	10	0	0		[123]P294
6	土木	云南澄江地震	1999	5.2	64.26	23.68	11.52	0.43	0.11	151.57	[123]P312
6	土木	青海玛沁地震	1999	5	38	56	6	0	0	1.88	[123]P318
6	石砌屋	辽宁海城-岫岩地震	1999	5.6	27.6	43.1	20.3	8.1	0.9	7747间	[123]P322
6	砖房	辽宁海城-岫岩地震	1999	5.6	62.1	28.5	5.3	4.1	0		[123]P322
6	石砌屋	辽宁海城-岫岩地震	1999	5.6	8.58	38.81	41.04	11.57	0	8097间	[123]P322
6	砖房	辽宁海城-岫岩地震	1999	5.6	64.5	30.62	4.88	0	0		[123]P322
6	砖木	四川绵竹汉旺地震	1999	5	79	15	6	0	0	8.287	[123]P329
6	土木	云南姚安地震	2000	6.5	76.2	18.1	5.39	0.31	0	1677.15	[123]P349
6	土木	云南丘北-弥勒地震	2000	5.5	75.71	19.73	4.55	0	0	473.34	[123]P355
6	砖木	青海杂多地震	2000	5.3	82.5	16	1.5	0	0	1.58	[123]P365
6	砖木	青海杂多地震	2000	5.3	66.6	26	5	2.1	0.3	6.6	[123]P365
6	砖柱土坯	青海杂多地震	2000	5.3	69	17	14	0	0	2.86	[123]P365
6	干打垒	青海杂多地震	2000	5.3	76	15	9	0	0	0.385	[123]P365
6	砖柱土坯	青海杂多地震	2000	5.3	57.6	17	14	10	1.4	2.765	[123]P365
6	砖木	云南武定地震	2000	5.1	67.14	24.44	7.72	0.7	0	13.07	[123]P379
6	土木	云南武定地震	2000	5.1	65.68	24.48	9.73	0.11	0	284	[123]P379
6	砖木	云南陇川西中缅边境地震	2000	5.8	61.4	37.02	1.43	0.15	0	5.98	[123]P389
6	土木	云南陇川西中缅边境地震	2000	5.8	60.62	34.26	4.74‭	0.37	0	231.8	[123]P389
6	土木	四川雅江-康定地震	2001	6	39	30	‬22	9	0	123.09	[35]
6	土木	云南施甸地震	2001	5.2	61.24	28.72	9.77	0.27	0	23.22	[21]
6	土木	甘肃肃南地震	2001	5.3	19.6	62.5	12.5	5.4	0	0.896	[125]P74
6	砖柱土坯	甘肃肃南地震	2001	5.3	58.1	32.6	9.3	0	0	0.99	[125]P74
6	土木	云南江川地震	2001	5.1	76.83	21.52	1.65	0	0	235.453	[125]P79
6	土木	云南澜沧地震	2001	5	66.33	29.05	4.62	0	0	13.167	[125]P15
6	砖木	云南澜沧地震	2001	5	67.25	25.53	7.12	0.11	0	76.2243	[125]P15
6	土木	四川盐源地震	2001	5.8	6	40	34	20	0	51.3525	[125]P35
6	土木	云南宁蒗-四川盐源地震	2001	5.8	67.17	27.31	5.52‭	0	0	90.9722	[125]P45
6	砖木	云南宁蒗-四川盐源地震	2001	5.8	73.49	26.51	‬0	0	0	12.947	[125]P45
6	木垛房	云南宁蒗-四川盐源地震	2001	5.8	74.36	25.64	0	0	0	82.904	[125]P45
6	一般民房	重庆荣昌地震	2001	4.9	57	37	6	0	0	11.0309	[125]P62
6	砖木	重庆荣昌地震	2001	4.9	58	37	5	0	0	4.7275	[125]P62
6	土木	云南楚雄地震	2001	5.3	77.97	21.27	0.27	0	0	2041.52	[125]P67
6	砖木	云南楚雄地震	2001	5.3	78.64	21.27	0.09	0	0	29.6592	[125]P67
6	砖木	甘肃肃南地震	2001	5.3	92.6	7.4	0	0	0	0.99	[125]P74
6	农村楼房	四川仁寿-双流地震	2002	4.6	79	15	5	1	0	16.2	[108]
6	一般房屋	四川仁寿-双流地震	2002	4.6	94	5	1	0	0	10.8	[108]
6	农村楼房	四川仁寿-双流地震	2002	4.6	93	6	1	0	0	248.74	[108]
6	一般房屋	四川仁寿-双流地震	2002	4.6	92.8	5.1	2.1	0	0	168.78	[108]
6	一般房屋	四川新龙地震	2002	5.3	70.48	20.29	7.53	1.69	0	81.5216	[125]P100
6	砖木	四川新龙地震	2002	5.3	90	7	3	0	0	63.2864	[125]P100
6	土木	内蒙古锡林郭勒盟西乌珠穆玛沁旗地震	2002	5	33	41	20	6	0	2.6308	[125]P111
6	砖木	内蒙古锡林郭勒盟西乌珠穆玛沁旗地震	2002	5	55	30	13	2	0	6.1387	[125]P111
6	土坯房	甘肃玉门地震	2002	5.9	59.43	32.77	7.8	0	0	1.6636	[125]P115
6	简易房	甘肃民乐-山丹地震	2003	6.1, 5.8	54.75	22.42	11.4	8.4	3	54.5952	[125]P279
6	土坯房	甘肃民乐-山丹地震	2003	6.1, 5.8	54.75	22.42	11.4	8.4	3	73.0776	[125]P279
6	砖木	甘肃民乐-山丹地震	2003	6.1, 5.8	58	21.7	12.06	7.67	0.56	61.625	[125]P279
6	土坯房	青海德令哈地震	2003	6.6	1	24	21	30	24	7.2434	[125]P173
6	砖柱土坯	青海德令哈地震	2003	6.6	13	27	30	23	7	6.9145	[125]P173
6	土木房	新疆伽师地震	2003	5.8	5.21	24.09	28.49	27.75	14.46	72.367	[125]P190
6	土坯房	四川西昌-昭觉间地震	2003	4.8	69.96	22.18	7.86	0	0	12.942	[125]P208
6	土木	云南大姚地震	2003	6.2	64.51	29.87	5.46	0.12	0	1022.1	[125]P217
6	砖木	云南大姚地震	2003	6.2	75.98	20.37	3.43	0.2	0	146.879	[125]P217
6	土坯房	内蒙古巴林左旗-阿鲁科沁旗地震	2003	5.9	14.35	20.26	34.54	24.82	6	299.569	[125]P226
6	砖木	内蒙古巴林左旗-阿鲁科沁旗地震	2003	5.9	38.13	45.47	13.6	2.24	0.55	272.861	[125]P226
6	土木	四川盐源地震	2003	5	25.25	40.56	28.37	5.8	0	294.768	[125]P247
6	土木	云南大姚地震	2003	6.1	72.33	21.83	5.85	0	0	503.451	[125]P267
6	砖木	云南大姚地震	2003	6.1	76.55	17.7	5.75	0	0	39.5284	[125] P267
6	土木	云南鲁甸地震	2003	5.1	69.39	26.51	3.71	0.32	0.07		[125]P313
6	砖木	云南鲁甸地震	2003	5.1	74.22	22.21	2.92	0.65	0		[125]P313
6	土木	云南鲁甸地震	2003	5.1	53.86	34.95	9.93	1.13	0.1		[125]P331
6	砖木	云南鲁甸地震	2003	5.1	60.7	29.87	7.46	1.29	0.64		[125]P331
6	土坯房	内蒙古锡林郭勒盟东乌珠穆玛沁旗地震	2004	5.9	34.18	38.95	18.73	6.59	1.51	33.9386	[125]P366
6	砖木	内蒙古锡林郭勒盟东乌珠穆玛沁旗地震	2004	5.9	35.63	33.09	23.45	6.44	1.37	64.66	[125]P3 66
6	土木	云南鲁甸地震	2004	5.6	75.61	16	7.28	1.03	0.07	558.21	[125]P402
6	砖木	云南鲁甸地震	2004	5.6	74.01	18.96	6.38	0.62	0	66.2006	[125]P402
6	土坯房	甘肃岷县-卓尼地震	2004	5	19.95	39.93	27.07	11.42	1.61	29.6244	[125]P420
6	土木	云南双柏地震	2004	5	76.26	20.09	2.98	0.47	0.19	134.431	[125]P447
6	砖木	云南双柏地震	2004	5	77.33	21.59	0.48	0.59	0	34.2555	[125]P447
6	土木	云南思茅地震	2005	5	70.42	23.24	5.63	0.7	0	29.9407	[125]P475
6	砖木	云南思茅地震	2005	5	70.23	23.17	4.52	1.36	0.72	136.328	[125]P475
6	土坯房	大庆林甸地震	2005	5.1	9.52	0	28.56	0	61.9	2.3233	[125]P499
6	砖木	大庆林甸地震	2005	5.1	12.19	0	24.38	0	63.4	0.7839	[125]P499
6	土木	云南文山地震	2005	5.3	76.95	19.57	2.49	0.75	0.24	269.659	[125]P521
6	砖木	云南文山地震	2005	5.3	81.82	16.63	0.77	0.64	0.13	159.266	[125]P521
6	土木	新疆墨玉县地震	2005	5.2	24.09	24.09	27.37	17.88	6.57	6.462	[125]P533
6	砖木	新疆墨玉县地震	2005	5.2	26.03	32.89	24.65	16.43	0	1.5959	[125]P533
6	砖木	广西平果-田东地震	2005	4.6	78.91	0	20.05	0	1.01	18.0436	[125]P538
6	砖木	福建顺昌地震	2007	4.7	89.44	8.63	1.94	0	0	1.244	[5]
6	土木	福建顺昌地震	2007	4.7	89.76	8.48	1.73	0	0.03	9.548	[5]
6	砖(土)木	四川攀枝花地震	2008	6.1	16.7	41.7	29.2	12.5	0		[8]
6	土木	云南姚安地震	2009	6	74.47		24.98		0.55	47.1415	[70]
6	土木	云南姚安地震	2009	6	74.47		23.45		2.08	1184.29	[70]
6	砖木	云南姚安地震	2009	6	78.88		21.12		0	12.3663	[70]
6	砖木	云南姚安地震	2009	6	77.41		21.48		1.11	186.407	[70]
6	土木	新疆尼勒克-巩留交界地震	2011	6	58	24	13	3	2	322.52	[83]
6	砖木	新疆尼勒克-巩留交界地震	2011	6	61	34	3	2	0	248.681	[83]
6	土木	新疆和硕地震	2012	5	14.8	37.4	36.7	10.7	0.4	10	[7]
6	砖木	新疆和硕地震	2012	5	83.6	13.6	2.8	0	0	16.79	[7]
6	土木	岷县漳县地震	2013	6.6	60.8	19.4	10.5	6	3.3		[73]
6	砖木	岷县漳县地震	2013	6.6	69	23.9	5.3	1.2	0.6		[73]
6	木架	新疆玉田地震	2014	7.3	93.2		6.8		0	319.02	[24][81]
6	土坯房	新疆玉田地震	2014	7.3	62		30		8	413.174	[24][81]
6	砖木	新疆玉田地震	2014	7.3	79.7	14.1	4.8	1.4	0	320.7	[82][24]
6	石木	四川康定地震	2014	6.3	75.08		22.64		2.28		[41]
6	土木	云南鲁甸地震	2014	6.5	79.28		19.07		1.65	15.174	[58]
6	砖木	云南鲁甸地震	2014	6.5	77.31		22.69		0	2.887	[58]
6	木架	新疆玉田地震	2014	7.3	74		26		0	12.48	[82]
6	砖木	新疆玉田地震	2014	7.3	92.4	13.1	3.1	1.4	0	11.414	[82]
	VII度区
7	多层砖木	唐山地震	1976	7.8	50	20	20	10	0	10间	[51]P17
7	城乡平房	唐山地震	1976	7.8	4.8	29.2	17.1‭	43.4	5.5	18156间	[51]P193
7	木屋架	唐山地震	1976	7.8	1.9	25.4	‬10	54.4	8.3	1367间	[51]P194
7	砖石墙	唐山地震	1976	7.8	3.5	46.5	12.5	25	12.5	292间	[51]P195
7	土木	西藏拉孜-昂仁地震	1993	6.6	7	40	32	20	1	53.61	[30]P24
7	土木	云南姚安地震	1993	5.6	44.8	33.9	16	5.1	0.2	20.9	[30]P44
7	疏附土木	新疆喀什地震	1993	6	23.01	28.99	25.02	15.03	7.95		[30]P54
7	喀什土木	新疆喀什地震	1993	6	23	29	25	15	8	30.96	[30]P54
7	克孜勒土木	新疆喀什地震	1993	6	23	29	25	15	8	10.28	[30]P54
7	土木	青海共和-兴海地震	1994	6	15.4	15.4	34.2	35	0	0.0585	[30]P66
7	土木	青海共和-兴海地震	1994	6	0	33.7	41	24.2	1.1	1.28	[30]P66
7	土木	青海共和地震	1994	5.8	0	6.64	33.18	43.36	16.82	0.368	[30]P71
7	土木	青海共和-兴海地震	1994	5.5	0	0	30	40	30	0.126	[30]P109
7	土木	四川沐川地震	1994	5.7	5	18.03	41.23	22.74	13	6.489	[30]P116
7	土木	云南金平地震	1995	5.6	29	49	14‭	8	0	2.2	[30]P149
7	土木	云南金平地震	1995	5.6	36	51	‬10	3	0	1.2	[30]P149
7	土木	云南金平地震	1995	5.6	33	42	15	10	0	0.6	[30]P149
7	土木	云南孟连西中缅交界地震	1995	7.3	57	19	16	8	0	172.65	[30]P163
7	土木	甘肃永登地震	1995	5.8	0.5	15.81	47.35	23.72	12.62	968间	[30]P169
7	土木	云南武定地震	1995	6.5	57	30	10	3	0	6.27	[30]P195
7	土木	云南武定地震	1995	6.5	22.2	32.4	19.3	13.8	12.3	45.53	[30]P199
7	土木	四川宜宾地震	1996	5.4	16	24	42	18	0	20.58	[123]P34
7	砖木	新疆伽师-阿图什地震	1996	6.9	16.3	16	36.7	16.3	14.7	1.81	[123]P45
7	土木	内蒙古包头西地震	1996	6.4	29.59	33.58	23.47	11.3	2.05	111	[123]P57
7	砖木	内蒙古包头西地震	1996	6.4	41.01	30.34	19.47	8.13	1.05	43.73	[123]P57
7	土木	甘肃天祝-古浪地震	1996	5.4	0	30	35	25	10	2.26	[123]P67
7	土木	四川白玉-巴塘地震	1996	5.5	15	27	37	18	3	21.26	[123]P86
7	砖木	四川白玉-巴塘地震	1996	5.5	16	25	42	17	0	1.2	[123]P87
7	砖木	四川宜宾地震	1996	5.4	37.8	43.4	16.8	2	0	11.18	[123]P34
7	土木	新疆伽师地震	1997	6.4	2.76	16.7	61.5	16.23	2.81	203.8	[123]P98
7	土木	云南景洪-江城地震	1997	5.5	41.3	29.2	21.7	7.8	0	9.456	[123]P109
7	砖木	云南景洪-江城地震	1997	5.5	37.3	30	23.6	9.1	0	4.243	[123]P109
7	土木	新疆伽师地震	1997	‬6	0	1	15.33	39	44.67	6.3	[123]P114
7	土木	新疆伽师地震	1997	6.6‭	0	7.7	12.6	31.5	48.2	90.17	[123]P114
7	土木	重庆荣昌地震	1997	‬5.3	15	25	45	10	5	18.05	[123]P135
7	砖房	河北张北地震	1998	6.2	5	24	45	22	4	9.52	[123]P163
7	砖坯房	河北张北地震	1998	6.2	0	4	49	31	16	67.97	[123]P163
7	土坯房	河北张北地震	1998	6.2	0	2	47	35	16	58.46	[123]P163
7	石坯房	河北张北地震	1998	6.2	0	4	21	42	33	95.76	[123]P163
7	土木	新疆阿图什地震	1998	6	22.87	20.21	25	21.28	10.64	6.244	[123]P174
7	土木	新疆皮山地震	1998	6.2	12	16	30	22	20	1.408	[123]P183
7	砖木	新疆皮山地震	1998	6.2	57	21	12	7	3	0.47	[123]P183
7	土木	云南宁蒗地震	1998	5.3	34.48	38.16	19.8	7.35	0.21	12.35	[123]P226
7	土木	云南宁蒗地震	1998	6.2	31.99	37.99	20.58	8.74	0.7	183.7	[123]P234
7	土木	云南宜威地震	1998	5.1	63.43	19.77	11.86	4.45	0.49	51.69	[123]P241
7	砖房	河北张北地震	1999	5.6	30	24.5	22.7	22.8	0	3.74	[123]P258
7	砖坯房	河北张北地震	1999	5.6	11	16.8	39	33.2	0	1.04	[123]P258
7	土木	新疆库车地震	1999	5.6	38.6	31.4	19.1	7.5	3.4	5.9	[123]P265
7	土木	甘肃文县-武都地震	1999	4.7	2.08	19.79	57.81	15.1	5.22	1.09	[123]P271
7	一般民房	重庆荣昌地震	1999	5	15	59.4	23	2.6	0	0.768	[123]P289
7	砖木	重庆荣昌地震	1999	5	17	62	21	0	0	1.572	[123]P289
7	石屋	辽宁海城-岫岩地震	1999	5.6	2.12	9.3	36.98	42.52	9.08	1600间	[123]P322
7	砖房	辽宁海城-岫岩地震	1999	5.6	16.86	49.92	23.89	9.33	0		[123]P322
7	石屋	辽宁海城-岫岩地震	1999	5.6	2.76	12.84	47.65	36.05	0.7	632间	[123]P322
7	砖房	辽宁海城-岫岩地震	1999	5.6	14.23	29.2	39.05	17.52‭	0		[123]P322
7	土木	云南姚安地震	2000	6.5	62.42	27.65	9.05	‬0.88	0	661.07	[123]P349
7	土木	云南丘北-弥勒地震	2000	5.5	23.89	52.62	16.36	6.58	0.55	16.28	[123]P355
7	土木	四川雅江-康定地震	2001	6	20	24	33	18	5	29.47	[35]
7	土木	云南施甸地震	2001	5.2	8.6	57.1	25.7	8.6	0	1.05	[21]
7	砖木	云南施甸地震	2001	5.2	21	55	25	0	0	0.02	[21]
7	木垛房	云南宁蒗-四川盐源地震	2001	5.8	65.2‭	31.85	2.95	0	0	15	[125]P45
7	土木	四川盐源地震	2001	5.8	‬0	12	23	40	25	12.6375	[12 5]P35
7	土木	云南宁蒗-四川盐源地震	2001	5.8	54.35	25.15	12.77	7.74	0	12.88	[125]P45
7	土坯房	甘肃玉门地震	2002	5.9	55.81	29.71	12.28	2.17	0	0.498	[12 5]P115
7	一般房屋	四川新龙地震	2002	5.3	61	20.8	12.69	4.21	1.26	31.823	[125]P100
7	土木	新疆巴楚-伽师地震	2003	6.8	41.04	25.22	17.39	12.94	3.38	977.47	[80
7	砖木	新疆巴楚-伽师地震	2003	6.8	47.2	28.1	19.2	5.5	0		[80]
7	简易房	甘肃民乐-山丹地震	2003	6.1, 5.8	10.19	14.5	24.54	30.94	19.81	69.4598	[125]P279
7	土木	云南大姚地震	2003	6.2	32.65	32.43	26.6	8.07	0.21	369.206	[125]P271
7	土木	云南大姚地震	2003	6.1	38.84	31.87	22.11	7.17	0	161.364	[125]P267
7	土木	云南鲁甸地震	2003	5.1	29.94	56.28	9.34	3.19	1.25		[125]P313
7	土木	云南鲁甸地震	2003	5.1	5.73	32.41	56.22	4.13	1.5		[125]P331
7	土坯房	内蒙古巴林左旗-阿鲁科沁旗地震	2003	5.9	16.2	19.44	21.29	18.29	24.77	101.413	[125]P226
7	土坯房	甘肃民乐-山丹地震	2003	6.1, 5.8	13.72	26.12	25.62	24.68	9.85	80.5341	[125]P279
7	砖木	内蒙古巴林左旗-阿鲁科沁旗地震	2003	5.9	17.8	30.19	30.13	18.46	3.39	311.987	[12 5]P226
7	砖木	甘肃民乐-山丹地震	2003	6.1, 5.8	28.15	30.76	22.54	15.8	2.74	73.2923	[125]P279
7	砖木	云南大姚地震	2003	6.2	32.11	31.76	30.89	5.21	0	57.9992	[125]P217
7	砖木	云南大姚地震	2003	6.1	35.35	32.93	31.72	0	0	4.746	[125]P267
7	砖木	云南鲁甸地震	2003	5.1	16.55	49.88	33.57	0	0		[12 5]P313
7	砖木	云南鲁甸地震	2004	5.1	10.47	46.06	42.38	1.07	0		[125]P331
7	土木	云南鲁甸地震	2004	5.6	37.99	21.09	19.57	17.87	3.47	202.846	[125]P402
7	土坯房	甘肃岷县-卓尼地震	2004	5	8.77	25	30.27	27.84	8.1	12.1611	[125]P420
7	土坯房	内蒙古锡林郭勒盟东乌珠穆玛沁旗地震	2004	5.9	21.29	25.25	24.75	15.84	12.86	1.2588	[125]P366
7	砖木	内蒙古锡林郭勒盟东乌珠穆玛沁旗地震	2004	5.9	20.13	20.86	35.84	13.31	9.82	2.3808	[12 5]P366
7	砖木	云南鲁甸地震	2004	5.6	37.34	25.59	21.48	13.72	1.85	23.8357	[125]P402
7	砖土木	四川攀枝花地震	2008	6.1	4	12	24	40	20		[8]
7	土木	云南姚安地震	2009	6	29.61		65.32		5.07	32.2327	[70]
7	土木	云南姚安地震	2009	6	41.11		50.49		8.4	270.481	[70]
7	砖木	云南姚安地震	2009	6	51.63		39.59		8.78	6.729	[70]
7	砖木	云南姚安地震	2009	6	49.77‭		43.2		7.3	29.0509	[70]
7	土木	青海玉树地震	2010	7.1	‬0	5	20	47	28		[67]
7	砖木	青海玉树地震	2010	7.1	47	24	17	2	10		[67]
7	土木	新疆尼勒克-巩留交界地震	2011	6	4	30	38	23	5		[83]
7	砖木	新疆尼勒克-巩留交界地震	2011	6	47	32	17	4	0	103.178	[83]
7	土木	岷县漳县地震	2013	6.6	15.6	23.6	25.5	21.3	14	97.8575	[73]
7	砖木	岷县漳县地震	2013	6.6	28.7	41.8	18.9	7.7	2.9		[73]
7	木架	新疆玉田地震	2014	7.3	61.9		36.4	4.9	1.7	2.009	[82]
7	木架	新疆玉田地震	2014	7.3	61.9		36.4		1.7		[81][24]
7	石木	四川康定地震	2014	6.3	41.69		39.86		18.45		[41]
7	土木	云南鲁甸地震	2014	6.5	32.28		49.25		18..47	5.5575	[58]
7	土坯房	新疆玉田地震	2014	7.3	34.7		50.6		14.7‭		[24][81]
7	砖木	新疆玉田地震	2014	7.3	51.6	34.8	8.5		‬0.2	6.1325	[82]
7	砖木	云南鲁甸地震	2014	6.5	23.81		64.07		12.12	1.155	[58]
7	砖木	新疆玉田地震	2014	7.3	51.6	34.8	8.5	4.9	0.2		[24][81]
	VIII度区
8	城乡平房	唐山地震	1976	7.8	3.9	44.9	12	15.3	23.8	12399间	[51]P193
8	木屋架	唐山地震	1976	7.8	15.9‭	30.3	33.3	6.5	14	3533间	[51]P194
8	砖石墙	唐山地震	1976	7.8	‬1.1	0.7	56.8	20	21.4	720间	[51]P195
8	土坯墙	唐山地震	1976	7.8	0	8.7	28.5	5.9	56.9	1084间	[51]P197
8	土木	西藏拉孜-昂仁地震	1993	6.6	2	12	40	42	4	6.996	[30]P24
8	土木	云南孟连西中缅交界地震	1995	7.3	15	35	35	15	1	8.67	[30]P163
8	土木	甘肃永登地震	1995	5.8	0	0	15.11	39.25	45.64	622间	[30JP169
8	土木	云南武定地震	1995	6.5	11.4	41.7	29.2	13.4	4.3	13.39	[30]P195
8	土木	内蒙古包头西地震	1996	6.4	5.09	6.36	31.16	39.46	17.94	8.57	[123]P57
8	砖木	内蒙古包头西地震	1996	6.4	20.68	10.86	27.02	30.33	11.11	5.41	[123]P57
8	土木	新疆伽师地震	1997	6.4	0	0	11.04	33.78	55.18	43.86	[123]P98
8	土木	云南宁蒗地震	1998	6.2	0	19.14	54.03	25.26	1.58	9.36	[123]P234
8	土木	云南姚安地震	2000	6.5	12.95	50.04	31.88	4.81	0.32	528.24	[123]P349
8	土木	甘肃景泰地震	2000	5.9	0	5	20	40	35	0.855	[123]P373
8	土木	云南施甸地震	2001	5.2	0	9	50	40	0.7	1.5	[21]
8	土木	云南施甸地震	2001	5.2	1.2	10	52	36	0.8	1.25	[21]
8	土木	云南施甸地震	2001	5.2‭	20	8	20	50	2	0.25	[21]
8	土木	四川雅江-康定地震	2001	‬6	4	14	47	20	15	15.646	[35]
8	土木	新疆巴楚-伽师地震	2003	6.8	1.55	11.01	17.48	27.2	42.74	303.94	[80]
8	砖木	新疆巴楚-伽师地震	2003	6.8	10	25	40	25	0		[80]
8	土坯房	内蒙古巴林左旗-阿鲁科沁旗地震	2003	5.9	0	0	2.57	53.65	43.77	16.1885	[125]P226
8	简易房	甘肃民乐-山丹地震	2003	6.1, 5.8	6.9	25.71	19.3	14.25	33.81	10.1307	[125]P279
8	土木	云南大姚地震	2003	6.2	3.51	16.92	41.66	29.95	7.92	47.813	[125]P217
8	土木	云南大姚地震	2003	6.1	5.41	32.73	26.13	21.62	14.11	28.917	[125]P267
8	土木	新疆昭苏地震	2003	6.1	0	0	0	6.19	93.81	2.754	[125JP341
8	土坯房	甘肃民乐-山丹地震	2003	6.1, 5.8	5.26	28.09	28.27	23.17	15.19	19.2791	[125]P279
8	砖木	内蒙古巴林左旗-阿鲁科沁旗地震	2003	5.9	0	4.98	19.95	44.61	30.45	26.4714	[125]P226
8	砖木	甘肃民乐-山丹地震	2003	6.1, 5.8	9.65	25.78	25.42	33.54	5.59	13.8807	[125]P279
8	砖木	云南大姚地震	2003	6.2	10.55	29.62	38.99	17.37	3.47	7.511	[125]P217
8	砖木	云南大姚地震	2003	6.1	12.24	40.82	25.71	16.73	4.49	0.8505	[125]P267
8	砖土木	四川攀枝花地震	2008	6.1	0	0	14.3	33.3	52.4		[8]
8	土木	云南姚安地震	2009	6	9.84		48.11		42.05	67.6073	[70]
8	砖木	云南姚安地震	2009	6	15.2		76.43		8.37	7.0161	[70]
8	土木	青海玉树地震	2010	7.1	0	0	9	50	41		[67]
8	砖木	青海玉树地震	2010	7.1	19	2	20	23	36		[67]
8	土木	岷县漳县地震	2013	6.6	2.7	5.7	16.4	39.7	35.5		[73]
8	砖木	岷县漳县地震	2013	6.6	7.9	25.9	28.1	23.9	14.2		[73]
8	土木	云南鲁甸地震	2014	6.5	3.62		25.16		71.22	6.192	[58]
8	砖木	云南鲁甸地震	2014	6.5	2.7		27.03		70.27	0.37	[58]
	IX度区
9	多层砖木	唐山地震	1976	7.8	1	5.4	33.2	23.4	37	205间	[51]P17
9	城乡平房	唐山地震	1976	7.8	1.8	17.5	17.1	24.7	38.9	12717间	[51]P193
9	木屋	唐山地震	1976	7.8	2.3	14	19.7	28.3	35.7	1512间	[51]P194
9	砖石墙	唐山地震	1976	7.8	0	9	44.3	12.5	34.2	229间	[51]P195
9	砖石墙	唐山地震	1976	7.8	0.2	47.1	0.8	9	42.9	1328间	[51]P196
9	土坯墙	唐山地震	1976	7.8	0	0	0	0	100	36间	[51]P197
9	土木	云南武定地震	1995	6.5	0	24.9	24.6	35.7	14.8	10.3	[30]P195
9	土木	新疆巴楚-伽师地震	2003	6.8	0	0	0	0	100	83.25	[80]
9	都江堰砖木	汶川地震	2008	8	24	7	4	30	35	230幢	[114]
9	土木	青海玉树地震	2010	7.1	0	0	0	0	100		[67]
9	砖木	青海玉树地震	2010	7.1	27	2	15	11	45		[67]
9	砖木	云南芦山地震	2013	7	0	0	25	32	43	0.22	[98]
9	土木	云南鲁甸地震	2014	6.5	0		2.07		97.93	3.865	[58]
9	砖木	云南鲁甸地震	2014	6.5	0		9.26		90.74	0.54	[58]
	X度区
10	多层砖木	唐山地震	1976	7.8	0	0	0	0	100	13间	[51]P17
10	砖石墙	唐山地震	1976	7.8	0	0	1.6	10.8	87.6	379间	[51]P196
10	土坯墙	唐山地震	1976	7.8	0	0	0	0	100	4.5	[51]P197
10	砖石墙	唐山地震	1976	7.8	3.9	4.5	19.7	19.8	52.2	1200间	[51]P195
	XI度区
11	城乡平房	唐山地震	1976	7.8	0	0.6	1.1	2.2	96.1		[51]P193
11	木屋架	唐山地震	1976	7.8	0	1.7	3	9	86.3	526间	[51]P194
11	砖石墙	唐山地震	1976	7.8	0	0	0.2	0.2	99.6	2087间	[51]P195
11	砖石	唐山地震	1976	7.8	0	0	0	0.2	99.8	421间	[51]P196
11	土坯墙	唐山地震	1976	7.8	0	0	0	0	100	9间	[51]P197
	A+: 穿斗木屋架
	结构形式	地震名称	年份	震级	基本完好	轻微破坏	中等破坏	严重破坏	毁坏	调查总数(万m2)	资料来源
	VI度区
6	穿斗木屋架	普洱地震	1993	6.3	84	12	4	0	0	186.48	[30]P15
6	穿斗木屋架	云南景谷-临沧-双江震群	1993	4.9	88.5	11.5	0	0	0	0.312	[30]P31
6	穿斗木屋架	云南孟连西中缅交界地震	1995	7.3	82	13	4	1	0	149.6	[30]P163
6	穿斗木屋架	云南武定地震	1995	6.5	82	15	3	0	0	5.28	[30]P195
6	穿斗木屋架	云南丽江地震	1996	7	63.6	25.5	10.1	0.8	0	1625.7	[123]P22
6	穿斗木屋架	云南丽江地震	1996	7	73	19	8	0	0	118.5	[123]P23
6	穿斗木屋架	云南丽江地震	1996	5.2	57	37	5.7	0.3	0	48.07	[123]P75
6	穿斗木屋架	云南丽江地震	1996	5.7	69	22.7	8.3	0	0	20.13	[123]P82
6	穿斗木屋架	云南勐腊-景洪地震	1997	5.1	69.3	22.3	8.4	0	0	11	[123]P104
6	穿斗木屋架	云南勐腊-景洪地震	1997	5.1	71.9	20	8.1	0	0	45	[123]P104
6	穿斗木屋架	云南勐腊-景洪地震	1997	5.5	62.8	28.3	8.9	0	0	145.16	[123]P109
6	穿斗木屋架	云南勐腊-景洪地震	1997	5.5	69.7‭	26.2	4.1	0	0	15.89	[123]P109
6	穿斗木屋架	云南丽江地震	1997	5.3	‬66	31	3	0	0	32.72	[123]P145
6	穿斗木屋架	云南宣威地震	1998	5.1	81.25	16.25	2.49	0	0	127.9	[123]P241
6	穿斗木屋架	云南澄江地震	1999	5.2	65.5	21.5	13	0	0	3.544	[123]P312
6	穿斗木屋架	云南姚安地震	2000	6.5	85.6	10.9	3.5	0	0	205.99	[123]P349
6	穿斗木屋架	云南丘北-弥勒地震	2000	5.5	79.01	18.21	2.78	0	0	174.66	[123]P355
6	穿斗木屋架	青海兴海地震	2000	6.6	54.4	45.6	0	0	0	0.263	[123]P383
6	穿斗木屋架	青海兴海地震	2000	6.6	80.5	18.9	0.6	0	0	1.465	[123]P383
6	穿斗木屋架	云南永胜地震	2001	6	72.76	21.86	5.38	0	0		[88]
6	穿斗木屋架	云南永胜地震	2001	6	75.64	21.26	3.1	0	0		[88]
6	穿斗木架	云南澜沧地震	2001	5	64.59	26.46	8.96	0	0	76.7422	[125]P15
6	穿斗木架	四川盐源地震	2001	5.8	55	27	18	0	0	41.082	[125JP35
6	穿斗木架	甘肃岷县-卓尼地震	2004	5	42.61	30.73	21.4	5.23	0	52.7611	[125]P420
	VII度区
7	穿斗木屋架	普洱地震	1993	6.3	15	37	33	15	0	60.42	[30]P15
7	穿斗木屋架	云南孟连西中缅交界地震	1995	7.3	62	20	15‭	3	0	94.16	[30]P163
7	穿斗木屋架	云南武定地震	1995	6.5	58	30	‬10	2	0	2.7	[3 0]P195
7	穿斗木屋架	云南丽江地震	1996	7	36.8	28.8	25.3	9.1	0	874.9	[123]P22
7	穿斗木屋架	云南丽江地震	1996	7	39	37	16	8	0		[123]P23
7	穿斗木屋架	四川宜宾地震	1996	5.4	15.4	34.6	38.8	11.2	0	5	[123]P34
7	穿斗木屋架	云南丽江地震	1996	5.2	38.4	43	18	0.6	0		[123]P75
7	穿斗木屋架	云南丽江地震	1996	5.7	29.7	50	19.7	0.3	0	38.27	[123]P82
7	穿斗木屋架	云南宁蒗地震	1998	6.2	19.9	33.35	32.8	13.95	0	57.63	[123]P234
7	穿斗木屋架	云南宣威地震	1998	5.1	46.15	33.33	20.51	0	0	4.65	[123]P241
7	穿斗木屋架	云南姚安地震	2000	6.5	85.05	10.1	4.85	0	0	49.09	[123]P349
7	穿斗木屋架	云南丘北-弥勒地震	2000	5.5	74.51	17.65	7.84	0	0	0.88	[123]P355
7	穿斗木屋架	青海兴海地震	2000	6.6	60	40	0	0	0	0.25	[123]P383
7	穿斗木屋架	云南永胜地震	2001	6	37.16	39.73	19.47	3.4	0.25		[88]
7	穿斗木屋架	云南永胜地震	2001	6	45.22	34.04	20.74	0	0		[88]
7	穿斗木屋架	四川盐源地震	2001	5.8	17	50	25	8	0	10.11	[125]P35
7	穿斗木屋架	甘肃岷县-卓尼地震	2004	5	31.17	35.47	18.56	10.31	4.46	21.944	[125]P420
	VIII度区
8	穿斗木屋架	普洱地震	1993	6.3	2	17	38	42	1	13.03	[30]P15
8	穿斗木屋架	云南武定地震	1995	6.5	10	40	35	15	0	5.75	[30]P195
8	穿斗木屋架	云南丽江地震	1996	7	5.9	36.8	46.8	7.3	3.1	481.22	[123]P22
8	穿斗木屋架	云南丽江地震	1996	7	10	40	35	15	0	51.95	[123]P23
8	穿斗木屋架	云南丽江地震	1996	7	16.4	40	40.6	1.4	1.6		[5]
8	穿斗木屋架	云南宁蒗地震	1998	6.2	0	12.5	50	37.5	0	0.08	[123]P23
8	穿斗木屋架	云南姚安地震	2000	6.5	9.67	45.82	32.82	11.65	0.03	73.12	[123]P349
	IX度区
9	穿斗木屋架	云南武定地震	1995	6.5	0	24	25	38	13	2.3	[30]P195
9	穿斗木屋架	云南丽江地震	1996	7	0	4.3	28	52.6	15.2	344.2	[123]P22
9	穿斗木屋架	云南丽江地震	1996	7	0	14	31	42	13	5.99	[123]P23
9	穿斗木屋架	新疆巴楚-伽师地震	2003	6.8	0	0	30	50	20		[80]
	B,C: 砖砌体房屋
	结构形式	地震名称	年份	震级	基本完好	轻微破坏	中等破坏	严重破坏	毁坏	调查总数(万m2)	资料来源
	VI度区
6	多层砖房	海城地震	1975	7.3	45	45	10	0	0	20间	[130]P82
6	多层砖房	唐山地震	1976	7.8	45.5	38	11.9	4.6	0	3564间	[51]P14
6	多层砖房	唐山地震	1976	7.8	50.4	37.8	10.9	0.9	0	460间	[51]P17
6	砖混	普洱地震	1993	6.3	77	15	8	0	0		[30]P26
6	砖混	四川德格地震	1993	5	61	29.4	7.7	1.9	0	10.63	[30]P26
6	砖混	云南景谷-临沧-双江震群	1993	4.9	78	17	5	0	0	8.365	[30]P31
6	砖木	云南景谷-临沧-双江震群	1993	4.9	77	14	7	2	0	1.486	[30]P31
6	砖混	云南景谷-临沧-双江震群	1993	4.9	64.7	25.6	9.7	0	0	0.27	[30]P31
6	砖混	云南中甸地震	1993	5.6	65	31	4	0	0	29.3	[30]P36
6	砖混	四川沐川地震	1993	5	39.6	41.2	11.2	8	0	0.757	[30]P40
6	砖混	青海共和-兴海地震	1994	6	42.5	45.3	9.2	3	0	1	[30]P66
6	砖混	云南景谷地震	1994	5.2	88.8	11.2	0	0	0	0.553	[30]P105
6	砖混	云南沧源-澜沧地震	1995	5.1	72	20	8	0	0	1.64	[30]P142
6	砖混	新疆吉木乃地震	1995	5	48	36	9	7	0	4.71	[30]P157
6	砖混	云南孟连西中缅交界地震	1995	7.3	80	16	4	0	0	91.81	[30]P163
6	砖混	云南武定地震	1995	6.5	77	20	3	0	0		[30]P195
6	砖混	云南丽江地震	1996	7	77	20	3	0	0	85	[123]P23
6	砖混	云南勐腊-景洪地震	1997	5.1	78.9	15.2	5.9	0	0	6.35	[123]P104
6	砖混	云南景洪-江城地震	1997	5.5	67.1	32.9	0	0	0	3.7	[123]P109
6	砖混	重庆荣昌地震	1997	5.3	57	30	12	1	0	35	[123]P135
6	砖混	新疆阿合奇地震	1998	4.8	39.41	41.92	17.5	1.17	0	2.7	[123]P221
6	砖混	云南宁蒗地震	1998	5.3	73.84	18	8.17	0	0	34.4	[123]P226
6	砖混	云南宁蒗地震	1998	6.2	65.8	21.73	12.46	0	0	10.18	[123]P234
6	砖混	新疆拜城地震	1998	5.5	85.8	11.6	2.6	0	0	2.12	[123]P202
6	砖混	云南宣威地震	1998	5.1	92.6	6.97	0.43	0	0	112.98	[123]P241
6	砖混	重庆荣昌地震	1999	5	55	45	0	0	0	11.56	[123]P289
6	砖混	云南澄江地震	1999	5.2	67.5	32.5	0	0	0	74.71	[123]P312
6	砖混	四川绵竹汉旺地震	1999	5	86	10	4	0	0	1.54	[123]P329
6	砖混	甘肃景泰地震	2000	5.9	60	30	10	0	0	29.5	[123]P373
6	砖混	云南武定地震	2000	5.1	64.56	32.99	2.45	0	0	9.13	[123]P379
6	砖混	云南陇川西中缅边境地震	2000	5.8	67.34	32.26	0.4	0	0	26.88	[123]P389
6	砖混	青海杂多地震	2000	5.3	91.2	7.4	1.4	0	0	0.98	[123]P365
6	砖混	云南姚安地震	2000	6.5	89.72	9.03	1.25	0	0	222.03	[123]P349
6	砖混	云南丘北-弥勒地震	2000	5.5	84.84	15.16	0	0	0	53.99	[123]P355
6	多层砌体	云南永胜地震	2001	6	80.47	19.53	0	0	0		[88]
6	砖混	云南施甸地震	2001	5.2	44	48	8	0	0	0.05	[21]
6	多层砌体	云南澜沧地震	2001	5	62.03	37.97	0	0	0	8.4645	[12 5]P15
6	多层砌体	云南宁蒗-四川盐源地震	2001	5.8	70.33	28.32	0	0	0	8.9418	[125]P45
6	多层砌体	重庆荣昌地震	2001	4.9	55	45	0	0	0	55.1985	[125]P62
6	多层砌体	云南楚雄地震	2001	5.3	83.92	16.08	0	0	0	22.1708	[125]P67
6	多层砌体	云南江川地震	2001	5.1	91.57	8.43	0	0	0	48.62	[125]P79
6	砖混	四川盐源地震	2001	5.8	40	32	20	8	0	10.2705	[125]P35
6	砖混	四川仁寿-双流地震	2002	4.6	96.5	3.5	0	0	0	14.04	[108]
6	多层砖混	四川新龙地震	2002	5.3	95	5	0	0	0	2.9524	[125]P100
6	砖混	新疆乌恰地震	2002	5.7	73.24	17.9	8.86	0	0	24.5018	[125]P124
6	砖混平房	甘肃玉门地震	2002	5.9	67.4	32.59	0	0	0	0.3012	[12 5]P115
6	单层砖房	青海德令哈地震	2003	6.6	88	12	0	0	0	0.2846	[125]P173
6	多层砌体	云南大姚地震	2003	6.2	81.22	15.26	3.51	0	0	166.39	[125]P217
6	多层砌体	云南大姚地震	2003	6.1	80.9	15.8	3.3	0	0	19.5238	[125]P267
6	砖混	云南鲁甸地震	2003	5.1	67.28	27.2	4.85	0.67	0		[12 5]P313
6	砖混	云南鲁甸地震	2003	5.1	64.72	26.34	7.55	1.39	0		[12 5]P331
6	砖混平房	甘肃民乐-山丹地震	2003	6.1, 5.8	73.16	20.73	4.19	1.88	0	36.1991	[125]P279
6	砖混	云南鲁甸地震	2004	5.6	70.87	22.66	5.15	1.3	0	51.7246	[125]P402
6	砖混	云南双柏地震	2004	5	83.85	16.01	0.14	0	0	40.623	[125]P447
6	砖混	云南思茅地震	2005	5	76.23	19.28	1.79	2.69	0	29.5832	[125]P475
6	砖混	云南文山地震	2005	5.3	87.19	11.74‭	0.81	0.54	0	63.1474	[12 5]P521
6	砖混平房	广西平果-丹东地震	2005	4.6	84.22	‬0	15.26	0	0.51	18.335	[125]P538
6	砖混	云南宁洱地震	2007	6.4	74	26	0	0	0	120	[71]
6	砖混	云南宁洱地震	2007	6.4	93	7	0	0	0	475.1	[71]
6	成都砖混	汶川地震	2008	8	96.76	3.24	0	0	0	400栋	[161]P27
6	砖混	四川攀枝花地震	2008	6.1	43.6	35.9	17.9	2.6	0		[8]
6	砖混	云南姚安地震	2009	6	77.58	21.11	1.31	0	0	305.44	[70]
6	砖混	云南姚安地震	2009	6	81.13	18.87	0	0	0	103.488	[70]
6	砖混	新疆尼勒克-巩留交界地震	2011	6	85	13	2	0	0	144.284	[83]
6	砖混	新疆和硕地震	2012	5	32.3	67.7	0	0	0	5.1943	[7]
6	砖混	岷县漳县地震	2013	6.6‭	95.6	3.7	0.7	0	0		[73]
6	砖混	云南芦山地震	2013	‬7	73	27	0	0	0		[99]
6	砖混	新疆玉田地震	2014	7.3	88.9	10.5	0.6	0	0	131.3	[24][81]
6	砖混	四川康定地震	2014	6.3	70.77	27.05	2.18	0	0		[41]
6	砖混	云南鲁甸地震	2014	6.5	84.68	9.24	4.04	2.04	0	51.195	[58]
	VII度区
7	多层砖房	海城地震	1975	7.3	24.5	16	13.8	44.7	1	94间	[130]P82
7	多层砖房	海城地震	1975	7.3	56.5	25.2	12.8	5.5	0	1189	[130]P80
7	多层砖房	唐山地震	1976	7.8	43.5	21.7	21.7	13.1	0	23间	[51]P10
7	砖混	唐山地震	1976	7.8	41.6	25	16.7	16.7‭	0	12间	[51]P17
7	多层砖房	唐山地震	1976	7.8	67	17	8	‬8	0		[51]P14
7	天津市新楼	唐山地震	1976	7.8	61.3	26	7.8	4.5	0.4	129.7	[51]P203
7	天津市砖混	唐山地震	1976	7.8	70.7	19.5	9.8	0	0		[51]P14
7	天津市砖混	唐山地震	1976	7.8	79	16	5	0	0		[51]P14
7	天津市砖混	唐山地震	1976	7.8‭	64.7	23.5	11.8	0	0		[51]P14
7	砖混	西藏拉孜-昂仁地震	1993	‬6.6	12	38	32	18	0		[30]P24
7	砖混	青海共和-兴海地震	1994	6	5.8	29.1	38.5	24.8‭	1.8	1.33	[30]P66
7	砖混	云南孟连西中缅交界地震	1995	7.3	59	22	18	‬1	0	28.78	[30]P163
7	砖混	云南武定地震	1995	6.5	62	25	12	1	0	5.06	[30]P195
7	砖混	云南丽江地震	1996	7	62	25	12	1	0	13.12	[123]P23
7	砖混	云南景洪-江城地震	1997	5.5	51.1	27.8	14.4	6.7	0	2.5	[123]P109
7	砖混	云南宁蒗地震	1998	‬6.2	15.47	51.23	25.25	8.06	0	35.96	[123]P234
7	砖混	云南宣威地震	1998	5.1	66.09	21.74	12.17	0	0	1.74	[123]P241
7	砖混	重庆荣昌地震	1999	5	23	61	16	0	0	6.196	[123]P289
7	砖混	甘肃景泰地震	2000	5.9	20	58	12	10	0	1.1	[123]P373
7	砖混	云南姚安地震	2000	6.5	66.4	29.79	3.68	0.14	0	56.16	[123]P349
7	砖混	云南施甸地震	2001	5.2	26.9	23.1	38.5	11.55	0	0.13	[21]
7	砖混	四川盐源地震	2001	5.8	11	25	36	18	10	2.5275	[125]P35
7	砖混平房	甘肃玉门地震	2002	5.9	95.23	4.76	0	0	0	0.294	[125]P115
7	砖混	新疆巴楚-伽师地震	2003	6.8	58.5	30.2	7.6	3.7	0		[80]
7	多层砌体	云南大姚地震	2003	6.2	57.38	26.72	14.72	1.15	0	20.134	[125]P217
7	多层砌体	云南大姚地震	2003	6.1	54.99	31.83	13.18	0	0	1.2874	[125]P267
7	砖混	云南鲁甸地震	2003	5.1	37.69	37.83	6.91	17.35	0.22		[125]P313
7	砖混	云南鲁甸地震	2003	5.1	35.18	27.69	15.06	21.82	0.21		[12 5]P331
7	砖混平房	甘肃民乐-山丹地震	2003	6.1, 5.8	53.47	30.03	8.96	7.53	0	27.7257	[125]P279
7	砖混	云南鲁甸地震	2004	5.6	24.44	36.5	28.04	11.02	0	20.382	[125]P402
7	砖混	云南宁洱地震	2007	6.4	17	65	18	0	0	18.5	[71]
7	砖混	汶川地震	2008	8	54.7	26.4	10.58	5.37	2.95		[114]
7	砖混	四川攀枝花地震	2008	6.1	28.1	31.3	21.9	12.5	6.3		[8]
7	砖混	云南姚安地震	2009	6	52.05	38.16	9.79	0	0	64.2967	[70]
7	砖混	云南姚安地震	2009	6	54.76	26	18.46	0.78	0	80.7568	[70]
7	砖混	青海玉树地震	2010	7.1	67	20	13	0	0		[67]
7	砖混	新疆尼勒克巩留交界	2011	6	69	23	8	0	0	102.511	[83]
7	砖混	岷县漳县地震	2013	6.6	51.8	27.7	14.2‭	1	1.2		[73]
7	砖混	云南芦山地震	2013	7	61	19	8	‬11	0		[99]
7	砖混	新疆玉田地震	2014	7.3	67.5	30.4	2.1	0	0		[24][81]
7	砖混	四川康定地震	2014	6.3	53.73	33.5	9.57	3.2	0		[41]
7	砖混	云南鲁甸地震	2014	6.5	48.04	36.72	9.7	4.16	1.39	2.165	[58]
	VIII度区
8	多层砖房	海城地震	1975	7.3	28.9	21.1	28.9	21.1	0	90间	[130]P82
8	多层砖房	海城地震	1975	7.3	33	28	26	13	0	362	[130]P80
8	多层砖房	唐山地震	1976	7.8	11.8	35.3	29.4	23.5	0	17间	[51]P12
8	天津市旧楼	唐山地震	1976	7.8	24	24.3	21.7	14.8	15.2	23.23万间	[51]P203
8	多层砖房	唐山地震	1976	7.8	24.1	24.2	21.7	14.8	15.2		[51]P14
8	多层砖房	唐山地震	1976	7.8	38.1	21.4	19.7	19.6	1.2‭	168间	[51]P14
8	多层砖房	唐山地震	1976	7.8	51	20.9	12.8	15.3	‬0	40.7	[51]P14
8	砖混	云南丽江地震	1996	7	19	33.7	36.4	8.7	2.2	17.9	[123]P23
8	砖混	云南宁蒗地震	1998	6.2	0	16.67	58.33	25	0	0.032	[123]P234
8	砖混	云南姚安地震	2000	6.5	18.08	48.81	24.2	8.91	0		[158]
8	砖混	云南姚安地震	2000	6.5	16.19	59.49	19.66	4.66	0	92.28	[123]P349
8	砖混	新疆巴楚-伽师地震	2003	6.8	25.5	34.5	27.5	12	0.5	2.6074	[80]
8	多层砌体	云南大姚地震	2003	6.2	10.92	29.1	46.43	12.82	0.7	0.178	[125]P217
8	多层砌体	云南大姚地震	2003	6.1	11.59	32.88	42.86	12.68	0	2.766	[125]P267
8	砖混	新疆昭苏地震	2003	6.1	0	1.02	2.09	30.7	66.19	10.9593	[125]P341
8	砖混平房	甘肃民乐-山丹地震	2003	6.1, 5.8	19.56	55.65	15.97	7.4	1.39	84.99	[125]P279
8	砖混	云南宁洱地震	2007	6.4	23	42	21	12	2	11.75	[71]
8	砖混	云南宁洱地震	2007	6.4	8	20	37	33	2	118间	[71]
8	砖混	云南宁洱地震	2007	6.4	20.4	25.4	23.7	17.5	13	36.085	[107]
8	砖混	云南宁洱地震	2007	6.4	18	35	26	19	2		[59]
8	砖混	四川攀枝花地震	2008	6.1	4.3	17.4	26.1	34.8	17.4	13.3443	[8]
8	砖混	云南姚安地震	2009	6	28.36	55.49	10.58	5.57	0		[70]
8	砖混	青海玉树地震	2010	7.1	39	0	61	0	0		[67]
8	砖混	云南芦山地震	2013	7	3	51	18	24	5		[99]
8	砖混	岷县漳县地震	2013	6.6	45	36.4	11.6	4.8	2.2	8.895	[73]
8	砖混	云南鲁甸地震	2014	6.5	8.83	21.57	25.58	24.76	19.27	3.679	[58]
8	砖混	云南鲁甸地震	2014	6.5	14.57	26.66	37.4	15.66	5.71		[58]
	IX度区
9	多层砖房	海城地震	1975	7.3	2.8	19.2	32	30	16	158	[130]P80
9	多层砖房	海城地震	1975	7.3	6.7	12.5	16.4	56.7	7.7	104间	[130]P82
9	多层砖房	唐山地震	1976	7.8	1.3‭	6.8	34.3	32.5	25.1	382间	[51]P12
9	砖混	唐山地震	1976	7.8	‬1.2	7	26.2	37.1	28.5	256间	[51]P17
9	多层砌体	云南武定地震	1995	6.5	19.8	16.5	14.5	38.1	11	0.91	[30]P195
9	砖混	云南丽江地震	1996	7	16.8	19.6	14.5	38.1	11	2.37	[123]P23
9	砖混	汶川地震	2008	8	0.47	6.49	44.95	18.77	29.32		[161]P29
9	砖混	青海玉树地震	2010	7.1	60	20	15	5	0		[67]
9	砖混	云南芦山地震	2013	7	5	7	30	48	9		[99]
9	砖混	云南芦山地震	2013	7	15	12	15	53	5	0.55	[98]
9	砖砼tong	云南芦山地震	2013	7	0	0	23	77	0	0.04	[98]
	X度区
10	多层砖房	唐山地震	1976	7.8	0.6	5	6.5	19.9	68	337间	[51]P12
10	多层砖混	唐山地震	1976	7.8	0	0	0	10	90	10间	[51]P17
	XI度区
11	多层砖房	唐山地震	1976	7.8	0.3	1.5	4.7	11.7	81.8	952间	[51]P12
11	砖混	唐山地震	1976	7.8	0.25	2.63	7.13	15.64	74.35	799间	[51]P17
	D: 钢筋混凝土房屋
	结构形式	地震名称	年份	震级	基本完好	轻微破坏	中等破坏	严重破坏	毁坏	调查总数(万m2)	资料来源
	VI度区
6	框架	云南景谷-临沧-双江震群	1993	4.9	66.3	34.7	0	0	0	0.15	[30]P31
6	框架	普洱地震	1993	6.3	83	16	1	0	0		[30]P16
6	框架	云南景谷-临沧-双江震群	1993	4.9	100	0	0	0	0	0.224	[30]P31
6	框架	云南中甸地震	1993	5.6	72	23	5	0	0	3.9	[30]P36
6	框架	云南景谷地震	1994	5.2	100	0	0	0	0	0.4	[30]P105
6	框架	云南沧源-澜沧地震	1995	5.1	100	0	0	0	0	0.155	[30]P142
6	框架	云南孟连西中缅交界地震	1995	7.3	85.5	13	1.5	0	0	28栋	[30]P163
6	框架	云南武定地震	1995	6.5	89	11	0	0	0	4.55	[30]P195
6	框架	云南丽江地震	1996	7	85	15	0	0	0	12	[123]P23
6	框架	云南勐腊-景洪地震	1997	5.1	87	13	0	0	0	4.6	[123]P104
6	框架	云南宁蒗地震	1998	5.3	61.6	32.35	6.05	0	0	15.16	[123]P226
6	框架	云南宁蒗地震	1998	6.2	67.72	23.19	9.09	0	0	5.8	[123]P234
6	框架	云南宣威地震	1998	5.1	90.74	9.26	0	0	0	175.47	[123]P241
6	框架	四川绵竹汉旺地震	1999	5	90	6	4	0	0	1.378	[123]P329
6	框架	云南澄江地震	1999	5.2	80.4	19.6	0	0	0	26.99	[123]P312
6	框架	重庆荣昌地震	1999	5	58	42	0	0	0	2.122	[123]P289
6	框架	云南陇川西中缅边境地震	2000	5.8	71.3	28.7	0	0	0	4.6	[123]P389
6	框架	云南丘北-弥勒地震	2000	5.5	96.1	3.9	0	0	0	4.945	[123]P355
6	框架	云南武定地震	2000	5.1	68.15	31.85	0	0	0	3.988	[123]P379
6	框架	云南姚安地震	2000	6.5	85.92	14.08	0	0	0	69.43	[123]P349
6	框架	云南楚雄地震	2001	5.3	95.16	4.84	0	0	0	3.9219	[125]P67
6	框架	云南江川地震	2001	5.1	88.83	11.17	0	0	0	4.1	[125]P79
6	框架	云南宁蒗-四川盐源地震	2001	5.8	74	26	0	0	0	1.8398	[125]P45
6	框架	云南永胜地震	2001	6	89.89	10.11	0	0	0		[88]
6	框架	重庆荣昌地震	2001	4.9	58	42	0	0	0	8.3021	[125]P62
6	框架	四川新龙地震	2002	5.3	95	0	0	0	0	2.6011	[125]P100
6	框架	云南大姚地震	2003	6.2	78.9	19.72	1.37	0	0	16.0934	[125]P217
6	框架	云南大姚地震	2003	6.1	74.54	23.37	2.1	0	0	3.1418	[125]P267
6	框架	云南鲁甸地震	2003	5.1	76.62	21.38	2	0	0		[125]P313
6	框架	云南鲁甸地震	2003	5	67.94	23.79	8.25	0	0		[125]P331
6	框架	云南鲁甸地震	2004	5.6	74.8	24.82	0.37	0	0	2.1472	[125]P402
6	框架	云南双柏地震	2004	5	89.61	10.39	0	0	0	14.588	[125]P447
6	框架	云南思茅地震	2005	5	83.82	16.18	0	0	0	1.6416	[125]P475
6	框架	云南文山地震	2005	5.3	89.37	10.63	0	0	0	4.4148	[125]P521
6	框架	云南宁洱地震	2007	6.4	82	18	0	0	0	350.44	[71]
6	框架	云南宁洱地震	2007	6.4	87	13	0	0	0	29.84	[71]
6	框架	四川攀枝花地震	2008	6.1	51.4	37.8	10.8	0	0		[8]
6	框架	汶川地震	2008	8	96.87	3.13	0	0	0	400栋	[161]P27
6	框架	云南姚安地震	2009	6	78.85	19.74	1.41	0	0	70.3289	[70]
6	框架	云南姚安地震	2009	6	83.11	16.89	0	0	0	35.5297	[70]
6	框架	新疆尼勒克-巩留交界地震	2011	6	86	14	0	0	0	0.1167	[83]
6	框架	四川康定地震	2014	6.3	87.5	12.5	0	0	0		[41]
6	框架	云南鲁甸地震	2014	6.5	91.65	7.13	1.22	0	0	34.566	[58]
	VII度区
7	框架	云南武定地震	1995	6.5	82	16	2	0	0	2.89	[30]P195
7	框架	云南孟连西中缅交界地震	1995	7.3	80	16	4	0	0	9.142	[30]P163
7	框架	云南丽江地震	1996	7	68	25	7	0	0	4.13	[123JP23
7	框架	云南景洪-江城地震	1997	5.5	53.1	26.4	14.5	6	0	2	[123JP109
7	框架	云南姚安地震	2000	6.5	62.23	31.05	6.73	0	0	37.19	[123JP349
7	框架	云南永胜地震	2001	6	74.55	18.37	7.08	0	0		[88]
7	框架	云南施甸地震	2001	5.2	55.1	32.1	12.8	0	0	0.078	[21]
7	框架	云南大姚地震	2003	6.2	58.18	41.81	0	0	0	6.4942	[125]P217
7	框架	云南大姚地震	2003	6.1	65.68	34.32	0	0	0	0.08	[125]P267
7	绵阳框架	汶川地震	2008	8	68.93	17.76	12.62	0.69	0	199栋	[114]
7	德阳框架	汶川地震	2008	8	74.48	19.32	2.94	3.26	0	199栋	[114]
7	德阳框架	汶川地震	2008	8	65.92	17.04	13.33	3.71	0	135栋	[114]
7	框架	汶川地震	2008	8	92.3	5.27	2.13	0.3	0		[161JP29
7	框架	四川攀枝花地震	2008	6.1	45.5	36.4	13.6	4.5	0		[8]
7	框架	云南姚安地震	2009	6	64.65	23.57	11.78	0	0	5.4043	[70]
7	框架	云南姚安地震	2009	6	59.59	25.55	14.46	0.4	0	23.5968	[70]
7	框架	新疆尼勒克-巩留交界地震	2011	6	72	28	0	0	0	25.9373	[83]
7	框架	云南鲁甸地震	2014	6.5	55.56	44.44	0	0	0	0.36	[58]
7	框架	四川康定地震	2014	6.3	49.1	46.92	4.07	0	0		[41]
	VIII度区
8	框架	云南丽江地震	1996	7	26	43	26	5	0	6.63	[123]P23
8	框架	云南姚安地震	2000	6.5	26.96	59.92	13.12	0	0		[158]
8	框架	云南大姚地震	2003	6.1	0	100	0	0	0		[125]P267
8	框架	云南宁洱地震	2007	6.4	53	38	6	3	0	58.58	[71]
8	框架	云南宁洱地震	2007	6.4	48	37	9	5	1	20.454	[59]
8	什邡框架	汶川地震	2008	8	46.78	30.12	20.7	2.4	0	74栋	[114]
8	框架	四川攀枝花地震	2008	6.1	42.9	28.6	14.3	14.3	0		[8]
8	框架	云南姚安地震	2009	6	50	31.9	12.86	5.24	0	1.6917	[70]
8	框架	云南鲁甸地震	2014	6.5	47.76	31.78	20.46	0	0	2.7406	[58]
	IX度区
9	框架	云南丽江地震	1996	7	21	34	33	12	0	0.29	[123]P23
9	绵竹框架	汶川地震	2008	8	27.71	24.1	24.1	20.48	3.61	83栋	[114]
9	安县框架	汶川地震	2008	8	18.75	46.87	21.87	9.38	3.13	64栋	[114]
9	框架	云南鲁甸	2014	6.5	11.15	23.03	34.08	22.84	8.9	5.6185	[58]
