# Supplementary material for: Review article: Review of fragility analyses for major building types in China with new implications for intensity–PGA relation development
Source: Copernicus journal article supplement (doi:10.5194/nhess-20-643-2020), 2020-02-27
Supplement: Supplementary file 3 [file nhess-20-643-2020-supplement.zip]

Archive with 17 entries (15 files):
- nhess-20-643-2020-supplement-title-page.pdf
- supplements_20190528/
- supplements_20190528/[step4]China_fragility_output_database.xlsx
- supplements_20190528/[step2]China_fragility_discrete_records.xlsx
- supplements_20190528/EQ_list_with_field_survey.xlsx
- supplements_20190528/Supplementary_building_classification_details.pdf
- supplements_20190528/[step3]China_fragility_classification.xlsx
- supplements_20190528/data_Fig3-4/
- supplements_20190528/data_Fig3-4/Masonry_A_PGA(g)_fragility.txt
- supplements_20190528/data_Fig3-4/RC_B_Intensity_fragility.txt
- supplements_20190528/data_Fig3-4/masonry_A_Intensity_fragility.txt
- supplements_20190528/data_Fig3-4/masonry_B_Intensity_fragility.txt
- supplements_20190528/data_Fig3-4/RC_B_PGA(g)_fragility.txt
- supplements_20190528/data_Fig3-4/Masonry_B_PGA(g)_fragility.txt
- supplements_20190528/data_Fig3-4/RC_A_PGA(g)_fragility.txt
- supplements_20190528/data_Fig3-4/RC_A_Intensity_fragility.txt
- supplements_20190528/[step1]China_fragility_literature_review.xlsx
