# Supplementary material for: Review article: Review of fragility analyses for major building types in China with new implications for intensity–PGA relation development
Source: Copernicus journal article supplement (doi:10.5194/nhess-20-643-2020), 2020-02-27
Supplement: Supplementary file 3 [file nhess-20-643-2020-supplement.zip › supplements_20190528/[step2]China_fragility_discrete_records.xlsx]

## Sheet: soil-wood
collapse	serious damage	medium damage	slight damage	no damage
0.3033	0.6695			0.0272	8		Zhou et al.	2011
0.004	0.107	0.367	0.374	0.148	6		Chang et al.	2012
0.355	0.397	0.164	0.057	0.027	8		Shi et al.	2013
0.14	0.213	0.255	0.236	0.156	7
0.033	0.06	0.105	0.194	0.608	6
0.0111	N/A	0.2725	N/A	0.7164	6		Ming et al.	2017
0.0901	N/A	0.5174	N/A	0.3925	7
0.3182	N/A	0.5734	N/A	0.1084	8
0.6565	N/A	0.3435	N/A	0	9
0.0117	0.2771			0.7118	6		He et al.	2016
0.086	0.5375			0.3763	7
0.2881	0.607			0.1055	8
0.591	0.409			0	9
0	0.03	0.15	0.32	0.5	6		Qiu & Gao	2015
0.075	0.134	0.256	0.34	0.195	7
0.282	0.28	0.29	0.07	0.078	8
0.602	0.17	0.165	0.037	0.026	9
0.878	0.095	0.02	0.007	0	10
0.53	0	0.46	0	0.01	8		Shi et al.	2007
0	0	0.11	0	0.89	6
0.59	0	0.41	0	0.01	8
0.18	0	0.49	0	0.33	7
0.01	0	0.28	0	0.71	6
0.025	0.165	0.225	0.265	0.325	6		Wang, master	2007
0.19	0.26	0.2	0.185	0.165	7
0.375	0.27	0.165	0.12	0.07	8
0.5	0.25	0.14	0.085	0.025	9
0.73	0.17	0.075	0.015	0	10
78.75	21.25			0	10		Yuan	2008
68.83	28.19			0	9
20.06	47.37			32.57	8
8.86	25.78			65.36	7
0.0338	0.1294	0.1739	0.2522	0.4104	7		Wang	2008
0.4274	0.272	0.1748	0.1101	0.0155	8
1	0	0	0	0	9
0.0117	0.2771			0.7118	6		Yang	2017
0.086	0.5375			0.3763	7
0.2881	0.607			0.1055	8
0.591	0.409			0	9
0.0277	0.166			0.8182	6
0.0242	0.2009			0.7749	7
0.5872	0.3788			0.0341	8
0.0225	0.0093	0.1001	0.2433	0.6915	6	VII fortification
0.0392	0.0642	0.2213	0.3495	0.4056	7
0.1446	0.1901	0.3731	0.3211	0.0563	8
0.0095	0.0117	0.0939	0.2679	0.661	6	VIII fortification
0.006	0.0611	0.2102	0.3497	0.3757	7
0.017	0.2143	0.3993	0.296	0.0763	8
0.118	0.144	0.188	0.218	0.332	6		Wen et al.	2017
0.505	0.176	0.166	0.101	0.052	7
0.681	0.103	0.093	0.085	0.038	8
0	0.03	0.13	0.28	0.56	6		Piao, master	2013
0.05	0.18	0.26	0.31	0.2	7
0.22	0.33	0.32	0.08	0.05	8
0.52	0.28	0.17	0.025	0.005	9
0.9	0.09	0.01	0	0	10
0	0.07	0.16	0.27	0.5	6
0.08	0.22	0.23	0.3	0.17	7
0.26	0.37	0.31	0.05	0.01	8
0.62	0.31	0.07	0	0	9
0.94	0.06	0	0	0	10
0	0.05	0.16	0.3	0.49	6
0.07	0.21	0.28	0.33	0.11	7
0.31	0.35	0.26	0.06	0.02	8
0.55	0.3	0.12	0.03	0	9
0.93	0.07	0	0	0	10
0	0.01	0.08	0.25	0.66	6
0	0.04	0.26	0.37	0.33	7
0.08	0.23	0.34	0.26	0.09	8
0.21	0.52	0.18	0.09	0	9
0.65	0.26	0.09	0	0	10
0	0.02	0.15	0.28	0.55	6		Sun et al.	2012
0.04	0.2	0.25	0.33	0.18	7
0.2	0.34	0.32	0.1	0.04	8
0.51	0.28	0.19	0.02	0	9
0.89	0.105	0.005	0	0	10
0	0.02	0.12	0.29	0.57	6
0.04	0.17	0.25	0.31	0.23	7
0.19	0.3	0.33	0.1	0.08	8
0.5	0.27	0.19	0.03	0.01	9
0.87	0.1	0.03	0	0	10
0	0.02	0.12	0.29	0.57	6
0.04	0.17	0.25	0.31	0.23	7
0.19	0.3	0.33	0.1	0.08	8
0.5	0.27	0.19	0.03	0.01	9
0.87	0.1	0.03	0	0	10
0.02	0.16	0.23	0.27	0.33	6		Chen et al.	1999	analytical using Yin(1995)
0.18	0.2	0.26	0.19	0.17	7
0.37	0.27	0.17	0.12	0.07	8
0.74	0.18	0.07	0.01	0	9
0.0001	0.0065	0.0695	0.2584	0.6656	6		Zhou et al.	2007
0.003	0.0597	0.1971	0.353	0.3871	7
0.0417	0.1992	0.3784	0.3117	0.0702	8
0.15	0.4415	0.263	0.146	0	9
0.063	0.191	0.47	0.76		0.1	PGA, <0.05g fortification, raw soil and stone	Fang, book	2011
0.24	0.487	0.77	0.94		0.2
0.41	0.67	0.89	0.98		0.3
0.55	0.78	0.93	0.99		0.4
0.65	0.85	0.96	0.99		0.5
0.73	0.89	0.98	1		0.6
0.79	0.92	0.99	1		0.7
0.84	0.95	0.99	1		0.8
0.86	0.96	0.99	1		0.9
0.89	0.97	1	1		1
0	0	0	0.6299	0.3701	6.5		Guo	2011	analytical using fuzzy method
0	0	0.1538	0.5905	0.2557	7.5
0	0.0701	0.31031	0.3839	0.2357	8.5
0	0.1276	0.3754	0.2944	0.2027	9
0	0.2094	0.3505	0.4401	0	10
0.025	0.165	0.225	0.265	0.325	6		Yin	1996
0.19	0.26	0.2	0.185	0.165	7
0.375	0.27	0.165	0.12	0.07	8
0.5	0.25	0.14	0.085	0.025	9
0.735	0.175	0.075	0.015	0	10

## Sheet: brick-wood
collapse	serious damage	medium damage	slight damage	no damage		notes
0.3534	0.6207			0.0259	8		Zhou et al.	2011
0	0	0.028	0.136	0.836	6		Chang et al.	2012
0.142	0.239	0.281	0.259	0.079	8		Shi et al.	2013
0.029	0.077	0.189	0.418	0.287	7
0.006	0.012	0.053	0.239	0.69	6
0.002	0.049	0.085	0.348	0.516	7		Ge et al.	2014
0	0.014	0.048	0.141	0.797	6
0.0077	N/A	0.2359	N/A	0.7564	6		Ming et al.	2017
0.0591	N/A	0.519	N/A	0.4219	7
0.2867	N/A	0.6107	N/A	0.1026	8
0.6107	N/A	0.3817	N/A	0.0076	9
0.0087	0.2407			0.7517	6		He et al.	2016
0.0571	0.5303			0.4126	7
0.2391	0.6563			0.1046	8
0.53	0.47			0	9
0.0028	0.0417	0.1353	0.3557	0.4645	6		Wu, master	2015
0.0483	0.1291	0.2325	0.2804	0.3097	7
0.1978	0.2586	0.2218	0.1445	0.1773	8
0.2	0.5	0.3	0	0	9
0	0.009	0.057	0.205	0.729	6		Qiu & Gao	2015
0.039	0.121	0.241	0.288	0.311	7
0.118	0.36	0.264	0.173	0.085	8
0.438	0.281	0.211	0.056	0.014	9
0.598	0.265	0.163	0.027	0.007	10
0.0236	0.3514			0.625	6		Ye et al.	2017
0.1098	0.4424			0.4478	7
0.3182	0.5847			0.0971	8
0.5033	0.4967			0	9
0	0	0.053	0.18	0.767	6	single-story	Li et al.	2013
0	0.053	0.18	0.66	0.106	7
0.041	0.173	0.646	0.129	0.011	8
0.166	0.678	0.135	0.02	0	9
0.25	0	0.7	0	0.05	8		Shi et al.	2007
0	0	0.18	0	0.82	6
0.55	0	0.4	0	0.05	8
0.01	0	0.88	0	0.11	7
0	0	0.26	0	0.73	6
0.0182	0.0676	0.1505	0.2715	0.49	6		Wang, master	2007
0.0836	0.2027	0.2207	0.2129	0.28	7
0.1828	0.3022	0.2309	0.1633	0.12	8
0.3767	0.2608	0.1766	0.1053	0.08	9
0.6384	0.1721	0.1191	0.0481	0.022	10
77.33	22.67			0	10		Yuan	2008
40.84	41.73			17.43	9
10.65	35.48			53.87	8
3.68	20.86			75.46	7
0	0.055	0.192	0.281	0.472	7		Wang	2008
0	0.25	0.4	0.25	0.1	8
0.2	0.5	0.3	0	0	9
0.0182	0.0676	0.1505	0.2715	0.49	6	1-layer dwellig house	He & Fu	2009
0.0836	0.2027	0.2207	0.2129	0.28	7
0.1828	0.3022	0.2309	0.1633	0.12	8
0.3767	0.2608	0.1766	0.1053	0.08	9
0.6384	0.1721	0.1191	0.0481	0.022	10
0.0087	0.2407			0.7517	6		Yang et al.	2017
0.0571	0.5303			0.4126	7
0.2391	0.6563			0.1046	8
0.53	0.47			0	9
0.007	0.1649			0.8328	6
0.007	0.2154			0.7789	7
0.4261	0.5183			0.0556	8
0.0813953	0.104651	0.290698	0.232558	0.290698	6	VII fortification
0.0402	0.0649	0.2816	0.3288	0.4207	7
0.16	0.2	0.24	0.2	0.2	8
0.0128	0.0171	0.0665	0.214	0.7466	6	VIII fortification
0.0123	0.0465	0.1797	0.3532	0.4292	7
0.0025	0.135	0.365	0.425	0.0725	8
0.01	0.022	0.046	0.081	0.841	6		Wen et al.	2017
0.051	0.095	0.157	0.244	0.453	7
0.144	0.151	0.176	0.227	0.302	8
0.01	0.04	0.11	0.26	0.58	6		Piao, master	2013
0.03	0.07	0.3	0.33	0.27	7
0.12	0.27	0.37	0.21	0.03	8
0.3	0.55	0.1	0.05	0	9
0.71	0.25	0.04	0	0	10
0	0.01	0.09	0.27	0.63	6		Sun et al.	2012
0	0.05	0.29	0.37	0.29	7
0.09	0.25	0.36	0.24	0.06	8
0.23	0.51	0.18	0.08	0	9
0.66	0.27	0.07	0	0	10
0	0.01	0.08	0.25	0.66	6
0	0.04	0.26	0.37	0.33	7
0.08	0.23	0.34	0.26	0.09	8
0.21	0.52	0.18	0.09	0	9
0.65	0.26	0.09	0	0	10
0	0.005	0.085	0.24	0.67	6
0	0.03	0.25	0.38	0.34	7
0.07	0.24	0.33	0.27	0.09	8
0.2	0.53	0.17	0.1	0	9
0.64	0.26	0.1	0	0	10
0.0002	0.0041	0.0488	0.2251	0.7217	6		Zhou et al.	2007
0.0008	0.0322	0.2133	0.3382	0.4154	7
0.0121	0.1789	0.365	0.3625	0.1392	8
0.13	0.4	0.28	0.19	0	9
0.025	0.084	0.29	0.6		0.1	PGA, <0.05g fortification	Fang, book	2011
0.122	0.289	0.6	0.86		0.2
0.24	0.48	0.77	0.94		0.3
0.36	0.62	0.86	0.97		0.4
0.47	0.71	0.91	0.98		0.5
0.56	0.78	0.94	0.99		0.6
0.63	0.83	0.96	0.99		0.7
0.69	0.87	0.98	0.99		0.8
0.73	0.9	0.98	0.99		0.9
0.78	0.92	0.99	0.99		1
0.0182	0.0676	0.1505	0.2715	0.49	6		Yin	1996
0.0836	0.2027	0.2207	0.2129	0.28	7
0.1828	0.3022	0.2309	0.1633	0.12	8
0.3767	0.2608	0.1766	0.1053	0.08	9
0.6384	0.1721	0.1191	0.0481	0.022	10

## Sheet: brick-concrete
collapse	serious damage	medium damage	slight damage	no damage
0.0201	0.0844	0.3868	0.3418	0.1669	8		Zhou et al.	2011
0	0	0	0.677	0.323	6		Chang et al.	2012
0.022	0.048	0.116	0.364	0.45	8		Shi et al.	2013
0.012	0.051	0.142	0.277	0.518	7
0	0	0.007	0.037	0.956	6
0	0	0.021	0.304	0.675	7		Ge et al.	2014
0	0	0.006	0.105	0.889	6
0.0002	0.0029	0.0221	0.1933	0.7815	6		Ming et al.	2017
0.0039	0.0421	0.137	0.3302	0.4868	7
0.0371	0.1359	0.3072	0.3339	0.1859	8
0.1711	0.3367	0.2496	0.1321	0.1105	9
0.0003	0.0032	0.0252	0.1942	0.7808	6		He et al.	2016
0.0044	0.0505	0.138	0.3283	0.4849	7
0.0242	0.1279	0.3145	0.3547	0.1805	8
0.11	0.3815	0.145	0.1805	0.183	9
0.67	0.3	0.03	0	0	10
0	0	0.06	0.11	0.83	6		Chen et al.	2017
0	0	0.09	0.15	0.76	7
0	0	0.06	0.11	0.83	6
0	0	0.16	0.32	0.52	7
0	0.06	0.12	0.44	0.38	8
0	0.007	0.039	0.199	0.755	6		Qiu & Gao	2015
0.031	0.119	0.231	0.278	0.341	7
0.109	0.359	0.254	0.163	0.115	8
0.437	0.28	0.21	0.055	0.018	9
0.597	0.264	0.102	0.026	0.011	10
N/A	0.6667	N/A	0.3333	N/A	6	unfortificated mansory	Sun & Zhang	2012
0.0189	0.117	0.2528	0.3245	0.2868	7
0.1012	0.3452	0.2083	0.25	0.0952	8
0.1088	0.5649	0.1925	0.0711	0.0628	9
0.2549	0.3137	0.1373	0.1961	0.098	10
0.4203	0.3188	0.087	0.1014	0.0725	11
0	0.2	0.6	N/A	0.2	6	fortificated mansory
0.0046	0.0456	0.1626	0.3526	0.4347	7
0.0139	0.2282	0.2787	0.2578	0.2213	8
0.0868	0.3529	0.2997	0.1625	0.098	9
0.0345	0.1379	0.2529	0.2529	0.3218	10
0.013	0.3421	0.0921	0.2237	0.3291	11
0.013	0.0514	0.1295	0.3032	0.5129	6	mansory	Li et al.	2013
0.0547	0.1163	0.1764	0.253	0.4016	7
0.1291	0.1985	0.2211	0.2084	0.2429	8
0.2586	0.2768	0.21	0.1482	0.1064	9
0	0	0.02	0.14	0.84	6		Wei et al.	2008
0	0.01	0.05	0.66	0.28	7
0.01	0.044	0.62	0.28	0.046	8
0.07	0.6	0.27	0.05	0.01	9
0.53	0.38	0.09	0	0	10
0.02	0.12	0.21	0.42	0.23	8		Shi et al.	2007
0	0	0	0.07	0.93	6
0.02	0.33	0.37	0.2	0.08	8
0	0	0.18	0.65	0.17	7
0	0	0	0.26	0.74	6
0.0017	0.0136	0.0542	0.2608	0.6697	6		Wang, master	2007
0.0096	0.036	0.0897	0.2311	0.6337	7
0.031	0.0825	0.1627	0.2412	0.4825	8
0.089	0.1608	0.2339	0.2297	0.2867	9
0.2506	0.2805	0.2443	0.1404	0.0842	10
0.0027	0.021	0.0761	0.2923	0.6079	6	mansory with VI fortification	Hu et al.	2007
0.0155	0.0569	0.1301	0.2711	0.5264	7
0.0501	0.1274	0.2189	0.2621	0.3416	8
0.1391	0.2322	0.2667	0.2107	0.1512	9
0.363	0.1391	0.2038	0.0773	0.0243	10
29.32	18.77	44.95	6.49	0.47	10		Yuan	2008
10.81	21.89	23.73	19.26	24.31	9
2.95	5.37	26.4	10.58	54.7	8
0.91	1.94	4.32	10.28	82.55	7
0	0.037	0.076	0.302	0.585	7		Wang	2008
0.005	0.12	0.275	0.345	0.255	8
0.021	0.348	0.206	0.17	0.255	9
0	0.0124	0.3003	0.3568	0.3305	6		Meng et al.	2012	analytical using Yin(1995)
0	0.0659	0.5706	0.192	0.1715	7
0.0125	0.5125	0.3122	0.1234	0.0394	8
0.0443	0.6582	0.1989	0.0986	0	9
0.2831	0.5414	0.1755	0	0	10
0.0027	0.021	0.0761	0.2923	0.6079	6	VI fortification	He & Fu	2009
0.0155	0.0569	0.1301	0.2711	0.5264	7
0.0501	0.1274	0.2189	0.2621	0.3416	8
0.1391	0.2322	0.2667	0.2107	0.1512	9
0.363	0.3315	0.2038	0.0773	0.0243	10
0.0017	0.0136	0.0542	0.2608	0.6697	6	VII fortification
0.0096	0.036	0.0897	0.2311	0.6337	7
0.031	0.0825	0.1627	0.2412	0.4825	8
0.089	0.1608	0.2339	0.2297	0.2867	9
0.2506	0.2805	0.2443	0.1404	0.0842	10
0.0012	0.0087	0.0356	0.2098	0.7448	6	VIII fortification
0.0064	0.0223	0.0562	0.1717	0.7434	7
0.0196	0.0501	0.1049	0.1855	0.6399	8
0.0546	0.0992	0.1679	0.1987	0.4796	9
0.1568	0.1966	0.2249	0.1858	0.2359	10
0.0182	0.0676	0.1505	0.2715	0.49	6	No fortification
0.0836	0.2027	0.2207	0.2129	0.28	7
0.1828	0.3022	0.2309	0.1633	0.12	8
0.3767	0.2608	0.1766	0.1053	0.08	9
0.6384	0.1721	0.1191	0.0481	0.022	10
0.0003	0.0032	0.0252	0.1942	0.7808	6		Yang et al.	2017
0.0044	0.0505	0.138	0.3283	0.4849	7
0.0242	0.1279	0.3145	0.3547	0.1805	8
0.11	0.3815	0.145	0.1805	0.183	9
0.67	0.3	0.03	0	0	10
0	0.0072	0.0187	0.1329	0.85	6
0	0.0006	0.0132	0.1987	0.7877	7
0.0591	0.139	0.2161	0.3664	0.2194	8
0.0054	0.019	0.0518	0.2176	0.7615	6	VII fortification
0.0123	0.0753	0.1407	0.32	0.479	7
0.0406	0.1422	0.32	0.3457	0.1963	8
0.0014	0.0091	0.0392	0.1945	0.7932	6	VIII fortification
0.0184	0.0232	0.155	0.2846	0.5457	7
0.022	0.087	0.364	0.337	0.19	8
0	0	0	0.084	0.916	6	EQ-housing project	Wen et al.	2017
0	0	0.047	0.26	0.693	7
0	0.018	0.116	0.52	0.346	8
0	0.001	0.034	0.072	0.893	6
0	0.001	0.031	0.354	0.614	7
0	0.044	0.113	0.381	0.462	8
0	0	0	0.143	0.857	6	mansory	Piao, master	2013
0	0	0.01	0.32	0.671	7
0	0	0.516	0.241	0.242	8
0.111	0.244	0.489	0.111	0.045	9
0.6	0.4	0	0	0	10
0	0.01	0.03	0.18	0.78	6
0.01	0.05	0.15	0.33	0.46	7
0.06	0.21	0.35	0.28	0.1	8
0.17	0.52	0.2	0.08	0.03	9
0.52	0.38	0.09	0.01	0	10
0	0.02	0.08	0.18	0.72	6
0.04	0.09	0.21	0.27	0.39	7
0.1	0.28	0.33	0.22	0.07	8
0.22	0.54	0.14	0.09	0.01	9
0.56	0.39	0.05	0	0	10
0	0	0.005	0.125	0.87	6	high fortification
0	0.005	0.09	0.225	0.68	7
0.01	0.06	0.25	0.38	0.3	8
0.05	0.33	0.28	0.22	0.12	9
0.27	0.55	0.12	0.04	0.02	10
0	0	0.01	0.14	0.85	6	low fortification
0	0.01	0.13	0.36	0.5	7
0.02	0.09	0.3	0.37	0.22	8
0.13	0.42	0.24	0.13	0.08	9
0.35	0.5	0.11	0.03	0.01	10
0	0	0.005	0.125	0.87	6	VIII, IX high fortification	Sun et al.	2014
0	0.005	0.09	0.225	0.68	7
0.01	0.06	0.25	0.38	0.3	8
0.05	0.33	0.28	0.22	0.12	9
0.27	0.55	0.12	0.04	0.02	10
0	0	0.01	0.14	0.85	6	VI, VII middle fortification
0	0.01	0.13	0.36	0.5	7
0.02	0.09	0.3	0.37	0.22	8
0.13	0.42	0.24	0.13	0.08	9
0.35	0.5	0.11	0.03	0.01	10
0	0	0.01	0.22	0.77	6	No fortification
0	0.04	0.16	0.29	0.51	7
0.06	0.2	0.36	0.25	0.13	8
0.15	0.52	0.2	0.09	0.04	9
0.51	0.4	0.09	0	0	10
0.01	0.03	0.15	0.32	0.49	6	old dwelling houses	Chen et al.	1999	analytical using Yin(1995)
0.05	0.1	0.22	0.35	0.28	7
0.18	0.3	0.23	0.17	0.12	8
0.64	0.17	0.12	0.05	0.02	9
0	0.0031	0.0437	0.0884	0.8648	6		Ma & Chang	1999	analytical using Yin(1995)
0.019	0.1192	0.3283	0.349	0.1845	7
0.0928	0.3517	0.3829	0.1256	0.0416	8
0.3118	0.4786	0.1951	0.0145	0	9
0	0	0.03	0.17	0.8	6		He & Kang	1999	analytical using Yin(1995)
0	0.01	0.56	0.33	0.1	7
0.04	0.47	0.46	0.03	0	8
0.48	0.48	0.04	0	0	9
0.93	0.07	0	0	0	10
0	0‭	0.15‭	0.28‭	0.57	6	VI fortification	Zhang and Xie	2004	for common building types in the city
0	‬0.15‭	‬0.28‭	‬0.37‭	0.2	7
‬0.15‭	‬0.28‭	‬0.37‭	‬0.15‭	0.05	8
‬0.28‭	‬0.37‭	‬0.30‭	‬0.05‭	0	9
‬0.37	‬0.30	‬0.33	‬0	0	10
0	0‭	0‭	0.15‭	0.85	6	VII fortification
0	‬0‭	‬0. 15‭	‬0.28‭	0.57	7
0‭	‬0.15	‬0.28‭	‬0.37‭	0.2	8
0. 15‭	0.28‭	‬0.37‭	‬0.15‭	0.05	9
0.28	‬0.37	‬0.30	‬0.05	0	10
0	0	0	0‭	1.0‭	6	VIII fortification
0	0	0‭	‬0. 15‭	‬0.85‭	7
0	0‭	0.15‭	‬0.28‭	‬0.57‭	8
0‭	0. 15‭	‬0.28‭	‬0.37‭	‬0.20‭	9
0. 15	0.28	‬0.37	‬0. 15	‬0.05	10
0	0	0	0‭	1.0‭	6	IX fortification
0	0	0	0‭	‬1.0‭	7
0	0	0‭	0. 15	‬0.85‭	8
0	0‭	0. 15‭	0. 28‭	‬0.57‭	9
0	0. 15	‬0.28	0. 37	‬0.20	10
0	0.0017	0.0336	0.2146	0.7496	6		Zhou et al.	2007
0.0016	0.0523	0.1413	0.3017	0.503	7
0.0085	0.1176	0.3835	0.3292	0.1945	8
0.11	0.381	0.145	0.1805	0.183	9
0	0	0.01	0.073	0.917	6	X fortification	Bie et al.	2010
0	0.004	0.073	0.385	0.538	7
0.003	0.21	0.163	0.296	0.328	8
0.051	0.302	0.228	0.208	0.211	9
0.365	0.357	0.18	0.066	0.032	10
0	0.002	0.014	0.114	0.87	6
0.006	0.109	0.115	0.369	0.401	7
0.144	0.219	0.169	0.273	0.195	8
0.372	0.18	0.24	0.16	0.048	9
0.527	0.244	0.132	0.071	0.026	10
0	0.005	0.015	0.118	0.862	6	IX fortification
0.005	0.049	0.108	0.335	0.503	7
0.018	0.245	0.213	0.251	0.273	8
0.086	0.352	0.218	0.173	0.171	9
0.425	0.352	0.14	0.056	0.027	10
0	0.007	0.024	0.154	0.815	6
0.031	0.129	0.175	0.309	0.356	7
0.154	0.258	0.215	0.218	0.155	8
0.392	0.235	0.21	0.125	0.038	9
0.577	0.229	0.117	0.056	0.021	10
0	0.01	0.02	0.163	0.807	6	VIII fortification
0.01	0.094	0.143	0.285	0.468	7
0.033	0.28	0.263	0.206	0.218	8
0.121	0.402	0.208	0.138	0.131	9
0.485	0.347	0.1	0.046	0.022	10
0	0.012	0.034	0.194	0.76	6
0.056	0.149	0.235	0.249	0.311	7
0.164	0.299	0.259	0.163	0.115	8
0.412	0.29	0.18	0.09	0.028	9
0.627	0.214	0.102	0.041	0.016	10
0	0.015	0.025	0.208	0.752	6	VII fortification
0.015	0.139	0.178	0.235	0.433	7
0.048	0.315	0.313	0.161	0.163	8
0.156	0.452	0.198	0.103	0.091	9
0.545	0.342	0.06	0.036	0.017	10
0	0.017	0.044	0.234	0.705	6
0.081	0.169	0.295	0.189	0.266	7
0.174	0.339	0.304	0.108	0.075	8
0.432	0.345	0.15	0.055	0.018	9
0.677	0.199	0.087	0.026	0.011	10
0	0.02	0.03	0.253	0.697	6	VI fortification
0.02	0.184	0.213	0.185	0.398	7
0.063	0.35	0.363	0.116	0.108	8
0.191	0.502	0.188	0.068	0.051	9
0.605	0.337	0.02	0.026	0.012	10
0	0.022	0.054	0.274	0.65	6
0.106	0.189	0.355	0.129	0.221	7
0.184	0.379	0.349	0.053	0.035	8
0.452	0.4	0.12	0.02	0.008	9
0.727	0.184	0.072	0.011	0.006	10
0.0014	0.0133	0.0577	0.2756	0.652	6	VI fortification	Xia, master	2009	analytical using Yin (1995)
0.0082	0.036	0.0977	0.2527	0.6055	7
0.0291	0.0875	0.184	0.2645	0.4349	8
0.0915	0.1794	0.2633	0.2415	0.2245	9
0.2731	0.3164	0.2488	0.116	0.0457	10
0.001	0.0166	0.0652	0.2836	0.6321	6
0.0112	0.0449	0.1122	0.262	0.5697	7
0.0379	0.105	0.2006	0.2648	0.3917	8
0.1121	0.2036	0.2666	0.2284	0.1893	9
0.3133	0.3251	0.2289	0.0976	0.035	10
0.0027	0.021	0.0761	0.2923	0.6079	6
0.0155	0.0569	0.1301	0.2711	0.5264	7
0.0501	0.1274	0.2189	0.2621	0.3416	8
0.1391	0.2322	0.2667	0.2107	0.1512	9
0.363	0.3315	0.2038	0.0773	0.0243	10
0.0009	0.0088	0.0409	0.24	0.7093	6	VII fortification
0.0054	0.0232	0.0662	0.206	0.6992	7
0.0186	0.0565	0.1304	0.2256	0.5689	8
0.0588	0.1202	0.2114	0.2347	0.3747	9
0.1846	0.2477	0.2602	0.1762	0.1313	10
0.0012	0.0106	0.0462	0.2491	0.6929	6
0.0069	0.028	0.0756	0.2171	0.6724	7
0.0232	0.0667	0.144	0.2333	0.5328	8
0.0704	0.1367	0.2222	0.2341	0.3365	9
0.211	0.2627	0.2553	0.1614	0.1096	10
0.0017	0.0136	0.0542	0.2608	0.6697	6
0.0096	0.036	0.0897	0.2311	0.6337	7
0.031	0.0825	0.1627	0.2412	0.4825	8
0.089	0.1608	0.2339	0.2297	0.2867	9
0.2506	0.2805	0.2443	0.1404	0.0842	10
0.0007	0.0057	0.0265	0.1862	0.781	6	VIII fortification
0.0037	0.0145	0.0409	0.1467	0.7942	7
0.0121	0.0342	0.0812	0.1629	0.7096	8
0.0362	0.0726	0.1422	0.1847	0.5643	9
0.1133	0.1634	0.2142	0.1994	0.6097	10
0.0008	0.0067	0.0298	0.1954	0.7673	6
0.0046	0.0172	0.0464	0.1564	0.7754	7
0.0146	0.0398	0.09	0.1721	0.6835	8
0.0426	0.0822	0.1524	0.191	0.5318	9
0.1289	0.1764	0.2195	0.1952	0.28	10
0.0012	0.0087	0.0356	0.2098	0.7448	6
0.0064	0.0223	0.0562	0.1717	0.7434	7
0.0196	0.0501	0.1049	0.1855	0.6399	8
0.0546	0.0992	0.1679	0.1987	0.4796	9
0.1568	0.1966	0.2249	0.1858	0.2359	10
0.0002	0.0018	0.0119	0.1275	0.8587	6	IX fortification
0.0009	0.0045	0.0166	0.0895	0.8889	7
0.0033	0.0117	0.0374	0.1025	0.8452	8
0.0116	0.029	0.0799	0.1301	0.7494	9
0.0449	0.0881	0.158	0.1942	0.5149	10
0.0002	0.0021	0.0134	0.1358	0.8485	6
0.0011	0.0053	0.019	0.0966	0.8781	7
0.0039	0.0137	0.0421	0.1109	0.8294	8
0.0137	0.0332	0.088	0.1391	0.726	9
0.0514	0.0975	0.1681	0.199	0.484	10
0.0002	0.0027	0.0156	0.1466	0.8349	6
0.0014	0.0066	0.0227	0.1068	0.8625	7
0.005	0.0169	0.0492	0.1221	0.8068	8
0.0171	0.0399	0.0991	0.1502	0.6937	9
0.0618	0.1107	0.1801	0.2025	0.445	10
0	0	0.043	0.163	0.794	6		Cui & Zhai	2015	Yin (1995)
0	0.026	0.147	0.428	0.399	7
0.009	0.107	0.389	0.349	0.146	8
0	0	0.057	0.274	0.669	6	VII fortification, built before 1978	Zhang & Sun	2010	self-developed method for mass building damage prediction by Zhang & Sun (2010)
0	0.047	0.197	0.615	0.141	7
0.039	0.198	0.615	0.109	0.039	8
0.212	0.638	0.113	0.037	0	9
0.772	0.192	0.036	0	0	10
0	0	0.022	0	0.978	6	VII fortification, 1-storey
0	0.022	0	0.323	0.655	7
0.022	0	0.323	0.519	0.136	8
0.022	0.323	0.519	0.136	0	9
0.022	0.842	0.136	0	0	10
0	0	0.019	0.223	0.757	6	VII fortification, usage for living
0	0.014	0.139	0.679	0.168	7
0.013	0.118	0.683	0.159	0.028	8
0.128	0.662	0.185	0.025	0	9
0.692	0.265	0.042	0	0	10
0	0	0.019	0.193	0.788	6	simulated damage ratio in part of Xiamen
0	0.012	0.122	0.656	0.21	7
0.012	0.099	0.667	0.176	0.046	8
0.108	0.639	0.208	0.045	0	9
0.653	0.271	0.076	0	0	10
0	0	0	0.113	0.887	6	actual damage ratio in part of Xiamen
0	0	0.039	0.706	0.256	7
0	0.026	0.689	0.242	0.043	8
0.026	0.73	0.198	0.039	0.007	9
0.681	0.292	0.027	0	0	10
0	0	0	0	1	6	low-storey used as living, built in 1979-1989	Hu & Sun	2010	use the method in Zhang & Sun (2010)
0	0	0	0.206	0.794	7
0	0	0.206	0.476	0.318	8
0	0.206	0.476	0.312	0.006	9
0.227	0.514	0.253	0.006	0	10
0	0	0	0.013	0.987	6	low-storey used as non-living, built in 1979-1989
0	0	0.012	0.159	0.829	7
0	0.023	0.182	0.668	0.127	8
0.023	0.26	0.605	0.112	0	9
0.38	0.524	0.096	0	0	10
0	0	0	0.003	0.997	6	mid-storey used as living, built in 1990-2000
0	0	0.003	0.017	0.98	7
0	0.005	0.032	0.462	0.501	8
0.005	0.058	0.421	0.507	0.009	9
0.118	0.692	0.18	0.01	0	10
0	0	0.003	0.001	0.996	6	mid-storey used as non-living, built in 1990-2000
0	0	0.003	0.134	0.863	7
0	0.007	0.179	0.649	0.165	8
0.001	0.233	0.58	0.183	0.003	9
0.302	0.613	0.082	0.003	0	10
0	0	0	0	1	6	mid-storey used as living, built after 2001
0	0	0	0.061	0.939	7
0	0	0	0.66	0.34	8
0	0	0.418	0.515	0.067	9
0	0.433	0.5	0.067	0	10
0	0	0	0	1	6	mid-storey used as non-living, built after 2001
0	0	0	0.35	0.65	7
0	0	0.184	0.581	0.235	8
0	0.184	0.561	0.255	0	9
0.107	0.426	0.467	0	0	10
0.0009	0.0088	0.0409	0.24	0.7093	6	VII fortification	Yin	1996
0.0054	0.0232	0.0662	0.206	0.6992	7
0.0186	0.0565	0.1304	0.2256	0.5689	8
0.0588	0.1202	0.2116	0.2347	0.3747	9
0.1846	0.2477	0.2602	0.1762	0.1313	10
0.0012	0.0106	0.0462	0.2491	0.6929	6
0.0069	0.028	0.0756	0.2171	0.6724	7
0.0232	0.0667	0.144	0.2333	0.5328	8
0.0704	0.1367	0.2222	0.2341	0.3365	9
0.211	0.2627	0.2553	0.1614	0.1096	10
0.0017	0.0136	0.0542	0.2608	0.6697	6
0.0096	0.036	0.0897	0.2311	0.6337	7
0.031	0.0825	0.1627	0.2412	0.4825	8
0.089	0.1608	0.2339	0.2297	0.2867	9
0.2506	0.2805	0.2443	0.1404	0.0842	10
0.0008	0.0067	0.0298	0.1954	0.7673	6	VIII fortification
0.0046	0.0172	0.0464	0.1564	0.7754	7
0.0146	0.0398	0.09	0.1721	0.6835	8
0.0426	0.0822	0.1524	0.191	0.5318	9
0.1289	0.1764	0.2195	0.1952	0.28	10

## Sheet: analytical_masonry
collapse	serious damage	medium damage	slight damage	no damage	UNIT: g
0.002	0.041	0.18	0.46		0.1	<0.05g fortification	PGA	Fang, book	2011	unknown method
0.038	0.173	0.46	0.77		0.2
0.1	0.33	0.65	0.89		0.3
0.18	0.47	0.78	0.94		0.4
0.26	0.57	0.85	0.97		0.5
0.33	0.66	0.89	0.98		0.6
0.4	0.72	0.92	0.99		0.7
0.48	0.78	0.95	0.99		0.8
0.52	0.81	0.96	1		0.9
0.57	0.85	0.97	1		1
0.004	0.02	0.1	0.33		0.1	=0.05g fortification	PGA
0.02	0.104	0.33	0.64		0.2
0.06	0.22	0.52	0.8		0.3
0.11	0.33	0.64	0.88		0.4
0.17	0.43	0.74	0.93		0.5
0.22	0.52	0.8	0.95		0.6
0.28	0.59	0.85	0.96		0.7
0.33	0.65	0.89	0.98		0.8
0.39	0.7	0.91	0.98		0.9
0.43	0.75	0.93	0.99		1
0.001	0.01	0.06	0.24		0.1	=0.1g fortification	PGA
0.005	0.06	0.24	0.55		0.2
0.04	0.14	0.41	0.73		0.3
0.07	0.24	0.55	0.83		0.4
0.1	0.33	0.65	0.89		0.5
0.15	0.41	0.73	0.92		0.6
0.2	0.48	0.79	0.95		0.7
0.24	0.55	0.83	0.96		0.8
0.31	0.6	0.87	0.97		0.9
0.33	0.65	0.89	0.98		1
0.01	0.02	0.065	0.18		0.1	=0.15g fortification	PGA
0.02	0.05	0.18	0.47		0.2
0.03	0.11	0.34	0.66		0.3
0.05	0.19	0.48	0.78		0.4
0.08	0.26	0.57	0.85		0.5
0.11	0.34	0.66	0.89		0.6
0.14	0.41	0.72	0.92		0.7
0.18	0.47	0.78	0.94		0.8
0.2	0.52	0.81	0.95		0.9
0.25	0.57	0.85	0.96		1
0.001	0.01	0.03	0.12		0.1	=0.2g fortification	PGA
0.01	0.03	0.13	0.36		0.2
0.02	0.07	0.25	0.55		0.3
0.03	0.13	0.36	0.68		0.4
0.05	0.19	0.47	0.77		0.5
0.08	0.25	0.56	0.83		0.6
0.1	0.31	0.63	0.87		0.7
0.13	0.37	0.69	0.91		0.8
0.16	0.42	0.74	0.93		0.9
0.19	0.47	0.78	0.95		1
0.001	0.01	0.02	0.1		0.1	=0.3g fortification	PGA
0.01	0.02	0.09	0.31		0.2
0.01	0.05	0.2	0.49		0.3
0.02	0.1	0.31	0.63		0.4
0.04	0.14	0.41	0.72		0.5
0.05	0.21	0.49	0.79		0.6
0.08	0.25	0.57	0.84		0.7
0.1	0.31	0.63	0.88		0.8
0.12	0.36	0.68	0.91		0.9
0.15	0.42	0.73	0.92		1
0.001	0.01	0.02	0.07		0.1	≥0.4g fortification	PGA
0.01	0.02	0.07	0.24		0.2
0.01	0.04	0.15	0.42		0.3
0.01	0.07	0.24	0.55		0.4
0.02	0.11	0.33	0.66		0.5
0.04	0.15	0.41	0.73		0.6
0.05	0.19	0.49	0.78		0.7
0.07	0.24	0.55	0.83		0.8
0.09	0.29	0.61	0.87		0.9
0.1	0.33	0.66	0.89		1
0.00671141	0.0100671	0.0100671	0.0100671		0.05	0.1g fortification	PGA	Gan, master	2009	R-miu-T relationship is considered
0.00671141	0.00671141	0.0234899	0.201342		0.1
0.00671141	0.0302013	0.137584	0.432886		0.15
0.0167785	0.0939597	0.265101	0.64094		0.2
0.0436242	0.184564	0.416107	0.775168		0.25
0.0771812	0.288591	0.540268	0.855705		0.3
0.124161	0.385906	0.654362	0.916107		0.35
0.191275	0.483221	0.741611	0.949664		0.4
0.251678	0.567114	0.802013	0.969799		0.45
0.312081	0.64094	0.845638	0.97651		0.5
0.379195	0.694631	0.88255	0.989933		0.55
0.436242	0.751678	0.912752	0.996644		0.6
0.493289	0.795302	0.92953	0.996644		0.65
0.543624	0.828859	0.942953	0.996644		0.7
0.597315	0.862416	0.963087	0.996644		0.75
0.634228	0.885906	0.966443	0.996644		0.8
0.681208	0.902685	0.973154	0.996644		0.85
0.708054	0.922819	0.973154	0.996644		0.9
0.744966	0.932886	0.979866	0.996644		0.95
0.775168	0.939597	0.989933	0.996644		1
0.802013	0.95302	0.993289	0.996644		1.05
0.825503	0.963087	0.993289	0.996644		1.1
0.838926	0.963087	0.996644	0.996644		1.15
0.855705	0.963087	0.996644	0.996644		1.2
0	0	0	0		0.05	0.15g fortification
0.00350877	0	0	0.0385965		0.1
0	0	0.0140351	0.168421		0.15
0	0.0140351	0.0807018	0.336842		0.2
0	0.0421053	0.168421	0.498246		0.25
0.00701754	0.0877193	0.259649	0.638596		0.3
0.0210526	0.147368	0.357895	0.729825		0.35
0.0491228	0.210526	0.45614	0.807018		0.4
0.0666667	0.280702	0.54386	0.863158		0.45
0.101754	0.34386	0.617544	0.901754		0.5
0.136842	0.414035	0.687719	0.929825		0.55
0.178947	0.473684	0.736842	0.947368		0.6
0.217544	0.533333	0.789474	0.964912		0.65
0.263158	0.582456	0.824561	0.975439		0.7
0.305263	0.635088	0.85614	0.982456		0.75
0.347368	0.673684	0.877193	0.989474		0.8
0.385965	0.712281	0.894737	0.989474		0.85
0.435088	0.750877	0.919298	0.992982		0.9
0.463158	0.782456	0.933333	0.996491		0.95
0.512281	0.807018	0.940351	0.996491		1
0.540351	0.838596	0.950877	0.996491		1.05
0.568421	0.852632	0.954386	0.996491		1.1
0.607018	0.870175	0.954386	0.996491		1.15
0.631579	0.891228	0.954386	0.996491		1.2
0.00576369	0.00576369	0.00576369	0.00576369		0.05	0.2g fortification
0.00576369	0.00864553	0.00576369	0.00864553		0.1
0.00864553	0.00576369	0.00864553	0.0778098		0.15
0.00576369	0.00864553	0.0317003	0.184438		0.2
0.00864553	0.0172911	0.0720461	0.302594		0.25
0.00576369	0.037464	0.135447	0.435159		0.3
0.0144092	0.0605187	0.198847	0.541787		0.35
0.0115274	0.0951009	0.268012	0.62536		0.4
0.0345821	0.14121	0.345821	0.711816		0.45
0.0403458	0.193084	0.417867	0.769452		0.5
0.0576369	0.239193	0.487032	0.824207		0.55
0.0778098	0.282421	0.544669	0.855908		0.6
0.100865	0.337176	0.605187	0.884726		0.65
0.121037	0.383285	0.651297	0.907781		0.7
0.15562	0.435159	0.70317	0.933718		0.75
0.184438	0.478386	0.737752	0.945245		0.8
0.216138	0.524496	0.766571	0.956772		0.85
0.244957	0.56196	0.795389	0.9683		0.9
0.279539	0.602305	0.829971	0.976945		0.95
0.311239	0.636888	0.847262	0.979827		1
0.351585	0.674352	0.870317	0.985591		1.05
0.37464	0.694524	0.896254	0.988473		1.1
0.400576	0.73487	0.916427	0.988473		1.15
0.446686	0.755043	0.930836	0.997118		1.2
0.00852273	0.00568182	0.00568182	0.00284091		0.05	0.3g fortification
0.00852273	0.00852273	0.00852273	0.00568182		0.1
0.00568182	0.00852273	0.00852273	0.0113636		0.15
0.00852273	0.00852273	0.0113636	0.0539773		0.2
0.00852273	0.00852273	0.0142045	0.113636		0.25
0.00568182	0.00852273	0.03125	0.190341		0.3
0.00568182	0.0113636	0.0511364	0.269886		0.35
0.00852273	0.0198864	0.0852273	0.346591		0.4
0.00568182	0.03125	0.127841	0.431818		0.45
0.0142045	0.0539773	0.176136	0.5		0.5
0.0142045	0.0738636	0.224432	0.571023		0.55
0.0170455	0.0994318	0.267045	0.633523		0.6
0.0198864	0.119318	0.315341	0.684659		0.65
0.0284091	0.150568	0.372159	0.732955		0.7
0.0369318	0.1875	0.417614	0.778409		0.75
0.0568182	0.221591	0.463068	0.809659		0.8
0.0625	0.252841	0.514205	0.840909		0.85
0.0852273	0.289773	0.553977	0.860795		0.9
0.0965909	0.321023	0.59375	0.877841		0.95
0.113636	0.355114	0.619318	0.900568		1
0.133523	0.386364	0.65625	0.914773		1.05
0.150568	0.420455	0.701705	0.931818		1.1
0.170455	0.457386	0.724432	0.940341		1.15
0.193182	0.477273	0.747159	0.948864		1.2
0.00566572	0.00849858	0.00849858	0.00849858		0.05	0.4g fortification
0.0113314	0.00849858	0.0113314	0.0113314		0.1
0.0113314	0.00849858	0.0113314	0.0113314		0.15
0.0113314	0.00849858	0.0169972	0.0141643		0.2
0.0113314	0.00849858	0.0169972	0.0453258		0.25
0.0113314	0.00849858	0.0169972	0.0934844		0.3
0.0141643	0.0113314	0.0169972	0.133144		0.35
0.0141643	0.0169972	0.0339943	0.189802		0.4
0.0141643	0.01983	0.0481586	0.246459		0.45
0.0169972	0.0226629	0.0679887	0.311615		0.5
0.0141643	0.0311615	0.0991501	0.371105		0.55
0.0141643	0.0396601	0.135977	0.433428		0.6
0.0141643	0.0538244	0.167139	0.495751		0.65
0.0169972	0.0764873	0.206799	0.538244		0.7
0.01983	0.082153	0.243626	0.589235		0.75
0.0226629	0.0991501	0.27762	0.637394		0.8
0.0226629	0.130312	0.31728	0.668555		0.85
0.0311615	0.13881	0.348442	0.708215		0.9
0.0368272	0.167139	0.388102	0.739377		0.95
0.0424929	0.192635	0.424929	0.767705		1
0.0566572	0.212465	0.461756	0.804533		1.05
0.0651558	0.246459	0.504249	0.82153		1.1
0.0736544	0.25779	0.529745	0.838527		1.15
0.0849858	0.283286	0.555241	0.852691		1.2

## Sheet: RC
collapse	serious damage	medium damage	slight damage	no damage
0	0.1863	0.2516	0.3168	0.2453	8		Zhou et al.	2011
0	0.0009	0.0089	0.1583	0.8319	6		Ming et al.	2017
0	0.0169	0.0849	0.3186	0.5796	7
0.0169	0.0889	0.1538	0.3408	0.3996	8
0.1926	0.1045	0.1916	0.2801	0.2312	9
0	0.001	0.0092	0.1601	0.8317	6		He et al.	2016
0	0.0213	0.0975	0.3304	0.5775	7
0.0146	0.0902	0.1546	0.3708	0.3847	8
0.023	0.2022	0.5278	0.2382	0.0088	9
0.5778	0.1936	0.1429	0.0857	0	10
0	0.009	0.024	0.195	0.77	6		Qiu & Gao	2015
0	0.038	0.194	0.292	0.476	7
0.022	0.182	0.352	0.26	0.184	8
0.107	0.493	0.119	0.119	0.162	9
0.421	0.458	0.067	0.028	0.026	10
0	0	0	0	1	6		Li et al.	2013
0	0	0	0	1	7
0	0	0.0332	0.2026	0.7642	8
0.054	0.213	0.4736	0.2504	0.009	9
0	0	0	0.03	0.97	6		Wei et al.	2008
0	0	0.01	0.06	0.93	7
0	0.01	0.09	0.43	0.47	8
0.02	0.14	0.39	0.42	0.03	9
0.23	0.55	0.19	0.03	0	10
0	0.03	0.06	0.38	0.52	8		Shi et al.	2007
0	0	0	0.18	0.82	6
0.09	0.26	0.25	0.27	0.13	8
0	0	0.14	0.71	0.15	7
0	0	0	0.13	0.87	6
0	0	0	0.12	0.88	6		Wang, master	2007
0	0	0.02	0.23	0.75	7
0.002	0.015	0.103	0.33	0.55	8
0.015	0.075	0.255	0.305	0.35	9
0.075	0.165	0.405	0.203	0.15	10
13.06	14.84	22.86	21.01	28.23	10		Yuan	2008
3.8	19.35	24.7	20.78	31.37	9
0.3	1.75	5.99	9.64	82.32	8
0	0.3	2.13	5.27	92.3	7
0	0	0	0.15	0.85	6	VI fortification	He & Fu	2009
0	0	0.05	0.35	0.6	7
0.005	0.025	0.21	0.36	0.4	8
0.025	0.125	0.28	0.37	0.2	9
0.095	0.255	0.395	0.155	0.1	10
0	0	0	0.12	0.88	6	VII fortification
0	0	0.02	0.23	0.75	7
0.002	0.015	0.103	0.33	0.55	8
0.015	0.075	0.255	0.305	0.35	9
0.075	0.165	0.405	0.205	0.15	10
0	0	0	0.1	0.9	6	VIII fortification
0	0	0.01	0.14	0.85	7
0	0	0.05	0.25	0.7	8
0.005	0.035	0.145	0.315	0.5	9
0.045	0.105	0.35	0.3	0.2	10
0	0.001	0.0092	0.1601	0.8317	6		Yang et al.	2017
0	0.0213	0.0975	0.3304	0.5775	7
0.0146	0.0902	0.1546	0.3708	0.3847	8
0.023	0.2022	0.5278	0.2382	0.0088	9
0.5778	0.1936	0.1429	0.0857	0	10
0	0	0.0136	0.1251	0.8662	6
0	0	0.0061	0.2014	0.7935	7
0.0419	0.0828	0.131	0.3318	0.4126	8
0	0.031746	0.174603	0.396825	0.396825	6	VII fortification
0	0.0411	0.0984	0.3166	0.6006	7
0.0625	0.1875	0.1875	0.3125	0.25	8
0	0	0.021	0.1433	0.8507	6	VIII fortification
0	0	0.0694	0.3548	0.5873	7
0	0.05	0.26	0.43	0.26	8
0	0	0	0.055	0.945	6		Wen et al.	2017
0	0	0	0.112	0.888	7
0	0	0	0.316	0.684	8
0	0	0	0.05	0.95	6	high fortification	Piao, master	2013
0	0	0.02	0.13	0.85	7
0	0.01	0.06	0.43	0.5	8
0.04	0.18	0.31	0.28	0.19	9
0.2	0.45	0.26	0.07	0.02	10
0	0	0.005	0.06	0.935	6	low fortification
0	0	0.04	0.15	0.81	7
0	0.02	0.08	0.46	0.44	8
0.07	0.23	0.28	0.27	0.15	9
0.25	0.55	0.14	0.05	0.01	10
0	0	0	0	1	6	high-story buildings, VIII,IX high fortification	Sun et al.	2014
0	0	0	0.05	0.95	7
0	0	0.03	0.42	0.55	8
0	0.02	0.31	0.52	0.15	9
0.05	0.22	0.4	0.28	0.05	10
0	0	0	0.05	0.95	6	VIII, IX high fortification
0	0	0.02	0.13	0.85	7
0	0.01	0.06	0.43	0.5	8
0.02	0.14	0.25	0.34	0.25	9
0.2	0.45	0.26	0.07	0.02	10
0	0	0	0	1	6	high-story buildings, VI,VII middle fortification
0	0	0	0.05	0.95	7
0	0	0.05	0.44	0.51	8
0	0.04	0.37	0.47	0.12	9
0.08	0.25	0.43	0.22	0.02	10
0	0	0.005	0.06	0.935	6	VI, VII middle fortification
0	0	0.04	0.15	0.81	7
0	0.02	0.08	0.46	0.44	8
0.04	0.2	0.25	0.36	0.15	9
0.25	0.55	0.14	0.05	0.01	10
0	0	0	0.12	0.88	6	analytical using Yin(1995)	Chen et al.	1999
0	0	0.02	0.23	0.75	7
0	0.02	0.1	0.33	0.55	8
0.02	0.07	0.26	0.3	0.35	9
0	0	0.0132	0.1868	0.8004	6		Zhou et al.	2007
0	0.0158	0.0765	0.3007	0.607	7
0	0.0188	0.0973	0.7717	0.1121	8
0	0.12	0.33	0.34	0.21	9
0	0	0	0.15	0.85	6	VI fortification	Xia, master	2009	analytical using Yin (1995)
0	0	0.05	0.35	0.6	7
0.005	0.025	0.21	0.36	0.4	8
0.025	0.125	0.28	0.37	0.2	9
0.095	0.255	0.395	0.155	0.1	10
0	0	0	0.12	0.88	6	VII fortification
0	0	0.02	0.23	0.75	7
0.002	0.015	0.103	0.33	0.55	8
0.015	0.075	0.255	0.305	0.35	9
0.075	0.165	0.405	0.205	0.15	10
0	0	0	0.05	0.95	6	VIII fortification
0	0	0	0.1	0.9	7
0	0	0.05	0.15	0.8	8
0	0.01	0.085	0.355	0.55	9
0.025	0.055	0.27	0.35	0.3	10
0	0	0.001	0.001	0.998	6	simulated damage matrix for Xi'an, Yanliang District	Hu & Sun	2010	analytical using Zhang & Sun (2010)
0	0	0.002	0.164	0.834	7
0	0.004	0.144	0.638	0.214	8
0.002	0.174	0.577	0.243	0.004	9
0.195	0.55	0.25	0.005	0	10
0	0	0	0	1	6	site-surveyed damage matrix in Xi'an, Yanliang District
0	0	0	0.156	0.844	7
0	0	0.141	0.732	0.127	8
0	0.213	0.535	0.252	0	9
0.222	0.521	0.255	0.002	0	10
0	0	0	0.12	0.88	6		Yin	1996
0	0	0.02	0.23	0.75	7
0.002	0.015	0.103	0.33	0.55	8
0.015	0.075	0.255	0.305	0.35	9
0.075	0.165	0.405	0.205	0.15	10

## Sheet: analytical_RC
collapse	serious damage	medium damage	slight damage	no damage	UNIT: g
0	0	0	0		0.025	DHA method, beta d=0.3	PGA	Zeng, PhD	2013
0	0	0.02	0.07		0.05
0	0	0.11	0.31		0.075
0	0	0.25	0.47		0.1
0	0.02	0.33	0.62		0.125
0	0.06	0.52	0.7		0.15
0	0.1	0.6	0.78		0.175
0	0.16	0.65	0.83		0.2
0.009	0.27	0.7	0.88		0.225
0.027	0.33	0.73	0.92		0.25
0.027	0.39	0.78	0.93		0.275
0.054	0.44	0.83	0.94		0.3
0.063	0.51	0.85	0.96		0.325
0.099	0.56	0.88	0.96		0.35
0.135	0.6	0.9	0.96		0.375
0.153	0.65	0.91	0.97		0.4
0.207	0.68	0.92	0.98		0.425
0.243	0.72	0.93	0.99		0.45
0.324	0.77	0.93	0.99		0.475
0.333	0.8	0.95	0.99		0.5
0.369	0.81	0.95	0.99		0.525
0.378	0.83	0.95	0.99		0.55
0.387	0.85	0.96	0.99		0.575
0.414	0.86	0.96	0.99		0.6
0	0	0	0		0.025	DHA method, beta d=0.7	PGA
0	0	0	0.02		0.05
0	0	0.03	0.08		0.075
0	0	0.08	0.18		0.1
0	0	0.15	0.29		0.125
0	0.02	0.26	0.38		0.15
0	0.03	0.29	0.5		0.175
0	0.06	0.38	0.58		0.2
0	0.08	0.48	0.64		0.225
0	0.1	0.57	0.72		0.25
0.01	0.14	0.62	0.72		0.275
0.02	0.18	0.66	0.79		0.3
0.02	0.23	0.72	0.81		0.325
0.03	0.26	0.72	0.84		0.35
0.04	0.29	0.75	0.86		0.375
0.05	0.31	0.79	0.88		0.4
0.06	0.35	0.81	0.91		0.425
0.08	0.38	0.83	0.92		0.45
0.09	0.44	0.85	0.92		0.475
0.1	0.48	0.86	0.92		0.5
0.11	0.52	0.89	0.92		0.525
0.14	0.54	0.9	0.92		0.55
0.16	0.58	0.91	0.93		0.575
0.18	0.6	0.92	0.94		0.6
0	0	0	0	1	0.05		PGA, G10-storey	Liu, PhD	2017
0	0	0	0.0321	0.9679	0.1
0	0.0012	0.0095	0.1262	0.8631	0.15
0	0.006	0.0345	0.219	0.7405	0.2
0.0036	0.0571	0.0679	0.3488	0.5226	0.3
0.0155	0.1036	0.125	0.4143	0.3417	0.4
0.0905	0.2048	0.1702	0.4417	0.0929	0.6
0.1738	0.2679	0.2071	0.3512	0	0.8
0.2667	0.3167	0.2167	0.2	0	1
0.3679	0.3333	0.1952	0.1036	0	1.2
0.4452	0.3607	0.15	0.044	0	1.4
0.5286	0.3464	0.125	0	0	1.6
0	0	0	0	1	0.05	The period of groud motion within the range of (0,0.3)s	PGA, G10-storey
0	0	0	0	1	0.1
0	0	0	0.0106	0.9894	0.15
0	0	0	0.037	0.963	0.2
0	0.0053	0.0053	0.164	0.8254	0.3
0	0.0106	0.0265	0.3122	0.6508	0.4
0.0053	0.0741	0.0847	0.6243	0.2116	0.6
0.0212	0.1323	0.1746	0.672	0	0.8
0.0582	0.2063	0.3016	0.4339	0	1
0.1058	0.3069	0.3651	0.2222	0	1.2
0.164	0.4286	0.3069	0.1005	0	1.4
0.2328	0.4603	0.3069	0	0	1.6
0	0	0	0	1	0.05	The period of groud motion within the range of [0.3,0.45)s	PGA, G10-storey
0	0	0	0.0084	0.9916	0.1
0	0	0	0.0378	0.9622	0.15
0	0	0.0126	0.0882	0.8992	0.2
0	0.0126	0.0252	0.2437	0.7185	0.3
0.0042	0.0294	0.0588	0.4286	0.479	0.4
0.021	0.0882	0.1639	0.5966	0.1303	0.6
0.0546	0.2017	0.2605	0.4832	0	0.8
0.1008	0.3067	0.3109	0.2815	0	1
0.1849	0.3866	0.2773	0.1513	0	1.2
0.2563	0.4622	0.2185	0.063	0	1.4
0.3361	0.5084	0.1555	0	0	1.6
0	0	0	0	1	0.05	The period of groud motion within the range of [0.45,0.6)s	PGA, G10-storey
0	0	0	0.0275	0.9725	0.1
0	0	0.0165	0.1209	0.8626	0.15
0	0	0.0385	0.3022	0.6593	0.2
0	0.0604	0.0604	0.478	0.4011	0.3
0.022	0.0.0824	0.1813	0.5165	0.1978	0.4
0.0714	0.3187	0.1978	0.3791	0.033	0.6
0.1813	0.3736	0.2418	0.2033	0	0.8
0.3462	0.4011	0.1758	0.0769	0	1
0.478	0.3736	0.1154	0.033	0	1.2
0.5549	0.3681	0.0604	0.0165	0	1.4
0.6593	0.322	0.0385	0	0	1.6
0	0	0	0	1	0.05	The period of groud motion within the range of [0.6,1.2)s	PGA, G10-storey
0	0	0	0.0866	0.9134	0.1
0	0.0043	0.0216	0.316	0.658	0.15
0	0.0216	0.0823	0.4372	0.4589	0.2
0.013	0.1429	0.1688	0.5065	0.1688	0.3
0.0346	0.2727	0.2294	0.4026	0.0606	0.4
0.2468	0.342	0.2251	0.1818	0.0043	0.6
0.4156	0.3636	0.1515	0.0693	0	0.8
0.5455	0.3506	0.0823	0.0216	0	1
0.684	0.2684	0.0346	0.013	0	1.2
0.7835	0.1948	0.0216	0	0	1.4
0.8658	0.1212	0.013	0	0	1.6
0	0	0	0	1	0.05		PGA, G10-storey, lower than 20-storey
0	0	0	0.0458	0.9542	0.1
0	0.0021	0.0146	0.1229	0.8604	0.15
0	0.0083	0.0292	0.2188	0.7438	0.2
0.0063	0.0521	0.0708	0.3167	0.5542	0.3
0.0167	0.1021	0.125	0.3792	0.3771	0.4
0.0958	0.1917	0.15	0.4625	0.1	0.6
0.1813	0.2333	0.2	0.3854	0	0.8
0.2583	0.2917	0.2354	0.2146	0	1
0.3375	0.3229	0.2271	0.1125	0	1.2
0.4146	0.3813	0.1604	0.0438	0	1.4
0.5063	0.3521	0.1417	0	0	1.6
0	0	0	0	1	0.05		PGA, G20-storey
0	0	0	0.0139	0.9861	0.1
0	0	0.0028	0.1306	0.8667	0.15
0	0.0028	0.0417	0.2194	0.7361	0.2
0	0.0639	0.0639	0.3917	0.4806	0.3
0.0139	0.1056	0.125	0.4611	0.2944	0.4
0.0833	0.2222	0.1972	0.4139	0.0833	0.6
0.1639	0.3139	0.2167	0.3056	0	0.8
0.2778	0.35	0.1917	0.1806	0	1
0.4083	0.3472	0.1528	0.0917	0	1.2
0.4861	0.3333	0.1361	0.0444	0	1.4
0.5583	0.3389	0.1028	0	0	1.6
0.001	0.014	0.06	0.24		0.1	<0.05g fortification	PGA, unknown method	Fang, book	2011
0.014	0.066	0.24	0.55		0.2
0.035	0.152	0.41	0.73		0.3
0.07	0.25	0.55	0.83		0.4
0.11	0.34	0.65	0.89		0.5
0.15	0.42	0.73	0.92		0.6
0.2	0.49	0.79	0.95		0.7
0.25	0.55	0.83	0.97		0.8
0.3	0.61	0.87	0.98		0.9
0.35	0.65	0.89	0.98		1
0.001	0.006	0.03	0.15		0.1	=0.05g fortification
0.009	0.035	0.15	0.41		0.2
0.022	0.089	0.29	0.6		0.3
0.04	0.15	0.41	0.73		0.4
0.06	0.22	0.52	0.81		0.5
0.09	0.29	0.61	0.86		0.6
0.12	0.36	0.68	0.9		0.7
0.16	0.41	0.73	0.92		0.8
0.19	0.47	0.78	0.94		0.9
0.22	0.52	0.82	0.95		1
0.001	0.01	0.03	0.1		0.1	=0.1g fortification
0.01	0.03	0.1	0.32		0.2
0.02	0.05	0.21	0.51		0.3
0.02	0.1	0.32	0.64		0.4
0.04	0.15	0.42	0.73		0.5
0.06	0.21	0.51	0.8		0.6
0.08	0.26	0.58	0.85		0.7
0.09	0.31	0.64	0.88		0.8
0.12	0.37	0.69	0.91		0.9
0.15	0.42	0.73	0.92		1
0.001	0.01	0.02	0.07		0.1	=0.15g fortification
0.01	0.02	0.07	0.26		0.2
0.01	0.04	0.16	0.43		0.3
0.02	0.07	0.26	0.56		0.4
0.03	0.12	0.36	0.67		0.5
0.04	0.17	0.44	0.74		0.6
0.06	0.21	0.51	0.8		0.7
0.08	0.27	0.57	0.84		0.8
0.1	0.31	0.63	0.87		0.9
0.12	0.36	0.67	0.9		1
0.001	0.004	0.015	0.05		0.1	=0.2g fortification
0.001	0.009	0.05	0.21		0.2
0.01	0.03	0.13	0.37		0.3
0.01	0.06	0.22	0.51		0.4
0.02	0.09	0.3	0.61		0.5
0.02	0.13	0.38	0.7		0.6
0.04	0.18	0.45	0.76		0.7
0.06	0.21	0.51	0.81		0.8
0.07	0.26	0.57	0.84		0.9
0.09	0.31	0.62	0.87		1
0.001	0.001	0.01	0.037		0.1	=0.3g fortification
0.002	0.002	0.03	0.17		0.2
0.003	0.02	0.09	0.31		0.3
0.01	0.04	0.17	0.45		0.4
0.01	0.06	0.24	0.55		0.5
0.02	0.1	0.32	0.64		0.6
0.03	0.13	0.39	0.71		0.7
0.04	0.17	0.45	0.76		0.8
0.05	0.21	0.5	0.8		0.9
0.06	0.24	0.56	0.83		1
0.001	0.002	0.004	0.028		0.1	≥0.4g fortification
0.002	0.007	0.03	0.13		0.2
0.005	0.01	0.07	0.27		0.3
0.01	0.03	0.13	0.39		0.4
0.01	0.05	0.2	0.49		0.5
0.02	0.07	0.27	0.58		0.6
0.02	0.1	0.33	0.65		0.7
0.03	0.13	0.39	0.71		0.8
0.04	0.17	0.45	0.75		0.9
0.05	0.2	0.49	0.79		1
0	0.00303951	0.00303951	0.00303951		0.05	DHA method, high fortification RC-core wall	PGA	Liu Juan, master	2014
0.00303951	0.00607903	0.00303951	0.00911854		0.1
0.00607903	0.00607903	0.00607903	0.0607903		0.15
0.00607903	0.00911854	0.0303951	0.176292		0.2
0.00607903	0.00911854	0.0851064	0.337386		0.25
0.00607903	0.0212766	0.173252	0.49848		0.3
0.00607903	0.0455927	0.267477	0.620061		0.35
0.0151976	0.0911854	0.370821	0.729483		0.4
0.0243161	0.136778	0.474164	0.808511		0.45
0.0455927	0.194529	0.56535	0.863222		0.5
0.0699088	0.255319	0.650456	0.902736		0.55
0.100304	0.319149	0.714286	0.933131		0.6
0.136778	0.382979	0.765957	0.954407		0.65
0.173252	0.452888	0.81459	0.966565		0.7
0.215805	0.510638	0.851064	0.978723		0.75
0.255319	0.568389	0.884498	0.984802		0.8
0.303951	0.620061	0.905775	0.990881		0.85
0.349544	0.665653	0.927052	0.993921		0.9
0.00311526	0.00311526	0.00311526	0.00311526		0.05	DHA method, No fortification RC-core wall
0.00311526	0.00623053	0.00934579	0.0778816		0.1
0.00311526	0.0124611	0.0965732	0.34891		0.15
0.00934579	0.0560748	0.280374	0.65109		0.2
0.0311526	0.143302	0.482866	0.819315		0.25
0.0809969	0.277259	0.666667	0.915888		0.3
0.155763	0.423676	0.785047	0.959502		0.35
0.252336	0.548287	0.872274	0.978193		0.4
0.352025	0.663551	0.919003	0.990654		0.45
0.451713	0.750779	0.950156	0.990654		0.5
0.548287	0.825545	0.965732	0.990654		0.55
0.626168	0.872274	0.978193	0.993769		0.6
0.70405	0.909657	0.984424	0.996885		0.65
0.766355	0.934579	0.987539	0.996885		0.7
0.813084	0.953271	0.990654	0.996885		0.75
0.850467	0.965732	0.990654	1		0.8
0.884735	0.981308	0.993769	1		0.85
0.909657	0.984424	0.993769	1		0.9
0.00310559	0.00310559	0.00310559	0.00310559	0.0434783	0.0512821	IDA method, 20-storey RC frame-core wall	PGA	Liu Yang, master	2014
0.00621118	0.00310559	0.00310559	0.425466	0.975155	0.100233
0.00621118	0.00310559	0.052795	0.953416	0.993789	0.151515
0.00621118	0.00310559	0.31677	0.990683	0.990683	0.198135
0.00310559	0.0217391	0.611801	0.990683	0.990683	0.249417
0.00621118	0.0714286	0.829193	0.990683	0.993789	0.300699
0.00621118	0.167702	0.934783	0.990683	0.990683	0.34965
0.00310559	0.301242	0.968944	0.990683	0.990683	0.400932
0.00621118	0.450311	0.984472	0.990683	0.990683	0.449883
0.015528	0.580745	0.987578	0.990683	0.993789	0.498834
0.0310559	0.695652	0.990683	0.990683	0.990683	0.550117
0.0590062	0.779503	0.993789	0.993789	0.993789	0.599068
0.0900621	0.841615	0.990683	0.990683	0.993789	0.65035
0.139752	0.885093	0.990683	0.993789	0.990683	0.701632
0.189441	0.913043	0.993789	0.990683	0.990683	0.750583
0.254658	0.934783	0.993789	0.993789	0.990683	0.799534
0.313665	0.953416	0.993789	0.990683	0.990683	0.848485
0.378882	0.959627	0.990683	0.990683	0.993789	0.899767
0.437888	0.968944	0.990683	0.990683	0.990683	0.948718
0.496894	0.97205	0.993789	0.990683	0.993789	0.997669
0.00280899	0	0	0.140449	0.401685	0.0512821	IDA method, 20-storey RC frame-core wall	SA
0.00280899	0.00280899	0.115169	0.75	0.949438	0.100233
0.00561798	0.0674157	0.410112	0.94382	0.988764	0.151515
0.00280899	0.176966	0.648876	0.980337	0.994382	0.198135
0.00561798	0.297753	0.780899	0.991573	0.991573	0.249417
0.0393258	0.401685	0.856742	0.991573	0.991573	0.300699
0.103933	0.511236	0.912921	0.991573	0.994382	0.34965
0.168539	0.620787	0.946629	0.991573	0.994382	0.400932
0.230337	0.699438	0.963483	0.991573	0.994382	0.449883
0.300562	0.755618	0.974719	0.994382	0.991573	0.498834
0.359551	0.800562	0.980337	0.991573	0.991573	0.550117
0.412921	0.839888	0.985955	0.991573	0.997191	0.599068
0.466292	0.873596	0.985955	0.994382	0.991573	0.65035
0.516854	0.901685	0.988764	0.991573	0.994382	0.701632
0.567416	0.921348	0.991573	0.991573	0.991573	0.750583
0.609551	0.935393	0.991573	0.991573	0.991573	0.799534
0.651685	0.946629	0.994382	0.991573	0.991573	0.848485
0.682584	0.957865	0.994382	0.991573	0.991573	0.899767
0.710674	0.963483	0.994382	0.991573	0.991573	0.948718
0.735955	0.969101	0.994382	0.991573	0.994382	0.997669
0.00881057	0.00881057	0.0132159	0.202643		0.0512821	IDA method, newly built	PGA	Sun, PhD	2016
0.00881057	0.00881057	0.140969	0.647577		0.100233
0.00881057	0.0176211	0.356828	0.859031		0.151515
0.00881057	0.0572687	0.555066	0.942731		0.198135
0.00881057	0.110132	0.700441	0.977974		0.249417
0.00881057	0.189427	0.801762	0.991189		0.300699
0.0176211	0.259912	0.863436	0.995595		0.34965
0.0264317	0.343612	0.911894	0.995595		0.400932
0.0396476	0.414097	0.938326	0.995595		0.449883
0.0572687	0.488987	0.960352	0.995595		0.498834
0.0792952	0.555066	0.969163	0.995595		0.550117
0.101322	0.60793	0.977974	0.995595		0.599068
0.127753	0.656388	0.986784	0.995595		0.65035
0.15859	0.704846	0.986784	0.995595		0.701632
0.185022	0.748899	0.991189	0.995595		0.750583
0.215859	0.779736	0.995595	0.995595		0.799534
0.246696	0.810573	0.995595	0.995595		0.848485
0.281938	0.837004	0.995595	0.995595		0.899767
0.317181	0.859031	0.995595	0.995595		0.948718
0.343612	0.876652	0.995595	0.995595		0.997669
0.00687285	0.00684932	0.0137457	0.19244		0.0512821	IDA method, built 30 years ago
0.00687285	0.00342466	0.171821	0.701031		0.100233
0.00687285	0.0171233	0.402062	0.90378		0.151515
0.0103093	0.0616438	0.642612	0.969072		0.198135
0.00687285	0.136986	0.786942	0.993127		0.249417
0.0137457	0.226027	0.872852	0.993127		0.300699
0.0206186	0.321918	0.927835	0.993127		0.34965
0.0343643	0.417808	0.962199	0.996564		0.400932
0.0515464	0.506849	0.972509	0.996564		0.449883
0.0790378	0.585616	0.982818	0.996564		0.498834
0.103093	0.65411	0.989691	0.996564		0.550117
0.137457	0.712329	0.993127	0.996564		0.599068
0.175258	0.763699	0.993127	0.996564		0.65035
0.213058	0.80137	0.993127	0.996564		0.701632
0.257732	0.839041	0.993127	0.996564		0.750583
0.302405	0.863014	0.996564	1		0.799534
0.340206	0.886986	0.996564	0.996564		0.848485
0.378007	0.910959	0.996564	0.996564		0.899767
0.42268	0.924658	0.996564	0.996564		0.948718
0.460481	0.938356	0.996564	0.996564		0.997669
0.00677966	0.00677966	0.0135593	0.183051		0.0512821	IDA method, built 40 years ago
0.00677966	0.0101695	0.162712	0.698305		0.100233
0.00677966	0.020339	0.433898	0.911864		0.151515
0.00677966	0.0711864	0.661017	0.972881		0.198135
0.0101695	0.149153	0.80678	0.989831		0.249417
0.0169492	0.250847	0.898305	0.99322		0.300699
0.0271186	0.355932	0.942373	0.99322		0.34965
0.0474576	0.461017	0.959322	0.99322		0.400932
0.0711864	0.552542	0.979661	0.99322		0.449883
0.105085	0.633898	0.983051	0.99322		0.498834
0.145763	0.698305	0.989831	0.99322		0.550117
0.186441	0.755932	0.989831	0.99661		0.599068
0.237288	0.80339	0.99322	0.99322		0.65035
0.284746	0.850847	0.99322	0.99322		0.701632
0.332203	0.874576	0.99322	0.99322		0.750583
0.376271	0.901695	0.99322	0.99322		0.799534
0.430508	0.918644	0.99661	0.99322		0.848485
0.471186	0.932203	0.99661	0.99661		0.899767
0.508475	0.945763	0.99661	0.99661		0.948718
0.549153	0.955932	0.99661	0.99322		0.997669
0.00684932	0.00342466	0.00684932	0.167808		0.0512821	IDA method, built 50 years ago
0.00684932	0.00684932	0.150685	0.712329		0.100233
0.00684932	0.0171233	0.44863	0.921233		0.151515
0.00684932	0.0719178	0.674658	0.976027		0.198135
0.010274	0.160959	0.821918	0.986301		0.249417
0.0136986	0.267123	0.900685	0.993151		0.300699
0.0239726	0.386986	0.945205	0.993151		0.34965
0.0376712	0.493151	0.965753	0.993151		0.400932
0.0684932	0.589041	0.979452	0.993151		0.449883
0.10274	0.671233	0.982877	0.993151		0.498834
0.14726	0.732877	0.986301	0.996575		0.550117
0.191781	0.787671	0.986301	0.996575		0.599068
0.236301	0.832192	0.989726	1		0.65035
0.280822	0.863014	0.993151	0.996575		0.701632
0.332192	0.893836	0.989726	1		0.750583
0.390411	0.914384	0.989726	1		0.799534
0.434932	0.931507	0.989726	1		0.848485
0.486301	0.94863	0.993151	0.996575		0.899767
0.527397	0.958904	0.989726	0.996575		0.948718
0.568493	0.965753	0.989726	0.996575		0.997669
0.00283286	0.00566572	0.0708215	0.974504		0.1	capacity spectrum method, 0.05g fortification; 8-storey	SA	Yu et al.	2017
0.00283286	0.0396601	0.345609	0.994334		0.2
0.0113314	0.121813	0.572238	0.994334		0.3
0.0311615	0.232295	0.739377	0.994334		0.4
0.0566572	0.348442	0.838527	0.997167		0.5
0.0934844	0.456091	0.898017	0.997167		0.6
0.141643	0.552408	0.934844	0.997167		0.7
0.184136	0.640227	0.957507	0.997167		0.8
0.229462	0.708215	0.974504	0.997167		0.9
0.27762	0.759207	0.983003	0.997167		1
0.325779	0.804533	0.985836	1		1.1
0.368272	0.835694	0.991501	1		1.2
0.413598	0.869688	0.994334	0.997167		1.3
0.456091	0.889518	0.994334	0.997167		1.4
0.492918	0.906516	0.994334	0.997167		1.5
0.526912	0.926346	0.994334	0.997167		1.6
0.560907	0.94051	0.994334	0.997167		1.7
0.594901	0.949008	0.994334	0.997167		1.8
0.623229	0.954674	0.997167	0.997167		1.9
0.648725	0.957507	0.997167	0.997167		2
0.00330033	0.00330033	0.039604	0.957096		0.1	capacity spectrum method, 0.1g fortification; 8-storey
0.00330033	0.0165017	0.227723	0.993399		0.2
0.00660066	0.0726073	0.458746	0.9967		0.3
0.0132013	0.161716	0.650165	0.993399		0.4
0.0363036	0.257426	0.775578	0.9967		0.5
0.0627063	0.363036	0.848185	0.993399		0.6
0.0924092	0.462046	0.89769	0.993399		0.7
0.125413	0.547855	0.930693	0.9967		0.8
0.168317	0.613861	0.950495	0.993399		0.9
0.20462	0.676568	0.963696	0.993399		1
0.244224	0.726073	0.973597	0.993399		1.1
0.283828	0.768977	0.976898	0.993399		1.2
0.323432	0.80198	0.980198	0.993399		1.3
0.363036	0.834983	0.983498	0.993399		1.4
0.39604	0.858086	0.990099	0.9967		1.5
0.429043	0.881188	0.993399	0.993399		1.6
0.465347	0.89769	0.9967	0.990099		1.7
0.49505	0.917492	0.9967	0.9967		1.8
0.528053	0.924092	0.9967	0.9967		1.9
0.554455	0.937294	0.9967	0.9967		2
0	0.00318471	0.0382166	0.952229		0.125	capacity spectrum method, 0.2g fortification; 8-storey
0.00318471	0.0191083	0.251592	0.990446		0.25
0.00636943	0.0955414	0.528662	0.990446		0.375
0.022293	0.207006	0.729299	0.993631		0.5
0.0477707	0.33758	0.843949	0.990446		0.625
0.089172	0.464968	0.907643	0.990446		0.75
0.136943	0.576433	0.942675	0.996815		0.875
0.187898	0.665605	0.961783	0.993631		1
0.242038	0.735669	0.977707	0.993631		1.125
0.296178	0.792994	0.984076	0.996815		1.25
0.350318	0.83758	0.990446	0.996815		1.375
0.404459	0.869427	0.993631	0.996815		1.5
0.452229	0.894904	0.993631	0.996815		1.625
0.5	0.920382	0.993631	0.996815		1.75
0.544586	0.93949	0.993631	0.993631		1.875
0.582803	0.949045	0.996815	0.993631		2
0.617834	0.958599	0.993631	0.993631		2.125
0.649682	0.964968	0.993631	0.996815		2.25
0.678344	0.964968	0.996815	0.993631		2.375
0.707006	0.971338	0.996815	0.996815		2.5
0.00316456	0.00316456	0.00316456	0.968354		0.125	capacity spectrum method, 0.3g fortification; 8-storey
0.00316456	0.00316456	0.123418	0.996835		0.25
0.00316456	0.0253165	0.439873	0.996835		0.375
0.00632911	0.10443	0.731013	1		0.5
0.0221519	0.25	0.879747	1		0.625
0.0474684	0.420886	0.949367	0.996835		0.75
0.085443	0.572785	0.981013	0.996835		0.875
0.139241	0.699367	0.993671	1		1
0.202532	0.797468	0.996835	1		1.125
0.272152	0.870253	0.996835	0.996835		1.25
0.341772	0.914557	0.996835	0.996835		1.375
0.408228	0.939873	0.993671	0.996835		1.5
0.474684	0.968354	0.996835	0.996835		1.625
0.537975	0.977848	0.996835	0.996835		1.75
0.594937	0.987342	0.996835	0.996835		1.875
0.64557	0.993671	0.996835	0.996835		2
0.689873	0.996835	0.996835	1		2.125
0.734177	0.996835	1	0.996835		2.25
0.762658	1	1	0.996835		2.375
0.794304	1	0.996835	0.996835		2.5
0	0.00323625	0.0841424	0.983819		0.1	capacity spectrum method, 0.05g fortification; 10-storey
0.00323625	0.038835	0.38835	0.990291		0.2
0.00647249	0.12945	0.650485	0.993528		0.3
0.0323625	0.262136	0.805825	0.993528		0.4
0.0582524	0.398058	0.89644	0.993528		0.5
0.0970874	0.517799	0.938511	0.996764		0.6
0.142395	0.614887	0.964401	0.996764		0.7
0.194175	0.702265	0.977346	0.996764		0.8
0.245955	0.763754	0.987055	0.996764		0.9
0.297735	0.815534	0.993528	1		1
0.349515	0.857605	0.996764	0.996764		1.1
0.391586	0.886731	1	0.996764		1.2
0.436893	0.909385	1	1		1.3
0.482201	0.925566	0.996764	1		1.4
0.521036	0.941748	0.993528	0.996764		1.5
0.559871	0.951456	0.996764	0.996764		1.6
0.592233	0.961165	0.996764	0.996764		1.7
0.624595	0.967638	0.996764	0.996764		1.8
0.653722	0.97411	0.996764	0.996764		1.9
0.679612	0.977346	0.996764	0.996764		2
0.00328947	0.00328947	0.0559211	0.983553		0.1	capacity spectrum method, 0.1g fortification; 10-storey
0.00657895	0.0328947	0.351974	0.993421		0.2
0.00986842	0.111842	0.601974	0.993421		0.3
0.0296053	0.230263	0.779605	0.996711		0.4
0.0526316	0.365132	0.875	0.996711		0.5
0.0888158	0.476974	0.924342	0.996711		0.6
0.128289	0.582237	0.960526	0.996711		0.7
0.177632	0.667763	0.973684	0.996711		0.8
0.223684	0.736842	0.980263	0.996711		0.9
0.273026	0.789474	0.990132	0.996711		1
0.322368	0.832237	0.993421	0.996711		1.1
0.365132	0.871711	0.996711	0.996711		1.2
0.414474	0.894737	0.996711	0.996711		1.3
0.457237	0.917763	0.996711	0.996711		1.4
0.496711	0.930921	0.996711	0.993421		1.5
0.536184	0.944079	0.996711	1		1.6
0.569079	0.957237	0.996711	1		1.7
0.601974	0.963816	0.996711	0.996711		1.8
0.631579	0.970395	0.996711	0.996711		1.9
0.654605	0.970395	0.993421	0.993421		2
0.00664452	0.00332226	0.0996678	0.0996678		0.125	capacity spectrum method, 0.2g fortification; 10-storey
0.00664452	0.0498339	0.451827	0.448505		0.25
0.0166113	0.152824	0.697674	0.697674		0.375
0.0398671	0.302326	0.833887	0.840532		0.5
0.0797342	0.448505	0.916944	0.916944		0.625
0.129568	0.574751	0.950166	0.953488		0.75
0.182724	0.671096	0.9701	0.9701		0.875
0.232558	0.747508	0.983389	0.983389		1
0.295681	0.803987	0.986711	0.986711		1.125
0.348837	0.853821	0.993355	0.990033		1.25
0.398671	0.883721	0.993355	0.993355		1.375
0.448505	0.910299	0.996678	0.996678		1.5
0.495017	0.930233	0.996678	0.996678		1.625
0.541528	0.946844	0.996678	0.996678		1.75
0.581395	0.956811	0.996678	0.996678		1.875
0.61794	0.966777	0.996678	0.996678		2
0.651163	0.9701	0.996678	0.996678		2.125
0.681063	0.976744	1	1		2.25
0.710963	0.980066	0.996678	0.996678		2.375
0.730897	0.983389	0.996678	0.996678		2.5
0.00647249	0.00647249	0.00970874	0.983819		0.125	capacity spectrum method, 0.3g fortification; 10-storey
0.00647249	0.00647249	0.229773	0.993528		0.25
0.00647249	0.0647249	0.550162	0.993528		0.375
0.0161812	0.177994	0.750809	0.993528		0.5
0.038835	0.323625	0.880259	0.996764		0.625
0.0711974	0.459547	0.938511	0.996764		0.75
0.116505	0.592233	0.964401	0.996764		0.875
0.171521	0.692557	0.980583	0.996764		1
0.226537	0.770227	0.987055	0.996764		1.125
0.28479	0.828479	0.993528	0.996764		1.25
0.343042	0.873786	0.996764	0.996764		1.375
0.398058	0.906149	1	0.996764		1.5
0.453074	0.928803	0.996764	0.996764		1.625
0.501618	0.94822	0.996764	0.996764		1.75
0.550162	0.957929	0.996764	0.996764		1.875
0.598706	0.967638	1	0.996764		2
0.634304	0.97411	1	0.996764		2.125
0.669903	0.977346	1	0.996764		2.25
0.705502	0.983819	0.996764	0.996764		2.375
0.728155	0.990291	0.996764	0.993528		2.5
0	0	0	0.0526316		0.1	DHA method, 8-storey, unfortificated, X direction	PGA	Zhu, PhD	2010
0.00350877	0	0.333333	0.996491		0.2
0.00350877	0	0.982456	0.992982		0.3
0	0.0140351	0.996491	0.996491		0.4
0	0.294737	0.992982	0.996491		0.5
0.00350877	0.726316	0.996491	0.992982		0.6
0	0.947368	0.992982	1		0.7
0.0140351	0.992982	1	0.996491		0.8
0.101754	0.992982	1	0.996491		0.9
0.291228	0.992982	0.996491	0.996491		1
0.536842	0.996491	1	0.996491		1.1
0.736842	0.996491	1	0.996491		1.2
0.877193	0.996491	0.996491	1		1.3
0.954386	0.996491	0.996491	1		1.4
0.985965	1	1	1		1.5
0.992982	0.992982	0.996491	1		1.6
0.996491	0.996491	0.996491	1		1.7
0.996491	1	0.996491	1		1.8
0.996491	1	1	1		1.9
0.996491	0.996491	1	1		2
0	0	0	0		0.1	DHA method, 8-storey, fortificated, X direction
0	0	0.0385965	0.894737		0.2
0	0	0.785965	0.992982		0.3
0	0	0.996491	0.996491		0.4
0	0.0245614	0.996491	0.992982		0.5
0	0.224561	0.992982	0.992982		0.6
0	0.607018	0.996491	0.992982		0.7
0	0.873684	0.996491	0.996491		0.8
0	0.975439	0.996491	0.996491		0.9
0.0245614	0.992982	1	1		1
0.0982456	0.996491	1	1		1.1
0.235088	0.996491	1	0.996491		1.2
0.421053	0.996491	0.996491	0.996491		1.3
0.624561	0.996491	1	1		1.4
0.775439	0.996491	0.996491	0.996491		1.5
0.880702	0.996491	0.996491	0.996491		1.6
0.947368	0.996491	0.996491	0.996491		1.7
0.978947	0.996491	0.996491	0.996491		1.8
0.989474	0.996491	0.996491	1		1.9
0.996491	0.992982	0.996491	0.996491		2
0.00520833	0.00260417	0.00520833	0.158854		0.1	DHA method, 8-storey, unfortificated, Y direction
0.00520833	0.0078125	0.697917	0.994792		0.2
0.00520833	0.00520833	0.992188	0.994792		0.3
0.0078125	0.148438	0.997396	0.992188		0.4
0.00520833	0.669271	0.994792	0.992188		0.5
0.0078125	0.950521	0.997396	0.994792		0.6
0.0286458	0.994792	0.997396	0.997396		0.7
0.145833	0.997396	1	0.997396		0.8
0.395833	0.994792	0.997396	0.997396		0.9
0.664062	0.994792	0.997396	0.997396		1
0.859375	0.994792	0.997396	0.997396		1.1
0.950521	0.997396	0.994792	0.997396		1.2
0.984375	0.997396	0.997396	0.997396		1.3
0.997396	0.997396	0.997396	0.997396		1.4
0.997396	0.992188	0.994792	0.994792		1.5
0.997396	0.997396	0.994792	0.997396		1.6
0.997396	0.997396	0.997396	0.997396		1.7
0.997396	0.997396	0.997396	0.994792		1.8
0.997396	0.992188	0.994792	0.992188		1.9
0.997396	0.992188	0.997396	0.994792		2
0.00260417	0.00260417	0.00260417	0.00260417		0.1	DHA method, 8-storey, fortificated, Y direction
0.00260417	0.00260417	0.09375	0.966146		0.2
0.00260417	0.00520833	0.914062	0.994792		0.3
0.00520833	0.00520833	0.992188	0.997396		0.4
0.00260417	0.0911458	0.992188	0.994792		0.5
0.00260417	0.453125	0.992188	0.997396		0.6
0.00520833	0.799479	0.997396	0.997396		0.7
0.0078125	0.960938	0.997396	0.994792		0.8
0.0234375	0.989583	0.994792	0.997396		0.9
0.0859375	0.992188	0.992188	0.997396		1
0.229167	0.994792	0.992188	0.992188		1.1
0.445312	0.997396	0.992188	0.994792		1.2
0.651042	0.997396	0.992188	0.997396		1.3
0.807292	0.997396	0.992188	0.997396		1.4
0.914062	0.997396	0.992188	0.992188		1.5
0.960938	0.997396	0.997396	0.997396		1.6
0.979167	0.997396	0.994792	0.997396		1.7
0.984375	0.997396	0.997396	0.997396		1.8
0.992188	0.997396	0.994792	0.997396		1.9
0.997396	0.997396	0.994792	0.997396		2
0.00506329	0.00253165	0.00506329	0.00506329		0.075	DHA method, fortificated, X direction
0.00253165	0.00506329	0	0.313924		0.15
0	0.00253165	0.162025	0.967089		0.225
0	0.00506329	0.792405	0.997468		0.3
0.00253165	0.00506329	0.982278	0.997468		0.375
0.00253165	0.00506329	0.994937	0.994937		0.45
0	0.0582278	0.997468	0.994937		0.525
0.00253165	0.243038	0.994937	0.997468		0.6
0.00506329	0.526582	0.994937	0.994937		0.675
0.00506329	0.76962	0.994937	0.994937		0.75
0.00253165	0.913924	0.994937	0.997468		0.825
0.00253165	0.972152	0.997468	0.997468		0.9
0.0202532	0.989873	0.994937	0.997468		0.975
0.0607595	0.994937	0.997468	0.997468		1.05
0.131646	0.994937	0.997468	0.997468		1.125
0.248101	0.997468	0.997468	0.997468		1.2
0.389873	0.994937	0.997468	0.994937		1.275
0.536709	0.997468	0.997468	0.997468		1.35
0.678481	0.997468	1	0.997468		1.425
0.779747	0.994937	0.994937	0.997468		1.5
0.00253165	0.00253165	0.00253165	0.00253165		0.075	DHA method, fortificated, X direction, frame-shear wall
0.00253165	0.00506329	0	0.131646		0.15
0.00506329	0.00506329	0.0455696	0.896203		0.225
0.00253165	0.00506329	0.559494	0.992405		0.3
0.00253165	0.00506329	0.936709	0.994937		0.375
0	0.00506329	0.994937	0.997468		0.45
0	0.0151899	0.997468	0.992405		0.525
0.00506329	0.0911392	0.997468	0.994937		0.6
0.00506329	0.286076	0.994937	0.997468		0.675
0.00506329	0.534177	0.994937	0.997468		0.75
0.00253165	0.764557	0.994937	0.992405		0.825
0.00759494	0.906329	0.997468	0.997468		0.9
0.0202532	0.967089	0.997468	0.994937		0.975
0.0607595	0.992405	0.997468	0.997468		1.05
0.136709	0.997468	0.997468	0.994937		1.125
0.24557	0.997468	0.997468	0.992405		1.2
0.392405	0.992405	0.997468	0.992405		1.275
0.536709	0.997468	0.992405	0.992405		1.35
0.673418	1	0.997468	0.992405		1.425
0.782278	0.997468	0.997468	0.992405		1.5
0.00178891	0.00357782	0.00357782	0.00178891		0.075	DHA method, fortificated, Y direction
0.00536673	0.00357782	0.00178891	0.168157		0.15
0.00357782	0.00536673	0.0679785	0.915921		0.225
0.00357782	0.00536673	0.615385	0.996422		0.3
0.00357782	0.00715564	0.948122	0.996422		0.375
0.00357782	0.00536673	0.994633	0.996422		0.45
0.00536673	0.019678	0.998211	0.996422		0.525
0.00178891	0.118068	0.998211	0.996422		0.6
0.00357782	0.322004	0.998211	0.996422		0.675
0.00357782	0.588551	0.994633	0.998211		0.75
0.00178891	0.792487	0.996422	0.996422		0.825
0.00178891	0.91771	0.996422	0.994633		0.9
0.00357782	0.969589	0.998211	0.998211		0.975
0.0178891	0.994633	0.998211	0.996422		1.05
0.0500894	0.996422	0.998211	0.996422		1.125
0.100179	0.996422	0.996422	0.996422		1.2
0.194991	0.998211	0.994633	0.998211		1.275
0.307692	0.994633	0.998211	0.994633		1.35
0.443649	0.998211	0.998211	0.996422		1.425
0.568873	0.998211	0.998211	0.998211		1.5
0.00178891	0.00357782	0.00178891	0.0483005		0.075	DHA method, fortificated, Y direction, frame-shear wall
0.00715564	0.00536673	0.318426	0.985689		0.15
0.00536673	0.00536673	0.9678	0.998211		0.225
0.00536673	0.0214669	0.996422	0.996422		0.3
0.00894454	0.252236	0.998211	0.998211		0.375
0.00894454	0.692308	0.998211	0.998211		0.45
0.00715564	0.928444	0.998211	0.996422		0.525
0.00536673	0.989267	1	1		0.6
0.00715564	0.996422	1	0.996422		0.675
0.0161002	0.996422	0.994633	0.998211		0.75
0.0626118	0.994633	0.998211	0.998211		0.825
0.16458	0.996422	0.998211	0.998211		0.9
0.322004	0.992844	0.996422	0.998211		0.975
0.506261	0.994633	1	0.998211		1.05
0.677996	0.994633	0.998211	0.998211		1.125
0.810376	0.996422	1	0.994633		1.2
0.90161	0.998211	1	0.998211		1.275
0.946333	0.996422	1	0.998211		1.35
0.973166	0.996422	1	0.998211		1.425
0.991055	0.994633	0.998211	0.998211		1.5
0.00986842	0.00986842	0.00986842	0.00986842		0.15	DHA method, 4-storey, unfortificated, X direction	SA
0.00657895	0.00986842	0.0361842	0.799342		0.3
0.00657895	0.0131579	0.703947	0.993421		0.45
0.00986842	0.00986842	0.993421	0.993421		0.6
0.00657895	0.0296053	0.996711	0.993421		0.75
0.00328947	0.217105	0.996711	0.996711		0.9
0.00328947	0.552632	0.996711	0.993421		1.05
0.00328947	0.845395	0.996711	0.996711		1.2
0.00328947	0.957237	0.993421	1		1.35
0.0230263	0.993421	0.990132	1		1.5
0.0822368	0.993421	0.996711	0.996711		1.65
0.217105	0.996711	0.996711	1		1.8
0.391447	0.996711	1	1		1.95
0.575658	0.996711	0.996711	1		2.1
0.730263	0.996711	0.996711	0.996711		2.25
0.851974	1	0.996711	0.996711		2.4
0.917763	0.996711	1	1		2.55
0.960526	1	1	0.996711		2.7
0.980263	1	0.996711	0.996711		2.85
0.993421	1	0.996711	0.996711		3
0.00986842	0.00986842	0.00657895	0.0131579		0.15	DHA method, 4-storey, fortificated, X direction
0.00986842	0.00986842	0.0328947	0.776316		0.3
0.00986842	0.0131579	0.555921	0.993421		0.45
0.00986842	0.00986842	0.970395	0.993421		0.6
0.00986842	0.0131579	0.993421	0.993421		0.75
0.00986842	0.118421	0.993421	0.993421		0.9
0.00657895	0.401316	0.993421	0.996711		1.05
0.00657895	0.720395	0.993421	0.996711		1.2
0.00657895	0.914474	0.993421	0.993421		1.35
0.00657895	0.976974	0.996711	0.996711		1.5
0.0361842	0.990132	0.993421	0.996711		1.65
0.111842	0.990132	0.996711	1		1.8
0.256579	0.996711	0.996711	0.996711		1.95
0.411184	0.993421	0.996711	0.996711		2.1
0.585526	0.993421	0.996711	0.996711		2.25
0.736842	0.996711	0.993421	0.996711		2.4
0.845395	0.996711	0.993421	1		2.55
0.917763	0.996711	0.996711	0.996711		2.7
0.957237	1	0.993421	0.996711		2.85
0.976974	1	0.993421	1		3
0.0130719	0.0163399	0.0130719	0.0359477		0.15	DHA method, 4-storey, unfortificated, Y direction
0.0163399	0.0130719	0.173203	0.944444		0.3
0.0163399	0.0130719	0.905229	0.996732		0.45
0.0130719	0.0163399	0.993464	0.996732		0.6
0.0130719	0.156863	0.996732	0.993464		0.75
0.0130719	0.51634	0.996732	0.993464		0.9
0.00980392	0.859477	0.996732	0.996732		1.05
0.00980392	0.970588	0.996732	1		1.2
0.0424837	0.993464	0.996732	0.996732		1.35
0.140523	0.993464	0.996732	1		1.5
0.310458	0.996732	0.996732	1		1.65
0.522876	0.996732	0.996732	1		1.8
0.715686	0.996732	0.996732	0.996732		1.95
0.852941	0.996732	0.996732	1		2.1
0.928105	0.996732	0.996732	1		2.25
0.96732	0.993464	0.996732	1		2.4
0.98366	0.996732	0.996732	1		2.55
0.990196	0.996732	1	1		2.7
0.996732	0.996732	1	1		2.85
1	0.993464	1	0.996732		3
0.00980392	0.00980392	0.00980392	0.0130719		0.15	DHA method, 4-storey, fortificated, Y direction
0.0130719	0.00980392	0.0228758	0.584967		0.3
0.0130719	0.00980392	0.437908	0.996732		0.45
0.0130719	0.00980392	0.941176	1		0.6
0.0130719	0.00980392	0.993464	0.996732		0.75
0.0130719	0.0686275	0.993464	1		0.9
0.0130719	0.297386	0.996732	1		1.05
0.0130719	0.611111	0.993464	1		1.2
0.00980392	0.856209	0.996732	1		1.35
0.00980392	0.954248	0.993464	0.996732		1.5
0.0196078	0.990196	0.993464	1		1.65
0.0555556	0.993464	0.996732	1		1.8
0.143791	1	0.996732	1		1.95
0.267974	0.996732	0.996732	1		2.1
0.428105	0.996732	0.996732	1		2.25
0.591503	0.996732	1	0.996732		2.4
0.745098	0.996732	0.996732	0.996732		2.55
0.852941	0.996732	1	0.996732		2.7
0.901961	0.996732	1	0.996732		2.85
0.95098	1	1	0.996732		3
0.00249377	0	0.00249377	0		0.1	DHA method, 6-storey, unfortificated, X direction
0	0	0.0249377	0.922693		0.2
0.00249377	0	0.765586	0.995012		0.3
0.00498753	0.00249377	0.992519	0.997506		0.4
0.00249377	0.0149626	0.992519	0.995012		0.5
0	0.17207	0.997506	0.997506		0.6
0.00249377	0.513716	0.997506	0.997506		0.7
0.00249377	0.815461	0.997506	0.997506		0.8
0.00249377	0.952618	0.997506	0.997506		0.9
0.0249377	0.990025	0.997506	0.995012		1
0.0897756	0.992519	0.997506	0.997506		1.1
0.23192	0.995012	0.995012	0.997506		1.2
0.408978	0.992519	0.995012	0.995012		1.3
0.608479	0.995012	0.995012	0.995012		1.4
0.755611	0.992519	0.997506	0.995012		1.5
0.870324	0.992519	0.997506	0.995012		1.6
0.935162	0.995012	0.995012	0.995012		1.7
0.972569	0.997506	0.997506	0.995012		1.8
0.987531	1	0.997506	0.995012		1.9
0.995012	1	0.997506	0.997506		2
0.00249377	0.00249377	0	0.00249377		0.1	DHA method, 6-storey, fortificated, X direction
0.00498753	0.00249377	0.00249377	0.922693		0.2
0.00498753	0.00498753	0.628429	0.997506		0.3
0.00249377	0.00498753	0.982544	0.995012		0.4
0.00249377	0.00498753	0.992519	0.995012		0.5
0.00498753	0.0947631	0.995012	0.995012		0.6
0.00498753	0.38404	0.995012	0.995012		0.7
0.00498753	0.708229	0.997506	0.995012		0.8
0.00498753	0.915212	0.997506	0.997506		0.9
0.00997506	0.977556	0.997506	0.997506		1
0.0448878	0.992519	0.997506	0.997506		1.1
0.134663	0.997506	0.997506	0.997506		1.2
0.289277	0.997506	0.997506	0.997506		1.3
0.46384	0.992519	0.995012	0.997506		1.4
0.633416	0.997506	0.995012	0.995012		1.5
0.778055	0.997506	0.997506	0.997506		1.6
0.877805	0.997506	0.995012	0.997506		1.7
0.935162	0.997506	0.997506	0.997506		1.8
0.967581	0.997506	0.997506	0.997506		1.9
0.985037	0.997506	0.997506	0.997506		2
0.00411523	0.00411523	0.00411523	0.0144033		0.1	DHA method, 6-storey, unfortificated, Y direction
0.00617284	0.00617284	0.251029	0.979424		0.2
0.00617284	0.00411523	0.958848	0.993827		0.3
0.00617284	0.0185185	0.995885	0.995885		0.4
0.00823045	0.220165	0.995885	0.995885		0.5
0.00617284	0.644033	0.995885	0.997942		0.6
0.00205761	0.923868	0.995885	0.995885		0.7
0.0123457	0.985597	0.997942	0.995885		0.8
0.0761317	0.995885	0.997942	0.997942		0.9
0.226337	0.997942	0.997942	1		1
0.427984	0.997942	0.997942	1		1.1
0.654321	0.997942	0.997942	0.997942		1.2
0.825103	0.997942	0.997942	0.997942		1.3
0.915638	0.997942	0.997942	0.997942		1.4
0.962963	0.997942	0.997942	0.997942		1.5
0.983539	1	0.997942	1		1.6
0.993827	1	0.995885	0.997942		1.7
0.997942	0.997942	0.997942	1		1.8
0.995885	0.997942	0.993827	1		1.9
0.997942	0.997942	0.997942	1		2
0.00205761	0.00205761	0	0.00411523		0.1	DHA method, 6-storey, fortificated, Y direction
0.00411523	0.00205761	0.0123457	0.802469		0.2
0.00617284	0.00411523	0.641975	0.995885		0.3
0.00205761	0.00411523	0.985597	0.997942		0.4
0.00411523	0.0144033	0.997942	0.995885		0.5
0	0.156379	0.997942	1		0.6
0.00411523	0.497942	0.997942	0.997942		0.7
0.00617284	0.800412	0.997942	0.995885		0.8
0.00411523	0.944444	0.997942	0.997942		0.9
0.0102881	0.985597	1	1		1
0.0493827	0.995885	0.997942	0.997942		1.1
0.146091	0.995885	0.997942	0.997942		1.2
0.290123	0.995885	0.997942	1		1.3
0.475309	0.995885	0.993827	1		1.4
0.641975	0.995885	0.995885	1		1.5
0.779835	0.995885	0.995885	1		1.6
0.882716	0.995885	0.997942	1		1.7
0.934156	0.99177	0.995885	1		1.8
0.969136	0.995885	0.997942	1		1.9
0.981481	1	0.997942	0.997942		2
0.0018797	0.0037594	0.0018797	0.0018797		0.1	DHA method, 8-storey, unfortificated, X direction
0.0018797	0.0018797	0.0620301	0.898496		0.2
0.0037594	0.0056391	0.81203	0.994361		0.3
0.0018797	0.0037594	0.996241	0.994361		0.4
0.0018797	0.0394737	0.994361	0.996241		0.5
0.0018797	0.295113	0.996241	0.99812		0.6
0.0037594	0.672932	0.994361	0.996241		0.7
0.0037594	0.896617	0.996241	0.996241		0.8
0.0056391	0.979323	0.99812	0.994361		0.9
0.037594	0.994361	0.99812	0.99812		1
0.12218	0.994361	0.996241	0.99812		1.1
0.274436	0.996241	0.99812	0.996241		1.2
0.473684	0.996241	0.994361	0.99812		1.3
0.657895	0.996241	0.994361	1		1.4
0.796992	0.99812	0.994361	0.99812		1.5
0.894737	0.996241	0.996241	0.99812		1.6
0.949248	0.996241	0.996241	0.996241		1.7
0.973684	0.99812	0.994361	0.99812		1.8
0.988722	0.99812	0.996241	0.99812		1.9
0.996241	0.996241	0.996241	0.996241		2
0.0018797	0.0018797	0.0037594	0.0018797		0.1	DHA method, 8-storey, fortificated, X direction
0.0037594	0.0018797	0.0056391	0.629699		0.2
0.0037594	0.0037594	0.503759	0.996241		0.3
0.0037594	0.0037594	0.954887	0.99812		0.4
0.0037594	0.0056391	0.992481	0.99812		0.5
0.0018797	0.0620301	0.99812	0.996241		0.6
0.0056391	0.291353	0.996241	0.996241		0.7
0.0037594	0.62218	0.99812	0.996241		0.8
0.0056391	0.853383	0.99812	0.99812		0.9
0.0018797	0.962406	1	0.996241		1
0.0112782	0.988722	0.99812	0.994361		1.1
0.0469925	0.99812	0.99812	0.996241		1.2
0.140977	0.996241	0.996241	0.996241		1.3
0.278195	0.99812	0.996241	0.996241		1.4
0.43797	0.99812	0.994361	0.99812		1.5
0.607143	0.99812	0.994361	0.994361		1.6
0.742481	0.996241	0.99812	0.996241		1.7
0.847744	0.994361	0.99812	0.996241		1.8
0.919173	0.994361	0.99812	0.99812		1.9
0.953008	0.996241	1	0.99812		2
0.00383142	0.00383142	0	0.0344828		0.1	DHA method, 8-storey, unfortificated, Y direction
0.00383142	0.00574713	0.329502	0.98659		0.2
0.00574713	0.00766284	0.977011	0.996169		0.3
0.00766284	0.0268199	0.994253	0.992337		0.4
0.00574713	0.306513	0.994253	0.996169		0.5
0.00574713	0.741379	0.996169	0.996169		0.6
0.00766284	0.948276	0.994253	0.998084		0.7
0.0268199	0.988506	0.998084	1		0.8
0.12069	0.990421	0.994253	1		0.9
0.312261	0.990421	1	1		1
0.544061	0.990421	1	1		1.1
0.747126	0.990421	1	1		1.2
0.87931	0.992337	1	1		1.3
0.948276	0.992337	1	1		1.4
0.978927	0.990421	1	1		1.5
0.988506	0.992337	1	1		1.6
0.994253	0.992337	1	1		1.7
0.998084	0.992337	1	1		1.8
1	0.992337	1	0.998084		1.9
1	0.992337	0.998084	1		2
0	0	0.00191571	0.00383142		0.1	DHA method, 8-storey, fortificated, Y direction
0.00766284	0.00191571	0.0191571	0.781609		0.2
0.00383142	0.00383142	0.653257	0.996169		0.3
0.00191571	0.00383142	0.980843	0.996169		0.4
0.00383142	0.0114943	0.992337	1		0.5
0.00191571	0.14751	0.994253	1		0.6
0.00383142	0.469349	0.994253	0.996169		0.7
0.00574713	0.785441	0.994253	1		0.8
0.00766284	0.942529	0.998084	0.998084		0.9
0.0114943	0.98659	0.996169	1		1
0.0536398	0.992337	0.996169	1		1.1
0.141762	0.992337	0.998084	1		1.2
0.289272	0.994253	0.998084	1		1.3
0.475096	0.998084	0.998084	0.998084		1.4
0.649425	0.996169	1	0.998084		1.5
0.783525	0.996169	1	1		1.6
0.881226	0.996169	0.998084	1		1.7
0.938697	0.996169	0.998084	0.998084		1.8
0.971264	0.996169	0.998084	0.998084		1.9
0.98659	0.996169	0.996169	0.994253		2
0.00372439	0.00744879	0.00744879	0.00744879		0.1	DHA method, fortificated, X direction
0.00558659	0.00372439	0.0614525	0.916201		0.2
0.00558659	0.00744879	0.867784	0.994413		0.3
0.00744879	0.00931099	0.994413	0.996276		0.4
0.00931099	0.0595903	0.998138	0.996276		0.5
0.00744879	0.363128	1	0.996276		0.6
0.00558659	0.741155	1	0.998138		0.7
0.0111732	0.936685	1	0.996276		0.8
0.0204842	0.986965	0.998138	0.994413		0.9
0.0689013	0.994413	1	0.994413		1
0.188082	0.998138	1	0.990689		1.1
0.368715	0.998138	0.998138	0.996276		1.2
0.569832	0.998138	0.994413	0.996276		1.3
0.756052	0.998138	0.996276	0.998138		1.4
0.871508	0.996276	0.998138	0.998138		1.5
0.918063	0.992551	1	0.996276		1.6
0.962756	0.994413	0.996276	0.998138		1.7
0.992551	0.996276	0.996276	0.996276		1.8
0.992551	0.998138	0.998138	0.998138		1.9
0.994413	0.996276	0.998138	1		2
0.00744879	0.00558659	0.00372439	0.00372439		0.1	DHA method, fortificated, X direction, frame-shear wall
0.00558659	0.00558659	0.00744879	0.214153		0.2
0.00931099	0.00744879	0.0986965	0.964618		0.3
0.00372439	0.00744879	0.715084	0.996276		0.4
0.00931099	0.00744879	0.975791	0.996276		0.5
0.00931099	0.00931099	0.994413	0.994413		0.6
0.0111732	0.0409683	0.996276	0.994413		0.7
0.0111732	0.195531	0.996276	0.998138		0.8
0.0111732	0.47486	0.998138	0.998138		0.9
0.00931099	0.739292	0.996276	0.996276		1
0.00931099	0.901304	0.996276	0.996276		1.1
0.018622	0.968343	0.994413	0.996276		1.2
0.0502793	0.990689	0.994413	0.996276		1.3
0.113594	0.992551	1	0.998138		1.4
0.232775	0.996276	0.998138	0.996276		1.5
0.379888	0.996276	1	0.998138		1.6
0.532588	0.996276	1	0.996276		1.7
0.67784	0.998138	1	0.994413		1.8
0.793296	0.996276	1	0.994413		1.9
0.869646	0.998138	1	1		2
0.00368324	0.00736648	0.00184162	0.00368324		0.1	DHA method, fortificated, Y direction
0.00368324	0.00368324	0.00184162	0.600368		0.2
0.00552486	0.00552486	0.399632	0.994475		0.3
0.00736648	0.00552486	0.944751	0.996317		0.4
0.00552486	0.00736648	0.998158	0.996317		0.5
0.00552486	0.0441989	0.996317	0.996317		0.6
0.00552486	0.243094	0.994475	1		0.7
0.00368324	0.578269	0.998158	0.996317		0.8
0.00552486	0.837937	0.996317	0.994475		0.9
0.00552486	0.952118	0.996317	0.996317		1
0.0184162	0.987109	0.998158	1		1.1
0.0478821	0.990792	0.998158	0.998158		1.2
0.117864	0.992634	0.998158	1		1.3
0.246777	0.996317	1	1		1.4
0.410681	0.994475	0.996317	1		1.5
0.578269	0.994475	1	1		1.6
0.723757	0.994475	0.998158	0.998158		1.7
0.836096	0.994475	1	0.996317		1.8
0.902394	0.998158	0.996317	0.996317		1.9
0.937385	0.996317	0.996317	0.994475		2
0.00368324	0.00184162	0.00552486	0.00368324		0.1	DHA method, fortificated, Y direction, frame-shear wall
0.00736648	0.00552486	0.0092081	0.598527		0.2
0.00736648	0.00552486	0.445672	0.994475		0.3
0.00552486	0.00552486	0.952118	0.998158		0.4
0.00368324	0.00736648	0.994475	0.996317		0.5
0.00552486	0.0460405	0.994475	0.996317		0.6
0.0092081	0.246777	0.992634	0.994475		0.7
0.00736648	0.574586	0.994475	0.994475		0.8
0.00368324	0.836096	0.994475	0.994475		0.9
0.00552486	0.952118	0.994475	0.996317		1
0.00368324	0.985267	0.992634	0.996317		1.1
0.00368324	0.990792	0.994475	0.994475		1.2
0.00552486	0.990792	0.994475	0.992634		1.3
0.0165746	0.992634	0.994475	0.992634		1.4
0.0423573	0.990792	0.996317	0.992634		1.5
0.0994475	0.98895	0.996317	0.996317		1.6
0.184162	0.98895	0.994475	0.992634		1.7
0.300184	0.990792	0.996317	0.994475		1.8
0.430939	0.990792	0.998158	0.994475		1.9
0.552486	0.998158	1	0.990792		2
0	0.00238095	0.00238095	0		0.05	MIDA method, RC frame-core wall	SA	Zheng & Yang	2015
0.00238095	0.00714286	0.00238095	0.0285714		0.1
0.00714286	0.00714286	0.0047619	0.5		0.15
0.0047619	0.00714286	0	0.961905		0.2
0.0047619	0.0047619	0.0190476	0.997619		0.25
0	0.00714286	0.097619	1		0.3
0.00238095	0.0047619	0.238095	1		0.35
0.0047619	0.0119048	0.414286	1		0.4
0.0047619	0.0357143	0.585714	0.997619		0.45
0.00238095	0.0714286	0.721429	1		0.5
0.00238095	0.12619	0.830952	0.997619		0.55
0.0119048	0.192857	0.904762	1		0.6
0.0214286	0.261905	0.942857	1		0.65
0.0333333	0.342857	0.969048	0.997619		0.7
0.0547619	0.421429	0.978571	1		0.75
0.0761905	0.504762	0.990476	0.997619		0.8
0.104762	0.57619	0.997619	0.997619		0.85
0.135714	0.642857	0.997619	0.997619		0.9
0.180952	0.702381	1	0.997619		0.95
0.209524	0.747619	1	0.997619		1
0	0	0.00348432	0.0522648		0.05	steel-concrete with floor effect （组合梁方钢管混凝土柱框架结构CB-CFST）	PGA	Liu & Liu	2010
0.00348432	0.00348432	0	0.662021		0.1
0.00348432	0.00348432	0.0313589	0.944251		0.15
0.00348432	0.00348432	0.139373	0.989547		0.2
0.00348432	0	0.341463	0.996516		0.25
0.00348432	0.00348432	0.574913	0.996516		0.3
0.00348432	0.00696864	0.756098	0.996516		0.35
0.00348432	0.0174216	0.874564	1		0.4
0.00348432	0.0418118	0.940767	1		0.45
0.00696864	0.0766551	0.968641	0.996516		0.5
0.0139373	0.12892	0.982578	1		0.55
0.0243902	0.198606	0.989547	1		0.6
0.0452962	0.285714	0.993031	0.996516		0.65
0.0627178	0.365854	0.996516	0.996516		0.7
0	0	0	0.0278746		0.05	steel-concrete without floor effect （钢梁方钢管混凝土柱框架结构SB-CFST）
0	0	0	0.480836		0.1
0	0.00348432	0.0522648	0.843206		0.15
0.00348432	0.00348432	0.181185	0.965157		0.2
0.00348432	0.00348432	0.372822	0.996516		0.25
0.00348432	0.00348432	0.578397	0.996516		0.3
0.00348432	0.0174216	0.749129	0.996516		0.35
0.00348432	0.0313589	0.850174	0.996516		0.4
0.00348432	0.0696864	0.916376	1		0.45
0.00696864	0.111498	0.95122	0.996516		0.5
0.0174216	0.174216	0.968641	1		0.55
0.0243902	0.240418	0.97561	0.996516		0.6
0.0418118	0.317073	0.982578	0.996516		0.65
0.0627178	0.38676	0.989547	0.996516		0.7
0.00480769	0.00961538	0.00961538	0.00480769		0.05	0.1g fortification	PGA	Gan, master	2009
0.00961538	0.00961538	0.0192308	0.0817308		0.1
0.0192308	0.0288462	0.120192	0.274038		0.15
0.0192308	0.0673077	0.283654	0.5		0.2
0.0192308	0.144231	0.447115	0.663462		0.25
0.0192308	0.240385	0.591346	0.783654		0.3
0.0144231	0.336538	0.711538	0.865385		0.35
0.0192308	0.442308	0.793269	0.913462		0.4
0.0192308	0.538462	0.846154	0.942308		0.45
0.0240385	0.620192	0.894231	0.961538		0.5
0.0288462	0.692308	0.923077	0.971154		0.55
0.0432692	0.754808	0.947115	0.980769		0.6
0.0625	0.802885	0.951923	0.985577		0.65
0.0769231	0.841346	0.961538	0.985577		0.7
0.0961538	0.870192	0.971154	0.990385		0.75
0.125	0.894231	0.975962	0.990385		0.8
0.144231	0.913462	0.980769	0.995192		0.85
0.173077	0.927885	0.985577	0.995192		0.9
0.206731	0.9375	0.985577	0.995192		0.95
0.240385	0.947115	0.990385	0.995192		1
0.264423	0.951923	0.990385	0.995192		1.05
0.293269	0.956731	0.985577	0.995192		1.1
0.326923	0.961538	0.985577	0.995192		1.15
0.360577	0.971154	0.985577	0.995192		1.2
0.00806452	0.00806452	0.00403226	0.00403226		0.05	0.15g fortification
0.00806452	0.00806452	0.0120968	0.0403226		0.1
0.00806452	0.00806452	0.0766129	0.193548		0.15
0.00806452	0.0282258	0.197581	0.395161		0.2
0.00806452	0.0806452	0.350806	0.572581		0.25
0.00806452	0.157258	0.491935	0.709677		0.3
0.00806452	0.258065	0.612903	0.806452		0.35
0.00806452	0.342742	0.709677	0.870968		0.4
0.00806452	0.439516	0.790323	0.91129		0.45
0.0120968	0.532258	0.842742	0.939516		0.5
0.0120968	0.600806	0.887097	0.959677		0.55
0.0201613	0.669355	0.919355	0.975806		0.6
0.0322581	0.729839	0.935484	0.975806		0.65
0.0403226	0.774194	0.955645	0.983871		0.7
0.0524194	0.814516	0.959677	0.987903		0.75
0.0766129	0.846774	0.967742	0.987903		0.8
0.0927419	0.875	0.971774	0.991935		0.85
0.112903	0.891129	0.975806	0.995968		0.9
0.141129	0.907258	0.979839	0.995968		0.95
0.165323	0.927419	0.987903	1		1
0.189516	0.935484	0.991935	1		1.05
0.21371	0.943548	0.987903	1		1.1
0.245968	0.947581	0.991935	0.995968		1.15
0.270161	0.959677	0.991935	1		1.2
0	0.003367	0	0		0.05	0.2g fortification
0.003367	0	0.003367	0.023569		0.1
0.00673401	0.00673401	0.0505051	0.141414		0.15
0.010101	0.013468	0.148148	0.3367		0.2
0.00673401	0.0606061	0.289562	0.518519		0.25
0.00673401	0.121212	0.444444	0.6633		0.3
0.00673401	0.198653	0.552189	0.760943		0.35
0.00673401	0.292929	0.656566	0.838384		0.4
0.00673401	0.383838	0.750842	0.902357		0.45
0.010101	0.47138	0.814815	0.929293		0.5
0.013468	0.552189	0.858586	0.952862		0.55
0.013468	0.622896	0.895623	0.96633		0.6
0.026936	0.693603	0.929293	0.979798		0.65
0.03367	0.737374	0.946128	0.989899		0.7
0.040404	0.781145	0.956229	0.989899		0.75
0.0606061	0.821549	0.962963	0.989899		0.8
0.0740741	0.855219	0.969697	0.996633		0.85
0.0875421	0.878788	0.969697	0.996633		0.9
0.111111	0.89899	0.973064	0.996633		0.95
0.13468	0.909091	0.976431	0.996633		1
0.161616	0.929293	0.976431	0.996633		1.05
0.181818	0.942761	0.979798	0.996633		1.1
0.205387	0.949495	0.983165	0.996633		1.15
0.228956	0.956229	0.979798	1		1.2
0.0112045	0.0112045	0.00840336	0.00560224		0.05	0.3g fortification
0.00840336	0.0112045	0.00560224	0.0112045		0.1
0.0112045	0.0112045	0.0140056	0.0532213		0.15
0.0112045	0.0140056	0.0504202	0.154062		0.2
0.0140056	0.0168067	0.123249	0.268908		0.25
0.00840336	0.0364146	0.215686	0.403361		0.3
0.0140056	0.0672269	0.313725	0.540616		0.35
0.0140056	0.12605	0.428571	0.647059		0.4
0.0140056	0.173669	0.52381	0.728291		0.45
0.0168067	0.2493	0.605042	0.792717		0.5
0.0196078	0.313725	0.683473	0.845938		0.55
0.0168067	0.37535	0.747899	0.890756		0.6
0.0196078	0.439776	0.789916	0.915966		0.65
0.0196078	0.501401	0.829132	0.929972		0.7
0.0196078	0.563025	0.862745	0.946779		0.75
0.022409	0.610644	0.89916	0.960784		0.8
0.0252101	0.661064	0.910364	0.971989		0.85
0.0252101	0.703081	0.929972	0.985994		0.9
0.0336134	0.736695	0.941176	0.991597		0.95
0.0420168	0.770308	0.955182	0.997199		1
0.0504202	0.798319	0.960784	0.997199		1.05
0.0560224	0.831933	0.963585	0.997199		1.1
0.0728291	0.854342	0.969188	1		1.15
0.0812325	0.868347	0.971989	1		1.2
0.00668896	0.00668896	0.00668896	0.00668896		0.05	0.4g fortification
0.00668896	0.00668896	0.00668896	0.00668896		0.1
0.00668896	0.00668896	0.00668896	0.00668896		0.15
0.00668896	0.00334448	0.00668896	0.0401338		0.2
0.00668896	0.00668896	0.0267559	0.09699		0.25
0.00668896	0.0100334	0.0668896	0.180602		0.3
0.00334448	0.0167224	0.113712	0.274247		0.35
0.00668896	0.0334448	0.187291	0.374582		0.4
0.00668896	0.0468227	0.257525	0.471572		0.45
0.00668896	0.0802676	0.331104	0.555184		0.5
0.00668896	0.113712	0.411371	0.628763		0.55
0.00668896	0.150502	0.481605	0.692308		0.6
0.00668896	0.200669	0.551839	0.752508		0.65
0.00668896	0.244147	0.608696	0.792642		0.7
0.00668896	0.294314	0.662207	0.832776		0.75
0.00668896	0.341137	0.702341	0.862876		0.8
0.00668896	0.391304	0.742475	0.889632		0.85
0.0100334	0.428094	0.782609	0.916388		0.9
0.0100334	0.474916	0.80602	0.926421		0.95
0.0100334	0.51505	0.832776	0.939799		1
0.0133779	0.561873	0.856187	0.949833		1.05
0.0167224	0.595318	0.882943	0.963211		1.1
0.0200669	0.628763	0.896321	0.9699		1.15
0.0234114	0.655518	0.909699	0.976589		1.2

## Sheet: industrial frame
collapse	serious damage	medium damage	slight damage	no damage
0	0	0.03	0.19	0.78	0.1	PGA	fuzzy and push-over	Li & Wen	2012
0	0.01	0.08	0.55	0.36	0.15
0.01	0.05	0.4	0.48	0.06	0.2
0.06	0.2	0.53	0.19	0.02	0.3
0.11	0.5	0.34	0.05	0	0.4
0.65	0.26	0.09	0	0	0.6
0	0	0	0.05	0.95	6			Chen et al.	2017
0	0	0.02	0.08	0.9	7
0	0.02	0.07	0.28	0.63	6		analytical using Yin(1995)	Chen et al.	1999
0.01	0.04	0.11	0.27	0.57	7
0.04	0.11	0.2	0.26	0.39	8
0.11	0.2	0.27	0.23	0.19	9
0.00196078	0.00392157	0.00588235	0.0313725		0.15	SA	HAD mehtod, unfortificated, X direction	Zhu, PhD	2010
0.00588235	0.00196078	0.045098	0.986275		0.3
0.00784314	0.00588235	0.839216	0.996078		0.45
0.00588235	0.00392157	0.996078	0.996078		0.6
0.00196078	0.0666667	0.996078	0.998039		0.75
0.00588235	0.378431	0.994118	0.994118		0.9
0.00784314	0.760784	0.994118	0.996078		1.05
0.00784314	0.95098	0.998039	0.998039		1.2
0.00588235	0.994118	1	0.998039		1.35
0.00784314	0.994118	0.998039	1		1.5
0.0352941	0.998039	1	1		1.65
0.113725	0.998039	1	0.998039		1.8
0.25098	0.998039	0.996078	0.998039		1.95
0.419608	0.998039	0.994118	0.994118		2.1
0.601961	0.996078	0.996078	0.994118		2.25
0.75098	0.994118	0.996078	0.994118		2.4
0.85098	0.994118	0.996078	0.996078		2.55
0.923529	0.996078	0.996078	0.994118		2.7
0.956863	0.996078	0.992157	0.996078		2.85
0.978431	0.998039	0.994118	0.994118		3
0.00392157	0.00392157	0.00392157	0.00196078		0.15		HAD mehtod, fortificated, X direction
0.00392157	0.00196078	0.00196078	0.405882		0.3
0.00392157	0.00588235	0.0882353	0.992157		0.45
0.00588235	0.00588235	0.694118	0.996078		0.6
0.00588235	0.00196078	0.970588	0.994118		0.75
0.00980392	0.00588235	0.990196	0.998039		0.9
0.00784314	0.0117647	0.994118	0.996078		1.05
0.00784314	0.0705882	0.992157	0.996078		1.2
0.00588235	0.245098	0.994118	0.996078		1.35
0.00784314	0.501961	0.996078	0.998039		1.5
0.00196078	0.737255	0.998039	0.998039		1.65
0.00588235	0.884314	0.996078	0.994118		1.8
0.00784314	0.95098	0.996078	0.992157		1.95
0.0294118	0.982353	0.998039	1		2.1
0.072549	0.992157	0.998039	1		2.25
0.152941	0.994118	0.998039	0.996078		2.4
0.276471	0.994118	0.998039	0.994118		2.55
0.411765	1	0.998039	0.996078		2.7
0.55098	0.996078	0.996078	0.994118		2.85
0.67451	0.998039	0.998039	0.996078		3
0.00352734	0.00352734	0.00352734	0.195767		0.15		HAD mehtod, unfortificated, Y direction
0.00352734	0.00529101	0.677249	0.992945		0.3
0.00352734	0.00176367	0.996473	0.998236		0.45
0.00176367	0.0352734	0.991182	0.998236		0.6
0.00352734	0.816578	0.991182	0.998236		0.75
0.00352734	0.968254	0.992945	0.996473		0.9
0.00176367	0.994709	0.992945	0.998236		1.05
0.015873	0.994709	0.996473	0.998236		1.2
0.0793651	0.996473	0.996473	1		1.35
0.238095	0.998236	0.998236	1		1.5
0.45679	0.996473	0.994709	0.994709		1.65
0.687831	0.996473	0.996473	0.994709		1.8
0.844797	0.996473	0.998236	0.992945		1.95
0.934744	0.996473	0.998236	0.992945		2.1
0.970018	1	0.998236	0.996473		2.25
0.989418	0.998236	0.994709	0.996473		2.4
0.996473	0.998236	0.996473	0.998236		2.55
0.998236	0.998236	0.996473	0.994709		2.7
0.998236	0.996473	0.996473	1		2.85
0.996473		0.998236	0.998236		3
0.00352734	0.00176367	0	0.021164		0.15		HAD mehtod, fortificated, Y direction
0.00352734	0.00352734	0.223986	0.991182		0.3
0.00352734	0.00176367	0.964727	0.992945		0.45
0.00176367	0.00176367	0.998236	0.994709		0.6
0.00352734	0.031746	0.996473	0.994709		0.75
0.00352734	0.261023	0.994709	0.994709		0.9
0.00176367	0.654321	0.998236	0.994709		1.05
0.00352734	0.895944	0.998236	0.996473		1.2
0.00176367	0.977072	0.992945	0.996473		1.35
0.00352734	0.994709	0.992945	0.996473		1.5
0.015873	0.996473	0.998236	0.992945		1.65
0.0511464	0.998236	0.994709	0.996473		1.8
0.137566	0.996473	0.996473	0.996473		1.95
0.291005	0.996473	0.996473	0.992945		2.1
0.449735	0.998236	0.998236	0.992945		2.25
0.626102	0.998236	0.998236	0.992945		2.4
0.768959	0.994709	1	0.994709		2.55
0.864198	0.991182	0.996473	0.992945		2.7
0.922399	0.992945	0.998236	0.996473		2.85
0.955908	0.992945	0.996473	0.998236		3

## Sheet: stone-wood
collapse	serious damage	medium damage	slight damage	no damage
0	0.02	0.12	0.11	0.75	6		Chen et al.	2017
0	0.11	0.43	0.32	0.14	7
0	0.01	0.09	0.12	0.78	6
0	0.13	0.54	0.22	0.11	7
0.07	0.42	0.35	0.12	0.04	8
0	0	0.053	0.206	0.741	6	others	Li et al.	2013
0	0.068	0.2	0.338	0.394	7
0.055	0.294	0.398	0.18	0.073	8
0.135	0.429	0.351	0.085	0	9
0	0	0.05	0.42	0.53	6	others	Wei et al.	2008
0	0.03	0.42	0.41	0.14	7
0.02	0.28	0.54	0.16	0	8
0.22	0.49	0.25	0.04	0	9
0.72	0.25	0.03	0	0	10
0.025	0.165	0.225	0.265	0.325	6	others	He & Fu	2009
0.19	0.26	0.2	0.185	0.165	7
0.375	0.27	0.165	0.12	0.07	8
0.5	0.25	0.14	0.085	0.025	9
0.735	0.175	0.075	0.015	0	10
0	0	0.08	0.22	0.7	6		Sun et al.	2014
0.06	0.11	0.16	0.37	0.3	7
0.25	0.35	0.21	0.1	0.09	8
0.49	0.35	0.16	0	0	9
0.81	0.19	0	0	0	10

## Sheet: Chuandou-timber
collapse	serious damage	medium damage	slight damage	no damage
0	0	0.02	0.13	0.85	6		Chen et al.	2017
0	0	0.18	0.32	0.5	7
0	0	0.06	0.21	0.73	6		Piao, master	2013
0	0.04	0.19	0.32	0.45	7
0.01	0.19	0.4	0.33	0.08	8
0.14	0.44	0.28	0.14	0	9
0.28	0.46	0.25	0.01	0	10
0	0	0.08	0.22	0.7	6
0	0.07	0.22	0.3	0.41	7
0.06	0.23	0.44	0.22	0.05	8
0.17	0.48	0.3	0.05	0	9
0.31	0.49	0.2	0	0	10
0	0	0.04	0.15	0.81	6
0	0.02	0.2	0.3	0.48	7
0	0.16	0.37	0.35	0.12	8
0.09	0.41	0.35	0.14	0.01	9
0.22	0.43	0.29	0.06	0	10
0	0	0.05	0.23	0.72	6		Sun et al.	2012
0	0.04	0.21	0.32	0.43	7
0.01	0.19	0.39	0.33	0.08	8
0.13	0.45	0.3	0.12	0	9
0.26	0.47	0.26	0.01	0	10
0	0	0.04	0.21	0.75	6
0	0.03	0.19	0.32	0.46	7
0.005	0.175	0.38	0.34	0.1	8
0.11	0.44	0.31	0.14	0	9
0.24	0.46	0.3	0	0	10
0	0	0.05	0.22	0.73	6
0	0.04	0.2	0.31	0.45	7
0.005	0.185	0.39	0.33	0.09	8
0.12	0.44	0.32	0.12	0	9
0.25	0.46	0.285	0.005	0	10

## Sheet: wood
collapse	serious damage	medium damage	slight damage	no damage
0.017	0.364			0.619	7		Ge et al.	2014
0	0.068			0.932	6
0.01	0.021	0.0455	0.219	0.705	6		Qiu & Gao	2015
0.05	0.13	0.251	0.291	0.278	7
0.12	0.378	0.274	0.185	0.043	8
0.439	0.282	0.211	0.057	0.011	9
0.599	0.265	0.105	0.026	0.005	10
0	0	0.04	0.51	0.45	6		Wei et al.	2008
0	0.06	0.31	0.45	0.18	7
0.05	0.22	0.51	0.22	0	8
0.34	0.42	0.24	0	0	9
0.58	0.34	0.08	0	0	10

[truncated: 2 more sheets: stone, soil]
