# Supplementary material for: Review article: Review of fragility analyses for major building types in China with new implications for intensity–PGA relation development
Source: Copernicus journal article supplement (doi:10.5194/nhess-20-643-2020), 2020-02-27
Supplement: Supplementary file 3 [file nhess-20-643-2020-supplement.zip › supplements_20190528/[step3]China_fragility_classification.xlsx]

## Sheet: soil-wood
collapse	serious damage	medium damage	slight damage	no damage	Intensity		LS1	LS2	LS3	LS4
0.004	0.107	0.367	0.374	0.148	6		0.852	0.478	0.111	0.004		Chang et al.	2012		0.3033	0.6695			0.0272	8	Zhou et al.	2011
0.355	0.397	0.164	0.057	0.027	8		0.973	0.916	0.752	0.355		Shi et al.	2013		0.0117	0.2771			0.7118	6	He et al.	2016
0.14	0.213	0.255	0.236	0.156	7		0.844	0.608	0.353	0.14					0.086	0.5375			0.3763	7
0.033	0.06	0.105	0.194	0.608	6		0.392	0.198	0.093	0.033					0.2881	0.607			0.1055	8
0	0.03	0.15	0.32	0.5	6		0.5	0.18	0.03	0		Qiu & Gao	2015		0.591	0.409			0	9
0.075	0.134	0.256	0.34	0.195	7		0.805	0.465	0.209	0.075					78.75	21.25			0	10	Yuan	2008
0.282	0.28	0.29	0.07	0.078	8		0.922	0.852	0.562	0.282					68.83	28.19			0	9
0.602	0.17	0.165	0.037	0.026	9		0.974	0.937	0.772	0.602					20.06	47.37			32.57	8
0.878	0.095	0.02	0.007	0	10		1	0.993	0.973	0.878					8.86	25.78			65.36	7
0.025	0.165	0.225	0.265	0.325	6		0.675	0.415	0.19	0.025		Wang, master	2007		0.0117	0.2771			0.7118	6	Yang	2017
0.19	0.26	0.2	0.185	0.165	7		0.835	0.65	0.45	0.19					0.086	0.5375			0.3763	7
0.375	0.27	0.165	0.12	0.07	8		0.93	0.81	0.645	0.375					0.2881	0.607			0.1055	8
0.5	0.25	0.14	0.085	0.025	9		0.975	0.89	0.75	0.5					0.591	0.409			0	9
0.73	0.17	0.075	0.015	0	10		1	0.975	0.9	0.73					0.0277	0.166			0.8182	6
0.0338	0.1294	0.1739	0.2522	0.4104	7		0.5896	0.3371	0.1632	0.0338		Wang	2008		0.0242	0.2009			0.7749	7
0.4274	0.272	0.1748	0.1101	0.0155	8		0.9845	0.8742	0.6994	0.4274					0.5872	0.3788			0.0341	8
1	0	0	0	0	9		1	1	1	1					0.063	0.191	0.47	0.76		0.1	Fang, book	2011	PGA, <0.05g fortification, raw soil and stone
0.0225	0.0093	0.1001	0.2433	0.6915	6		0.3085	0.1319	0.0318	0.0225	VII fortification	Yang	2017		0.24	0.487	0.77	0.94		0.2
0.0392	0.0642	0.2213	0.3495	0.4056	7		0.5944	0.3247	0.1034	0.0392					0.41	0.67	0.89	0.98		0.3
0.1446	0.1901	0.3731	0.3211	0.0563	8		0.9437	0.7078	0.3347	0.1446					0.55	0.78	0.93	0.99		0.4
0.0095	0.0117	0.0939	0.2679	0.661	6		0.339	0.1151	0.0212	0.0095	VIII fortification				0.65	0.85	0.96	0.99		0.5
0.006	0.0611	0.2102	0.3497	0.3757	7		0.6243	0.2773	0.0671	0.006					0.73	0.89	0.98	1		0.6
0.017	0.2143	0.3993	0.296	0.0763	8		0.9237	0.6306	0.2313	0.017					0.79	0.92	0.99	1		0.7
0.118	0.144	0.188	0.218	0.332	6		0.668	0.45	0.262	0.118		Wen et al.	2017		0.84	0.95	0.99	1		0.8
0.505	0.176	0.166	0.101	0.052	7		0.948	0.847	0.681	0.505					0.86	0.96	0.99	1		0.9
0.681	0.103	0.093	0.085	0.038	8		0.962	0.877	0.784	0.681					0.89	0.97	1	1		1
0	0.03	0.13	0.28	0.56	6		0.44	0.16	0.03	0		Piao, master	2013		0.0111	N/A	0.2725	N/A	0.7164	6	Ming et al.	2017
0.05	0.18	0.26	0.31	0.2	7		0.8	0.49	0.23	0.05					0.0901	N/A	0.5174	N/A	0.3925	7
0.22	0.33	0.32	0.08	0.05	8		0.95	0.87	0.55	0.22					0.3182	N/A	0.5734	N/A	0.1084	8
0.52	0.28	0.17	0.025	0.005	9		0.995	0.97	0.8	0.52					0.6565	N/A	0.3435	N/A	0	9
0.9	0.09	0.01	0	0	10		1	1	0.99	0.9					0.53	0	0.46	0	0.01	8	Shi et al.	2007
0	0.07	0.16	0.27	0.5	6		0.5	0.23	0.07	0					0	0	0.11	0	0.89	6
0.08	0.22	0.23	0.3	0.17	7		0.83	0.53	0.3	0.08					0.59	0	0.41	0	0.01	8
0.26	0.37	0.31	0.05	0.01	8		0.99	0.94	0.63	0.26					0.18	0	0.49	0	0.33	7
0.62	0.31	0.07	0	0	9		1	1	0.93	0.62					0.01	0	0.28	0	0.71	6
0.94	0.06	0	0	0	10		1	1	1	0.94
0	0.05	0.16	0.3	0.49	6		0.51	0.21	0.05	0
0.07	0.21	0.28	0.33	0.11	7		0.89	0.56	0.28	0.07
0.31	0.35	0.26	0.06	0.02	8		0.98	0.92	0.66	0.31
0.55	0.3	0.12	0.03	0	9		1	0.97	0.85	0.55
0.93	0.07	0	0	0	10		1	1	1	0.93
0	0.01	0.08	0.25	0.66	6		0.34	0.09	0.01	0
0	0.04	0.26	0.37	0.33	7		0.67	0.3	0.04	0
0.08	0.23	0.34	0.26	0.09	8		0.91	0.65	0.31	0.08
0.21	0.52	0.18	0.09	0	9		1	0.91	0.73	0.21
0.65	0.26	0.09	0	0	10		1	1	0.91	0.65
0	0.02	0.15	0.28	0.55	6		0.45	0.17	0.02	0		Sun et al.	2012
0.04	0.2	0.25	0.33	0.18	7		0.82	0.49	0.24	0.04
0.2	0.34	0.32	0.1	0.04	8		0.96	0.86	0.54	0.2
0.51	0.28	0.19	0.02	0	9		1	0.98	0.79	0.51
0.89	0.105	0.005	0	0	10		1	1	0.995	0.89
0	0.02	0.12	0.29	0.57	6		0.43	0.14	0.02	0
0.04	0.17	0.25	0.31	0.23	7		0.77	0.46	0.21	0.04
0.19	0.3	0.33	0.1	0.08	8		0.92	0.82	0.49	0.19
0.5	0.27	0.19	0.03	0.01	9		0.99	0.96	0.77	0.5
0.87	0.1	0.03	0	0	10		1	1	0.97	0.87
0	0.02	0.12	0.29	0.57	6		0.43	0.14	0.02	0
0.04	0.17	0.25	0.31	0.23	7		0.77	0.46	0.21	0.04
0.19	0.3	0.33	0.1	0.08	8		0.92	0.82	0.49	0.19
0.5	0.27	0.19	0.03	0.01	9		0.99	0.96	0.77	0.5
0.87	0.1	0.03	0	0	10		1	1	0.97	0.87
0.02	0.16	0.23	0.27	0.33	6		0.67	0.41	0.18	0.02		Chen et al.	1999	analytical using Yin(1995)
0.18	0.2	0.26	0.19	0.17	7		0.83	0.64	0.38	0.18
0.37	0.27	0.17	0.12	0.07	8		0.93	0.81	0.64	0.37
0.74	0.18	0.07	0.01	0	9		1	0.99	0.92	0.74
0.0001	0.0065	0.0695	0.2584	0.6656	6		0.3344	0.0761	0.0066	0.0001		Zhou et al.	2007
0.003	0.0597	0.1971	0.353	0.3871	7		0.6129	0.2598	0.0627	0.003
0.0417	0.1992	0.3784	0.3117	0.0702	8		0.9298	0.6193	0.2409	0.0417
0.15	0.4415	0.263	0.146	0	9		1	0.8545	0.5915	0.15
0	0	0	0.6299	0.3701	6.5		0.6299	0	0	0		Guo	2011	analytical using fuzzy method
0	0	0.1538	0.5905	0.2557	7.5		0.7443	0.1538	0	0
0	0.0701	0.31031	0.3839	0.2357	8.5		0.7643	0.38041	0.0701	0
0	0.1276	0.3754	0.2944	0.2027	9		0.7973	0.503	0.1276	0
0	0.2094	0.3505	0.4401	0	10		1	0.5599	0.2094	0
0.025	0.165	0.225	0.265	0.325	6		0.675	0.415	0.19	0.025		Yin	1996
0.19	0.26	0.2	0.185	0.165	7		0.835	0.65	0.45	0.19
0.375	0.27	0.165	0.12	0.07	8		0.93	0.81	0.645	0.375
0.5	0.25	0.14	0.085	0.025	9		0.975	0.89	0.75	0.5
0.735	0.175	0.075	0.015	0	10		1	0.985	0.91	0.735

## Sheet: brick-wood
collapse	serious damage	medium damage	slight damage	no damage	Intensity		LS1	LS2	LS3	LS4	notes
0	0	0.028	0.136	0.836	6		0.164	0.028	0	0		Chang et al.	2012		0.3534	0.6207			0.0259	8		Zhou et al.	2011
0.142	0.239	0.281	0.259	0.079	8		0.921	0.662	0.381	0.142		Shi et al.	2013		0.0077	N/A	0.2359	N/A	0.7564	6		Ming et al.	2017
0.029	0.077	0.189	0.418	0.287	7		0.713	0.295	0.106	0.029					0.0591	N/A	0.519	N/A	0.4219	7
0.006	0.012	0.053	0.239	0.69	6		0.31	0.071	0.018	0.006					0.2867	N/A	0.6107	N/A	0.1026	8
0.002	0.049	0.085	0.348	0.516	7		0.484	0.136	0.051	0.002		Ge et al.	2014		0.6107	N/A	0.3817	N/A	0.0076	9
0	0.014	0.048	0.141	0.797	6		0.203	0.062	0.014	0					0.0087	0.2407			0.7517	6		He et al.	2016
0.0028	0.0417	0.1353	0.3557	0.4645	6		0.5355	0.1798	0.0445	0.0028		Wu, master	2015		0.0571	0.5303			0.4126	7
0.0483	0.1291	0.2325	0.2804	0.3097	7		0.6903	0.4099	0.1774	0.0483					0.2391	0.6563			0.1046	8
0.1978	0.2586	0.2218	0.1445	0.1773	8		0.8227	0.6782	0.4564	0.1978					0.53	0.47			0	9
0.2	0.5	0.3	0	0	9		1	1	0.7	0.2					0.0236	0.3514			0.625	6		Ye et al.	2017
0	0.009	0.057	0.205	0.729	6		0.271	0.066	0.009	0		Qiu & Gao	2015		0.1098	0.4424			0.4478	7
0.039	0.121	0.241	0.288	0.311	7		0.689	0.401	0.16	0.039					0.3182	0.5847			0.0971	8
0.118	0.36	0.264	0.173	0.085	8		0.915	0.742	0.478	0.118					0.5033	0.4967			0	9
0.438	0.281	0.211	0.056	0.014	9		0.986	0.93	0.719	0.438					77.33	22.67			0	10		Yuan	2008
0.598	0.265	0.163	0.027	0.007	10		0.993	1.026	0.863	0.598					40.84	41.73			17.43	9
0	0	0.053	0.18	0.767	6		0.233	0.053	0	0	single-story	Li et al.	2013		10.65	35.48			53.87	8
0	0.053	0.18	0.66	0.106	7		0.894	0.233	0.053	0					3.68	20.86			75.46	7
0.041	0.173	0.646	0.129	0.011	8		0.989	0.86	0.214	0.041					0.0087	0.2407			0.7517	6		Yang et al.	2017
0.166	0.678	0.135	0.02	0	9		1	0.979	0.844	0.166					0.0571	0.5303			0.4126	7
0.25	0	0.7	0	0.05	8		0.95	0.95	0.25	0.25		Shi et al.	2007		0.2391	0.6563			0.1046	8
0	0	0.18	0	0.82	6		0.18	0.18	0	0					0.53	0.47			0	9
0.55	0	0.4	0	0.05	8		0.95	0.95	0.55	0.55					0.007	0.1649			0.8328	6
0.01	0	0.88	0	0.11	7		0.89	0.89	0.01	0.01					0.007	0.2154			0.7789	7
0	0	0.26	0	0.73	6		0.27	0.26	0	0					0.4261	0.5183			0.0556	8
0.0182	0.0676	0.1505	0.2715	0.49	6		0.51	0.2363	0.0858	0.0182		Wang, master	2007		0.025	0.084	0.29	0.6		0.1	PGA, <0.05g fortification	Fang, book	2011
0.0836	0.2027	0.2207	0.2129	0.28	7		0.72	0.507	0.2863	0.0836					0.122	0.289	0.6	0.86		0.2
0.1828	0.3022	0.2309	0.1633	0.12	8		0.88	0.7159	0.485	0.1828					0.24	0.48	0.77	0.94		0.3
0.3767	0.2608	0.1766	0.1053	0.08	9		0.92	0.8141	0.6375	0.3767					0.36	0.62	0.86	0.97		0.4
0.6384	0.1721	0.1191	0.0481	0.022	10		0.978	0.9296	0.8105	0.6384					0.47	0.71	0.91	0.98		0.5
0	0.055	0.192	0.281	0.472	7		0.528	0.247	0.055	0		Wang	2008		0.56	0.78	0.94	0.99		0.6
0	0.25	0.4	0.25	0.1	8		0.9	0.65	0.25	0					0.63	0.83	0.96	0.99		0.7
0.2	0.5	0.3	0	0	9		1	1	0.7	0.2					0.69	0.87	0.98	0.99		0.8
0.0182	0.0676	0.1505	0.2715	0.49	6		0.51	0.2363	0.0858	0.0182	1-layer dwellig house	He & Fu	2009		0.73	0.9	0.98	0.99		0.9
0.0836	0.2027	0.2207	0.2129	0.28	7		0.72	0.507	0.2863	0.0836					0.78	0.92	0.99	0.99		1
0.1828	0.3022	0.2309	0.1633	0.12	8		0.88	0.7159	0.485	0.1828
0.3767	0.2608	0.1766	0.1053	0.08	9		0.92	0.8141	0.6375	0.3767
0.6384	0.1721	0.1191	0.0481	0.022	10		0.978	0.9296	0.8105	0.6384
0.0813953	0.104651	0.290698	0.232558	0.290698	6		0.709302	0.476744	0.186047	0.0813953	VII fortification	Yang et al.	2017
0.0402	0.0649	0.2816	0.3288	0.4207	7		0.5793	0.3867	0.1051	0.0402
0.16	0.2	0.24	0.2	0.2	8		0.8	0.6	0.36	0.16
0.0128	0.0171	0.0665	0.214	0.7466	6		0.2534	0.0964	0.0299	0.0128	VIII fortification
0.0123	0.0465	0.1797	0.3532	0.4292	7		0.5708	0.2385	0.0588	0.0123
0.0025	0.135	0.365	0.425	0.0725	8		0.9275	0.5025	0.1375	0.0025
0.01	0.022	0.046	0.081	0.841	6		0.159	0.078	0.032	0.01		Wen et al.	2017
0.051	0.095	0.157	0.244	0.453	7		0.547	0.303	0.146	0.051
0.144	0.151	0.176	0.227	0.302	8		0.698	0.471	0.295	0.144
0.01	0.04	0.11	0.26	0.58	6		0.42	0.16	0.05	0.01		Piao, master	2013
0.03	0.07	0.3	0.33	0.27	7		0.73	0.4	0.1	0.03
0.12	0.27	0.37	0.21	0.03	8		0.97	0.76	0.39	0.12
0.3	0.55	0.1	0.05	0	9		1	0.95	0.85	0.3
0.71	0.25	0.04	0	0	10		1	1	0.96	0.71
0	0.01	0.09	0.27	0.63	6		0.37	0.1	0.01	0		Sun et al.	2012
0	0.05	0.29	0.37	0.29	7		0.71	0.34	0.05	0
0.09	0.25	0.36	0.24	0.06	8		0.94	0.7	0.34	0.09
0.23	0.51	0.18	0.08	0	9		1	0.92	0.74	0.23
0.66	0.27	0.07	0	0	10		1	1	0.93	0.66
0	0.01	0.08	0.25	0.66	6		0.34	0.09	0.01	0
0	0.04	0.26	0.37	0.33	7		0.67	0.3	0.04	0
0.08	0.23	0.34	0.26	0.09	8		0.91	0.65	0.31	0.08
0.21	0.52	0.18	0.09	0	9		1	0.91	0.73	0.21
0.65	0.26	0.09	0	0	10		1	1	0.91	0.65
0	0.005	0.085	0.24	0.67	6		0.33	0.09	0.005	0
0	0.03	0.25	0.38	0.34	7		0.66	0.28	0.03	0
0.07	0.24	0.33	0.27	0.09	8		0.91	0.64	0.31	0.07
0.2	0.53	0.17	0.1	0	9		1	0.9	0.73	0.2
0.64	0.26	0.1	0	0	10		1	1	0.9	0.64
0.0002	0.0041	0.0488	0.2251	0.7217	6		0.2783	0.0531	0.0043	0.0002		Zhou et al.	2007
0.0008	0.0322	0.2133	0.3382	0.4154	7		0.5846	0.2463	0.033	0.0008
0.0121	0.1789	0.365	0.3625	0.1392	8		0.8608	0.556	0.191	0.0121
0.13	0.4	0.28	0.19	0	9		1	0.81	0.53	0.13
0.0182	0.0676	0.1505	0.2715	0.49	6		0.51	0.2363	0.0858	0.0182		Yin	1996
0.0836	0.2027	0.2207	0.2129	0.28	7		0.72	0.507	0.2863	0.0836
0.1828	0.3022	0.2309	0.1633	0.12	8		0.88	0.7159	0.485	0.1828
0.3767	0.2608	0.1766	0.1053	0.08	9		0.92	0.8141	0.6375	0.3767
0.6384	0.1721	0.1191	0.0481	0.022	10		0.978	0.9296	0.8105	0.6384

## Sheet: 1_brick-concrete
collapse	serious damage	medium damage	slight damage	no damage			LS1	LS2	LS3	LS4				Group of data	notes
0.0201	0.0844	0.3868	0.3418	0.1669	8		0.8331	0.4913	0.1045	0.0201		Zhou et al.	2011	no fortification
0	0	0	0.677	0.323	6		0.677	0	0	0		Chang et al.	2012	no fortification
0.022	0.048	0.116	0.364	0.45	8		0.55	0.186	0.07	0.022		Shi et al.	2013	no fortification
0.012	0.051	0.142	0.277	0.518	7		0.482	0.205	0.063	0.012
0	0	0.007	0.037	0.956	6		0.044	0.007	0	0
0	0	0.021	0.304	0.675	7		0.325	0.021	0	0		Ge et al.	2014	no fortification
0	0	0.006	0.105	0.889	6		0.111	0.006	0	0
0.0002	0.0029	0.0221	0.1933	0.7815	6		0.2185	0.0252	0.0031	0.0002		Ming et al.	2017	no fortification
0.0039	0.0421	0.137	0.3302	0.4868	7		0.5132	0.183	0.046	0.0039
0.0371	0.1359	0.3072	0.3339	0.1859	8		0.8141	0.4802	0.173	0.0371
0.1711	0.3367	0.2496	0.1321	0.1105	9		0.8895	0.7574	0.5078	0.1711
0.0003	0.0032	0.0252	0.1942	0.7808	6		0.2192	0.0287	0.0035	0.0003		He et al.	2016	no fortification
0.0044	0.0505	0.138	0.3283	0.4849	7		0.5151	0.1929	0.0549	0.0044
0.0242	0.1279	0.3145	0.3547	0.1805	8		0.8195	0.4666	0.1521	0.0242
0.11	0.3815	0.145	0.1805	0.183	9		0.817	0.6365	0.4915	0.11
0.67	0.3	0.03	0	0	10		1	1	0.97	0.67
0	0	0.06	0.11	0.83	6		0.17	0.06	0	0		Chen et al.	2017	no fortification
0	0	0.09	0.15	0.76	7		0.24	0.09	0	0
0	0	0.06	0.11	0.83	6		0.17	0.06	0	0
0	0	0.16	0.32	0.52	7		0.48	0.16	0	0
0	0.06	0.12	0.44	0.38	8		0.62	0.18	0.06	0
0	0.007	0.039	0.199	0.755	6		0.245	0.046	0.007	0		Qiu & Gao	2015	no fortification
0.031	0.119	0.231	0.278	0.341	7		0.659	0.381	0.15	0.031
0.109	0.359	0.254	0.163	0.115	8		0.885	0.722	0.468	0.109
0.437	0.28	0.21	0.055	0.018	9		0.982	0.927	0.717	0.437
0.597	0.264	0.102	0.026	0.011	10		0.989	0.963	0.861	0.597
0	0.6667	0	0.3333	0	6		1	0.6667	0.6667	0	unfortificated masonry	Sun & Zhang	2012	no fortification
0.0189	0.117	0.2528	0.3245	0.2868	7		0.7132	0.3887	0.1359	0.0189
0.1012	0.3452	0.2083	0.25	0.0952	8		0.9048	0.6547	0.4464	0.1012
0.1088	0.5649	0.1925	0.0711	0.0628	9		0.9372	0.8662	0.6737	0.1088
0.2549	0.3137	0.1373	0.1961	0.098	10		0.902	0.7059	0.5686	0.2549
0.4203	0.3188	0.087	0.1014	0.0725	11		0.9275	0.8261	0.7391	0.4203
0	0.2	0.6	0	0.2	6		0.8	0.8	0.2	0	fortificated masonry			unspecified fortification
0.0046	0.0456	0.1626	0.3526	0.4347	7		0.5653	0.2128	0.0502	0.0046
0.0139	0.2282	0.2787	0.2578	0.2213	8		0.7787	0.5208	0.2421	0.0139
0.0868	0.3529	0.2997	0.1625	0.098	9		0.902	0.7394	0.4397	0.0868
0.0345	0.1379	0.2529	0.2529	0.3218	10		0.6782	0.4253	0.1724	0.0345
0.013	0.3421	0.0921	0.2237	0.3291	11		0.6709	0.4472	0.3551	0.013
0.013	0.0514	0.1295	0.3032	0.5129	6		0.4871	0.1939	0.0644	0.013	masonry	Li et al.	2013	no fortification
0.0547	0.1163	0.1764	0.253	0.4016	7		0.5984	0.3474	0.171	0.0547
0.1291	0.1985	0.2211	0.2084	0.2429	8		0.7571	0.5487	0.3276	0.1291
0.2586	0.2768	0.21	0.1482	0.1064	9		0.8936	0.7454	0.5354	0.2586
0	0	0.02	0.14	0.84	6		0.16	0.02	0	0		Wei et al.	2008	no fortification
0	0.01	0.05	0.66	0.28	7		0.72	0.06	0.01	0
0.01	0.044	0.62	0.28	0.046	8		0.954	0.674	0.054	0.01
0.07	0.6	0.27	0.05	0.01	9		0.99	0.94	0.67	0.07
0.53	0.38	0.09	0	0	10		1	1	0.91	0.53
0.02	0.12	0.21	0.42	0.23	8		0.77	0.35	0.14	0.02		Shi et al.	2007	no fortification
0	0	0	0.07	0.93	6		0.07	0	0	0
0.02	0.33	0.37	0.2	0.08	8		0.92	0.72	0.35	0.02
0	0	0.18	0.65	0.17	7		0.83	0.18	0	0
0	0	0	0.26	0.74	6		0.26	0	0	0
0.0017	0.0136	0.0542	0.2608	0.6697	6		0.3303	0.0695	0.0153	0.0017		Wang, master	2007	unspecified fortification
0.0096	0.036	0.0897	0.2311	0.6337	7		0.3663	0.1353	0.0456	0.0096
0.031	0.0825	0.1627	0.2412	0.4825	8		0.5175	0.2762	0.1135	0.031
0.089	0.1608	0.2339	0.2297	0.2867	9		0.7133	0.4837	0.2498	0.089
0.2506	0.2805	0.2443	0.1404	0.0842	10		0.9158	0.7754	0.5311	0.2506
0.0027	0.021	0.0761	0.2923	0.6079	6		0.3921	0.0998	0.0237	0.0027	masonry with VI fortification	Hu et al.	2007	low fortification
0.0155	0.0569	0.1301	0.2711	0.5264	7		0.4736	0.2025	0.0724	0.0155
0.0501	0.1274	0.2189	0.2621	0.3416	8		0.6584	0.3964	0.1775	0.0501
0.1391	0.2322	0.2667	0.2107	0.1512	9		0.8488	0.638	0.3713	0.1391
0.363	0.1391	0.2038	0.0773	0.0243	10		0.9757	0.7059	0.5021	0.363
0.2932	0.1877	0.4495	0.0649	0.0047	10		0.9953	0.9304	0.4809	0.2932		Yuan	2008	no fortification
0.1081	0.2189	0.2373	0.1926	0.2431	9		0.7569	0.5643	0.327	0.1081
0.0295	0.0537	0.264	0.1058	0.547	8		0.453	0.3472	0.0832	0.0295
0.0091	0.0194	0.0432	0.1028	0.8255	7		0.1745	0.0717	0.0285	0.0091
0	0.037	0.076	0.302	0.585	7		0.415	0.113	0.037	0		Wang	2008	no fortification
0.005	0.12	0.275	0.345	0.255	8		0.745	0.4	0.125	0.005
0.021	0.348	0.206	0.17	0.255	9		0.745	0.575	0.369	0.021
0	0.0124	0.3003	0.3568	0.3305	6		0.6695	0.3127	0.0124	0		Meng et al.	2012	no fortification	analytical using Yin(1995)
0	0.0659	0.5706	0.192	0.1715	7		0.8285	0.6365	0.0659	0
0.0125	0.5125	0.3122	0.1234	0.0394	8		0.9606	0.8372	0.525	0.0125
0.0443	0.6582	0.1989	0.0986	0	9		1	0.9014	0.7025	0.0443
0.2831	0.5414	0.1755	0	0	10		1	1	0.8245	0.2831
0.0027	0.021	0.0761	0.2923	0.6079	6		0.3921	0.0998	0.0237	0.0027	VI fortification	He & Fu	2009	low fortification
0.0155	0.0569	0.1301	0.2711	0.5264	7		0.4736	0.2025	0.0724	0.0155
0.0501	0.1274	0.2189	0.2621	0.3416	8		0.6584	0.3964	0.1775	0.0501
0.1391	0.2322	0.2667	0.2107	0.1512	9		0.8488	0.638	0.3713	0.1391
0.363	0.3315	0.2038	0.0773	0.0243	10		0.9757	0.8983	0.6945	0.363
0.0017	0.0136	0.0542	0.2608	0.6697	6		0.3303	0.0695	0.0153	0.0017	VII fortification			middle fortification
0.0096	0.036	0.0897	0.2311	0.6337	7		0.3663	0.1353	0.0456	0.0096
0.031	0.0825	0.1627	0.2412	0.4825	8		0.5175	0.2762	0.1135	0.031
0.089	0.1608	0.2339	0.2297	0.2867	9		0.7133	0.4837	0.2498	0.089
0.2506	0.2805	0.2443	0.1404	0.0842	10		0.9158	0.7754	0.5311	0.2506
0.0012	0.0087	0.0356	0.2098	0.7448	6		0.2552	0.0455	0.0099	0.0012	VIII fortification			high fortification
0.0064	0.0223	0.0562	0.1717	0.7434	7		0.2566	0.0849	0.0287	0.0064
0.0196	0.0501	0.1049	0.1855	0.6399	8		0.3601	0.1746	0.0697	0.0196
0.0546	0.0992	0.1679	0.1987	0.4796	9		0.5204	0.3217	0.1538	0.0546
0.1568	0.1966	0.2249	0.1858	0.2359	10		0.7641	0.5783	0.3534	0.1568
0.0182	0.0676	0.1505	0.2715	0.49	6		0.51	0.2363	0.0858	0.0182	No fortification			no fortification
0.0836	0.2027	0.2207	0.2129	0.28	7		0.72	0.507	0.2863	0.0836
0.1828	0.3022	0.2309	0.1633	0.12	8		0.88	0.7159	0.485	0.1828
0.3767	0.2608	0.1766	0.1053	0.08	9		0.92	0.8141	0.6375	0.3767
0.6384	0.1721	0.1191	0.0481	0.022	10		0.978	0.9296	0.8105	0.6384
0.0003	0.0032	0.0252	0.1942	0.7808	6		0.2192	0.0287	0.0035	0.0003		Yang et al.	2017	no fortification
0.0044	0.0505	0.138	0.3283	0.4849	7		0.5151	0.1929	0.0549	0.0044
0.0242	0.1279	0.3145	0.3547	0.1805	8		0.8195	0.4666	0.1521	0.0242
0.11	0.3815	0.145	0.1805	0.183	9		0.817	0.6365	0.4915	0.11
0.67	0.3	0.03	0	0	10		1	1	0.97	0.67
0	0.0072	0.0187	0.1329	0.85	6		0.15	0.0259	0.0072	0
0	0.0006	0.0132	0.1987	0.7877	7		0.2123	0.0138	0.0006	0
0.0591	0.139	0.2161	0.3664	0.2194	8		0.7806	0.4142	0.1981	0.0591
0.0054	0.019	0.0518	0.2176	0.7615	6		0.2385	0.0762	0.0244	0.0054	VII fortification			middle fortification
0.0123	0.0753	0.1407	0.32	0.479	7		0.521	0.2283	0.0876	0.0123
0.0406	0.1422	0.32	0.3457	0.1963	8		0.8037	0.5028	0.1828	0.0406
0.0014	0.0091	0.0392	0.1945	0.7932	6		0.2068	0.0497	0.0105	0.0014	VIII fortification			high fortification
0.0184	0.0232	0.155	0.2846	0.5457	7		0.4543	0.1966	0.0416	0.0184
0.022	0.087	0.364	0.337	0.19	8		0.81	0.473	0.109	0.022
0	0	0	0.084	0.916	6		0.084	0	0	0	EQ-housing project	Wen et al.	2017	unused…
0	0	0.047	0.26	0.693	7		0.307	0.047	0	0
0	0.018	0.116	0.52	0.346	8		0.654	0.134	0.018	0
0	0.001	0.034	0.072	0.893	6		0.107	0.035	0.001	0				no fortification
0	0.001	0.031	0.354	0.614	7		0.386	0.032	0.001	0
0	0.044	0.113	0.381	0.462	8		0.538	0.157	0.044	0
0	0	0	0.143	0.857	6		0.143	0	0	0	masonry	Piao, master	2013	no fortification
0	0	0.01	0.32	0.671	7		0.329	0.01	0	0
0	0	0.516	0.241	0.242	8		0.758	0.516	0	0
0.111	0.244	0.489	0.111	0.045	9		0.955	0.844	0.355	0.111
0.6	0.4	0	0	0	10		1	1	1	0.6
0	0.01	0.03	0.18	0.78	6		0.22	0.04	0.01	0				no fortification
0.01	0.05	0.15	0.33	0.46	7		0.54	0.21	0.06	0.01
0.06	0.21	0.35	0.28	0.1	8		0.9	0.62	0.27	0.06
0.17	0.52	0.2	0.08	0.03	9		0.97	0.89	0.69	0.17
0.52	0.38	0.09	0.01	0	10		1	0.99	0.9	0.52
0	0.02	0.08	0.18	0.72	6		0.28	0.1	0.02	0
0.04	0.09	0.21	0.27	0.39	7		0.61	0.34	0.13	0.04
0.1	0.28	0.33	0.22	0.07	8		0.93	0.71	0.38	0.1
0.22	0.54	0.14	0.09	0.01	9		0.99	0.9	0.76	0.22
0.56	0.39	0.05	0	0	10		1	1	0.95	0.56
0	0	0.005	0.125	0.87	6		0.13	0.005	0	0	high fortification			high fortification
0	0.005	0.09	0.225	0.68	7		0.32	0.095	0.005	0
0.01	0.06	0.25	0.38	0.3	8		0.7	0.32	0.07	0.01
0.05	0.33	0.28	0.22	0.12	9		0.88	0.66	0.38	0.05
0.27	0.55	0.12	0.04	0.02	10		0.98	0.94	0.82	0.27
0	0	0.01	0.14	0.85	6		0.15	0.01	0	0	low fortification			low fortification
0	0.01	0.13	0.36	0.5	7		0.5	0.14	0.01	0
0.02	0.09	0.3	0.37	0.22	8		0.78	0.41	0.11	0.02
0.13	0.42	0.24	0.13	0.08	9		0.92	0.79	0.55	0.13
0.35	0.5	0.11	0.03	0.01	10		0.99	0.96	0.85	0.35
0	0	0.005	0.125	0.87	6		0.13	0.005	0	0	VIII, IX high fortification	Sun et al.	2014	high fortification
0	0.005	0.09	0.225	0.68	7		0.32	0.095	0.005	0
0.01	0.06	0.25	0.38	0.3	8		0.7	0.32	0.07	0.01
0.05	0.33	0.28	0.22	0.12	9		0.88	0.66	0.38	0.05
0.27	0.55	0.12	0.04	0.02	10		0.98	0.94	0.82	0.27
0	0	0.01	0.14	0.85	6		0.15	0.01	0	0	VI, VII middle fortification			low-middle fortification
0	0.01	0.13	0.36	0.5	7		0.5	0.14	0.01	0
0.02	0.09	0.3	0.37	0.22	8		0.78	0.41	0.11	0.02
0.13	0.42	0.24	0.13	0.08	9		0.92	0.79	0.55	0.13
0.35	0.5	0.11	0.03	0.01	10		0.99	0.96	0.85	0.35
0	0	0.01	0.22	0.77	6		0.23	0.01	0	0	No fortification			no fortification
0	0.04	0.16	0.29	0.51	7		0.49	0.2	0.04	0
0.06	0.2	0.36	0.25	0.13	8		0.87	0.62	0.26	0.06
0.15	0.52	0.2	0.09	0.04	9		0.96	0.87	0.67	0.15
0.51	0.4	0.09	0	0	10		1	1	0.91	0.51
0.01	0.03	0.15	0.32	0.49	6		0.51	0.19	0.04	0.01	old dwelling houses	Chen et al.	1999	high fortification	analytical using Yin(1995)
0.05	0.1	0.22	0.35	0.28	7		0.72	0.37	0.15	0.05
0.18	0.3	0.23	0.17	0.12	8		0.88	0.71	0.48	0.18
0.64	0.17	0.12	0.05	0.02	9		0.98	0.93	0.81	0.64
0	0.0031	0.0437	0.0884	0.8648	6		0.1352	0.0468	0.0031	0		Ma & Chang	1999	high fortification	analytical using Yin(1995)
0.019	0.1192	0.3283	0.349	0.1845	7		0.8155	0.4665	0.1382	0.019
0.0928	0.3517	0.3829	0.1256	0.0416	8		0.9584	0.8274	0.4445	0.0928
0.3118	0.4786	0.1951	0.0145	0	9		1	0.9855	0.7904	0.3118
0	0	0.03	0.17	0.8	6		0.2	0.03	0	0		He & Kang	1999	high fortification	analytical using Yin(1995)
0	0.01	0.56	0.33	0.1	7		0.9	0.57	0.01	0
0.04	0.47	0.46	0.03	0	8		1	0.97	0.51	0.04
0.48	0.48	0.04	0	0	9		1	1	0.96	0.48
0.93	0.07	0	0	0	10		1	1	1	0.93
0	0‭	0.15	0.28‭	0.57	6		0.43	0.15	0	0	VI fortification	Zhang and Xie	2004	low fortification	for common building types in the city
0	‬0.15‭	‬0.28‭	‬0.37‭	0.2	7		0.8	0	0	0
‬0.15‭	‬0.28‭	‬0.37‭	‬0.15‭	0.05	8		0.95	0	0	‬0.15‭
‬0.28‭	‬0.37‭	‬0.30‭	‬0.05‭	0	9		1	0	0	‬0.28‭
‬0.37	‬0.30	‬0.33	‬0	0	10		1	0	0	‬0.37
0	0‭	0‭	0.15‭	0.85	6		0.15	0	0	0	VII fortification			middle fortification
0	‬0‭	‬0. 15‭	‬0.28‭	0.57	7		0.43	0	0	0
0‭	‬0.15	‬0.28‭	‬0.37‭	0.2	8		0.8	0	0	0‭
0. 15‭	0.28‭	‬0.37‭	‬0.15‭	0.05	9		0.95	0	0	0. 15‭
0.28	‬0.37	‬0.30	‬0.05	0	10		1	0.28	0.28	0.28
0	0	0	0‭	1	6		0	0	0	0	VIII fortification			high fortification
0	0	0‭	‬0. 15‭	0.85	7		0.15	0	0	0
0	0‭	0.15‭	‬0.28‭	0.57	8		0.43	0	0	0
0‭	0. 15‭	‬0.28‭	‬0.37‭	0.2	9		0.8	0	0	0‭
0. 15	0.28	‬0.37	‬0. 15	0.05	10		0.95	0.28	0.28	0. 15
0	0	0	0‭	1	6		0	0	0	0	IX fortification			high fortification
0	0	0	0‭	1	7		0	0	0	0
0	0	0‭	0. 15	0.85	8		0.15	0	0	0
0	0‭	0. 15‭	0. 28‭	0.57	9		0.43	0	0	0
0	0. 15	‬0.28	0. 37	0.2	10		0.8	0	0	0
0	0.0017	0.0336	0.2146	0.7496	6		0.2504	0.0353	0.0017	0		Zhou et al.	2007	no fortification
0.0016	0.0523	0.1413	0.3017	0.503	7		0.497	0.1952	0.0539	0.0016
0.0085	0.1176	0.3835	0.3292	0.1945	8		0.8055	0.5096	0.1261	0.0085
0.11	0.381	0.145	0.1805	0.183	9		0.817	0.636	0.491	0.11
0	0	0.01	0.073	0.917	6		0.083	0.01	0	0	X fortification	Bie et al.	2010	high fortification
0	0.004	0.073	0.385	0.538	7		0.462	0.077	0.004	0
0.003	0.21	0.163	0.296	0.328	8		0.672	0.376	0.213	0.003
0.051	0.302	0.228	0.208	0.211	9		0.789	0.581	0.353	0.051
0.365	0.357	0.18	0.066	0.032	10		0.968	0.902	0.722	0.365
0	0.002	0.014	0.114	0.87	6		0.13	0.016	0.002	0
0.006	0.109	0.115	0.369	0.401	7		0.599	0.23	0.115	0.006
0.144	0.219	0.169	0.273	0.195	8		0.805	0.532	0.363	0.144
0.372	0.18	0.24	0.16	0.048	9		0.952	0.792	0.552	0.372
0.527	0.244	0.132	0.071	0.026	10		0.974	0.903	0.771	0.527
0	0.005	0.015	0.118	0.862	6		0.138	0.02	0.005	0	IX fortification			high fortification
0.005	0.049	0.108	0.335	0.503	7		0.497	0.162	0.054	0.005
0.018	0.245	0.213	0.251	0.273	8		0.727	0.476	0.263	0.018
0.086	0.352	0.218	0.173	0.171	9		0.829	0.656	0.438	0.086
0.425	0.352	0.14	0.056	0.027	10		0.973	0.917	0.777	0.425
0	0.007	0.024	0.154	0.815	6		0.185	0.031	0.007	0
0.031	0.129	0.175	0.309	0.356	7		0.644	0.335	0.16	0.031
0.154	0.258	0.215	0.218	0.155	8		0.845	0.627	0.412	0.154
0.392	0.235	0.21	0.125	0.038	9		0.962	0.837	0.627	0.392
0.577	0.229	0.117	0.056	0.021	10		0.979	0.923	0.806	0.577
0	0.01	0.02	0.163	0.807	6		0.193	0.03	0.01	0	VIII fortification			high fortification
0.01	0.094	0.143	0.285	0.468	7		0.532	0.247	0.104	0.01
0.033	0.28	0.263	0.206	0.218	8		0.782	0.576	0.313	0.033
0.121	0.402	0.208	0.138	0.131	9		0.869	0.731	0.523	0.121
0.485	0.347	0.1	0.046	0.022	10		0.978	0.932	0.832	0.485
0	0.012	0.034	0.194	0.76	6		0.24	0.046	0.012	0
0.056	0.149	0.235	0.249	0.311	7		0.689	0.44	0.205	0.056
0.164	0.299	0.259	0.163	0.115	8		0.885	0.722	0.463	0.164
0.412	0.29	0.18	0.09	0.028	9		0.972	0.882	0.702	0.412
0.627	0.214	0.102	0.041	0.016	10		0.984	0.943	0.841	0.627
0	0.015	0.025	0.208	0.752	6		0.248	0.04	0.015	0	VII fortification			middle fortification
0.015	0.139	0.178	0.235	0.433	7		0.567	0.332	0.154	0.015
0.048	0.315	0.313	0.161	0.163	8		0.837	0.676	0.363	0.048
0.156	0.452	0.198	0.103	0.091	9		0.909	0.806	0.608	0.156
0.545	0.342	0.06	0.036	0.017	10		0.983	0.947	0.887	0.545
0	0.017	0.044	0.234	0.705	6		0.295	0.061	0.017	0
0.081	0.169	0.295	0.189	0.266	7		0.734	0.545	0.25	0.081
0.174	0.339	0.304	0.108	0.075	8		0.925	0.817	0.513	0.174
0.432	0.345	0.15	0.055	0.018	9		0.982	0.927	0.777	0.432
0.677	0.199	0.087	0.026	0.011	10		0.989	0.963	0.876	0.677
0	0.02	0.03	0.253	0.697	6		0.303	0.05	0.02	0	VI fortification			low fortification
0.02	0.184	0.213	0.185	0.398	7		0.602	0.417	0.204	0.02
0.063	0.35	0.363	0.116	0.108	8		0.892	0.776	0.413	0.063
0.191	0.502	0.188	0.068	0.051	9		0.949	0.881	0.693	0.191
0.605	0.337	0.02	0.026	0.012	10		0.988	0.962	0.942	0.605
0	0.022	0.054	0.274	0.65	6		0.35	0.076	0.022	0
0.106	0.189	0.355	0.129	0.221	7		0.779	0.65	0.295	0.106
0.184	0.379	0.349	0.053	0.035	8		0.965	0.912	0.563	0.184
0.452	0.4	0.12	0.02	0.008	9		0.992	0.972	0.852	0.452
0.727	0.184	0.072	0.011	0.006	10		0.994	0.983	0.911	0.727
0.0014	0.0133	0.0577	0.2756	0.652	6		0.348	0.0724	0.0147	0.0014	VI fortification	Xia, master	2009	low fortification	analytical using Yin (1995)
0.0082	0.036	0.0977	0.2527	0.6055	7		0.3945	0.1419	0.0442	0.0082
0.0291	0.0875	0.184	0.2645	0.4349	8		0.5651	0.3006	0.1166	0.0291
0.0915	0.1794	0.2633	0.2415	0.2245	9		0.7755	0.5342	0.2709	0.0915
0.2731	0.3164	0.2488	0.116	0.0457	10		0.9543	0.8383	0.5895	0.2731
0.001	0.0166	0.0652	0.2836	0.6321	6		0.3679	0.0828	0.0176	0.001
0.0112	0.0449	0.1122	0.262	0.5697	7		0.4303	0.1683	0.0561	0.0112
0.0379	0.105	0.2006	0.2648	0.3917	8		0.6083	0.3435	0.1429	0.0379
0.1121	0.2036	0.2666	0.2284	0.1893	9		0.8107	0.5823	0.3157	0.1121
0.3133	0.3251	0.2289	0.0976	0.035	10		0.965	0.8673	0.6384	0.3133
0.0027	0.021	0.0761	0.2923	0.6079	6		0.3921	0.0998	0.0237	0.0027
0.0155	0.0569	0.1301	0.2711	0.5264	7		0.4736	0.2025	0.0724	0.0155
0.0501	0.1274	0.2189	0.2621	0.3416	8		0.6584	0.3964	0.1775	0.0501
0.1391	0.2322	0.2667	0.2107	0.1512	9		0.8488	0.638	0.3713	0.1391
0.363	0.3315	0.2038	0.0773	0.0243	10		0.9757	0.8983	0.6945	0.363
0.0009	0.0088	0.0409	0.24	0.7093	6		0.2907	0.0506	0.0097	0.0009	VII fortification			middle fortification
0.0054	0.0232	0.0662	0.206	0.6992	7		0.3008	0.0948	0.0286	0.0054
0.0186	0.0565	0.1304	0.2256	0.5689	8		0.4311	0.2055	0.0751	0.0186
0.0588	0.1202	0.2114	0.2347	0.3747	9		0.6253	0.3904	0.179	0.0588
0.1846	0.2477	0.2602	0.1762	0.1313	10		0.8687	0.6925	0.4323	0.1846
0.0012	0.0106	0.0462	0.2491	0.6929	6		0.3071	0.058	0.0118	0.0012
0.0069	0.028	0.0756	0.2171	0.6724	7		0.3276	0.1105	0.0349	0.0069
0.0232	0.0667	0.144	0.2333	0.5328	8		0.4672	0.2339	0.0899	0.0232
0.0704	0.1367	0.2222	0.2341	0.3365	9		0.6635	0.4293	0.2071	0.0704
0.211	0.2627	0.2553	0.1614	0.1096	10		0.8904	0.729	0.4737	0.211
0.0017	0.0136	0.0542	0.2608	0.6697	6		0.3303	0.0695	0.0153	0.0017
0.0096	0.036	0.0897	0.2311	0.6337	7		0.3663	0.1353	0.0456	0.0096
0.031	0.0825	0.1627	0.2412	0.4825	8		0.5175	0.2762	0.1135	0.031
0.089	0.1608	0.2339	0.2297	0.2867	9		0.7133	0.4837	0.2498	0.089
0.2506	0.2805	0.2443	0.1404	0.0842	10		0.9158	0.7754	0.5311	0.2506
0.0007	0.0057	0.0265	0.1862	0.781	6		0.219	0.0329	0.0064	0.0007	VIII fortification			high fortification
0.0037	0.0145	0.0409	0.1467	0.7942	7		0.2058	0.0591	0.0182	0.0037
0.0121	0.0342	0.0812	0.1629	0.7096	8		0.2904	0.1275	0.0463	0.0121
0.0362	0.0726	0.1422	0.1847	0.5643	9		0.4357	0.251	0.1088	0.0362
0.1133	0.1634	0.2142	0.1994	0.6097	10		0.3903	0.4909	0.2767	0.1133
0.0008	0.0067	0.0298	0.1954	0.7673	6		0.2327	0.0373	0.0075	0.0008
0.0046	0.0172	0.0464	0.1564	0.7754	7		0.2246	0.0682	0.0218	0.0046
0.0146	0.0398	0.09	0.1721	0.6835	8		0.3165	0.1444	0.0544	0.0146
0.0426	0.0822	0.1524	0.191	0.5318	9		0.4682	0.2772	0.1248	0.0426
0.1289	0.1764	0.2195	0.1952	0.28	10		0.72	0.5248	0.3053	0.1289
0.0012	0.0087	0.0356	0.2098	0.7448	6		0.2552	0.0455	0.0099	0.0012
0.0064	0.0223	0.0562	0.1717	0.7434	7		0.2566	0.0849	0.0287	0.0064
0.0196	0.0501	0.1049	0.1855	0.6399	8		0.3601	0.1746	0.0697	0.0196
0.0546	0.0992	0.1679	0.1987	0.4796	9		0.5204	0.3217	0.1538	0.0546
0.1568	0.1966	0.2249	0.1858	0.2359	10		0.7641	0.5783	0.3534	0.1568
0.0002	0.0018	0.0119	0.1275	0.8587	6		0.1413	0.0139	0.002	0.0002	IX fortification			high fortification
0.0009	0.0045	0.0166	0.0895	0.8889	7		0.1111	0.022	0.0054	0.0009
0.0033	0.0117	0.0374	0.1025	0.8452	8		0.1548	0.0524	0.015	0.0033
0.0116	0.029	0.0799	0.1301	0.7494	9		0.2506	0.1205	0.0406	0.0116
0.0449	0.0881	0.158	0.1942	0.5149	10		0.4851	0.291	0.133	0.0449
0.0002	0.0021	0.0134	0.1358	0.8485	6		0.1515	0.0157	0.0023	0.0002
0.0011	0.0053	0.019	0.0966	0.8781	7		0.1219	0.0254	0.0064	0.0011
0.0039	0.0137	0.0421	0.1109	0.8294	8		0.1706	0.0597	0.0176	0.0039
0.0137	0.0332	0.088	0.1391	0.726	9		0.274	0.1349	0.0469	0.0137
0.0514	0.0975	0.1681	0.199	0.484	10		0.516	0.317	0.1489	0.0514
0.0002	0.0027	0.0156	0.1466	0.8349	6		0.1651	0.0185	0.0029	0.0002
0.0014	0.0066	0.0227	0.1068	0.8625	7		0.1375	0.0307	0.008	0.0014
0.005	0.0169	0.0492	0.1221	0.8068	8		0.1932	0.0711	0.0219	0.005
0.0171	0.0399	0.0991	0.1502	0.6937	9		0.3063	0.1561	0.057	0.0171
0.0618	0.1107	0.1801	0.2025	0.445	10		0.555	0.3526	0.1725	0.0618
0	0	0.043	0.163	0.794	6		0.206	0.043	0	0		Cui & Zhai	2015	no fortification	Yin (1995)
0	0.026	0.147	0.428	0.399	7		0.601	0.173	0.026	0
0.009	0.107	0.389	0.349	0.146	8		0.854	0.505	0.116	0.009
0	0	0.057	0.274	0.669	6		0.331	0.057	0	0	VII fortification, built before 1978	Zhang & Sun	2010	low fortification	self-developed method for mass building damage prediction by Zhang & Sun (2010)
0	0.047	0.197	0.615	0.141	7		0.859	0.244	0.047	0
0.039	0.198	0.615	0.109	0.039	8		0.961	0.852	0.237	0.039
0.212	0.638	0.113	0.037	0	9		1	0.963	0.85	0.212
0.772	0.192	0.036	0	0	10		1	1	0.964	0.772
0	0	0.022	0	0.978	6		0.022	0.022	0	0	VII fortification, 1-storey			low fortification
0	0.022	0	0.323	0.655	7		0.345	0.022	0.022	0
0.022	0	0.323	0.519	0.136	8		0.864	0.345	0.022	0.022
0.022	0.323	0.519	0.136	0	9		1	0.864	0.345	0.022
0.022	0.842	0.136	0	0	10		1	1	0.864	0.022
0	0	0.019	0.223	0.757	6		0.243	0.019	0	0	VII fortification, usage for living			low-middle fortification
0	0.014	0.139	0.679	0.168	7		0.832	0.153	0.014	0
0.013	0.118	0.683	0.159	0.028	8		0.972	0.814	0.131	0.013
0.128	0.662	0.185	0.025	0	9		1	0.975	0.79	0.128
0.692	0.265	0.042	0	0	10		1	0.999	0.957	0.692
0	0	0.019	0.193	0.788	6		0.212	0.019	0	0	simulated damage ratio in part of Xiamen			low-middle fortification
0	0.012	0.122	0.656	0.21	7		0.79	0.134	0.012	0
0.012	0.099	0.667	0.176	0.046	8		0.954	0.778	0.111	0.012
0.108	0.639	0.208	0.045	0	9		1	0.955	0.747	0.108
0.653	0.271	0.076	0	0	10		1	1	0.924	0.653
0	0	0	0.113	0.887	6		0.113	0	0	0	actual damage ratio in part of Xiamen			low-middle fortification
0	0	0.039	0.706	0.256	7		0.744	0.039	0	0
0	0.026	0.689	0.242	0.043	8		0.957	0.715	0.026	0
0.026	0.73	0.198	0.039	0.007	9		0.993	0.954	0.756	0.026
0.681	0.292	0.027	0	0	10		1	1	0.973	0.681
0	0	0	0	1	6		0	0	0	0	low-storey used as living, built in 1979-1989	Hu & Sun	2010	no fortification	use the method in Zhang & Sun (2010)
0	0	0	0.206	0.794	7		0.206	0	0	0
0	0	0.206	0.476	0.318	8		0.682	0.206	0	0
0	0.206	0.476	0.312	0.006	9		0.994	0.682	0.206	0
0.227	0.514	0.253	0.006	0	10		1	0.994	0.741	0.227
0	0	0	0.013	0.987	6		0.013	0	0	0	low-storey used as non-living, built in 1979-1989			no fortification
0	0	0.012	0.159	0.829	7		0.171	0.012	0	0
0	0.023	0.182	0.668	0.127	8		0.873	0.205	0.023	0
0.023	0.26	0.605	0.112	0	9		1	0.888	0.283	0.023
0.38	0.524	0.096	0	0	10		1	1	0.904	0.38
0	0	0	0.003	0.997	6		0.003	0	0	0	mid-storey used as living, built in 1990-2000			low-middle fortification
0	0	0.003	0.017	0.98	7		0.02	0.003	0	0
0	0.005	0.032	0.462	0.501	8		0.499	0.037	0.005	0
0.005	0.058	0.421	0.507	0.009	9		0.991	0.484	0.063	0.005
0.118	0.692	0.18	0.01	0	10		1	0.99	0.81	0.118
0	0	0.003	0.001	0.996	6		0.004	0.003	0	0	mid-storey used as non-living, built in 1990-2000			low-middle fortification
0	0	0.003	0.134	0.863	7		0.137	0.003	0	0
0	0.007	0.179	0.649	0.165	8		0.835	0.186	0.007	0
0.001	0.233	0.58	0.183	0.003	9		0.997	0.814	0.234	0.001
0.302	0.613	0.082	0.003	0	10		1	0.997	0.915	0.302
0	0	0	0	1	6		0	0	0	0	mid-storey used as living, built after 2001			high fortification
0	0	0	0.061	0.939	7		0.061	0	0	0
0	0	0	0.66	0.34	8		0.66	0	0	0
0	0	0.418	0.515	0.067	9		0.933	0.418	0	0
0	0.433	0.5	0.067	0	10		1	0.933	0.433	0
0	0	0	0	1	6		0	0	0	0	mid-storey used as non-living, built after 2001			high fortification
0	0	0	0.35	0.65	7		0.35	0	0	0
0	0	0.184	0.581	0.235	8		0.765	0.184	0	0
0	0.184	0.561	0.255	0	9		1	0.745	0.184	0
0.107	0.426	0.467	0	0	10		1	1	0.533	0.107
0.0009	0.0088	0.0409	0.24	0.7093	6		0.2907	0.0506	0.0097	0.0009	VII fortification	Yin	1996	middle fortification
0.0054	0.0232	0.0662	0.206	0.6992	7		0.3008	0.0948	0.0286	0.0054
0.0186	0.0565	0.1304	0.2256	0.5689	8		0.4311	0.2055	0.0751	0.0186
0.0588	0.1202	0.2116	0.2347	0.3747	9		0.6253	0.3906	0.179	0.0588
0.1846	0.2477	0.2602	0.1762	0.1313	10		0.8687	0.6925	0.4323	0.1846
0.0012	0.0106	0.0462	0.2491	0.6929	6		0.3071	0.058	0.0118	0.0012
0.0069	0.028	0.0756	0.2171	0.6724	7		0.3276	0.1105	0.0349	0.0069
0.0232	0.0667	0.144	0.2333	0.5328	8		0.4672	0.2339	0.0899	0.0232
0.0704	0.1367	0.2222	0.2341	0.3365	9		0.6635	0.4293	0.2071	0.0704
0.211	0.2627	0.2553	0.1614	0.1096	10		0.8904	0.729	0.4737	0.211
0.0017	0.0136	0.0542	0.2608	0.6697	6		0.3303	0.0695	0.0153	0.0017
0.0096	0.036	0.0897	0.2311	0.6337	7		0.3663	0.1353	0.0456	0.0096
0.031	0.0825	0.1627	0.2412	0.4825	8		0.5175	0.2762	0.1135	0.031
0.089	0.1608	0.2339	0.2297	0.2867	9		0.7133	0.4837	0.2498	0.089
0.2506	0.2805	0.2443	0.1404	0.0842	10		0.9158	0.7754	0.5311	0.2506
0.0008	0.0067	0.0298	0.1954	0.7673	6		0.2327	0.0373	0.0075	0.0008	VIII fortification			high fortification
0.0046	0.0172	0.0464	0.1564	0.7754	7		0.2246	0.0682	0.0218	0.0046
0.0146	0.0398	0.09	0.1721	0.6835	8		0.3165	0.1444	0.0544	0.0146
0.0426	0.0822	0.1524	0.191	0.5318	9		0.4682	0.2772	0.1248	0.0426
0.1289	0.1764	0.2195	0.1952	0.28	10		0.72	0.5248	0.3053	0.1289

## Sheet: 2_analytical_masonry
collapse	serious damage	medium damage	slight damage	no damage	UNIT: g	LS1	LS2	LS3	LS4					Group of data
0.002	0.041	0.18	0.46		0.1	0.46	0.18	0.041	0.002	<0.05g fortification	PGA	Fang, book	2011	low-middle fortification
0.038	0.173	0.46	0.77		0.2	0.77	0.46	0.173	0.038
0.1	0.33	0.65	0.89		0.3	0.89	0.65	0.33	0.1
0.18	0.47	0.78	0.94		0.4	0.94	0.78	0.47	0.18
0.26	0.57	0.85	0.97		0.5	0.97	0.85	0.57	0.26
0.33	0.66	0.89	0.98		0.6	0.98	0.89	0.66	0.33
0.4	0.72	0.92	0.99		0.7	0.99	0.92	0.72	0.4
0.48	0.78	0.95	0.99		0.8	0.99	0.95	0.78	0.48
0.52	0.81	0.96	1		0.9	1	0.96	0.81	0.52
0.57	0.85	0.97	1		1	1	0.97	0.85	0.57
0.004	0.02	0.1	0.33		0.1	0.33	0.1	0.02	0.004	=0.05g fortification	PGA			low-middle fortification
0.02	0.104	0.33	0.64		0.2	0.64	0.33	0.104	0.02
0.06	0.22	0.52	0.8		0.3	0.8	0.52	0.22	0.06
0.11	0.33	0.64	0.88		0.4	0.88	0.64	0.33	0.11
0.17	0.43	0.74	0.93		0.5	0.93	0.74	0.43	0.17
0.22	0.52	0.8	0.95		0.6	0.95	0.8	0.52	0.22
0.28	0.59	0.85	0.96		0.7	0.96	0.85	0.59	0.28
0.33	0.65	0.89	0.98		0.8	0.98	0.89	0.65	0.33
0.39	0.7	0.91	0.98		0.9	0.98	0.91	0.7	0.39
0.43	0.75	0.93	0.99		1	0.99	0.93	0.75	0.43
0.001	0.01	0.06	0.24		0.1	0.24	0.06	0.01	0.001	=0.1g fortification	PGA			low-middle fortification
0.005	0.06	0.24	0.55		0.2	0.55	0.24	0.06	0.005
0.04	0.14	0.41	0.73		0.3	0.73	0.41	0.14	0.04
0.07	0.24	0.55	0.83		0.4	0.83	0.55	0.24	0.07
0.1	0.33	0.65	0.89		0.5	0.89	0.65	0.33	0.1
0.15	0.41	0.73	0.92		0.6	0.92	0.73	0.41	0.15
0.2	0.48	0.79	0.95		0.7	0.95	0.79	0.48	0.2
0.24	0.55	0.83	0.96		0.8	0.96	0.83	0.55	0.24
0.31	0.6	0.87	0.97		0.9	0.97	0.87	0.6	0.31
0.33	0.65	0.89	0.98		1	0.98	0.89	0.65	0.33
0.01	0.02	0.065	0.18		0.1	0.18	0.065	0.02	0.01	=0.15g fortification	PGA			low-middle fortification
0.02	0.05	0.18	0.47		0.2	0.47	0.18	0.05	0.02
0.03	0.11	0.34	0.66		0.3	0.66	0.34	0.11	0.03
0.05	0.19	0.48	0.78		0.4	0.78	0.48	0.19	0.05
0.08	0.26	0.57	0.85		0.5	0.85	0.57	0.26	0.08
0.11	0.34	0.66	0.89		0.6	0.89	0.66	0.34	0.11
0.14	0.41	0.72	0.92		0.7	0.92	0.72	0.41	0.14
0.18	0.47	0.78	0.94		0.8	0.94	0.78	0.47	0.18
0.2	0.52	0.81	0.95		0.9	0.95	0.81	0.52	0.2
0.25	0.57	0.85	0.96		1	0.96	0.85	0.57	0.25
0.001	0.01	0.03	0.12		0.1	0.12	0.03	0.01	0.001	=0.2g fortification	PGA			high fortification
0.01	0.03	0.13	0.36		0.2	0.36	0.13	0.03	0.01
0.02	0.07	0.25	0.55		0.3	0.55	0.25	0.07	0.02
0.03	0.13	0.36	0.68		0.4	0.68	0.36	0.13	0.03
0.05	0.19	0.47	0.77		0.5	0.77	0.47	0.19	0.05
0.08	0.25	0.56	0.83		0.6	0.83	0.56	0.25	0.08
0.1	0.31	0.63	0.87		0.7	0.87	0.63	0.31	0.1
0.13	0.37	0.69	0.91		0.8	0.91	0.69	0.37	0.13
0.16	0.42	0.74	0.93		0.9	0.93	0.74	0.42	0.16
0.19	0.47	0.78	0.95		1	0.95	0.78	0.47	0.19
0.001	0.01	0.02	0.1		0.1	0.1	0.02	0.01	0.001	=0.3g fortification	PGA			high fortification
0.01	0.02	0.09	0.31		0.2	0.31	0.09	0.02	0.01
0.01	0.05	0.2	0.49		0.3	0.49	0.2	0.05	0.01
0.02	0.1	0.31	0.63		0.4	0.63	0.31	0.1	0.02
0.04	0.14	0.41	0.72		0.5	0.72	0.41	0.14	0.04
0.05	0.21	0.49	0.79		0.6	0.79	0.49	0.21	0.05
0.08	0.25	0.57	0.84		0.7	0.84	0.57	0.25	0.08
0.1	0.31	0.63	0.88		0.8	0.88	0.63	0.31	0.1
0.12	0.36	0.68	0.91		0.9	0.91	0.68	0.36	0.12
0.15	0.42	0.73	0.92		1	0.92	0.73	0.42	0.15
0.001	0.01	0.02	0.07		0.1	0.07	0.02	0.01	0.001	≥0.4g fortification	PGA			high fortification
0.01	0.02	0.07	0.24		0.2	0.24	0.07	0.02	0.01
0.01	0.04	0.15	0.42		0.3	0.42	0.15	0.04	0.01
0.01	0.07	0.24	0.55		0.4	0.55	0.24	0.07	0.01
0.02	0.11	0.33	0.66		0.5	0.66	0.33	0.11	0.02
0.04	0.15	0.41	0.73		0.6	0.73	0.41	0.15	0.04
0.05	0.19	0.49	0.78		0.7	0.78	0.49	0.19	0.05
0.07	0.24	0.55	0.83		0.8	0.83	0.55	0.24	0.07
0.09	0.29	0.61	0.87		0.9	0.87	0.61	0.29	0.09
0.1	0.33	0.66	0.89		1	0.89	0.66	0.33	0.1
0.00671141	0.0100671	0.0100671	0.0100671		0.05	0.0100671	0.0100671	0.0100671	0.00671141	0.1g fortification	PGA	Gan, master	2009	low-middle fortification	R-miu-T relationship is considered
0.00671141	0.00671141	0.0234899	0.201342		0.1	0.201342	0.0234899	0.00671141	0.00671141
0.00671141	0.0302013	0.137584	0.432886		0.15	0.432886	0.137584	0.0302013	0.00671141
0.0167785	0.0939597	0.265101	0.64094		0.2	0.64094	0.265101	0.0939597	0.0167785
0.0436242	0.184564	0.416107	0.775168		0.25	0.775168	0.416107	0.184564	0.0436242
0.0771812	0.288591	0.540268	0.855705		0.3	0.855705	0.540268	0.288591	0.0771812
0.124161	0.385906	0.654362	0.916107		0.35	0.916107	0.654362	0.385906	0.124161
0.191275	0.483221	0.741611	0.949664		0.4	0.949664	0.741611	0.483221	0.191275
0.251678	0.567114	0.802013	0.969799		0.45	0.969799	0.802013	0.567114	0.251678
0.312081	0.64094	0.845638	0.97651		0.5	0.97651	0.845638	0.64094	0.312081
0.379195	0.694631	0.88255	0.989933		0.55	0.989933	0.88255	0.694631	0.379195
0.436242	0.751678	0.912752	0.996644		0.6	0.996644	0.912752	0.751678	0.436242
0.493289	0.795302	0.92953	0.996644		0.65	0.996644	0.92953	0.795302	0.493289
0.543624	0.828859	0.942953	0.996644		0.7	0.996644	0.942953	0.828859	0.543624
0.597315	0.862416	0.963087	0.996644		0.75	0.996644	0.963087	0.862416	0.597315
0.634228	0.885906	0.966443	0.996644		0.8	0.996644	0.966443	0.885906	0.634228
0.681208	0.902685	0.973154	0.996644		0.85	0.996644	0.973154	0.902685	0.681208
0.708054	0.922819	0.973154	0.996644		0.9	0.996644	0.973154	0.922819	0.708054
0.744966	0.932886	0.979866	0.996644		0.95	0.996644	0.979866	0.932886	0.744966
0.775168	0.939597	0.989933	0.996644		1	0.996644	0.989933	0.939597	0.775168
0.802013	0.95302	0.993289	0.996644		1.05	0.996644	0.993289	0.95302	0.802013
0.825503	0.963087	0.993289	0.996644		1.1	0.996644	0.993289	0.963087	0.825503
0.838926	0.963087	0.996644	0.996644		1.15	0.996644	0.996644	0.963087	0.838926
0.855705	0.963087	0.996644	0.996644		1.2	0.996644	0.996644	0.963087	0.855705
0	0	0	0		0.05	0	0	0	0	0.15g fortification				low-middle fortification
0.00350877	0	0	0.0385965		0.1	0.0385965	0	0	0.00350877
0	0	0.0140351	0.168421		0.15	0.168421	0.0140351	0	0
0	0.0140351	0.0807018	0.336842		0.2	0.336842	0.0807018	0.0140351	0
0	0.0421053	0.168421	0.498246		0.25	0.498246	0.168421	0.0421053	0
0.00701754	0.0877193	0.259649	0.638596		0.3	0.638596	0.259649	0.0877193	0.00701754
0.0210526	0.147368	0.357895	0.729825		0.35	0.729825	0.357895	0.147368	0.0210526
0.0491228	0.210526	0.45614	0.807018		0.4	0.807018	0.45614	0.210526	0.0491228
0.0666667	0.280702	0.54386	0.863158		0.45	0.863158	0.54386	0.280702	0.0666667
0.101754	0.34386	0.617544	0.901754		0.5	0.901754	0.617544	0.34386	0.101754
0.136842	0.414035	0.687719	0.929825		0.55	0.929825	0.687719	0.414035	0.136842
0.178947	0.473684	0.736842	0.947368		0.6	0.947368	0.736842	0.473684	0.178947
0.217544	0.533333	0.789474	0.964912		0.65	0.964912	0.789474	0.533333	0.217544
0.263158	0.582456	0.824561	0.975439		0.7	0.975439	0.824561	0.582456	0.263158
0.305263	0.635088	0.85614	0.982456		0.75	0.982456	0.85614	0.635088	0.305263
0.347368	0.673684	0.877193	0.989474		0.8	0.989474	0.877193	0.673684	0.347368
0.385965	0.712281	0.894737	0.989474		0.85	0.989474	0.894737	0.712281	0.385965
0.435088	0.750877	0.919298	0.992982		0.9	0.992982	0.919298	0.750877	0.435088
0.463158	0.782456	0.933333	0.996491		0.95	0.996491	0.933333	0.782456	0.463158
0.512281	0.807018	0.940351	0.996491		1	0.996491	0.940351	0.807018	0.512281
0.540351	0.838596	0.950877	0.996491		1.05	0.996491	0.950877	0.838596	0.540351
0.568421	0.852632	0.954386	0.996491		1.1	0.996491	0.954386	0.852632	0.568421
0.607018	0.870175	0.954386	0.996491		1.15	0.996491	0.954386	0.870175	0.607018
0.631579	0.891228	0.954386	0.996491		1.2	0.996491	0.954386	0.891228	0.631579
0.00576369	0.00576369	0.00576369	0.00576369		0.05	0.00576369	0.00576369	0.00576369	0.00576369	0.2g fortification				high fortification
0.00576369	0.00864553	0.00576369	0.00864553		0.1	0.00864553	0.00576369	0.00864553	0.00576369
0.00864553	0.00576369	0.00864553	0.0778098		0.15	0.0778098	0.00864553	0.00576369	0.00864553
0.00576369	0.00864553	0.0317003	0.184438		0.2	0.184438	0.0317003	0.00864553	0.00576369
0.00864553	0.0172911	0.0720461	0.302594		0.25	0.302594	0.0720461	0.0172911	0.00864553
0.00576369	0.037464	0.135447	0.435159		0.3	0.435159	0.135447	0.037464	0.00576369
0.0144092	0.0605187	0.198847	0.541787		0.35	0.541787	0.198847	0.0605187	0.0144092
0.0115274	0.0951009	0.268012	0.62536		0.4	0.62536	0.268012	0.0951009	0.0115274
0.0345821	0.14121	0.345821	0.711816		0.45	0.711816	0.345821	0.14121	0.0345821
0.0403458	0.193084	0.417867	0.769452		0.5	0.769452	0.417867	0.193084	0.0403458
0.0576369	0.239193	0.487032	0.824207		0.55	0.824207	0.487032	0.239193	0.0576369
0.0778098	0.282421	0.544669	0.855908		0.6	0.855908	0.544669	0.282421	0.0778098
0.100865	0.337176	0.605187	0.884726		0.65	0.884726	0.605187	0.337176	0.100865
0.121037	0.383285	0.651297	0.907781		0.7	0.907781	0.651297	0.383285	0.121037
0.15562	0.435159	0.70317	0.933718		0.75	0.933718	0.70317	0.435159	0.15562
0.184438	0.478386	0.737752	0.945245		0.8	0.945245	0.737752	0.478386	0.184438
0.216138	0.524496	0.766571	0.956772		0.85	0.956772	0.766571	0.524496	0.216138
0.244957	0.56196	0.795389	0.9683		0.9	0.9683	0.795389	0.56196	0.244957
0.279539	0.602305	0.829971	0.976945		0.95	0.976945	0.829971	0.602305	0.279539
0.311239	0.636888	0.847262	0.979827		1	0.979827	0.847262	0.636888	0.311239
0.351585	0.674352	0.870317	0.985591		1.05	0.985591	0.870317	0.674352	0.351585
0.37464	0.694524	0.896254	0.988473		1.1	0.988473	0.896254	0.694524	0.37464
0.400576	0.73487	0.916427	0.988473		1.15	0.988473	0.916427	0.73487	0.400576
0.446686	0.755043	0.930836	0.997118		1.2	0.997118	0.930836	0.755043	0.446686
0.00852273	0.00568182	0.00568182	0.00284091		0.05	0.00284091	0.00568182	0.00568182	0.00852273	0.3g fortification				high fortification
0.00852273	0.00852273	0.00852273	0.00568182		0.1	0.00568182	0.00852273	0.00852273	0.00852273
0.00568182	0.00852273	0.00852273	0.0113636		0.15	0.0113636	0.00852273	0.00852273	0.00568182
0.00852273	0.00852273	0.0113636	0.0539773		0.2	0.0539773	0.0113636	0.00852273	0.00852273
0.00852273	0.00852273	0.0142045	0.113636		0.25	0.113636	0.0142045	0.00852273	0.00852273
0.00568182	0.00852273	0.03125	0.190341		0.3	0.190341	0.03125	0.00852273	0.00568182
0.00568182	0.0113636	0.0511364	0.269886		0.35	0.269886	0.0511364	0.0113636	0.00568182
0.00852273	0.0198864	0.0852273	0.346591		0.4	0.346591	0.0852273	0.0198864	0.00852273
0.00568182	0.03125	0.127841	0.431818		0.45	0.431818	0.127841	0.03125	0.00568182
0.0142045	0.0539773	0.176136	0.5		0.5	0.5	0.176136	0.0539773	0.0142045
0.0142045	0.0738636	0.224432	0.571023		0.55	0.571023	0.224432	0.0738636	0.0142045
0.0170455	0.0994318	0.267045	0.633523		0.6	0.633523	0.267045	0.0994318	0.0170455
0.0198864	0.119318	0.315341	0.684659		0.65	0.684659	0.315341	0.119318	0.0198864
0.0284091	0.150568	0.372159	0.732955		0.7	0.732955	0.372159	0.150568	0.0284091
0.0369318	0.1875	0.417614	0.778409		0.75	0.778409	0.417614	0.1875	0.0369318
0.0568182	0.221591	0.463068	0.809659		0.8	0.809659	0.463068	0.221591	0.0568182
0.0625	0.252841	0.514205	0.840909		0.85	0.840909	0.514205	0.252841	0.0625
0.0852273	0.289773	0.553977	0.860795		0.9	0.860795	0.553977	0.289773	0.0852273
0.0965909	0.321023	0.59375	0.877841		0.95	0.877841	0.59375	0.321023	0.0965909
0.113636	0.355114	0.619318	0.900568		1	0.900568	0.619318	0.355114	0.113636
0.133523	0.386364	0.65625	0.914773		1.05	0.914773	0.65625	0.386364	0.133523
0.150568	0.420455	0.701705	0.931818		1.1	0.931818	0.701705	0.420455	0.150568
0.170455	0.457386	0.724432	0.940341		1.15	0.940341	0.724432	0.457386	0.170455
0.193182	0.477273	0.747159	0.948864		1.2	0.948864	0.747159	0.477273	0.193182
0.00566572	0.00849858	0.00849858	0.00849858		0.05	0.00849858	0.00849858	0.00849858	0.00566572	0.4g fortification				high fortification
0.0113314	0.00849858	0.0113314	0.0113314		0.1	0.0113314	0.0113314	0.00849858	0.0113314
0.0113314	0.00849858	0.0113314	0.0113314		0.15	0.0113314	0.0113314	0.00849858	0.0113314
0.0113314	0.00849858	0.0169972	0.0141643		0.2	0.0141643	0.0169972	0.00849858	0.0113314
0.0113314	0.00849858	0.0169972	0.0453258		0.25	0.0453258	0.0169972	0.00849858	0.0113314
0.0113314	0.00849858	0.0169972	0.0934844		0.3	0.0934844	0.0169972	0.00849858	0.0113314
0.0141643	0.0113314	0.0169972	0.133144		0.35	0.133144	0.0169972	0.0113314	0.0141643
0.0141643	0.0169972	0.0339943	0.189802		0.4	0.189802	0.0339943	0.0169972	0.0141643
0.0141643	0.01983	0.0481586	0.246459		0.45	0.246459	0.0481586	0.01983	0.0141643
0.0169972	0.0226629	0.0679887	0.311615		0.5	0.311615	0.0679887	0.0226629	0.0169972
0.0141643	0.0311615	0.0991501	0.371105		0.55	0.371105	0.0991501	0.0311615	0.0141643
0.0141643	0.0396601	0.135977	0.433428		0.6	0.433428	0.135977	0.0396601	0.0141643
0.0141643	0.0538244	0.167139	0.495751		0.65	0.495751	0.167139	0.0538244	0.0141643
0.0169972	0.0764873	0.206799	0.538244		0.7	0.538244	0.206799	0.0764873	0.0169972
0.01983	0.082153	0.243626	0.589235		0.75	0.589235	0.243626	0.082153	0.01983
0.0226629	0.0991501	0.27762	0.637394		0.8	0.637394	0.27762	0.0991501	0.0226629
0.0226629	0.130312	0.31728	0.668555		0.85	0.668555	0.31728	0.130312	0.0226629
0.0311615	0.13881	0.348442	0.708215		0.9	0.708215	0.348442	0.13881	0.0311615
0.0368272	0.167139	0.388102	0.739377		0.95	0.739377	0.388102	0.167139	0.0368272
0.0424929	0.192635	0.424929	0.767705		1	0.767705	0.424929	0.192635	0.0424929
0.0566572	0.212465	0.461756	0.804533		1.05	0.804533	0.461756	0.212465	0.0566572
0.0651558	0.246459	0.504249	0.82153		1.1	0.82153	0.504249	0.246459	0.0651558
0.0736544	0.25779	0.529745	0.838527		1.15	0.838527	0.529745	0.25779	0.0736544
0.0849858	0.283286	0.555241	0.852691		1.2	0.852691	0.555241	0.283286	0.0849858

## Sheet: 3_RC
collapse	serious damage	medium damage	slight damage	no damage	Intensity	LS1	LS2	LS3	LS4				Group of data	notes
0	0.1863	0.2516	0.3168	0.2453	8	0.7547	0.4379	0.1863	0		Zhou et al.	2011	unspecified fortification
0	0.0009	0.0089	0.1583	0.8319	6	0.1681	0.0098	0.0009	0		Ming et al.	2017
0	0.0169	0.0849	0.3186	0.5796	7	0.4204	0.1018	0.0169	0
0.0169	0.0889	0.1538	0.3408	0.3996	8	0.6004	0.2596	0.1058	0.0169
0.1926	0.1045	0.1916	0.2801	0.2312	9	0.7688	0.4887	0.2971	0.1926
0	0.001	0.0092	0.1601	0.8317	6	0.1683	0.0102	0.001	0		He et al.	2016
0	0.0213	0.0975	0.3304	0.5775	7	0.4225	0.1188	0.0213	0
0.0146	0.0902	0.1546	0.3708	0.3847	8	0.6153	0.2594	0.1048	0.0146
0.023	0.2022	0.5278	0.2382	0.0088	9	0.9912	0.753	0.2252	0.023
0.5778	0.1936	0.1429	0.0857	0	10	1	0.9143	0.7714	0.5778
0	0.009	0.024	0.195	0.77	6	0.23	0.033	0.009	0		Qiu & Gao	2015
0	0.038	0.194	0.292	0.476	7	0.524	0.232	0.038	0
0.022	0.182	0.352	0.26	0.184	8	0.816	0.556	0.204	0.022
0.107	0.493	0.119	0.119	0.162	9	0.838	0.719	0.6	0.107
0.421	0.458	0.067	0.028	0.026	10	0.974	0.946	0.879	0.421
0	0	0	0	1	6	0	0	0	0		Li et al.	2013
0	0	0	0	1	7	0	0	0	0
0	0	0.0332	0.2026	0.7642	8	0.2358	0.0332	0	0
0.054	0.213	0.4736	0.2504	0.009	9	0.991	0.7406	0.267	0.054
0	0	0	0.03	0.97	6	0.03	0	0	0		Wei et al.	2008
0	0	0.01	0.06	0.93	7	0.07	0.01	0	0
0	0.01	0.09	0.43	0.47	8	0.53	0.1	0.01	0
0.02	0.14	0.39	0.42	0.03	9	0.97	0.55	0.16	0.02
0.23	0.55	0.19	0.03	0	10	1	0.97	0.78	0.23
0	0.03	0.06	0.38	0.52	8	0.48	0.09	0.03	0		Shi et al.	2007
0	0	0	0.18	0.82	6	0.18	0	0	0
0.09	0.26	0.25	0.27	0.13	8	0.87	0.6	0.35	0.09
0	0	0.14	0.71	0.15	7	0.85	0.14	0	0
0	0	0	0.13	0.87	6	0.13	0	0	0
0	0	0	0.12	0.88	6	0.12	0	0	0		Wang, master	2007
0	0	0.02	0.23	0.75	7	0.25	0.02	0	0
0.002	0.015	0.103	0.33	0.55	8	0.45	0.12	0.017	0.002
0.015	0.075	0.255	0.305	0.35	9	0.65	0.345	0.09	0.015
0.075	0.165	0.405	0.203	0.15	10	0.85	0.645	0.24	0.075
0.1306	0.1484	0.2286	0.2101	0.2823	10	0.7177	0.5076	0.279	0.1306		Yuan	2008
0.038	0.1935	0.247	0.2078	0.3137	9	0.6863	0.4785	0.2315	0.038
0.003	0.0175	0.0599	0.0964	0.8232	8	0.1768	0.0804	0.0205	0.003
0	0.003	0.0213	0.0527	0.923	7	0.077	0.0243	0.003	0
0	0	0	0.15	0.85	6	0.15	0	0	0	VI fortification	He & Fu	2009	low fortification
0	0	0.05	0.35	0.6	7	0.4	0.05	0	0
0.005	0.025	0.21	0.36	0.4	8	0.6	0.24	0.03	0.005
0.025	0.125	0.28	0.37	0.2	9	0.8	0.43	0.15	0.025
0.095	0.255	0.395	0.155	0.1	10	0.9	0.745	0.35	0.095
0	0	0	0.12	0.88	6	0.12	0	0	0	VII fortification			middle fortification
0	0	0.02	0.23	0.75	7	0.25	0.02	0	0
0.002	0.015	0.103	0.33	0.55	8	0.45	0.12	0.017	0.002
0.015	0.075	0.255	0.305	0.35	9	0.65	0.345	0.09	0.015
0.075	0.165	0.405	0.205	0.15	10	0.85	0.645	0.24	0.075
0	0	0	0.1	0.9	6	0.1	0	0	0	VIII fortification			high fortification
0	0	0.01	0.14	0.85	7	0.15	0.01	0	0
0	0	0.05	0.25	0.7	8	0.3	0.05	0	0
0.005	0.035	0.145	0.315	0.5	9	0.5	0.185	0.04	0.005
0.045	0.105	0.35	0.3	0.2	10	0.8	0.5	0.15	0.045
0	0.001	0.0092	0.1601	0.8317	6	0.1683	0.0102	0.001	0		Yang et al.	2017	unspecified fortification
0	0.0213	0.0975	0.3304	0.5775	7	0.4225	0.1188	0.0213	0
0.0146	0.0902	0.1546	0.3708	0.3847	8	0.6153	0.2594	0.1048	0.0146
0.023	0.2022	0.5278	0.2382	0.0088	9	0.9912	0.753	0.2252	0.023
0.5778	0.1936	0.1429	0.0857	0	10	1	0.9143	0.7714	0.5778
0	0	0.0136	0.1251	0.8662	6	0.1338	0.0136	0	0
0	0	0.0061	0.2014	0.7935	7	0.2065	0.0061	0	0
0.0419	0.0828	0.131	0.3318	0.4126	8	0.5874	0.2557	0.1247	0.0419
0	0.031746	0.174603	0.396825	0.396825	6	0.603175	0.206349	0.031746	0	VII fortification			middle fortification
0	0.0411	0.0984	0.3166	0.6006	7	0.3994	0.1395	0.0411	0
0.0625	0.1875	0.1875	0.3125	0.25	8	0.75	0.4375	0.25	0.0625
0	0	0.021	0.1433	0.8507	6	0.1493	0.021	0	0	VIII fortification			high fortification
0	0	0.0694	0.3548	0.5873	7	0.4127	0.0694	0	0
0	0.05	0.26	0.43	0.26	8	0.74	0.31	0.05	0
0	0	0	0.055	0.945	6	0.055	0	0	0		Wen et al.	2017	unspecified fortification
0	0	0	0.112	0.888	7	0.112	0	0	0
0	0	0	0.316	0.684	8	0.316	0	0	0
0	0	0	0.05	0.95	6	0.05	0	0	0	high fortification	Piao, master	2013	high fortification
0	0	0.02	0.13	0.85	7	0.15	0.02	0	0
0	0.01	0.06	0.43	0.5	8	0.5	0.07	0.01	0
0.04	0.18	0.31	0.28	0.19	9	0.81	0.53	0.22	0.04
0.2	0.45	0.26	0.07	0.02	10	0.98	0.91	0.65	0.2
0	0	0.005	0.06	0.935	6	0.065	0.005	0	0	low fortification			low fortification
0	0	0.04	0.15	0.81	7	0.19	0.04	0	0
0	0.02	0.08	0.46	0.44	8	0.56	0.1	0.02	0
0.07	0.23	0.28	0.27	0.15	9	0.85	0.58	0.3	0.07
0.25	0.55	0.14	0.05	0.01	10	0.99	0.94	0.8	0.25
0	0	0	0	1	6	0	0	0	0	high-story buildings, VIII,IX high fortification	Sun et al.	2014	high fortification
0	0	0	0.05	0.95	7	0.05	0	0	0
0	0	0.03	0.42	0.55	8	0.45	0.03	0	0
0	0.02	0.31	0.52	0.15	9	0.85	0.33	0.02	0
0.05	0.22	0.4	0.28	0.05	10	0.95	0.67	0.27	0.05
0	0	0	0.05	0.95	6	0.05	0	0	0	VIII, IX high fortification
0	0	0.02	0.13	0.85	7	0.15	0.02	0	0
0	0.01	0.06	0.43	0.5	8	0.5	0.07	0.01	0
0.02	0.14	0.25	0.34	0.25	9	0.75	0.41	0.16	0.02
0.2	0.45	0.26	0.07	0.02	10	0.98	0.91	0.65	0.2
0	0	0	0	1	6	0	0	0	0	high-story buildings, VI,VII middle fortification			middle fortification
0	0	0	0.05	0.95	7	0.05	0	0	0
0	0	0.05	0.44	0.51	8	0.49	0.05	0	0
0	0.04	0.37	0.47	0.12	9	0.88	0.41	0.04	0
0.08	0.25	0.43	0.22	0.02	10	0.98	0.76	0.33	0.08
0	0	0.005	0.06	0.935	6	0.065	0.005	0	0	VI, VII middle fortification
0	0	0.04	0.15	0.81	7	0.19	0.04	0	0
0	0.02	0.08	0.46	0.44	8	0.56	0.1	0.02	0
0.04	0.2	0.25	0.36	0.15	9	0.85	0.49	0.24	0.04
0.25	0.55	0.14	0.05	0.01	10	0.99	0.94	0.8	0.25
0	0	0	0.12	0.88	6	0.12	0	0	0	analytical using Yin(1995)	Chen et al.	1999	unspecified fortification
0	0	0.02	0.23	0.75	7	0.25	0.02	0	0
0	0.02	0.1	0.33	0.55	8	0.45	0.12	0.02	0
0.02	0.07	0.26	0.3	0.35	9	0.65	0.35	0.09	0.02
0	0	0.0132	0.1868	0.8004	6	0.1996	0.0132	0	0		Zhou et al.	2007
0	0.0158	0.0765	0.3007	0.607	7	0.393	0.0923	0.0158	0
0	0.0188	0.0973	0.7717	0.1121	8	0.8879	0.1161	0.0188	0
0	0.12	0.33	0.34	0.21	9	0.79	0.45	0.12	0
0	0	0	0.15	0.85	6	0.15	0	0	0	VI fortification	Xia, master	2009	low fortification	analytical using Yin (1995)
0	0	0.05	0.35	0.6	7	0.4	0.05	0	0
0.005	0.025	0.21	0.36	0.4	8	0.6	0.24	0.03	0.005
0.025	0.125	0.28	0.37	0.2	9	0.8	0.43	0.15	0.025
0.095	0.255	0.395	0.155	0.1	10	0.9	0.745	0.35	0.095
0	0	0	0.12	0.88	6	0.12	0	0	0	VII fortification			middle fortification
0	0	0.02	0.23	0.75	7	0.25	0.02	0	0
0.002	0.015	0.103	0.33	0.55	8	0.45	0.12	0.017	0.002
0.015	0.075	0.255	0.305	0.35	9	0.65	0.345	0.09	0.015
0.075	0.165	0.405	0.205	0.15	10	0.85	0.645	0.24	0.075
0	0	0	0.05	0.95	6	0.05	0	0	0	VIII fortification			high fortification
0	0	0	0.1	0.9	7	0.1	0	0	0
0	0	0.05	0.15	0.8	8	0.2	0.05	0	0
0	0.01	0.085	0.355	0.55	9	0.45	0.095	0.01	0
0.025	0.055	0.27	0.35	0.3	10	0.7	0.35	0.08	0.025
0	0	0.001	0.001	0.998	6	0.002	0.001	0	0	simulated damage matrix for Xi'an, Yanliang District	Hu & Sun	2010	unspecified fortification	analytical using Zhang & Sun (2010)
0	0	0.002	0.164	0.834	7	0.166	0.002	0	0
0	0.004	0.144	0.638	0.214	8	0.786	0.148	0.004	0
0.002	0.174	0.577	0.243	0.004	9	0.996	0.753	0.176	0.002
0.195	0.55	0.25	0.005	0	10	1	0.995	0.745	0.195
0	0	0	0	1	6	0	0	0	0	site-surveyed damage matrix in Xi'an, Yanliang District
0	0	0	0.156	0.844	7	0.156	0	0	0
0	0	0.141	0.732	0.127	8	0.873	0.141	0	0
0	0.213	0.535	0.252	0	9	1	0.748	0.213	0
0.222	0.521	0.255	0.002	0	10	1	0.998	0.743	0.222
0	0	0	0.12	0.88	6	0.12	0	0	0		Yin	1996
0	0	0.02	0.23	0.75	7	0.25	0.02	0	0
0.002	0.015	0.103	0.33	0.55	8	0.45	0.12	0.017	0.002
0.015	0.075	0.255	0.305	0.35	9	0.65	0.345	0.09	0.015
0.075	0.165	0.405	0.205	0.15	10	0.85	0.645	0.24	0.075

## Sheet: 4_analytical_RC
collapse	serious damage	medium damage	slight damage	no damage	UNIT: g	LS1	LS2	LS3	LS4	supplement information				Group of data
0	0	0	0		0.025	0	0	0	0	DHA method, beta d=0.3	PGA	Zeng, PhD	2013	unspecified fortification
0	0	0.02	0.07		0.05	0.07	0.02	0	0
0	0	0.11	0.31		0.075	0.31	0.11	0	0
0	0	0.25	0.47		0.1	0.47	0.25	0	0
0	0.02	0.33	0.62		0.125	0.62	0.33	0.02	0
0	0.06	0.52	0.7		0.15	0.7	0.52	0.06	0
0	0.1	0.6	0.78		0.175	0.78	0.6	0.1	0
0	0.16	0.65	0.83		0.2	0.83	0.65	0.16	0
0.009	0.27	0.7	0.88		0.225	0.88	0.7	0.27	0.009
0.027	0.33	0.73	0.92		0.25	0.92	0.73	0.33	0.027
0.027	0.39	0.78	0.93		0.275	0.93	0.78	0.39	0.027
0.054	0.44	0.83	0.94		0.3	0.94	0.83	0.44	0.054
0.063	0.51	0.85	0.96		0.325	0.96	0.85	0.51	0.063
0.099	0.56	0.88	0.96		0.35	0.96	0.88	0.56	0.099
0.135	0.6	0.9	0.96		0.375	0.96	0.9	0.6	0.135
0.153	0.65	0.91	0.97		0.4	0.97	0.91	0.65	0.153
0.207	0.68	0.92	0.98		0.425	0.98	0.92	0.68	0.207
0.243	0.72	0.93	0.99		0.45	0.99	0.93	0.72	0.243
0.324	0.77	0.93	0.99		0.475	0.99	0.93	0.77	0.324
0.333	0.8	0.95	0.99		0.5	0.99	0.95	0.8	0.333
0.369	0.81	0.95	0.99		0.525	0.99	0.95	0.81	0.369
0.378	0.83	0.95	0.99		0.55	0.99	0.95	0.83	0.378
0.387	0.85	0.96	0.99		0.575	0.99	0.96	0.85	0.387
0.414	0.86	0.96	0.99		0.6	0.99	0.96	0.86	0.414
0	0	0	0		0.025	0	0	0	0	DHA method, beta d=0.7	PGA
0	0	0	0.02		0.05	0.02	0	0	0
0	0	0.03	0.08		0.075	0.08	0.03	0	0
0	0	0.08	0.18		0.1	0.18	0.08	0	0
0	0	0.15	0.29		0.125	0.29	0.15	0	0
0	0.02	0.26	0.38		0.15	0.38	0.26	0.02	0
0	0.03	0.29	0.5		0.175	0.5	0.29	0.03	0
0	0.06	0.38	0.58		0.2	0.58	0.38	0.06	0
0	0.08	0.48	0.64		0.225	0.64	0.48	0.08	0
0	0.1	0.57	0.72		0.25	0.72	0.57	0.1	0
0.01	0.14	0.62	0.72		0.275	0.72	0.62	0.14	0.01
0.02	0.18	0.66	0.79		0.3	0.79	0.66	0.18	0.02
0.02	0.23	0.72	0.81		0.325	0.81	0.72	0.23	0.02
0.03	0.26	0.72	0.84		0.35	0.84	0.72	0.26	0.03
0.04	0.29	0.75	0.86		0.375	0.86	0.75	0.29	0.04
0.05	0.31	0.79	0.88		0.4	0.88	0.79	0.31	0.05
0.06	0.35	0.81	0.91		0.425	0.91	0.81	0.35	0.06
0.08	0.38	0.83	0.92		0.45	0.92	0.83	0.38	0.08
0.09	0.44	0.85	0.92		0.475	0.92	0.85	0.44	0.09
0.1	0.48	0.86	0.92		0.5	0.92	0.86	0.48	0.1
0.11	0.52	0.89	0.92		0.525	0.92	0.89	0.52	0.11
0.14	0.54	0.9	0.92		0.55	0.92	0.9	0.54	0.14
0.16	0.58	0.91	0.93		0.575	0.93	0.91	0.58	0.16
0.18	0.6	0.92	0.94		0.6	0.94	0.92	0.6	0.18
0	0	0	0	1	0.05	0	0	0	0		PGA, G10-storey	Liu, PhD	2017
0	0	0	0.0321	0.9679	0.1	0.0321	0	0	0
0	0.0012	0.0095	0.1262	0.8631	0.15	0.1262	0.0095	0.0012	0
0	0.006	0.0345	0.219	0.7405	0.2	0.219	0.0345	0.006	0
0.0036	0.0571	0.0679	0.3488	0.5226	0.3	0.3488	0.0679	0.0571	0.0036
0.0155	0.1036	0.125	0.4143	0.3417	0.4	0.4143	0.125	0.1036	0.0155
0.0905	0.2048	0.1702	0.4417	0.0929	0.6	0.4417	0.1702	0.2048	0.0905
0.1738	0.2679	0.2071	0.3512	0	0.8	0.3512	0.2071	0.2679	0.1738
0.2667	0.3167	0.2167	0.2	0	1	0.2	0.2167	0.3167	0.2667
0.3679	0.3333	0.1952	0.1036	0	1.2	0.1036	0.1952	0.3333	0.3679
0.4452	0.3607	0.15	0.044	0	1.4	0.044	0.15	0.3607	0.4452
0.5286	0.3464	0.125	0	0	1.6	0	0.125	0.3464	0.5286
0	0	0	0	1	0.05	0	0	0	0	The period of groud motion within the range of (0,0.3)s	PGA, G10-storey
0	0	0	0	1	0.1	0	0	0	0
0	0	0	0.0106	0.9894	0.15	0.0106	0	0	0
0	0	0	0.037	0.963	0.2	0.037	0	0	0
0	0.0053	0.0053	0.164	0.8254	0.3	0.164	0.0053	0.0053	0
0	0.0106	0.0265	0.3122	0.6508	0.4	0.3122	0.0265	0.0106	0
0.0053	0.0741	0.0847	0.6243	0.2116	0.6	0.6243	0.0847	0.0741	0.0053
0.0212	0.1323	0.1746	0.672	0	0.8	0.672	0.1746	0.1323	0.0212
0.0582	0.2063	0.3016	0.4339	0	1	0.4339	0.3016	0.2063	0.0582
0.1058	0.3069	0.3651	0.2222	0	1.2	0.2222	0.3651	0.3069	0.1058
0.164	0.4286	0.3069	0.1005	0	1.4	0.1005	0.3069	0.4286	0.164
0.2328	0.4603	0.3069	0	0	1.6	0	0.3069	0.4603	0.2328
0	0	0	0	1	0.05	0	0	0	0	The period of groud motion within the range of [0.3,0.45)s	PGA, G10-storey
0	0	0	0.0084	0.9916	0.1	0.0084	0	0	0
0	0	0	0.0378	0.9622	0.15	0.0378	0	0	0
0	0	0.0126	0.0882	0.8992	0.2	0.0882	0.0126	0	0
0	0.0126	0.0252	0.2437	0.7185	0.3	0.2437	0.0252	0.0126	0
0.0042	0.0294	0.0588	0.4286	0.479	0.4	0.4286	0.0588	0.0294	0.0042
0.021	0.0882	0.1639	0.5966	0.1303	0.6	0.5966	0.1639	0.0882	0.021
0.0546	0.2017	0.2605	0.4832	0	0.8	0.4832	0.2605	0.2017	0.0546
0.1008	0.3067	0.3109	0.2815	0	1	0.2815	0.3109	0.3067	0.1008
0.1849	0.3866	0.2773	0.1513	0	1.2	0.1513	0.2773	0.3866	0.1849
0.2563	0.4622	0.2185	0.063	0	1.4	0.063	0.2185	0.4622	0.2563
0.3361	0.5084	0.1555	0	0	1.6	0	0.1555	0.5084	0.3361
0	0	0	0	1	0.05	0	0	0	0	The period of groud motion within the range of [0.45,0.6)s	PGA, G10-storey
0	0	0	0.0275	0.9725	0.1	0.0275	0	0	0
0	0	0.0165	0.1209	0.8626	0.15	0.1209	0.0165	0	0
0	0	0.0385	0.3022	0.6593	0.2	0.3022	0.0385	0	0
0	0.0604	0.0604	0.478	0.4011	0.3	0.478	0.0604	0.0604	0
0.022	0.0.0824	0.1813	0.5165	0.1978	0.4	0.5165	0.1813	0.0.0824	0.022
0.0714	0.3187	0.1978	0.3791	0.033	0.6	0.3791	0.1978	0.3187	0.0714
0.1813	0.3736	0.2418	0.2033	0	0.8	0.2033	0.2418	0.3736	0.1813
0.3462	0.4011	0.1758	0.0769	0	1	0.0769	0.1758	0.4011	0.3462
0.478	0.3736	0.1154	0.033	0	1.2	0.033	0.1154	0.3736	0.478
0.5549	0.3681	0.0604	0.0165	0	1.4	0.0165	0.0604	0.3681	0.5549
0.6593	0.322	0.0385	0	0	1.6	0	0.0385	0.322	0.6593
0	0	0	0	1	0.05	0	0	0	0	The period of groud motion within the range of [0.6,1.2)s	PGA, G10-storey
0	0	0	0.0866	0.9134	0.1	0.0866	0	0	0
0	0.0043	0.0216	0.316	0.658	0.15	0.316	0.0216	0.0043	0
0	0.0216	0.0823	0.4372	0.4589	0.2	0.4372	0.0823	0.0216	0
0.013	0.1429	0.1688	0.5065	0.1688	0.3	0.5065	0.1688	0.1429	0.013
0.0346	0.2727	0.2294	0.4026	0.0606	0.4	0.4026	0.2294	0.2727	0.0346
0.2468	0.342	0.2251	0.1818	0.0043	0.6	0.1818	0.2251	0.342	0.2468
0.4156	0.3636	0.1515	0.0693	0	0.8	0.0693	0.1515	0.3636	0.4156
0.5455	0.3506	0.0823	0.0216	0	1	0.0216	0.0823	0.3506	0.5455
0.684	0.2684	0.0346	0.013	0	1.2	0.013	0.0346	0.2684	0.684
0.7835	0.1948	0.0216	0	0	1.4	0	0.0216	0.1948	0.7835
0.8658	0.1212	0.013	0	0	1.6	0	0.013	0.1212	0.8658
0	0	0	0	1	0.05	0	0	0	0		PGA, G10-storey, lower than 20-storey			unspecified fortification
0	0	0	0.0458	0.9542	0.1	0.0458	0	0	0
0	0.0021	0.0146	0.1229	0.8604	0.15	0.1229	0.0146	0.0021	0
0	0.0083	0.0292	0.2188	0.7438	0.2	0.2188	0.0292	0.0083	0
0.0063	0.0521	0.0708	0.3167	0.5542	0.3	0.3167	0.0708	0.0521	0.0063
0.0167	0.1021	0.125	0.3792	0.3771	0.4	0.3792	0.125	0.1021	0.0167
0.0958	0.1917	0.15	0.4625	0.1	0.6	0.4625	0.15	0.1917	0.0958
0.1813	0.2333	0.2	0.3854	0	0.8	0.3854	0.2	0.2333	0.1813
0.2583	0.2917	0.2354	0.2146	0	1	0.2146	0.2354	0.2917	0.2583
0.3375	0.3229	0.2271	0.1125	0	1.2	0.1125	0.2271	0.3229	0.3375
0.4146	0.3813	0.1604	0.0438	0	1.4	0.0438	0.1604	0.3813	0.4146
0.5063	0.3521	0.1417	0	0	1.6	0	0.1417	0.3521	0.5063
0	0	0	0	1	0.05	0	0	0	0		PGA, G20-storey
0	0	0	0.0139	0.9861	0.1	0.0139	0	0	0
0	0	0.0028	0.1306	0.8667	0.15	0.1306	0.0028	0	0
0	0.0028	0.0417	0.2194	0.7361	0.2	0.2194	0.0417	0.0028	0
0	0.0639	0.0639	0.3917	0.4806	0.3	0.3917	0.0639	0.0639	0
0.0139	0.1056	0.125	0.4611	0.2944	0.4	0.4611	0.125	0.1056	0.0139
0.0833	0.2222	0.1972	0.4139	0.0833	0.6	0.4139	0.1972	0.2222	0.0833
0.1639	0.3139	0.2167	0.3056	0	0.8	0.3056	0.2167	0.3139	0.1639
0.2778	0.35	0.1917	0.1806	0	1	0.1806	0.1917	0.35	0.2778
0.4083	0.3472	0.1528	0.0917	0	1.2	0.0917	0.1528	0.3472	0.4083
0.4861	0.3333	0.1361	0.0444	0	1.4	0.0444	0.1361	0.3333	0.4861
0.5583	0.3389	0.1028	0	0	1.6	0	0.1028	0.3389	0.5583
0.001	0.014	0.06	0.24		0.1	0.24	0.06	0.014	0.001	<0.05g fortification	PGA, unknown method	Fang, book	2011	low fortification
0.014	0.066	0.24	0.55		0.2	0.55	0.24	0.066	0.014
0.035	0.152	0.41	0.73		0.3	0.73	0.41	0.152	0.035
0.07	0.25	0.55	0.83		0.4	0.83	0.55	0.25	0.07
0.11	0.34	0.65	0.89		0.5	0.89	0.65	0.34	0.11
0.15	0.42	0.73	0.92		0.6	0.92	0.73	0.42	0.15
0.2	0.49	0.79	0.95		0.7	0.95	0.79	0.49	0.2
0.25	0.55	0.83	0.97		0.8	0.97	0.83	0.55	0.25
0.3	0.61	0.87	0.98		0.9	0.98	0.87	0.61	0.3
0.35	0.65	0.89	0.98		1	0.98	0.89	0.65	0.35
0.001	0.006	0.03	0.15		0.1	0.15	0.03	0.006	0.001	=0.05g fortification
0.009	0.035	0.15	0.41		0.2	0.41	0.15	0.035	0.009
0.022	0.089	0.29	0.6		0.3	0.6	0.29	0.089	0.022
0.04	0.15	0.41	0.73		0.4	0.73	0.41	0.15	0.04
0.06	0.22	0.52	0.81		0.5	0.81	0.52	0.22	0.06
0.09	0.29	0.61	0.86		0.6	0.86	0.61	0.29	0.09
0.12	0.36	0.68	0.9		0.7	0.9	0.68	0.36	0.12
0.16	0.41	0.73	0.92		0.8	0.92	0.73	0.41	0.16
0.19	0.47	0.78	0.94		0.9	0.94	0.78	0.47	0.19
0.22	0.52	0.82	0.95		1	0.95	0.82	0.52	0.22
0.001	0.01	0.03	0.1		0.1	0.1	0.03	0.01	0.001	=0.1g fortification				middle fortification
0.01	0.03	0.1	0.32		0.2	0.32	0.1	0.03	0.01
0.02	0.05	0.21	0.51		0.3	0.51	0.21	0.05	0.02
0.02	0.1	0.32	0.64		0.4	0.64	0.32	0.1	0.02
0.04	0.15	0.42	0.73		0.5	0.73	0.42	0.15	0.04
0.06	0.21	0.51	0.8		0.6	0.8	0.51	0.21	0.06
0.08	0.26	0.58	0.85		0.7	0.85	0.58	0.26	0.08
0.09	0.31	0.64	0.88		0.8	0.88	0.64	0.31	0.09
0.12	0.37	0.69	0.91		0.9	0.91	0.69	0.37	0.12
0.15	0.42	0.73	0.92		1	0.92	0.73	0.42	0.15
0.001	0.01	0.02	0.07		0.1	0.07	0.02	0.01	0.001	=0.15g fortification
0.01	0.02	0.07	0.26		0.2	0.26	0.07	0.02	0.01
0.01	0.04	0.16	0.43		0.3	0.43	0.16	0.04	0.01
0.02	0.07	0.26	0.56		0.4	0.56	0.26	0.07	0.02
0.03	0.12	0.36	0.67		0.5	0.67	0.36	0.12	0.03
0.04	0.17	0.44	0.74		0.6	0.74	0.44	0.17	0.04
0.06	0.21	0.51	0.8		0.7	0.8	0.51	0.21	0.06
0.08	0.27	0.57	0.84		0.8	0.84	0.57	0.27	0.08
0.1	0.31	0.63	0.87		0.9	0.87	0.63	0.31	0.1
0.12	0.36	0.67	0.9		1	0.9	0.67	0.36	0.12
0.001	0.004	0.015	0.05		0.1	0.05	0.015	0.004	0.001	=0.2g fortification				high fortification
0.001	0.009	0.05	0.21		0.2	0.21	0.05	0.009	0.001
0.01	0.03	0.13	0.37		0.3	0.37	0.13	0.03	0.01
0.01	0.06	0.22	0.51		0.4	0.51	0.22	0.06	0.01
0.02	0.09	0.3	0.61		0.5	0.61	0.3	0.09	0.02
0.02	0.13	0.38	0.7		0.6	0.7	0.38	0.13	0.02
0.04	0.18	0.45	0.76		0.7	0.76	0.45	0.18	0.04
0.06	0.21	0.51	0.81		0.8	0.81	0.51	0.21	0.06
0.07	0.26	0.57	0.84		0.9	0.84	0.57	0.26	0.07
0.09	0.31	0.62	0.87		1	0.87	0.62	0.31	0.09
0.001	0.001	0.01	0.037		0.1	0.037	0.01	0.001	0.001	=0.3g fortification
0.002	0.002	0.03	0.17		0.2	0.17	0.03	0.002	0.002
0.003	0.02	0.09	0.31		0.3	0.31	0.09	0.02	0.003
0.01	0.04	0.17	0.45		0.4	0.45	0.17	0.04	0.01
0.01	0.06	0.24	0.55		0.5	0.55	0.24	0.06	0.01
0.02	0.1	0.32	0.64		0.6	0.64	0.32	0.1	0.02
0.03	0.13	0.39	0.71		0.7	0.71	0.39	0.13	0.03
0.04	0.17	0.45	0.76		0.8	0.76	0.45	0.17	0.04
0.05	0.21	0.5	0.8		0.9	0.8	0.5	0.21	0.05
0.06	0.24	0.56	0.83		1	0.83	0.56	0.24	0.06
0.001	0.002	0.004	0.028		0.1	0.028	0.004	0.002	0.001	≥0.4g fortification
0.002	0.007	0.03	0.13		0.2	0.13	0.03	0.007	0.002
0.005	0.01	0.07	0.27		0.3	0.27	0.07	0.01	0.005
0.01	0.03	0.13	0.39		0.4	0.39	0.13	0.03	0.01
0.01	0.05	0.2	0.49		0.5	0.49	0.2	0.05	0.01
0.02	0.07	0.27	0.58		0.6	0.58	0.27	0.07	0.02
0.02	0.1	0.33	0.65		0.7	0.65	0.33	0.1	0.02
0.03	0.13	0.39	0.71		0.8	0.71	0.39	0.13	0.03
0.04	0.17	0.45	0.75		0.9	0.75	0.45	0.17	0.04
0.05	0.2	0.49	0.79		1	0.79	0.49	0.2	0.05
0	0.00303951	0.00303951	0.00303951		0.05	0.00303951	0.00303951	0.00303951	0	DHA method, high fortification RC-core wall	PGA	Liu Juan, master	2014	high fortification
0.00303951	0.00607903	0.00303951	0.00911854		0.1	0.00911854	0.00303951	0.00607903	0.00303951
0.00607903	0.00607903	0.00607903	0.0607903		0.15	0.0607903	0.00607903	0.00607903	0.00607903
0.00607903	0.00911854	0.0303951	0.176292		0.2	0.176292	0.0303951	0.00911854	0.00607903
0.00607903	0.00911854	0.0851064	0.337386		0.25	0.337386	0.0851064	0.00911854	0.00607903
0.00607903	0.0212766	0.173252	0.49848		0.3	0.49848	0.173252	0.0212766	0.00607903
0.00607903	0.0455927	0.267477	0.620061		0.35	0.620061	0.267477	0.0455927	0.00607903
0.0151976	0.0911854	0.370821	0.729483		0.4	0.729483	0.370821	0.0911854	0.0151976
0.0243161	0.136778	0.474164	0.808511		0.45	0.808511	0.474164	0.136778	0.0243161
0.0455927	0.194529	0.56535	0.863222		0.5	0.863222	0.56535	0.194529	0.0455927
0.0699088	0.255319	0.650456	0.902736		0.55	0.902736	0.650456	0.255319	0.0699088
0.100304	0.319149	0.714286	0.933131		0.6	0.933131	0.714286	0.319149	0.100304
0.136778	0.382979	0.765957	0.954407		0.65	0.954407	0.765957	0.382979	0.136778
0.173252	0.452888	0.81459	0.966565		0.7	0.966565	0.81459	0.452888	0.173252
0.215805	0.510638	0.851064	0.978723		0.75	0.978723	0.851064	0.510638	0.215805
0.255319	0.568389	0.884498	0.984802		0.8	0.984802	0.884498	0.568389	0.255319
0.303951	0.620061	0.905775	0.990881		0.85	0.990881	0.905775	0.620061	0.303951
0.349544	0.665653	0.927052	0.993921		0.9	0.993921	0.927052	0.665653	0.349544
0.00311526	0.00311526	0.00311526	0.00311526		0.05	0.00311526	0.00311526	0.00311526	0.00311526	DHA method, No fortification RC-core wall				low fortification
0.00311526	0.00623053	0.00934579	0.0778816		0.1	0.0778816	0.00934579	0.00623053	0.00311526
0.00311526	0.0124611	0.0965732	0.34891		0.15	0.34891	0.0965732	0.0124611	0.00311526
0.00934579	0.0560748	0.280374	0.65109		0.2	0.65109	0.280374	0.0560748	0.00934579
0.0311526	0.143302	0.482866	0.819315		0.25	0.819315	0.482866	0.143302	0.0311526
0.0809969	0.277259	0.666667	0.915888		0.3	0.915888	0.666667	0.277259	0.0809969
0.155763	0.423676	0.785047	0.959502		0.35	0.959502	0.785047	0.423676	0.155763
0.252336	0.548287	0.872274	0.978193		0.4	0.978193	0.872274	0.548287	0.252336
0.352025	0.663551	0.919003	0.990654		0.45	0.990654	0.919003	0.663551	0.352025
0.451713	0.750779	0.950156	0.990654		0.5	0.990654	0.950156	0.750779	0.451713
0.548287	0.825545	0.965732	0.990654		0.55	0.990654	0.965732	0.825545	0.548287
0.626168	0.872274	0.978193	0.993769		0.6	0.993769	0.978193	0.872274	0.626168
0.70405	0.909657	0.984424	0.996885		0.65	0.996885	0.984424	0.909657	0.70405
0.766355	0.934579	0.987539	0.996885		0.7	0.996885	0.987539	0.934579	0.766355
0.813084	0.953271	0.990654	0.996885		0.75	0.996885	0.990654	0.953271	0.813084
0.850467	0.965732	0.990654	1		0.8	1	0.990654	0.965732	0.850467
0.884735	0.981308	0.993769	1		0.85	1	0.993769	0.981308	0.884735
0.909657	0.984424	0.993769	1		0.9	1	0.993769	0.984424	0.909657
0.00310559	0.00310559	0.00310559	0.00310559	0.0434783	0.0512821	0.00310559	0.00310559	0.00310559	0.00310559	IDA method, 20-storey RC frame-core wall	PGA	Liu Yang, master	2014	middle fortification
0.00621118	0.00310559	0.00310559	0.425466	0.975155	0.100233	0.425466	0.00310559	0.00310559	0.00621118
0.00621118	0.00310559	0.052795	0.953416	0.993789	0.151515	0.953416	0.052795	0.00310559	0.00621118
0.00621118	0.00310559	0.31677	0.990683	0.990683	0.198135	0.990683	0.31677	0.00310559	0.00621118
0.00310559	0.0217391	0.611801	0.990683	0.990683	0.249417	0.990683	0.611801	0.0217391	0.00310559
0.00621118	0.0714286	0.829193	0.990683	0.993789	0.300699	0.990683	0.829193	0.0714286	0.00621118
0.00621118	0.167702	0.934783	0.990683	0.990683	0.34965	0.990683	0.934783	0.167702	0.00621118
0.00310559	0.301242	0.968944	0.990683	0.990683	0.400932	0.990683	0.968944	0.301242	0.00310559
0.00621118	0.450311	0.984472	0.990683	0.990683	0.449883	0.990683	0.984472	0.450311	0.00621118
0.015528	0.580745	0.987578	0.990683	0.993789	0.498834	0.990683	0.987578	0.580745	0.015528
0.0310559	0.695652	0.990683	0.990683	0.990683	0.550117	0.990683	0.990683	0.695652	0.0310559
0.0590062	0.779503	0.993789	0.993789	0.993789	0.599068	0.993789	0.993789	0.779503	0.0590062
0.0900621	0.841615	0.990683	0.990683	0.993789	0.65035	0.990683	0.990683	0.841615	0.0900621
0.139752	0.885093	0.990683	0.993789	0.990683	0.701632	0.993789	0.990683	0.885093	0.139752
0.189441	0.913043	0.993789	0.990683	0.990683	0.750583	0.990683	0.993789	0.913043	0.189441
0.254658	0.934783	0.993789	0.993789	0.990683	0.799534	0.993789	0.993789	0.934783	0.254658
0.313665	0.953416	0.993789	0.990683	0.990683	0.848485	0.990683	0.993789	0.953416	0.313665
0.378882	0.959627	0.990683	0.990683	0.993789	0.899767	0.990683	0.990683	0.959627	0.378882
0.437888	0.968944	0.990683	0.990683	0.990683	0.948718	0.990683	0.990683	0.968944	0.437888
0.496894	0.97205	0.993789	0.990683	0.993789	0.997669	0.990683	0.993789	0.97205	0.496894
0.00280899	0	0	0.140449	0.401685	0.0512821	0.140449	0	0	0.00280899	IDA method, 20-storey RC frame-core wall	SA			middle fortification
0.00280899	0.00280899	0.115169	0.75	0.949438	0.100233	0.75	0.115169	0.00280899	0.00280899
0.00561798	0.0674157	0.410112	0.94382	0.988764	0.151515	0.94382	0.410112	0.0674157	0.00561798
0.00280899	0.176966	0.648876	0.980337	0.994382	0.198135	0.980337	0.648876	0.176966	0.00280899
0.00561798	0.297753	0.780899	0.991573	0.991573	0.249417	0.991573	0.780899	0.297753	0.00561798
0.0393258	0.401685	0.856742	0.991573	0.991573	0.300699	0.991573	0.856742	0.401685	0.0393258
0.103933	0.511236	0.912921	0.991573	0.994382	0.34965	0.991573	0.912921	0.511236	0.103933
0.168539	0.620787	0.946629	0.991573	0.994382	0.400932	0.991573	0.946629	0.620787	0.168539
0.230337	0.699438	0.963483	0.991573	0.994382	0.449883	0.991573	0.963483	0.699438	0.230337
0.300562	0.755618	0.974719	0.994382	0.991573	0.498834	0.994382	0.974719	0.755618	0.300562
0.359551	0.800562	0.980337	0.991573	0.991573	0.550117	0.991573	0.980337	0.800562	0.359551
0.412921	0.839888	0.985955	0.991573	0.997191	0.599068	0.991573	0.985955	0.839888	0.412921
0.466292	0.873596	0.985955	0.994382	0.991573	0.65035	0.994382	0.985955	0.873596	0.466292
0.516854	0.901685	0.988764	0.991573	0.994382	0.701632	0.991573	0.988764	0.901685	0.516854
0.567416	0.921348	0.991573	0.991573	0.991573	0.750583	0.991573	0.991573	0.921348	0.567416
0.609551	0.935393	0.991573	0.991573	0.991573	0.799534	0.991573	0.991573	0.935393	0.609551
0.651685	0.946629	0.994382	0.991573	0.991573	0.848485	0.991573	0.994382	0.946629	0.651685
0.682584	0.957865	0.994382	0.991573	0.991573	0.899767	0.991573	0.994382	0.957865	0.682584
0.710674	0.963483	0.994382	0.991573	0.991573	0.948718	0.991573	0.994382	0.963483	0.710674
0.735955	0.969101	0.994382	0.991573	0.994382	0.997669	0.991573	0.994382	0.969101	0.735955
0.00881057	0.00881057	0.0132159	0.202643		0.0512821	0.202643	0.0132159	0.00881057	0.00881057	IDA method, newly built	PGA	Sun, PhD	2016	high fortification
0.00881057	0.00881057	0.140969	0.647577		0.100233	0.647577	0.140969	0.00881057	0.00881057
0.00881057	0.0176211	0.356828	0.859031		0.151515	0.859031	0.356828	0.0176211	0.00881057
0.00881057	0.0572687	0.555066	0.942731		0.198135	0.942731	0.555066	0.0572687	0.00881057
0.00881057	0.110132	0.700441	0.977974		0.249417	0.977974	0.700441	0.110132	0.00881057
0.00881057	0.189427	0.801762	0.991189		0.300699	0.991189	0.801762	0.189427	0.00881057
0.0176211	0.259912	0.863436	0.995595		0.34965	0.995595	0.863436	0.259912	0.0176211
0.0264317	0.343612	0.911894	0.995595		0.400932	0.995595	0.911894	0.343612	0.0264317
0.0396476	0.414097	0.938326	0.995595		0.449883	0.995595	0.938326	0.414097	0.0396476
0.0572687	0.488987	0.960352	0.995595		0.498834	0.995595	0.960352	0.488987	0.0572687
0.0792952	0.555066	0.969163	0.995595		0.550117	0.995595	0.969163	0.555066	0.0792952
0.101322	0.60793	0.977974	0.995595		0.599068	0.995595	0.977974	0.60793	0.101322
0.127753	0.656388	0.986784	0.995595		0.65035	0.995595	0.986784	0.656388	0.127753
0.15859	0.704846	0.986784	0.995595		0.701632	0.995595	0.986784	0.704846	0.15859
0.185022	0.748899	0.991189	0.995595		0.750583	0.995595	0.991189	0.748899	0.185022
0.215859	0.779736	0.995595	0.995595		0.799534	0.995595	0.995595	0.779736	0.215859
0.246696	0.810573	0.995595	0.995595		0.848485	0.995595	0.995595	0.810573	0.246696
0.281938	0.837004	0.995595	0.995595		0.899767	0.995595	0.995595	0.837004	0.281938
0.317181	0.859031	0.995595	0.995595		0.948718	0.995595	0.995595	0.859031	0.317181
0.343612	0.876652	0.995595	0.995595		0.997669	0.995595	0.995595	0.876652	0.343612
0.00687285	0.00684932	0.0137457	0.19244		0.0512821	0.19244	0.0137457	0.00684932	0.00687285	IDA method, built 30 years ago				middle fortification
0.00687285	0.00342466	0.171821	0.701031		0.100233	0.701031	0.171821	0.00342466	0.00687285
0.00687285	0.0171233	0.402062	0.90378		0.151515	0.90378	0.402062	0.0171233	0.00687285
0.0103093	0.0616438	0.642612	0.969072		0.198135	0.969072	0.642612	0.0616438	0.0103093
0.00687285	0.136986	0.786942	0.993127		0.249417	0.993127	0.786942	0.136986	0.00687285
0.0137457	0.226027	0.872852	0.993127		0.300699	0.993127	0.872852	0.226027	0.0137457
0.0206186	0.321918	0.927835	0.993127		0.34965	0.993127	0.927835	0.321918	0.0206186
0.0343643	0.417808	0.962199	0.996564		0.400932	0.996564	0.962199	0.417808	0.0343643
0.0515464	0.506849	0.972509	0.996564		0.449883	0.996564	0.972509	0.506849	0.0515464
0.0790378	0.585616	0.982818	0.996564		0.498834	0.996564	0.982818	0.585616	0.0790378
0.103093	0.65411	0.989691	0.996564		0.550117	0.996564	0.989691	0.65411	0.103093
0.137457	0.712329	0.993127	0.996564		0.599068	0.996564	0.993127	0.712329	0.137457
0.175258	0.763699	0.993127	0.996564		0.65035	0.996564	0.993127	0.763699	0.175258
0.213058	0.80137	0.993127	0.996564		0.701632	0.996564	0.993127	0.80137	0.213058
0.257732	0.839041	0.993127	0.996564		0.750583	0.996564	0.993127	0.839041	0.257732
0.302405	0.863014	0.996564	1		0.799534	1	0.996564	0.863014	0.302405
0.340206	0.886986	0.996564	0.996564		0.848485	0.996564	0.996564	0.886986	0.340206
0.378007	0.910959	0.996564	0.996564		0.899767	0.996564	0.996564	0.910959	0.378007
0.42268	0.924658	0.996564	0.996564		0.948718	0.996564	0.996564	0.924658	0.42268
0.460481	0.938356	0.996564	0.996564		0.997669	0.996564	0.996564	0.938356	0.460481
0.00677966	0.00677966	0.0135593	0.183051		0.0512821	0.183051	0.0135593	0.00677966	0.00677966	IDA method, built 40 years ago				low fortification
0.00677966	0.0101695	0.162712	0.698305		0.100233	0.698305	0.162712	0.0101695	0.00677966
0.00677966	0.020339	0.433898	0.911864		0.151515	0.911864	0.433898	0.020339	0.00677966
0.00677966	0.0711864	0.661017	0.972881		0.198135	0.972881	0.661017	0.0711864	0.00677966
0.0101695	0.149153	0.80678	0.989831		0.249417	0.989831	0.80678	0.149153	0.0101695
0.0169492	0.250847	0.898305	0.99322		0.300699	0.99322	0.898305	0.250847	0.0169492
0.0271186	0.355932	0.942373	0.99322		0.34965	0.99322	0.942373	0.355932	0.0271186
0.0474576	0.461017	0.959322	0.99322		0.400932	0.99322	0.959322	0.461017	0.0474576
0.0711864	0.552542	0.979661	0.99322		0.449883	0.99322	0.979661	0.552542	0.0711864
0.105085	0.633898	0.983051	0.99322		0.498834	0.99322	0.983051	0.633898	0.105085
0.145763	0.698305	0.989831	0.99322		0.550117	0.99322	0.989831	0.698305	0.145763
0.186441	0.755932	0.989831	0.99661		0.599068	0.99661	0.989831	0.755932	0.186441
0.237288	0.80339	0.99322	0.99322		0.65035	0.99322	0.99322	0.80339	0.237288
0.284746	0.850847	0.99322	0.99322		0.701632	0.99322	0.99322	0.850847	0.284746
0.332203	0.874576	0.99322	0.99322		0.750583	0.99322	0.99322	0.874576	0.332203
0.376271	0.901695	0.99322	0.99322		0.799534	0.99322	0.99322	0.901695	0.376271
0.430508	0.918644	0.99661	0.99322		0.848485	0.99322	0.99661	0.918644	0.430508
0.471186	0.932203	0.99661	0.99661		0.899767	0.99661	0.99661	0.932203	0.471186
0.508475	0.945763	0.99661	0.99661		0.948718	0.99661	0.99661	0.945763	0.508475
0.549153	0.955932	0.99661	0.99322		0.997669	0.99322	0.99661	0.955932	0.549153
0.00684932	0.00342466	0.00684932	0.167808		0.0512821	0.167808	0.00684932	0.00342466	0.00684932	IDA method, built 50 years ago				low fortification
0.00684932	0.00684932	0.150685	0.712329		0.100233	0.712329	0.150685	0.00684932	0.00684932
0.00684932	0.0171233	0.44863	0.921233		0.151515	0.921233	0.44863	0.0171233	0.00684932
0.00684932	0.0719178	0.674658	0.976027		0.198135	0.976027	0.674658	0.0719178	0.00684932
0.010274	0.160959	0.821918	0.986301		0.249417	0.986301	0.821918	0.160959	0.010274
0.0136986	0.267123	0.900685	0.993151		0.300699	0.993151	0.900685	0.267123	0.0136986
0.0239726	0.386986	0.945205	0.993151		0.34965	0.993151	0.945205	0.386986	0.0239726
0.0376712	0.493151	0.965753	0.993151		0.400932	0.993151	0.965753	0.493151	0.0376712
0.0684932	0.589041	0.979452	0.993151		0.449883	0.993151	0.979452	0.589041	0.0684932
0.10274	0.671233	0.982877	0.993151		0.498834	0.993151	0.982877	0.671233	0.10274
0.14726	0.732877	0.986301	0.996575		0.550117	0.996575	0.986301	0.732877	0.14726
0.191781	0.787671	0.986301	0.996575		0.599068	0.996575	0.986301	0.787671	0.191781
0.236301	0.832192	0.989726	1		0.65035	1	0.989726	0.832192	0.236301
0.280822	0.863014	0.993151	0.996575		0.701632	0.996575	0.993151	0.863014	0.280822
0.332192	0.893836	0.989726	1		0.750583	1	0.989726	0.893836	0.332192
0.390411	0.914384	0.989726	1		0.799534	1	0.989726	0.914384	0.390411
0.434932	0.931507	0.989726	1		0.848485	1	0.989726	0.931507	0.434932
0.486301	0.94863	0.993151	0.996575		0.899767	0.996575	0.993151	0.94863	0.486301
0.527397	0.958904	0.989726	0.996575		0.948718	0.996575	0.989726	0.958904	0.527397
0.568493	0.965753	0.989726	0.996575		0.997669	0.996575	0.989726	0.965753	0.568493
0.00283286	0.00566572	0.0708215	0.974504		0.1	0.974504	0.0708215	0.00566572	0.00283286	capacity spectrum method, 0.05g fortification; 8-storey	SA	Yu et al.	2017	low fortification
0.00283286	0.0396601	0.345609	0.994334		0.2	0.994334	0.345609	0.0396601	0.00283286
0.0113314	0.121813	0.572238	0.994334		0.3	0.994334	0.572238	0.121813	0.0113314
0.0311615	0.232295	0.739377	0.994334		0.4	0.994334	0.739377	0.232295	0.0311615
0.0566572	0.348442	0.838527	0.997167		0.5	0.997167	0.838527	0.348442	0.0566572
0.0934844	0.456091	0.898017	0.997167		0.6	0.997167	0.898017	0.456091	0.0934844
0.141643	0.552408	0.934844	0.997167		0.7	0.997167	0.934844	0.552408	0.141643
0.184136	0.640227	0.957507	0.997167		0.8	0.997167	0.957507	0.640227	0.184136
0.229462	0.708215	0.974504	0.997167		0.9	0.997167	0.974504	0.708215	0.229462
0.27762	0.759207	0.983003	0.997167		1	0.997167	0.983003	0.759207	0.27762
0.325779	0.804533	0.985836	1		1.1	1	0.985836	0.804533	0.325779
0.368272	0.835694	0.991501	1		1.2	1	0.991501	0.835694	0.368272
0.413598	0.869688	0.994334	0.997167		1.3	0.997167	0.994334	0.869688	0.413598
0.456091	0.889518	0.994334	0.997167		1.4	0.997167	0.994334	0.889518	0.456091
0.492918	0.906516	0.994334	0.997167		1.5	0.997167	0.994334	0.906516	0.492918
0.526912	0.926346	0.994334	0.997167		1.6	0.997167	0.994334	0.926346	0.526912
0.560907	0.94051	0.994334	0.997167		1.7	0.997167	0.994334	0.94051	0.560907
0.594901	0.949008	0.994334	0.997167		1.8	0.997167	0.994334	0.949008	0.594901
0.623229	0.954674	0.997167	0.997167		1.9	0.997167	0.997167	0.954674	0.623229
0.648725	0.957507	0.997167	0.997167		2	0.997167	0.997167	0.957507	0.648725
0.00330033	0.00330033	0.039604	0.957096		0.1	0.957096	0.039604	0.00330033	0.00330033	capacity spectrum method, 0.1g fortification; 8-storey				middle fortification
0.00330033	0.0165017	0.227723	0.993399		0.2	0.993399	0.227723	0.0165017	0.00330033
0.00660066	0.0726073	0.458746	0.9967		0.3	0.9967	0.458746	0.0726073	0.00660066
0.0132013	0.161716	0.650165	0.993399		0.4	0.993399	0.650165	0.161716	0.0132013
0.0363036	0.257426	0.775578	0.9967		0.5	0.9967	0.775578	0.257426	0.0363036
0.0627063	0.363036	0.848185	0.993399		0.6	0.993399	0.848185	0.363036	0.0627063
0.0924092	0.462046	0.89769	0.993399		0.7	0.993399	0.89769	0.462046	0.0924092
0.125413	0.547855	0.930693	0.9967		0.8	0.9967	0.930693	0.547855	0.125413
0.168317	0.613861	0.950495	0.993399		0.9	0.993399	0.950495	0.613861	0.168317
0.20462	0.676568	0.963696	0.993399		1	0.993399	0.963696	0.676568	0.20462
0.244224	0.726073	0.973597	0.993399		1.1	0.993399	0.973597	0.726073	0.244224
0.283828	0.768977	0.976898	0.993399		1.2	0.993399	0.976898	0.768977	0.283828
0.323432	0.80198	0.980198	0.993399		1.3	0.993399	0.980198	0.80198	0.323432
0.363036	0.834983	0.983498	0.993399		1.4	0.993399	0.983498	0.834983	0.363036
0.39604	0.858086	0.990099	0.9967		1.5	0.9967	0.990099	0.858086	0.39604
0.429043	0.881188	0.993399	0.993399		1.6	0.993399	0.993399	0.881188	0.429043
0.465347	0.89769	0.9967	0.990099		1.7	0.990099	0.9967	0.89769	0.465347
0.49505	0.917492	0.9967	0.9967		1.8	0.9967	0.9967	0.917492	0.49505
0.528053	0.924092	0.9967	0.9967		1.9	0.9967	0.9967	0.924092	0.528053
0.554455	0.937294	0.9967	0.9967		2	0.9967	0.9967	0.937294	0.554455
0	0.00318471	0.0382166	0.952229		0.125	0.952229	0.0382166	0.00318471	0	capacity spectrum method, 0.2g fortification; 8-storey				high fortification
0.00318471	0.0191083	0.251592	0.990446		0.25	0.990446	0.251592	0.0191083	0.00318471
0.00636943	0.0955414	0.528662	0.990446		0.375	0.990446	0.528662	0.0955414	0.00636943
0.022293	0.207006	0.729299	0.993631		0.5	0.993631	0.729299	0.207006	0.022293
0.0477707	0.33758	0.843949	0.990446		0.625	0.990446	0.843949	0.33758	0.0477707
0.089172	0.464968	0.907643	0.990446		0.75	0.990446	0.907643	0.464968	0.089172
0.136943	0.576433	0.942675	0.996815		0.875	0.996815	0.942675	0.576433	0.136943
0.187898	0.665605	0.961783	0.993631		1	0.993631	0.961783	0.665605	0.187898
0.242038	0.735669	0.977707	0.993631		1.125	0.993631	0.977707	0.735669	0.242038
0.296178	0.792994	0.984076	0.996815		1.25	0.996815	0.984076	0.792994	0.296178
0.350318	0.83758	0.990446	0.996815		1.375	0.996815	0.990446	0.83758	0.350318
0.404459	0.869427	0.993631	0.996815		1.5	0.996815	0.993631	0.869427	0.404459
0.452229	0.894904	0.993631	0.996815		1.625	0.996815	0.993631	0.894904	0.452229
0.5	0.920382	0.993631	0.996815		1.75	0.996815	0.993631	0.920382	0.5
0.544586	0.93949	0.993631	0.993631		1.875	0.993631	0.993631	0.93949	0.544586
0.582803	0.949045	0.996815	0.993631		2	0.993631	0.996815	0.949045	0.582803
0.617834	0.958599	0.993631	0.993631		2.125	0.993631	0.993631	0.958599	0.617834
0.649682	0.964968	0.993631	0.996815		2.25	0.996815	0.993631	0.964968	0.649682
0.678344	0.964968	0.996815	0.993631		2.375	0.993631	0.996815	0.964968	0.678344
0.707006	0.971338	0.996815	0.996815		2.5	0.996815	0.996815	0.971338	0.707006
0.00316456	0.00316456	0.00316456	0.968354		0.125	0.968354	0.00316456	0.00316456	0.00316456	capacity spectrum method, 0.3g fortification; 8-storey				high fortification
0.00316456	0.00316456	0.123418	0.996835		0.25	0.996835	0.123418	0.00316456	0.00316456
0.00316456	0.0253165	0.439873	0.996835		0.375	0.996835	0.439873	0.0253165	0.00316456
0.00632911	0.10443	0.731013	1		0.5	1	0.731013	0.10443	0.00632911
0.0221519	0.25	0.879747	1		0.625	1	0.879747	0.25	0.0221519
0.0474684	0.420886	0.949367	0.996835		0.75	0.996835	0.949367	0.420886	0.0474684
0.085443	0.572785	0.981013	0.996835		0.875	0.996835	0.981013	0.572785	0.085443
0.139241	0.699367	0.993671	1		1	1	0.993671	0.699367	0.139241
0.202532	0.797468	0.996835	1		1.125	1	0.996835	0.797468	0.202532
0.272152	0.870253	0.996835	0.996835		1.25	0.996835	0.996835	0.870253	0.272152
0.341772	0.914557	0.996835	0.996835		1.375	0.996835	0.996835	0.914557	0.341772
0.408228	0.939873	0.993671	0.996835		1.5	0.996835	0.993671	0.939873	0.408228
0.474684	0.968354	0.996835	0.996835		1.625	0.996835	0.996835	0.968354	0.474684
0.537975	0.977848	0.996835	0.996835		1.75	0.996835	0.996835	0.977848	0.537975
0.594937	0.987342	0.996835	0.996835		1.875	0.996835	0.996835	0.987342	0.594937
0.64557	0.993671	0.996835	0.996835		2	0.996835	0.996835	0.993671	0.64557
0.689873	0.996835	0.996835	1		2.125	1	0.996835	0.996835	0.689873
0.734177	0.996835	1	0.996835		2.25	0.996835	1	0.996835	0.734177
0.762658	1	1	0.996835		2.375	0.996835	1	1	0.762658
0.794304	1	0.996835	0.996835		2.5	0.996835	0.996835	1	0.794304
0	0.00323625	0.0841424	0.983819		0.1	0.983819	0.0841424	0.00323625	0	capacity spectrum method, 0.05g fortification; 10-storey				low fortification
0.00323625	0.038835	0.38835	0.990291		0.2	0.990291	0.38835	0.038835	0.00323625
0.00647249	0.12945	0.650485	0.993528		0.3	0.993528	0.650485	0.12945	0.00647249
0.0323625	0.262136	0.805825	0.993528		0.4	0.993528	0.805825	0.262136	0.0323625
0.0582524	0.398058	0.89644	0.993528		0.5	0.993528	0.89644	0.398058	0.0582524
0.0970874	0.517799	0.938511	0.996764		0.6	0.996764	0.938511	0.517799	0.0970874
0.142395	0.614887	0.964401	0.996764		0.7	0.996764	0.964401	0.614887	0.142395
0.194175	0.702265	0.977346	0.996764		0.8	0.996764	0.977346	0.702265	0.194175
0.245955	0.763754	0.987055	0.996764		0.9	0.996764	0.987055	0.763754	0.245955
0.297735	0.815534	0.993528	1		1	1	0.993528	0.815534	0.297735
0.349515	0.857605	0.996764	0.996764		1.1	0.996764	0.996764	0.857605	0.349515
0.391586	0.886731	1	0.996764		1.2	0.996764	1	0.886731	0.391586
0.436893	0.909385	1	1		1.3	1	1	0.909385	0.436893
0.482201	0.925566	0.996764	1		1.4	1	0.996764	0.925566	0.482201
0.521036	0.941748	0.993528	0.996764		1.5	0.996764	0.993528	0.941748	0.521036
0.559871	0.951456	0.996764	0.996764		1.6	0.996764	0.996764	0.951456	0.559871
0.592233	0.961165	0.996764	0.996764		1.7	0.996764	0.996764	0.961165	0.592233
0.624595	0.967638	0.996764	0.996764		1.8	0.996764	0.996764	0.967638	0.624595
0.653722	0.97411	0.996764	0.996764		1.9	0.996764	0.996764	0.97411	0.653722
0.679612	0.977346	0.996764	0.996764		2	0.996764	0.996764	0.977346	0.679612
0.00328947	0.00328947	0.0559211	0.983553		0.1	0.983553	0.0559211	0.00328947	0.00328947	capacity spectrum method, 0.1g fortification; 10-storey				middle fortification
0.00657895	0.0328947	0.351974	0.993421		0.2	0.993421	0.351974	0.0328947	0.00657895
0.00986842	0.111842	0.601974	0.993421		0.3	0.993421	0.601974	0.111842	0.00986842
0.0296053	0.230263	0.779605	0.996711		0.4	0.996711	0.779605	0.230263	0.0296053
0.0526316	0.365132	0.875	0.996711		0.5	0.996711	0.875	0.365132	0.0526316
0.0888158	0.476974	0.924342	0.996711		0.6	0.996711	0.924342	0.476974	0.0888158
0.128289	0.582237	0.960526	0.996711		0.7	0.996711	0.960526	0.582237	0.128289
0.177632	0.667763	0.973684	0.996711		0.8	0.996711	0.973684	0.667763	0.177632
0.223684	0.736842	0.980263	0.996711		0.9	0.996711	0.980263	0.736842	0.223684
0.273026	0.789474	0.990132	0.996711		1	0.996711	0.990132	0.789474	0.273026
0.322368	0.832237	0.993421	0.996711		1.1	0.996711	0.993421	0.832237	0.322368
0.365132	0.871711	0.996711	0.996711		1.2	0.996711	0.996711	0.871711	0.365132
0.414474	0.894737	0.996711	0.996711		1.3	0.996711	0.996711	0.894737	0.414474
0.457237	0.917763	0.996711	0.996711		1.4	0.996711	0.996711	0.917763	0.457237
0.496711	0.930921	0.996711	0.993421		1.5	0.993421	0.996711	0.930921	0.496711
0.536184	0.944079	0.996711	1		1.6	1	0.996711	0.944079	0.536184
0.569079	0.957237	0.996711	1		1.7	1	0.996711	0.957237	0.569079
0.601974	0.963816	0.996711	0.996711		1.8	0.996711	0.996711	0.963816	0.601974
0.631579	0.970395	0.996711	0.996711		1.9	0.996711	0.996711	0.970395	0.631579
0.654605	0.970395	0.993421	0.993421		2	0.993421	0.993421	0.970395	0.654605
0.00664452	0.00332226	0.0996678	0.0996678		0.125	0.0996678	0.0996678	0.00332226	0.00664452	capacity spectrum method, 0.2g fortification; 10-storey				high fortification
0.00664452	0.0498339	0.451827	0.448505		0.25	0.448505	0.451827	0.0498339	0.00664452
0.0166113	0.152824	0.697674	0.697674		0.375	0.697674	0.697674	0.152824	0.0166113
0.0398671	0.302326	0.833887	0.840532		0.5	0.840532	0.833887	0.302326	0.0398671
0.0797342	0.448505	0.916944	0.916944		0.625	0.916944	0.916944	0.448505	0.0797342
0.129568	0.574751	0.950166	0.953488		0.75	0.953488	0.950166	0.574751	0.129568
0.182724	0.671096	0.9701	0.9701		0.875	0.9701	0.9701	0.671096	0.182724
0.232558	0.747508	0.983389	0.983389		1	0.983389	0.983389	0.747508	0.232558
0.295681	0.803987	0.986711	0.986711		1.125	0.986711	0.986711	0.803987	0.295681
0.348837	0.853821	0.993355	0.990033		1.25	0.990033	0.993355	0.853821	0.348837
0.398671	0.883721	0.993355	0.993355		1.375	0.993355	0.993355	0.883721	0.398671
0.448505	0.910299	0.996678	0.996678		1.5	0.996678	0.996678	0.910299	0.448505
0.495017	0.930233	0.996678	0.996678		1.625	0.996678	0.996678	0.930233	0.495017
0.541528	0.946844	0.996678	0.996678		1.75	0.996678	0.996678	0.946844	0.541528
0.581395	0.956811	0.996678	0.996678		1.875	0.996678	0.996678	0.956811	0.581395
0.61794	0.966777	0.996678	0.996678		2	0.996678	0.996678	0.966777	0.61794
0.651163	0.9701	0.996678	0.996678		2.125	0.996678	0.996678	0.9701	0.651163
0.681063	0.976744	1	1		2.25	1	1	0.976744	0.681063
0.710963	0.980066	0.996678	0.996678		2.375	0.996678	0.996678	0.980066	0.710963
0.730897	0.983389	0.996678	0.996678		2.5	0.996678	0.996678	0.983389	0.730897
0.00647249	0.00647249	0.00970874	0.983819		0.125	0.983819	0.00970874	0.00647249	0.00647249	capacity spectrum method, 0.3g fortification; 10-storey				high fortification
0.00647249	0.00647249	0.229773	0.993528		0.25	0.993528	0.229773	0.00647249	0.00647249
0.00647249	0.0647249	0.550162	0.993528		0.375	0.993528	0.550162	0.0647249	0.00647249
0.0161812	0.177994	0.750809	0.993528		0.5	0.993528	0.750809	0.177994	0.0161812
0.038835	0.323625	0.880259	0.996764		0.625	0.996764	0.880259	0.323625	0.038835
0.0711974	0.459547	0.938511	0.996764		0.75	0.996764	0.938511	0.459547	0.0711974
0.116505	0.592233	0.964401	0.996764		0.875	0.996764	0.964401	0.592233	0.116505
0.171521	0.692557	0.980583	0.996764		1	0.996764	0.980583	0.692557	0.171521
0.226537	0.770227	0.987055	0.996764		1.125	0.996764	0.987055	0.770227	0.226537
0.28479	0.828479	0.993528	0.996764		1.25	0.996764	0.993528	0.828479	0.28479
0.343042	0.873786	0.996764	0.996764		1.375	0.996764	0.996764	0.873786	0.343042
0.398058	0.906149	1	0.996764		1.5	0.996764	1	0.906149	0.398058
0.453074	0.928803	0.996764	0.996764		1.625	0.996764	0.996764	0.928803	0.453074
0.501618	0.94822	0.996764	0.996764		1.75	0.996764	0.996764	0.94822	0.501618
0.550162	0.957929	0.996764	0.996764		1.875	0.996764	0.996764	0.957929	0.550162
0.598706	0.967638	1	0.996764		2	0.996764	1	0.967638	0.598706
0.634304	0.97411	1	0.996764		2.125	0.996764	1	0.97411	0.634304
0.669903	0.977346	1	0.996764		2.25	0.996764	1	0.977346	0.669903
0.705502	0.983819	0.996764	0.996764		2.375	0.996764	0.996764	0.983819	0.705502
0.728155	0.990291	0.996764	0.993528		2.5	0.993528	0.996764	0.990291	0.728155
0	0	0	0.0526316		0.1	0.0526316	0	0	0	DHA method, 8-storey, unfortificated, X direction	PGA	Zhu, PhD	2010	no fortification
0.00350877	0	0.333333	0.996491		0.2	0.996491	0.333333	0	0.00350877
0.00350877	0	0.982456	0.992982		0.3	0.992982	0.982456	0	0.00350877
0	0.0140351	0.996491	0.996491		0.4	0.996491	0.996491	0.0140351	0
0	0.294737	0.992982	0.996491		0.5	0.996491	0.992982	0.294737	0
0.00350877	0.726316	0.996491	0.992982		0.6	0.992982	0.996491	0.726316	0.00350877
0	0.947368	0.992982	1		0.7	1	0.992982	0.947368	0
0.0140351	0.992982	1	0.996491		0.8	0.996491	1	0.992982	0.0140351
0.101754	0.992982	1	0.996491		0.9	0.996491	1	0.992982	0.101754
0.291228	0.992982	0.996491	0.996491		1	0.996491	0.996491	0.992982	0.291228
0.536842	0.996491	1	0.996491		1.1	0.996491	1	0.996491	0.536842
0.736842	0.996491	1	0.996491		1.2	0.996491	1	0.996491	0.736842
0.877193	0.996491	0.996491	1		1.3	1	0.996491	0.996491	0.877193
0.954386	0.996491	0.996491	1		1.4	1	0.996491	0.996491	0.954386
0.985965	1	1	1		1.5	1	1	1	0.985965
0.992982	0.992982	0.996491	1		1.6	1	0.996491	0.992982	0.992982
0.996491	0.996491	0.996491	1		1.7	1	0.996491	0.996491	0.996491
0.996491	1	0.996491	1		1.8	1	0.996491	1	0.996491
0.996491	1	1	1		1.9	1	1	1	0.996491
0.996491	0.996491	1	1		2	1	1	0.996491	0.996491
0	0	0	0		0.1	0	0	0	0	DHA method, 8-storey, fortificated, X direction				high fortification
0	0	0.0385965	0.894737		0.2	0.894737	0.0385965	0	0
0	0	0.785965	0.992982		0.3	0.992982	0.785965	0	0
0	0	0.996491	0.996491		0.4	0.996491	0.996491	0	0
0	0.0245614	0.996491	0.992982		0.5	0.992982	0.996491	0.0245614	0
0	0.224561	0.992982	0.992982		0.6	0.992982	0.992982	0.224561	0
0	0.607018	0.996491	0.992982		0.7	0.992982	0.996491	0.607018	0
0	0.873684	0.996491	0.996491		0.8	0.996491	0.996491	0.873684	0
0	0.975439	0.996491	0.996491		0.9	0.996491	0.996491	0.975439	0
0.0245614	0.992982	1	1		1	1	1	0.992982	0.0245614
0.0982456	0.996491	1	1		1.1	1	1	0.996491	0.0982456
0.235088	0.996491	1	0.996491		1.2	0.996491	1	0.996491	0.235088
0.421053	0.996491	0.996491	0.996491		1.3	0.996491	0.996491	0.996491	0.421053
0.624561	0.996491	1	1		1.4	1	1	0.996491	0.624561
0.775439	0.996491	0.996491	0.996491		1.5	0.996491	0.996491	0.996491	0.775439
0.880702	0.996491	0.996491	0.996491		1.6	0.996491	0.996491	0.996491	0.880702
0.947368	0.996491	0.996491	0.996491		1.7	0.996491	0.996491	0.996491	0.947368
0.978947	0.996491	0.996491	0.996491		1.8	0.996491	0.996491	0.996491	0.978947
0.989474	0.996491	0.996491	1		1.9	1	0.996491	0.996491	0.989474
0.996491	0.992982	0.996491	0.996491		2	0.996491	0.996491	0.992982	0.996491
0.00520833	0.00260417	0.00520833	0.158854		0.1	0.158854	0.00520833	0.00260417	0.00520833	DHA method, 8-storey, unfortificated, Y direction				No fortification
0.00520833	0.0078125	0.697917	0.994792		0.2	0.994792	0.697917	0.0078125	0.00520833
0.00520833	0.00520833	0.992188	0.994792		0.3	0.994792	0.992188	0.00520833	0.00520833
0.0078125	0.148438	0.997396	0.992188		0.4	0.992188	0.997396	0.148438	0.0078125
0.00520833	0.669271	0.994792	0.992188		0.5	0.992188	0.994792	0.669271	0.00520833
0.0078125	0.950521	0.997396	0.994792		0.6	0.994792	0.997396	0.950521	0.0078125
0.0286458	0.994792	0.997396	0.997396		0.7	0.997396	0.997396	0.994792	0.0286458
0.145833	0.997396	1	0.997396		0.8	0.997396	1	0.997396	0.145833
0.395833	0.994792	0.997396	0.997396		0.9	0.997396	0.997396	0.994792	0.395833
0.664062	0.994792	0.997396	0.997396		1	0.997396	0.997396	0.994792	0.664062
0.859375	0.994792	0.997396	0.997396		1.1	0.997396	0.997396	0.994792	0.859375
0.950521	0.997396	0.994792	0.997396		1.2	0.997396	0.994792	0.997396	0.950521
0.984375	0.997396	0.997396	0.997396		1.3	0.997396	0.997396	0.997396	0.984375
0.997396	0.997396	0.997396	0.997396		1.4	0.997396	0.997396	0.997396	0.997396
0.997396	0.992188	0.994792	0.994792		1.5	0.994792	0.994792	0.992188	0.997396
0.997396	0.997396	0.994792	0.997396		1.6	0.997396	0.994792	0.997396	0.997396
0.997396	0.997396	0.997396	0.997396		1.7	0.997396	0.997396	0.997396	0.997396
0.997396	0.997396	0.997396	0.994792		1.8	0.994792	0.997396	0.997396	0.997396
0.997396	0.992188	0.994792	0.992188		1.9	0.992188	0.994792	0.992188	0.997396
0.997396	0.992188	0.997396	0.994792		2	0.994792	0.997396	0.992188	0.997396
0.00260417	0.00260417	0.00260417	0.00260417		0.1	0.00260417	0.00260417	0.00260417	0.00260417	DHA method, 8-storey, fortificated, Y direction				low/moderate/unspecified fortification
0.00260417	0.00260417	0.09375	0.966146		0.2	0.966146	0.09375	0.00260417	0.00260417
0.00260417	0.00520833	0.914062	0.994792		0.3	0.994792	0.914062	0.00520833	0.00260417
0.00520833	0.00520833	0.992188	0.997396		0.4	0.997396	0.992188	0.00520833	0.00520833
0.00260417	0.0911458	0.992188	0.994792		0.5	0.994792	0.992188	0.0911458	0.00260417
0.00260417	0.453125	0.992188	0.997396		0.6	0.997396	0.992188	0.453125	0.00260417
0.00520833	0.799479	0.997396	0.997396		0.7	0.997396	0.997396	0.799479	0.00520833
0.0078125	0.960938	0.997396	0.994792		0.8	0.994792	0.997396	0.960938	0.0078125
0.0234375	0.989583	0.994792	0.997396		0.9	0.997396	0.994792	0.989583	0.0234375
0.0859375	0.992188	0.992188	0.997396		1	0.997396	0.992188	0.992188	0.0859375
0.229167	0.994792	0.992188	0.992188		1.1	0.992188	0.992188	0.994792	0.229167
0.445312	0.997396	0.992188	0.994792		1.2	0.994792	0.992188	0.997396	0.445312
0.651042	0.997396	0.992188	0.997396		1.3	0.997396	0.992188	0.997396	0.651042
0.807292	0.997396	0.992188	0.997396		1.4	0.997396	0.992188	0.997396	0.807292
0.914062	0.997396	0.992188	0.992188		1.5	0.992188	0.992188	0.997396	0.914062
0.960938	0.997396	0.997396	0.997396		1.6	0.997396	0.997396	0.997396	0.960938
0.979167	0.997396	0.994792	0.997396		1.7	0.997396	0.994792	0.997396	0.979167
0.984375	0.997396	0.997396	0.997396		1.8	0.997396	0.997396	0.997396	0.984375
0.992188	0.997396	0.994792	0.997396		1.9	0.997396	0.994792	0.997396	0.992188
0.997396	0.997396	0.994792	0.997396		2	0.997396	0.994792	0.997396	0.997396
0.00506329	0.00253165	0.00506329	0.00506329		0.075	0.00506329	0.00506329	0.00253165	0.00506329	DHA method, fortificated, X direction				high fortification
0.00253165	0.00506329	0	0.313924		0.15	0.313924	0	0.00506329	0.00253165
0	0.00253165	0.162025	0.967089		0.225	0.967089	0.162025	0.00253165	0
0	0.00506329	0.792405	0.997468		0.3	0.997468	0.792405	0.00506329	0
0.00253165	0.00506329	0.982278	0.997468		0.375	0.997468	0.982278	0.00506329	0.00253165
0.00253165	0.00506329	0.994937	0.994937		0.45	0.994937	0.994937	0.00506329	0.00253165
0	0.0582278	0.997468	0.994937		0.525	0.994937	0.997468	0.0582278	0
0.00253165	0.243038	0.994937	0.997468		0.6	0.997468	0.994937	0.243038	0.00253165
0.00506329	0.526582	0.994937	0.994937		0.675	0.994937	0.994937	0.526582	0.00506329
0.00506329	0.76962	0.994937	0.994937		0.75	0.994937	0.994937	0.76962	0.00506329
0.00253165	0.913924	0.994937	0.997468		0.825	0.997468	0.994937	0.913924	0.00253165
0.00253165	0.972152	0.997468	0.997468		0.9	0.997468	0.997468	0.972152	0.00253165
0.0202532	0.989873	0.994937	0.997468		0.975	0.997468	0.994937	0.989873	0.0202532
0.0607595	0.994937	0.997468	0.997468		1.05	0.997468	0.997468	0.994937	0.0607595
0.131646	0.994937	0.997468	0.997468		1.125	0.997468	0.997468	0.994937	0.131646
0.248101	0.997468	0.997468	0.997468		1.2	0.997468	0.997468	0.997468	0.248101
0.389873	0.994937	0.997468	0.994937		1.275	0.994937	0.997468	0.994937	0.389873
0.536709	0.997468	0.997468	0.997468		1.35	0.997468	0.997468	0.997468	0.536709
0.678481	0.997468	1	0.997468		1.425	0.997468	1	0.997468	0.678481
0.779747	0.994937	0.994937	0.997468		1.5	0.997468	0.994937	0.994937	0.779747
0.00253165	0.00253165	0.00253165	0.00253165		0.075	0.00253165	0.00253165	0.00253165	0.00253165	DHA method, fortificated, X direction, frame-shear wall				high fortification
0.00253165	0.00506329	0	0.131646		0.15	0.131646	0	0.00506329	0.00253165
0.00506329	0.00506329	0.0455696	0.896203		0.225	0.896203	0.0455696	0.00506329	0.00506329
0.00253165	0.00506329	0.559494	0.992405		0.3	0.992405	0.559494	0.00506329	0.00253165
0.00253165	0.00506329	0.936709	0.994937		0.375	0.994937	0.936709	0.00506329	0.00253165
0	0.00506329	0.994937	0.997468		0.45	0.997468	0.994937	0.00506329	0
0	0.0151899	0.997468	0.992405		0.525	0.992405	0.997468	0.0151899	0
0.00506329	0.0911392	0.997468	0.994937		0.6	0.994937	0.997468	0.0911392	0.00506329
0.00506329	0.286076	0.994937	0.997468		0.675	0.997468	0.994937	0.286076	0.00506329
0.00506329	0.534177	0.994937	0.997468		0.75	0.997468	0.994937	0.534177	0.00506329
0.00253165	0.764557	0.994937	0.992405		0.825	0.992405	0.994937	0.764557	0.00253165
0.00759494	0.906329	0.997468	0.997468		0.9	0.997468	0.997468	0.906329	0.00759494
0.0202532	0.967089	0.997468	0.994937		0.975	0.994937	0.997468	0.967089	0.0202532
0.0607595	0.992405	0.997468	0.997468		1.05	0.997468	0.997468	0.992405	0.0607595
0.136709	0.997468	0.997468	0.994937		1.125	0.994937	0.997468	0.997468	0.136709
0.24557	0.997468	0.997468	0.992405		1.2	0.992405	0.997468	0.997468	0.24557
0.392405	0.992405	0.997468	0.992405		1.275	0.992405	0.997468	0.992405	0.392405
0.536709	0.997468	0.992405	0.992405		1.35	0.992405	0.992405	0.997468	0.536709
0.673418	1	0.997468	0.992405		1.425	0.992405	0.997468	1	0.673418
0.782278	0.997468	0.997468	0.992405		1.5	0.992405	0.997468	0.997468	0.782278
0.00178891	0.00357782	0.00357782	0.00178891		0.075	0.00178891	0.00357782	0.00357782	0.00178891	DHA method, fortificated, Y direction				low/moderate/unspecified fortification
0.00536673	0.00357782	0.00178891	0.168157		0.15	0.168157	0.00178891	0.00357782	0.00536673
0.00357782	0.00536673	0.0679785	0.915921		0.225	0.915921	0.0679785	0.00536673	0.00357782
0.00357782	0.00536673	0.615385	0.996422		0.3	0.996422	0.615385	0.00536673	0.00357782
0.00357782	0.00715564	0.948122	0.996422		0.375	0.996422	0.948122	0.00715564	0.00357782
0.00357782	0.00536673	0.994633	0.996422		0.45	0.996422	0.994633	0.00536673	0.00357782
0.00536673	0.019678	0.998211	0.996422		0.525	0.996422	0.998211	0.019678	0.00536673
0.00178891	0.118068	0.998211	0.996422		0.6	0.996422	0.998211	0.118068	0.00178891
0.00357782	0.322004	0.998211	0.996422		0.675	0.996422	0.998211	0.322004	0.00357782
0.00357782	0.588551	0.994633	0.998211		0.75	0.998211	0.994633	0.588551	0.00357782
0.00178891	0.792487	0.996422	0.996422		0.825	0.996422	0.996422	0.792487	0.00178891
0.00178891	0.91771	0.996422	0.994633		0.9	0.994633	0.996422	0.91771	0.00178891
0.00357782	0.969589	0.998211	0.998211		0.975	0.998211	0.998211	0.969589	0.00357782
0.0178891	0.994633	0.998211	0.996422		1.05	0.996422	0.998211	0.994633	0.0178891
0.0500894	0.996422	0.998211	0.996422		1.125	0.996422	0.998211	0.996422	0.0500894
0.100179	0.996422	0.996422	0.996422		1.2	0.996422	0.996422	0.996422	0.100179
0.194991	0.998211	0.994633	0.998211		1.275	0.998211	0.994633	0.998211	0.194991
0.307692	0.994633	0.998211	0.994633		1.35	0.994633	0.998211	0.994633	0.307692
0.443649	0.998211	0.998211	0.996422		1.425	0.996422	0.998211	0.998211	0.443649
0.568873	0.998211	0.998211	0.998211		1.5	0.998211	0.998211	0.998211	0.568873
0.00178891	0.00357782	0.00178891	0.0483005		0.075	0.0483005	0.00178891	0.00357782	0.00178891	DHA method, fortificated, Y direction, frame-shear wall				low/moderate/unspecified fortification
0.00715564	0.00536673	0.318426	0.985689		0.15	0.985689	0.318426	0.00536673	0.00715564
0.00536673	0.00536673	0.9678	0.998211		0.225	0.998211	0.9678	0.00536673	0.00536673
0.00536673	0.0214669	0.996422	0.996422		0.3	0.996422	0.996422	0.0214669	0.00536673
0.00894454	0.252236	0.998211	0.998211		0.375	0.998211	0.998211	0.252236	0.00894454
0.00894454	0.692308	0.998211	0.998211		0.45	0.998211	0.998211	0.692308	0.00894454
0.00715564	0.928444	0.998211	0.996422		0.525	0.996422	0.998211	0.928444	0.00715564
0.00536673	0.989267	1	1		0.6	1	1	0.989267	0.00536673
0.00715564	0.996422	1	0.996422		0.675	0.996422	1	0.996422	0.00715564
0.0161002	0.996422	0.994633	0.998211		0.75	0.998211	0.994633	0.996422	0.0161002
0.0626118	0.994633	0.998211	0.998211		0.825	0.998211	0.998211	0.994633	0.0626118
0.16458	0.996422	0.998211	0.998211		0.9	0.998211	0.998211	0.996422	0.16458
0.322004	0.992844	0.996422	0.998211		0.975	0.998211	0.996422	0.992844	0.322004
0.506261	0.994633	1	0.998211		1.05	0.998211	1	0.994633	0.506261
0.677996	0.994633	0.998211	0.998211		1.125	0.998211	0.998211	0.994633	0.677996
0.810376	0.996422	1	0.994633		1.2	0.994633	1	0.996422	0.810376
0.90161	0.998211	1	0.998211		1.275	0.998211	1	0.998211	0.90161
0.946333	0.996422	1	0.998211		1.35	0.998211	1	0.996422	0.946333
0.973166	0.996422	1	0.998211		1.425	0.998211	1	0.996422	0.973166
0.991055	0.994633	0.998211	0.998211		1.5	0.998211	0.998211	0.994633	0.991055
0.00986842	0.00986842	0.00986842	0.00986842		0.15	0.00986842	0.00986842	0.00986842	0.00986842	DHA method, 4-storey, unfortificated, X direction	SA			No fortification
0.00657895	0.00986842	0.0361842	0.799342		0.3	0.799342	0.0361842	0.00986842	0.00657895
0.00657895	0.0131579	0.703947	0.993421		0.45	0.993421	0.703947	0.0131579	0.00657895
0.00986842	0.00986842	0.993421	0.993421		0.6	0.993421	0.993421	0.00986842	0.00986842
0.00657895	0.0296053	0.996711	0.993421		0.75	0.993421	0.996711	0.0296053	0.00657895
0.00328947	0.217105	0.996711	0.996711		0.9	0.996711	0.996711	0.217105	0.00328947
0.00328947	0.552632	0.996711	0.993421		1.05	0.993421	0.996711	0.552632	0.00328947
0.00328947	0.845395	0.996711	0.996711		1.2	0.996711	0.996711	0.845395	0.00328947
0.00328947	0.957237	0.993421	1		1.35	1	0.993421	0.957237	0.00328947
0.0230263	0.993421	0.990132	1		1.5	1	0.990132	0.993421	0.0230263
0.0822368	0.993421	0.996711	0.996711		1.65	0.996711	0.996711	0.993421	0.0822368
0.217105	0.996711	0.996711	1		1.8	1	0.996711	0.996711	0.217105
0.391447	0.996711	1	1		1.95	1	1	0.996711	0.391447
0.575658	0.996711	0.996711	1		2.1	1	0.996711	0.996711	0.575658
0.730263	0.996711	0.996711	0.996711		2.25	0.996711	0.996711	0.996711	0.730263
0.851974	1	0.996711	0.996711		2.4	0.996711	0.996711	1	0.851974
0.917763	0.996711	1	1		2.55	1	1	0.996711	0.917763
0.960526	1	1	0.996711		2.7	0.996711	1	1	0.960526
0.980263	1	0.996711	0.996711		2.85	0.996711	0.996711	1	0.980263
0.993421	1	0.996711	0.996711		3	0.996711	0.996711	1	0.993421
0.00986842	0.00986842	0.00657895	0.0131579		0.15	0.0131579	0.00657895	0.00986842	0.00986842	DHA method, 4-storey, fortificated, X direction				low/moderate/unspecified fortification
0.00986842	0.00986842	0.0328947	0.776316		0.3	0.776316	0.0328947	0.00986842	0.00986842
0.00986842	0.0131579	0.555921	0.993421		0.45	0.993421	0.555921	0.0131579	0.00986842
0.00986842	0.00986842	0.970395	0.993421		0.6	0.993421	0.970395	0.00986842	0.00986842
0.00986842	0.0131579	0.993421	0.993421		0.75	0.993421	0.993421	0.0131579	0.00986842
0.00986842	0.118421	0.993421	0.993421		0.9	0.993421	0.993421	0.118421	0.00986842
0.00657895	0.401316	0.993421	0.996711		1.05	0.996711	0.993421	0.401316	0.00657895
0.00657895	0.720395	0.993421	0.996711		1.2	0.996711	0.993421	0.720395	0.00657895
0.00657895	0.914474	0.993421	0.993421		1.35	0.993421	0.993421	0.914474	0.00657895
0.00657895	0.976974	0.996711	0.996711		1.5	0.996711	0.996711	0.976974	0.00657895
0.0361842	0.990132	0.993421	0.996711		1.65	0.996711	0.993421	0.990132	0.0361842
0.111842	0.990132	0.996711	1		1.8	1	0.996711	0.990132	0.111842
0.256579	0.996711	0.996711	0.996711		1.95	0.996711	0.996711	0.996711	0.256579
0.411184	0.993421	0.996711	0.996711		2.1	0.996711	0.996711	0.993421	0.411184
0.585526	0.993421	0.996711	0.996711		2.25	0.996711	0.996711	0.993421	0.585526
0.736842	0.996711	0.993421	0.996711		2.4	0.996711	0.993421	0.996711	0.736842
0.845395	0.996711	0.993421	1		2.55	1	0.993421	0.996711	0.845395
0.917763	0.996711	0.996711	0.996711		2.7	0.996711	0.996711	0.996711	0.917763
0.957237	1	0.993421	0.996711		2.85	0.996711	0.993421	1	0.957237
0.976974	1	0.993421	1		3	1	0.993421	1	0.976974
0.0130719	0.0163399	0.0130719	0.0359477		0.15	0.0359477	0.0130719	0.0163399	0.0130719	DHA method, 4-storey, unfortificated, Y direction				low/moderate/unspecified fortification
0.0163399	0.0130719	0.173203	0.944444		0.3	0.944444	0.173203	0.0130719	0.0163399
0.0163399	0.0130719	0.905229	0.996732		0.45	0.996732	0.905229	0.0130719	0.0163399
0.0130719	0.0163399	0.993464	0.996732		0.6	0.996732	0.993464	0.0163399	0.0130719
0.0130719	0.156863	0.996732	0.993464		0.75	0.993464	0.996732	0.156863	0.0130719
0.0130719	0.51634	0.996732	0.993464		0.9	0.993464	0.996732	0.51634	0.0130719
0.00980392	0.859477	0.996732	0.996732		1.05	0.996732	0.996732	0.859477	0.00980392
0.00980392	0.970588	0.996732	1		1.2	1	0.996732	0.970588	0.00980392
0.0424837	0.993464	0.996732	0.996732		1.35	0.996732	0.996732	0.993464	0.0424837
0.140523	0.993464	0.996732	1		1.5	1	0.996732	0.993464	0.140523
0.310458	0.996732	0.996732	1		1.65	1	0.996732	0.996732	0.310458
0.522876	0.996732	0.996732	1		1.8	1	0.996732	0.996732	0.522876
0.715686	0.996732	0.996732	0.996732		1.95	0.996732	0.996732	0.996732	0.715686
0.852941	0.996732	0.996732	1		2.1	1	0.996732	0.996732	0.852941
0.928105	0.996732	0.996732	1		2.25	1	0.996732	0.996732	0.928105
0.96732	0.993464	0.996732	1		2.4	1	0.996732	0.993464	0.96732
0.98366	0.996732	0.996732	1		2.55	1	0.996732	0.996732	0.98366
0.990196	0.996732	1	1		2.7	1	1	0.996732	0.990196
0.996732	0.996732	1	1		2.85	1	1	0.996732	0.996732
1	0.993464	1	0.996732		3	0.996732	1	0.993464	1
0.00980392	0.00980392	0.00980392	0.0130719		0.15	0.0130719	0.00980392	0.00980392	0.00980392	DHA method, 4-storey, fortificated, Y direction				low/moderate/unspecified fortification
0.0130719	0.00980392	0.0228758	0.584967		0.3	0.584967	0.0228758	0.00980392	0.0130719
0.0130719	0.00980392	0.437908	0.996732		0.45	0.996732	0.437908	0.00980392	0.0130719
0.0130719	0.00980392	0.941176	1		0.6	1	0.941176	0.00980392	0.0130719
0.0130719	0.00980392	0.993464	0.996732		0.75	0.996732	0.993464	0.00980392	0.0130719
0.0130719	0.0686275	0.993464	1		0.9	1	0.993464	0.0686275	0.0130719
0.0130719	0.297386	0.996732	1		1.05	1	0.996732	0.297386	0.0130719
0.0130719	0.611111	0.993464	1		1.2	1	0.993464	0.611111	0.0130719
0.00980392	0.856209	0.996732	1		1.35	1	0.996732	0.856209	0.00980392
0.00980392	0.954248	0.993464	0.996732		1.5	0.996732	0.993464	0.954248	0.00980392
0.0196078	0.990196	0.993464	1		1.65	1	0.993464	0.990196	0.0196078
0.0555556	0.993464	0.996732	1		1.8	1	0.996732	0.993464	0.0555556
0.143791	1	0.996732	1		1.95	1	0.996732	1	0.143791
0.267974	0.996732	0.996732	1		2.1	1	0.996732	0.996732	0.267974
0.428105	0.996732	0.996732	1		2.25	1	0.996732	0.996732	0.428105
0.591503	0.996732	1	0.996732		2.4	0.996732	1	0.996732	0.591503
0.745098	0.996732	0.996732	0.996732		2.55	0.996732	0.996732	0.996732	0.745098
0.852941	0.996732	1	0.996732		2.7	0.996732	1	0.996732	0.852941
0.901961	0.996732	1	0.996732		2.85	0.996732	1	0.996732	0.901961
0.95098	1	1	0.996732		3	0.996732	1	1	0.95098
0.00249377	0	0.00249377	0		0.1	0	0.00249377	0	0.00249377	DHA method, 6-storey, unfortificated, X direction				low/moderate/unspecified fortification
0	0	0.0249377	0.922693		0.2	0.922693	0.0249377	0	0
0.00249377	0	0.765586	0.995012		0.3	0.995012	0.765586	0	0.00249377
0.00498753	0.00249377	0.992519	0.997506		0.4	0.997506	0.992519	0.00249377	0.00498753
0.00249377	0.0149626	0.992519	0.995012		0.5	0.995012	0.992519	0.0149626	0.00249377
0	0.17207	0.997506	0.997506		0.6	0.997506	0.997506	0.17207	0
0.00249377	0.513716	0.997506	0.997506		0.7	0.997506	0.997506	0.513716	0.00249377
0.00249377	0.815461	0.997506	0.997506		0.8	0.997506	0.997506	0.815461	0.00249377
0.00249377	0.952618	0.997506	0.997506		0.9	0.997506	0.997506	0.952618	0.00249377
0.0249377	0.990025	0.997506	0.995012		1	0.995012	0.997506	0.990025	0.0249377
0.0897756	0.992519	0.997506	0.997506		1.1	0.997506	0.997506	0.992519	0.0897756
0.23192	0.995012	0.995012	0.997506		1.2	0.997506	0.995012	0.995012	0.23192
0.408978	0.992519	0.995012	0.995012		1.3	0.995012	0.995012	0.992519	0.408978
0.608479	0.995012	0.995012	0.995012		1.4	0.995012	0.995012	0.995012	0.608479
0.755611	0.992519	0.997506	0.995012		1.5	0.995012	0.997506	0.992519	0.755611
0.870324	0.992519	0.997506	0.995012		1.6	0.995012	0.997506	0.992519	0.870324
0.935162	0.995012	0.995012	0.995012		1.7	0.995012	0.995012	0.995012	0.935162
0.972569	0.997506	0.997506	0.995012		1.8	0.995012	0.997506	0.997506	0.972569
0.987531	1	0.997506	0.995012		1.9	0.995012	0.997506	1	0.987531
0.995012	1	0.997506	0.997506		2	0.997506	0.997506	1	0.995012
0.00249377	0.00249377	0	0.00249377		0.1	0.00249377	0	0.00249377	0.00249377	DHA method, 6-storey, fortificated, X direction				missing out
0.00498753	0.00249377	0.00249377	0.922693		0.2	0.922693	0.00249377	0.00249377	0.00498753
0.00498753	0.00498753	0.628429	0.997506		0.3	0.997506	0.628429	0.00498753	0.00498753
0.00249377	0.00498753	0.982544	0.995012		0.4	0.995012	0.982544	0.00498753	0.00249377
0.00249377	0.00498753	0.992519	0.995012		0.5	0.995012	0.992519	0.00498753	0.00249377
0.00498753	0.0947631	0.995012	0.995012		0.6	0.995012	0.995012	0.0947631	0.00498753
0.00498753	0.38404	0.995012	0.995012		0.7	0.995012	0.995012	0.38404	0.00498753
0.00498753	0.708229	0.997506	0.995012		0.8	0.995012	0.997506	0.708229	0.00498753
0.00498753	0.915212	0.997506	0.997506		0.9	0.997506	0.997506	0.915212	0.00498753
0.00997506	0.977556	0.997506	0.997506		1	0.997506	0.997506	0.977556	0.00997506
0.0448878	0.992519	0.997506	0.997506		1.1	0.997506	0.997506	0.992519	0.0448878
0.134663	0.997506	0.997506	0.997506		1.2	0.997506	0.997506	0.997506	0.134663
0.289277	0.997506	0.997506	0.997506		1.3	0.997506	0.997506	0.997506	0.289277
0.46384	0.992519	0.995012	0.997506		1.4	0.997506	0.995012	0.992519	0.46384
0.633416	0.997506	0.995012	0.995012		1.5	0.995012	0.995012	0.997506	0.633416
0.778055	0.997506	0.997506	0.997506		1.6	0.997506	0.997506	0.997506	0.778055
0.877805	0.997506	0.995012	0.997506		1.7	0.997506	0.995012	0.997506	0.877805
0.935162	0.997506	0.997506	0.997506		1.8	0.997506	0.997506	0.997506	0.935162
0.967581	0.997506	0.997506	0.997506		1.9	0.997506	0.997506	0.997506	0.967581
0.985037	0.997506	0.997506	0.997506		2	0.997506	0.997506	0.997506	0.985037
0.00411523	0.00411523	0.00411523	0.0144033		0.1	0.0144033	0.00411523	0.00411523	0.00411523	DHA method, 6-storey, unfortificated, Y direction				No fortification
0.00617284	0.00617284	0.251029	0.979424		0.2	0.979424	0.251029	0.00617284	0.00617284
0.00617284	0.00411523	0.958848	0.993827		0.3	0.993827	0.958848	0.00411523	0.00617284
0.00617284	0.0185185	0.995885	0.995885		0.4	0.995885	0.995885	0.0185185	0.00617284
0.00823045	0.220165	0.995885	0.995885		0.5	0.995885	0.995885	0.220165	0.00823045
0.00617284	0.644033	0.995885	0.997942		0.6	0.997942	0.995885	0.644033	0.00617284
0.00205761	0.923868	0.995885	0.995885		0.7	0.995885	0.995885	0.923868	0.00205761
0.0123457	0.985597	0.997942	0.995885		0.8	0.995885	0.997942	0.985597	0.0123457
0.0761317	0.995885	0.997942	0.997942		0.9	0.997942	0.997942	0.995885	0.0761317
0.226337	0.997942	0.997942	1		1	1	0.997942	0.997942	0.226337
0.427984	0.997942	0.997942	1		1.1	1	0.997942	0.997942	0.427984
0.654321	0.997942	0.997942	0.997942		1.2	0.997942	0.997942	0.997942	0.654321
0.825103	0.997942	0.997942	0.997942		1.3	0.997942	0.997942	0.997942	0.825103
0.915638	0.997942	0.997942	0.997942		1.4	0.997942	0.997942	0.997942	0.915638
0.962963	0.997942	0.997942	0.997942		1.5	0.997942	0.997942	0.997942	0.962963
0.983539	1	0.997942	1		1.6	1	0.997942	1	0.983539
0.993827	1	0.995885	0.997942		1.7	0.997942	0.995885	1	0.993827
0.997942	0.997942	0.997942	1		1.8	1	0.997942	0.997942	0.997942
0.995885	0.997942	0.993827	1		1.9	1	0.993827	0.997942	0.995885
0.997942	0.997942	0.997942	1		2	1	0.997942	0.997942	0.997942
0.00205761	0.00205761	0	0.00411523		0.1	0.00411523	0	0.00205761	0.00205761	DHA method, 6-storey, fortificated, Y direction				low/moderate/unspecified fortification
0.00411523	0.00205761	0.0123457	0.802469		0.2	0.802469	0.0123457	0.00205761	0.00411523
0.00617284	0.00411523	0.641975	0.995885		0.3	0.995885	0.641975	0.00411523	0.00617284
0.00205761	0.00411523	0.985597	0.997942		0.4	0.997942	0.985597	0.00411523	0.00205761
0.00411523	0.0144033	0.997942	0.995885		0.5	0.995885	0.997942	0.0144033	0.00411523
0	0.156379	0.997942	1		0.6	1	0.997942	0.156379	0
0.00411523	0.497942	0.997942	0.997942		0.7	0.997942	0.997942	0.497942	0.00411523
0.00617284	0.800412	0.997942	0.995885		0.8	0.995885	0.997942	0.800412	0.00617284
0.00411523	0.944444	0.997942	0.997942		0.9	0.997942	0.997942	0.944444	0.00411523
0.0102881	0.985597	1	1		1	1	1	0.985597	0.0102881
0.0493827	0.995885	0.997942	0.997942		1.1	0.997942	0.997942	0.995885	0.0493827
0.146091	0.995885	0.997942	0.997942		1.2	0.997942	0.997942	0.995885	0.146091
0.290123	0.995885	0.997942	1		1.3	1	0.997942	0.995885	0.290123
0.475309	0.995885	0.993827	1		1.4	1	0.993827	0.995885	0.475309
0.641975	0.995885	0.995885	1		1.5	1	0.995885	0.995885	0.641975
0.779835	0.995885	0.995885	1		1.6	1	0.995885	0.995885	0.779835
0.882716	0.995885	0.997942	1		1.7	1	0.997942	0.995885	0.882716
0.934156	0.99177	0.995885	1		1.8	1	0.995885	0.99177	0.934156
0.969136	0.995885	0.997942	1		1.9	1	0.997942	0.995885	0.969136
0.981481	1	0.997942	0.997942		2	0.997942	0.997942	1	0.981481
0.0018797	0.0037594	0.0018797	0.0018797		0.1	0.0018797	0.0018797	0.0037594	0.0018797	DHA method, 8-storey, unfortificated, X direction				No fortification
0.0018797	0.0018797	0.0620301	0.898496		0.2	0.898496	0.0620301	0.0018797	0.0018797
0.0037594	0.0056391	0.81203	0.994361		0.3	0.994361	0.81203	0.0056391	0.0037594
0.0018797	0.0037594	0.996241	0.994361		0.4	0.994361	0.996241	0.0037594	0.0018797
0.0018797	0.0394737	0.994361	0.996241		0.5	0.996241	0.994361	0.0394737	0.0018797
0.0018797	0.295113	0.996241	0.99812		0.6	0.99812	0.996241	0.295113	0.0018797
0.0037594	0.672932	0.994361	0.996241		0.7	0.996241	0.994361	0.672932	0.0037594
0.0037594	0.896617	0.996241	0.996241		0.8	0.996241	0.996241	0.896617	0.0037594
0.0056391	0.979323	0.99812	0.994361		0.9	0.994361	0.99812	0.979323	0.0056391
0.037594	0.994361	0.99812	0.99812		1	0.99812	0.99812	0.994361	0.037594
0.12218	0.994361	0.996241	0.99812		1.1	0.99812	0.996241	0.994361	0.12218
0.274436	0.996241	0.99812	0.996241		1.2	0.996241	0.99812	0.996241	0.274436
0.473684	0.996241	0.994361	0.99812		1.3	0.99812	0.994361	0.996241	0.473684
0.657895	0.996241	0.994361	1		1.4	1	0.994361	0.996241	0.657895
0.796992	0.99812	0.994361	0.99812		1.5	0.99812	0.994361	0.99812	0.796992
0.894737	0.996241	0.996241	0.99812		1.6	0.99812	0.996241	0.996241	0.894737
0.949248	0.996241	0.996241	0.996241		1.7	0.996241	0.996241	0.996241	0.949248
0.973684	0.99812	0.994361	0.99812		1.8	0.99812	0.994361	0.99812	0.973684
0.988722	0.99812	0.996241	0.99812		1.9	0.99812	0.996241	0.99812	0.988722
0.996241	0.996241	0.996241	0.996241		2	0.996241	0.996241	0.996241	0.996241
0.0018797	0.0018797	0.0037594	0.0018797		0.1	0.0018797	0.0037594	0.0018797	0.0018797	DHA method, 8-storey, fortificated, X direction				high fortification
0.0037594	0.0018797	0.0056391	0.629699		0.2	0.629699	0.0056391	0.0018797	0.0037594
0.0037594	0.0037594	0.503759	0.996241		0.3	0.996241	0.503759	0.0037594	0.0037594
0.0037594	0.0037594	0.954887	0.99812		0.4	0.99812	0.954887	0.0037594	0.0037594
0.0037594	0.0056391	0.992481	0.99812		0.5	0.99812	0.992481	0.0056391	0.0037594
0.0018797	0.0620301	0.99812	0.996241		0.6	0.996241	0.99812	0.0620301	0.0018797
0.0056391	0.291353	0.996241	0.996241		0.7	0.996241	0.996241	0.291353	0.0056391
0.0037594	0.62218	0.99812	0.996241		0.8	0.996241	0.99812	0.62218	0.0037594
0.0056391	0.853383	0.99812	0.99812		0.9	0.99812	0.99812	0.853383	0.0056391
0.0018797	0.962406	1	0.996241		1	0.996241	1	0.962406	0.0018797
0.0112782	0.988722	0.99812	0.994361		1.1	0.994361	0.99812	0.988722	0.0112782
0.0469925	0.99812	0.99812	0.996241		1.2	0.996241	0.99812	0.99812	0.0469925
0.140977	0.996241	0.996241	0.996241		1.3	0.996241	0.996241	0.996241	0.140977
0.278195	0.99812	0.996241	0.996241		1.4	0.996241	0.996241	0.99812	0.278195
0.43797	0.99812	0.994361	0.99812		1.5	0.99812	0.994361	0.99812	0.43797
0.607143	0.99812	0.994361	0.994361		1.6	0.994361	0.994361	0.99812	0.607143
0.742481	0.996241	0.99812	0.996241		1.7	0.996241	0.99812	0.996241	0.742481
0.847744	0.994361	0.99812	0.996241		1.8	0.996241	0.99812	0.994361	0.847744
0.919173	0.994361	0.99812	0.99812		1.9	0.99812	0.99812	0.994361	0.919173
0.953008	0.996241	1	0.99812		2	0.99812	1	0.996241	0.953008
0.00383142	0.00383142	0	0.0344828		0.1	0.0344828	0	0.00383142	0.00383142	DHA method, 8-storey, unfortificated, Y direction				No fortification
0.00383142	0.00574713	0.329502	0.98659		0.2	0.98659	0.329502	0.00574713	0.00383142
0.00574713	0.00766284	0.977011	0.996169		0.3	0.996169	0.977011	0.00766284	0.00574713
0.00766284	0.0268199	0.994253	0.992337		0.4	0.992337	0.994253	0.0268199	0.00766284
0.00574713	0.306513	0.994253	0.996169		0.5	0.996169	0.994253	0.306513	0.00574713
0.00574713	0.741379	0.996169	0.996169		0.6	0.996169	0.996169	0.741379	0.00574713
0.00766284	0.948276	0.994253	0.998084		0.7	0.998084	0.994253	0.948276	0.00766284
0.0268199	0.988506	0.998084	1		0.8	1	0.998084	0.988506	0.0268199
0.12069	0.990421	0.994253	1		0.9	1	0.994253	0.990421	0.12069
0.312261	0.990421	1	1		1	1	1	0.990421	0.312261
0.544061	0.990421	1	1		1.1	1	1	0.990421	0.544061
0.747126	0.990421	1	1		1.2	1	1	0.990421	0.747126
0.87931	0.992337	1	1		1.3	1	1	0.992337	0.87931
0.948276	0.992337	1	1		1.4	1	1	0.992337	0.948276
0.978927	0.990421	1	1		1.5	1	1	0.990421	0.978927
0.988506	0.992337	1	1		1.6	1	1	0.992337	0.988506
0.994253	0.992337	1	1		1.7	1	1	0.992337	0.994253
0.998084	0.992337	1	1		1.8	1	1	0.992337	0.998084
1	0.992337	1	0.998084		1.9	0.998084	1	0.992337	1
1	0.992337	0.998084	1		2	1	0.998084	0.992337	1
0	0	0.00191571	0.00383142		0.1	0.00383142	0.00191571	0	0	DHA method, 8-storey, fortificated, Y direction				low/moderate/unspecified fortification
0.00766284	0.00191571	0.0191571	0.781609		0.2	0.781609	0.0191571	0.00191571	0.00766284
0.00383142	0.00383142	0.653257	0.996169		0.3	0.996169	0.653257	0.00383142	0.00383142
0.00191571	0.00383142	0.980843	0.996169		0.4	0.996169	0.980843	0.00383142	0.00191571
0.00383142	0.0114943	0.992337	1		0.5	1	0.992337	0.0114943	0.00383142
0.00191571	0.14751	0.994253	1		0.6	1	0.994253	0.14751	0.00191571
0.00383142	0.469349	0.994253	0.996169		0.7	0.996169	0.994253	0.469349	0.00383142
0.00574713	0.785441	0.994253	1		0.8	1	0.994253	0.785441	0.00574713
0.00766284	0.942529	0.998084	0.998084		0.9	0.998084	0.998084	0.942529	0.00766284
0.0114943	0.98659	0.996169	1		1	1	0.996169	0.98659	0.0114943
0.0536398	0.992337	0.996169	1		1.1	1	0.996169	0.992337	0.0536398
0.141762	0.992337	0.998084	1		1.2	1	0.998084	0.992337	0.141762
0.289272	0.994253	0.998084	1		1.3	1	0.998084	0.994253	0.289272
0.475096	0.998084	0.998084	0.998084		1.4	0.998084	0.998084	0.998084	0.475096
0.649425	0.996169	1	0.998084		1.5	0.998084	1	0.996169	0.649425
0.783525	0.996169	1	1		1.6	1	1	0.996169	0.783525
0.881226	0.996169	0.998084	1		1.7	1	0.998084	0.996169	0.881226
0.938697	0.996169	0.998084	0.998084		1.8	0.998084	0.998084	0.996169	0.938697
0.971264	0.996169	0.998084	0.998084		1.9	0.998084	0.998084	0.996169	0.971264
0.98659	0.996169	0.996169	0.994253		2	0.994253	0.996169	0.996169	0.98659
0.00372439	0.00744879	0.00744879	0.00744879		0.1	0.00744879	0.00744879	0.00744879	0.00372439	DHA method, fortificated, X direction				high fortification
0.00558659	0.00372439	0.0614525	0.916201		0.2	0.916201	0.0614525	0.00372439	0.00558659
0.00558659	0.00744879	0.867784	0.994413		0.3	0.994413	0.867784	0.00744879	0.00558659
0.00744879	0.00931099	0.994413	0.996276		0.4	0.996276	0.994413	0.00931099	0.00744879
0.00931099	0.0595903	0.998138	0.996276		0.5	0.996276	0.998138	0.0595903	0.00931099
0.00744879	0.363128	1	0.996276		0.6	0.996276	1	0.363128	0.00744879
0.00558659	0.741155	1	0.998138		0.7	0.998138	1	0.741155	0.00558659
0.0111732	0.936685	1	0.996276		0.8	0.996276	1	0.936685	0.0111732
0.0204842	0.986965	0.998138	0.994413		0.9	0.994413	0.998138	0.986965	0.0204842
0.0689013	0.994413	1	0.994413		1	0.994413	1	0.994413	0.0689013
0.188082	0.998138	1	0.990689		1.1	0.990689	1	0.998138	0.188082
0.368715	0.998138	0.998138	0.996276		1.2	0.996276	0.998138	0.998138	0.368715
0.569832	0.998138	0.994413	0.996276		1.3	0.996276	0.994413	0.998138	0.569832
0.756052	0.998138	0.996276	0.998138		1.4	0.998138	0.996276	0.998138	0.756052
0.871508	0.996276	0.998138	0.998138		1.5	0.998138	0.998138	0.996276	0.871508
0.918063	0.992551	1	0.996276		1.6	0.996276	1	0.992551	0.918063
0.962756	0.994413	0.996276	0.998138		1.7	0.998138	0.996276	0.994413	0.962756
0.992551	0.996276	0.996276	0.996276		1.8	0.996276	0.996276	0.996276	0.992551
0.992551	0.998138	0.998138	0.998138		1.9	0.998138	0.998138	0.998138	0.992551
0.994413	0.996276	0.998138	1		2	1	0.998138	0.996276	0.994413
0.00744879	0.00558659	0.00372439	0.00372439		0.1	0.00372439	0.00372439	0.00558659	0.00744879	DHA method, fortificated, X direction, frame-shear wall				high fortification
0.00558659	0.00558659	0.00744879	0.214153		0.2	0.214153	0.00744879	0.00558659	0.00558659
0.00931099	0.00744879	0.0986965	0.964618		0.3	0.964618	0.0986965	0.00744879	0.00931099
0.00372439	0.00744879	0.715084	0.996276		0.4	0.996276	0.715084	0.00744879	0.00372439
0.00931099	0.00744879	0.975791	0.996276		0.5	0.996276	0.975791	0.00744879	0.00931099
0.00931099	0.00931099	0.994413	0.994413		0.6	0.994413	0.994413	0.00931099	0.00931099
0.0111732	0.0409683	0.996276	0.994413		0.7	0.994413	0.996276	0.0409683	0.0111732
0.0111732	0.195531	0.996276	0.998138		0.8	0.998138	0.996276	0.195531	0.0111732
0.0111732	0.47486	0.998138	0.998138		0.9	0.998138	0.998138	0.47486	0.0111732
0.00931099	0.739292	0.996276	0.996276		1	0.996276	0.996276	0.739292	0.00931099
0.00931099	0.901304	0.996276	0.996276		1.1	0.996276	0.996276	0.901304	0.00931099
0.018622	0.968343	0.994413	0.996276		1.2	0.996276	0.994413	0.968343	0.018622
0.0502793	0.990689	0.994413	0.996276		1.3	0.996276	0.994413	0.990689	0.0502793
0.113594	0.992551	1	0.998138		1.4	0.998138	1	0.992551	0.113594
0.232775	0.996276	0.998138	0.996276		1.5	0.996276	0.998138	0.996276	0.232775
0.379888	0.996276	1	0.998138		1.6	0.998138	1	0.996276	0.379888
0.532588	0.996276	1	0.996276		1.7	0.996276	1	0.996276	0.532588
0.67784	0.998138	1	0.994413		1.8	0.994413	1	0.998138	0.67784
0.793296	0.996276	1	0.994413		1.9	0.994413	1	0.996276	0.793296
0.869646	0.998138	1	1		2	1	1	0.998138	0.869646
0.00368324	0.00736648	0.00184162	0.00368324		0.1	0.00368324	0.00184162	0.00736648	0.00368324	DHA method, fortificated, Y direction				low/moderate/unspecified fortification
0.00368324	0.00368324	0.00184162	0.600368		0.2	0.600368	0.00184162	0.00368324	0.00368324
0.00552486	0.00552486	0.399632	0.994475		0.3	0.994475	0.399632	0.00552486	0.00552486
0.00736648	0.00552486	0.944751	0.996317		0.4	0.996317	0.944751	0.00552486	0.00736648
0.00552486	0.00736648	0.998158	0.996317		0.5	0.996317	0.998158	0.00736648	0.00552486
0.00552486	0.0441989	0.996317	0.996317		0.6	0.996317	0.996317	0.0441989	0.00552486
0.00552486	0.243094	0.994475	1		0.7	1	0.994475	0.243094	0.00552486
0.00368324	0.578269	0.998158	0.996317		0.8	0.996317	0.998158	0.578269	0.00368324
0.00552486	0.837937	0.996317	0.994475		0.9	0.994475	0.996317	0.837937	0.00552486
0.00552486	0.952118	0.996317	0.996317		1	0.996317	0.996317	0.952118	0.00552486
0.0184162	0.987109	0.998158	1		1.1	1	0.998158	0.987109	0.0184162
0.0478821	0.990792	0.998158	0.998158		1.2	0.998158	0.998158	0.990792	0.0478821
0.117864	0.992634	0.998158	1		1.3	1	0.998158	0.992634	0.117864
0.246777	0.996317	1	1		1.4	1	1	0.996317	0.246777
0.410681	0.994475	0.996317	1		1.5	1	0.996317	0.994475	0.410681
0.578269	0.994475	1	1		1.6	1	1	0.994475	0.578269
0.723757	0.994475	0.998158	0.998158		1.7	0.998158	0.998158	0.994475	0.723757
0.836096	0.994475	1	0.996317		1.8	0.996317	1	0.994475	0.836096
0.902394	0.998158	0.996317	0.996317		1.9	0.996317	0.996317	0.998158	0.902394
0.937385	0.996317	0.996317	0.994475		2	0.994475	0.996317	0.996317	0.937385
0.00368324	0.00184162	0.00552486	0.00368324		0.1	0.00368324	0.00552486	0.00184162	0.00368324	DHA method, fortificated, Y direction, frame-shear wall				low/moderate/unspecified fortification
0.00736648	0.00552486	0.0092081	0.598527		0.2	0.598527	0.0092081	0.00552486	0.00736648
0.00736648	0.00552486	0.445672	0.994475		0.3	0.994475	0.445672	0.00552486	0.00736648
0.00552486	0.00552486	0.952118	0.998158		0.4	0.998158	0.952118	0.00552486	0.00552486
0.00368324	0.00736648	0.994475	0.996317		0.5	0.996317	0.994475	0.00736648	0.00368324
0.00552486	0.0460405	0.994475	0.996317		0.6	0.996317	0.994475	0.0460405	0.00552486
0.0092081	0.246777	0.992634	0.994475		0.7	0.994475	0.992634	0.246777	0.0092081
0.00736648	0.574586	0.994475	0.994475		0.8	0.994475	0.994475	0.574586	0.00736648
0.00368324	0.836096	0.994475	0.994475		0.9	0.994475	0.994475	0.836096	0.00368324
0.00552486	0.952118	0.994475	0.996317		1	0.996317	0.994475	0.952118	0.00552486
0.00368324	0.985267	0.992634	0.996317		1.1	0.996317	0.992634	0.985267	0.00368324
0.00368324	0.990792	0.994475	0.994475		1.2	0.994475	0.994475	0.990792	0.00368324
0.00552486	0.990792	0.994475	0.992634		1.3	0.992634	0.994475	0.990792	0.00552486
0.0165746	0.992634	0.994475	0.992634		1.4	0.992634	0.994475	0.992634	0.0165746
0.0423573	0.990792	0.996317	0.992634		1.5	0.992634	0.996317	0.990792	0.0423573
0.0994475	0.98895	0.996317	0.996317		1.6	0.996317	0.996317	0.98895	0.0994475
0.184162	0.98895	0.994475	0.992634		1.7	0.992634	0.994475	0.98895	0.184162
0.300184	0.990792	0.996317	0.994475		1.8	0.994475	0.996317	0.990792	0.300184
0.430939	0.990792	0.998158	0.994475		1.9	0.994475	0.998158	0.990792	0.430939
0.552486	0.998158	1	0.990792		2	0.990792	1	0.998158	0.552486
0	0.00238095	0.00238095	0		0.05	0	0.00238095	0.00238095	0	MIDA method, RC frame-core wall	SA	Zheng & Yang	2015	low/moderate/unspecified fortification
0.00238095	0.00714286	0.00238095	0.0285714		0.1	0.0285714	0.00238095	0.00714286	0.00238095
0.00714286	0.00714286	0.0047619	0.5		0.15	0.5	0.0047619	0.00714286	0.00714286
0.0047619	0.00714286	0	0.961905		0.2	0.961905	0	0.00714286	0.0047619
0.0047619	0.0047619	0.0190476	0.997619		0.25	0.997619	0.0190476	0.0047619	0.0047619
0	0.00714286	0.097619	1		0.3	1	0.097619	0.00714286	0
0.00238095	0.0047619	0.238095	1		0.35	1	0.238095	0.0047619	0.00238095
0.0047619	0.0119048	0.414286	1		0.4	1	0.414286	0.0119048	0.0047619
0.0047619	0.0357143	0.585714	0.997619		0.45	0.997619	0.585714	0.0357143	0.0047619
0.00238095	0.0714286	0.721429	1		0.5	1	0.721429	0.0714286	0.00238095
0.00238095	0.12619	0.830952	0.997619		0.55	0.997619	0.830952	0.12619	0.00238095
0.0119048	0.192857	0.904762	1		0.6	1	0.904762	0.192857	0.0119048
0.0214286	0.261905	0.942857	1		0.65	1	0.942857	0.261905	0.0214286
0.0333333	0.342857	0.969048	0.997619		0.7	0.997619	0.969048	0.342857	0.0333333
0.0547619	0.421429	0.978571	1		0.75	1	0.978571	0.421429	0.0547619
0.0761905	0.504762	0.990476	0.997619		0.8	0.997619	0.990476	0.504762	0.0761905
0.104762	0.57619	0.997619	0.997619		0.85	0.997619	0.997619	0.57619	0.104762
0.135714	0.642857	0.997619	0.997619		0.9	0.997619	0.997619	0.642857	0.135714
0.180952	0.702381	1	0.997619		0.95	0.997619	1	0.702381	0.180952
0.209524	0.747619	1	0.997619		1	0.997619	1	0.747619	0.209524
0	0	0.00348432	0.0522648		0.05	0.0522648	0.00348432	0	0	steel-concrete with floor effect （组合梁方钢管混凝土柱框架结构CB-CFST）	PGA	Liu & Liu	2010	high fortification
0.00348432	0.00348432	0	0.662021		0.1	0.662021	0	0.00348432	0.00348432
0.00348432	0.00348432	0.0313589	0.944251		0.15	0.944251	0.0313589	0.00348432	0.00348432
0.00348432	0.00348432	0.139373	0.989547		0.2	0.989547	0.139373	0.00348432	0.00348432
0.00348432	0	0.341463	0.996516		0.25	0.996516	0.341463	0	0.00348432
0.00348432	0.00348432	0.574913	0.996516		0.3	0.996516	0.574913	0.00348432	0.00348432
0.00348432	0.00696864	0.756098	0.996516		0.35	0.996516	0.756098	0.00696864	0.00348432
0.00348432	0.0174216	0.874564	1		0.4	1	0.874564	0.0174216	0.00348432
0.00348432	0.0418118	0.940767	1		0.45	1	0.940767	0.0418118	0.00348432
0.00696864	0.0766551	0.968641	0.996516		0.5	0.996516	0.968641	0.0766551	0.00696864
0.0139373	0.12892	0.982578	1		0.55	1	0.982578	0.12892	0.0139373
0.0243902	0.198606	0.989547	1		0.6	1	0.989547	0.198606	0.0243902
0.0452962	0.285714	0.993031	0.996516		0.65	0.996516	0.993031	0.285714	0.0452962
0.0627178	0.365854	0.996516	0.996516		0.7	0.996516	0.996516	0.365854	0.0627178
0	0	0	0.0278746		0.05	0.0278746	0	0	0	steel-concrete without floor effect （钢梁方钢管混凝土柱框架结构SB-CFST）				low/moderate/unspecified fortification
0	0	0	0.480836		0.1	0.480836	0	0	0
0	0.00348432	0.0522648	0.843206		0.15	0.843206	0.0522648	0.00348432	0
0.00348432	0.00348432	0.181185	0.965157		0.2	0.965157	0.181185	0.00348432	0.00348432
0.00348432	0.00348432	0.372822	0.996516		0.25	0.996516	0.372822	0.00348432	0.00348432
0.00348432	0.00348432	0.578397	0.996516		0.3	0.996516	0.578397	0.00348432	0.00348432
0.00348432	0.0174216	0.749129	0.996516		0.35	0.996516	0.749129	0.0174216	0.00348432
0.00348432	0.0313589	0.850174	0.996516		0.4	0.996516	0.850174	0.0313589	0.00348432
0.00348432	0.0696864	0.916376	1		0.45	1	0.916376	0.0696864	0.00348432
0.00696864	0.111498	0.95122	0.996516		0.5	0.996516	0.95122	0.111498	0.00696864
0.0174216	0.174216	0.968641	1		0.55	1	0.968641	0.174216	0.0174216
0.0243902	0.240418	0.97561	0.996516		0.6	0.996516	0.97561	0.240418	0.0243902
0.0418118	0.317073	0.982578	0.996516		0.65	0.996516	0.982578	0.317073	0.0418118
0.0627178	0.38676	0.989547	0.996516		0.7	0.996516	0.989547	0.38676	0.0627178
0.00480769	0.00961538	0.00961538	0.00480769		0.05	0.00480769	0.00961538	0.00961538	0.00480769	0.1g fortification	PGA	Gan, master	2009	middle fortification
0.00961538	0.00961538	0.0192308	0.0817308		0.1	0.0817308	0.0192308	0.00961538	0.00961538
0.0192308	0.0288462	0.120192	0.274038		0.15	0.274038	0.120192	0.0288462	0.0192308
0.0192308	0.0673077	0.283654	0.5		0.2	0.5	0.283654	0.0673077	0.0192308
0.0192308	0.144231	0.447115	0.663462		0.25	0.663462	0.447115	0.144231	0.0192308
0.0192308	0.240385	0.591346	0.783654		0.3	0.783654	0.591346	0.240385	0.0192308
0.0144231	0.336538	0.711538	0.865385		0.35	0.865385	0.711538	0.336538	0.0144231
0.0192308	0.442308	0.793269	0.913462		0.4	0.913462	0.793269	0.442308	0.0192308
0.0192308	0.538462	0.846154	0.942308		0.45	0.942308	0.846154	0.538462	0.0192308
0.0240385	0.620192	0.894231	0.961538		0.5	0.961538	0.894231	0.620192	0.0240385
0.0288462	0.692308	0.923077	0.971154		0.55	0.971154	0.923077	0.692308	0.0288462
0.0432692	0.754808	0.947115	0.980769		0.6	0.980769	0.947115	0.754808	0.0432692
0.0625	0.802885	0.951923	0.985577		0.65	0.985577	0.951923	0.802885	0.0625
0.0769231	0.841346	0.961538	0.985577		0.7	0.985577	0.961538	0.841346	0.0769231
0.0961538	0.870192	0.971154	0.990385		0.75	0.990385	0.971154	0.870192	0.0961538
0.125	0.894231	0.975962	0.990385		0.8	0.990385	0.975962	0.894231	0.125
0.144231	0.913462	0.980769	0.995192		0.85	0.995192	0.980769	0.913462	0.144231
0.173077	0.927885	0.985577	0.995192		0.9	0.995192	0.985577	0.927885	0.173077
0.206731	0.9375	0.985577	0.995192		0.95	0.995192	0.985577	0.9375	0.206731
0.240385	0.947115	0.990385	0.995192		1	0.995192	0.990385	0.947115	0.240385
0.264423	0.951923	0.990385	0.995192		1.05	0.995192	0.990385	0.951923	0.264423
0.293269	0.956731	0.985577	0.995192		1.1	0.995192	0.985577	0.956731	0.293269
0.326923	0.961538	0.985577	0.995192		1.15	0.995192	0.985577	0.961538	0.326923
0.360577	0.971154	0.985577	0.995192		1.2	0.995192	0.985577	0.971154	0.360577
0.00806452	0.00806452	0.00403226	0.00403226		0.05	0.00403226	0.00403226	0.00806452	0.00806452	0.15g fortification				middle fortification
0.00806452	0.00806452	0.0120968	0.0403226		0.1	0.0403226	0.0120968	0.00806452	0.00806452
0.00806452	0.00806452	0.0766129	0.193548		0.15	0.193548	0.0766129	0.00806452	0.00806452
0.00806452	0.0282258	0.197581	0.395161		0.2	0.395161	0.197581	0.0282258	0.00806452
0.00806452	0.0806452	0.350806	0.572581		0.25	0.572581	0.350806	0.0806452	0.00806452
0.00806452	0.157258	0.491935	0.709677		0.3	0.709677	0.491935	0.157258	0.00806452
0.00806452	0.258065	0.612903	0.806452		0.35	0.806452	0.612903	0.258065	0.00806452
0.00806452	0.342742	0.709677	0.870968		0.4	0.870968	0.709677	0.342742	0.00806452
0.00806452	0.439516	0.790323	0.91129		0.45	0.91129	0.790323	0.439516	0.00806452
0.0120968	0.532258	0.842742	0.939516		0.5	0.939516	0.842742	0.532258	0.0120968
0.0120968	0.600806	0.887097	0.959677		0.55	0.959677	0.887097	0.600806	0.0120968
0.0201613	0.669355	0.919355	0.975806		0.6	0.975806	0.919355	0.669355	0.0201613
0.0322581	0.729839	0.935484	0.975806		0.65	0.975806	0.935484	0.729839	0.0322581
0.0403226	0.774194	0.955645	0.983871		0.7	0.983871	0.955645	0.774194	0.0403226
0.0524194	0.814516	0.959677	0.987903		0.75	0.987903	0.959677	0.814516	0.0524194
0.0766129	0.846774	0.967742	0.987903		0.8	0.987903	0.967742	0.846774	0.0766129
0.0927419	0.875	0.971774	0.991935		0.85	0.991935	0.971774	0.875	0.0927419
0.112903	0.891129	0.975806	0.995968		0.9	0.995968	0.975806	0.891129	0.112903
0.141129	0.907258	0.979839	0.995968		0.95	0.995968	0.979839	0.907258	0.141129
0.165323	0.927419	0.987903	1		1	1	0.987903	0.927419	0.165323
0.189516	0.935484	0.991935	1		1.05	1	0.991935	0.935484	0.189516
0.21371	0.943548	0.987903	1		1.1	1	0.987903	0.943548	0.21371
0.245968	0.947581	0.991935	0.995968		1.15	0.995968	0.991935	0.947581	0.245968
0.270161	0.959677	0.991935	1		1.2	1	0.991935	0.959677	0.270161
0	0.003367	0	0		0.05	0	0	0.003367	0	0.2g fortification				high fortification
0.003367	0	0.003367	0.023569		0.1	0.023569	0.003367	0	0.003367
0.00673401	0.00673401	0.0505051	0.141414		0.15	0.141414	0.0505051	0.00673401	0.00673401
0.010101	0.013468	0.148148	0.3367		0.2	0.3367	0.148148	0.013468	0.010101
0.00673401	0.0606061	0.289562	0.518519		0.25	0.518519	0.289562	0.0606061	0.00673401
0.00673401	0.121212	0.444444	0.6633		0.3	0.6633	0.444444	0.121212	0.00673401
0.00673401	0.198653	0.552189	0.760943		0.35	0.760943	0.552189	0.198653	0.00673401
0.00673401	0.292929	0.656566	0.838384		0.4	0.838384	0.656566	0.292929	0.00673401
0.00673401	0.383838	0.750842	0.902357		0.45	0.902357	0.750842	0.383838	0.00673401
0.010101	0.47138	0.814815	0.929293		0.5	0.929293	0.814815	0.47138	0.010101
0.013468	0.552189	0.858586	0.952862		0.55	0.952862	0.858586	0.552189	0.013468
0.013468	0.622896	0.895623	0.96633		0.6	0.96633	0.895623	0.622896	0.013468
0.026936	0.693603	0.929293	0.979798		0.65	0.979798	0.929293	0.693603	0.026936
0.03367	0.737374	0.946128	0.989899		0.7	0.989899	0.946128	0.737374	0.03367
0.040404	0.781145	0.956229	0.989899		0.75	0.989899	0.956229	0.781145	0.040404
0.0606061	0.821549	0.962963	0.989899		0.8	0.989899	0.962963	0.821549	0.0606061
0.0740741	0.855219	0.969697	0.996633		0.85	0.996633	0.969697	0.855219	0.0740741
0.0875421	0.878788	0.969697	0.996633		0.9	0.996633	0.969697	0.878788	0.0875421
0.111111	0.89899	0.973064	0.996633		0.95	0.996633	0.973064	0.89899	0.111111
0.13468	0.909091	0.976431	0.996633		1	0.996633	0.976431	0.909091	0.13468
0.161616	0.929293	0.976431	0.996633		1.05	0.996633	0.976431	0.929293	0.161616
0.181818	0.942761	0.979798	0.996633		1.1	0.996633	0.979798	0.942761	0.181818
0.205387	0.949495	0.983165	0.996633		1.15	0.996633	0.983165	0.949495	0.205387
0.228956	0.956229	0.979798	1		1.2	1	0.979798	0.956229	0.228956
0.0112045	0.0112045	0.00840336	0.00560224		0.05	0.00560224	0.00840336	0.0112045	0.0112045	0.3g fortification				high fortification
0.00840336	0.0112045	0.00560224	0.0112045		0.1	0.0112045	0.00560224	0.0112045	0.00840336
0.0112045	0.0112045	0.0140056	0.0532213		0.15	0.0532213	0.0140056	0.0112045	0.0112045
0.0112045	0.0140056	0.0504202	0.154062		0.2	0.154062	0.0504202	0.0140056	0.0112045
0.0140056	0.0168067	0.123249	0.268908		0.25	0.268908	0.123249	0.0168067	0.0140056
0.00840336	0.0364146	0.215686	0.403361		0.3	0.403361	0.215686	0.0364146	0.00840336
0.0140056	0.0672269	0.313725	0.540616		0.35	0.540616	0.313725	0.0672269	0.0140056
0.0140056	0.12605	0.428571	0.647059		0.4	0.647059	0.428571	0.12605	0.0140056
0.0140056	0.173669	0.52381	0.728291		0.45	0.728291	0.52381	0.173669	0.0140056
0.0168067	0.2493	0.605042	0.792717		0.5	0.792717	0.605042	0.2493	0.0168067
0.0196078	0.313725	0.683473	0.845938		0.55	0.845938	0.683473	0.313725	0.0196078
0.0168067	0.37535	0.747899	0.890756		0.6	0.890756	0.747899	0.37535	0.0168067
0.0196078	0.439776	0.789916	0.915966		0.65	0.915966	0.789916	0.439776	0.0196078
0.0196078	0.501401	0.829132	0.929972		0.7	0.929972	0.829132	0.501401	0.0196078
0.0196078	0.563025	0.862745	0.946779		0.75	0.946779	0.862745	0.563025	0.0196078
0.022409	0.610644	0.89916	0.960784		0.8	0.960784	0.89916	0.610644	0.022409
0.0252101	0.661064	0.910364	0.971989		0.85	0.971989	0.910364	0.661064	0.0252101
0.0252101	0.703081	0.929972	0.985994		0.9	0.985994	0.929972	0.703081	0.0252101
0.0336134	0.736695	0.941176	0.991597		0.95	0.991597	0.941176	0.736695	0.0336134
0.0420168	0.770308	0.955182	0.997199		1	0.997199	0.955182	0.770308	0.0420168
0.0504202	0.798319	0.960784	0.997199		1.05	0.997199	0.960784	0.798319	0.0504202
0.0560224	0.831933	0.963585	0.997199		1.1	0.997199	0.963585	0.831933	0.0560224
0.0728291	0.854342	0.969188	1		1.15	1	0.969188	0.854342	0.0728291
0.0812325	0.868347	0.971989	1		1.2	1	0.971989	0.868347	0.0812325
0.00668896	0.00668896	0.00668896	0.00668896		0.05	0.00668896	0.00668896	0.00668896	0.00668896	0.4g fortification				high fortification
0.00668896	0.00668896	0.00668896	0.00668896		0.1	0.00668896	0.00668896	0.00668896	0.00668896
0.00668896	0.00668896	0.00668896	0.00668896		0.15	0.00668896	0.00668896	0.00668896	0.00668896
0.00668896	0.00334448	0.00668896	0.0401338		0.2	0.0401338	0.00668896	0.00334448	0.00668896
0.00668896	0.00668896	0.0267559	0.09699		0.25	0.09699	0.0267559	0.00668896	0.00668896
0.00668896	0.0100334	0.0668896	0.180602		0.3	0.180602	0.0668896	0.0100334	0.00668896
0.00334448	0.0167224	0.113712	0.274247		0.35	0.274247	0.113712	0.0167224	0.00334448
0.00668896	0.0334448	0.187291	0.374582		0.4	0.374582	0.187291	0.0334448	0.00668896
0.00668896	0.0468227	0.257525	0.471572		0.45	0.471572	0.257525	0.0468227	0.00668896
0.00668896	0.0802676	0.331104	0.555184		0.5	0.555184	0.331104	0.0802676	0.00668896
0.00668896	0.113712	0.411371	0.628763		0.55	0.628763	0.411371	0.113712	0.00668896
0.00668896	0.150502	0.481605	0.692308		0.6	0.692308	0.481605	0.150502	0.00668896
0.00668896	0.200669	0.551839	0.752508		0.65	0.752508	0.551839	0.200669	0.00668896
0.00668896	0.244147	0.608696	0.792642		0.7	0.792642	0.608696	0.244147	0.00668896
0.00668896	0.294314	0.662207	0.832776		0.75	0.832776	0.662207	0.294314	0.00668896
0.00668896	0.341137	0.702341	0.862876		0.8	0.862876	0.702341	0.341137	0.00668896
0.00668896	0.391304	0.742475	0.889632		0.85	0.889632	0.742475	0.391304	0.00668896
0.0100334	0.428094	0.782609	0.916388		0.9	0.916388	0.782609	0.428094	0.0100334
0.0100334	0.474916	0.80602	0.926421		0.95	0.926421	0.80602	0.474916	0.0100334
0.0100334	0.51505	0.832776	0.939799		1	0.939799	0.832776	0.51505	0.0100334
0.0133779	0.561873	0.856187	0.949833		1.05	0.949833	0.856187	0.561873	0.0133779
0.0167224	0.595318	0.882943	0.963211		1.1	0.963211	0.882943	0.595318	0.0167224
0.0200669	0.628763	0.896321	0.9699		1.15	0.9699	0.896321	0.628763	0.0200669
0.0234114	0.655518	0.909699	0.976589		1.2	0.976589	0.909699	0.655518	0.0234114

## Sheet: industrial frame
collapse	serious damage	medium damage	slight damage	no damage
0	0	0.03	0.19	0.78	0.1	PGA	fuzzy and push-over	Li & Wen	2012
0	0.01	0.08	0.55	0.36	0.15
0.01	0.05	0.4	0.48	0.06	0.2
0.06	0.2	0.53	0.19	0.02	0.3
0.11	0.5	0.34	0.05	0	0.4
0.65	0.26	0.09	0	0	0.6
0	0	0	0.05	0.95	6			Chen et al.	2017
0	0	0.02	0.08	0.9	7
0	0.02	0.07	0.28	0.63	6		analytical using Yin(1995)	Chen et al.	1999
0.01	0.04	0.11	0.27	0.57	7
0.04	0.11	0.2	0.26	0.39	8
0.11	0.2	0.27	0.23	0.19	9
0.00196078	0.00392157	0.00588235	0.0313725		0.15	SA	HAD mehtod, unfortificated, X direction	Zhu, PhD	2010
0.00588235	0.00196078	0.045098	0.986275		0.3
0.00784314	0.00588235	0.839216	0.996078		0.45
0.00588235	0.00392157	0.996078	0.996078		0.6
0.00196078	0.0666667	0.996078	0.998039		0.75
0.00588235	0.378431	0.994118	0.994118		0.9
0.00784314	0.760784	0.994118	0.996078		1.05
0.00784314	0.95098	0.998039	0.998039		1.2
0.00588235	0.994118	1	0.998039		1.35
0.00784314	0.994118	0.998039	1		1.5
0.0352941	0.998039	1	1		1.65
0.113725	0.998039	1	0.998039		1.8
0.25098	0.998039	0.996078	0.998039		1.95
0.419608	0.998039	0.994118	0.994118		2.1
0.601961	0.996078	0.996078	0.994118		2.25
0.75098	0.994118	0.996078	0.994118		2.4
0.85098	0.994118	0.996078	0.996078		2.55
0.923529	0.996078	0.996078	0.994118		2.7
0.956863	0.996078	0.992157	0.996078		2.85
0.978431	0.998039	0.994118	0.994118		3
0.00392157	0.00392157	0.00392157	0.00196078		0.15		HAD mehtod, fortificated, X direction
0.00392157	0.00196078	0.00196078	0.405882		0.3
0.00392157	0.00588235	0.0882353	0.992157		0.45
0.00588235	0.00588235	0.694118	0.996078		0.6
0.00588235	0.00196078	0.970588	0.994118		0.75
0.00980392	0.00588235	0.990196	0.998039		0.9
0.00784314	0.0117647	0.994118	0.996078		1.05
0.00784314	0.0705882	0.992157	0.996078		1.2
0.00588235	0.245098	0.994118	0.996078		1.35
0.00784314	0.501961	0.996078	0.998039		1.5
0.00196078	0.737255	0.998039	0.998039		1.65
0.00588235	0.884314	0.996078	0.994118		1.8
0.00784314	0.95098	0.996078	0.992157		1.95
0.0294118	0.982353	0.998039	1		2.1
0.072549	0.992157	0.998039	1		2.25
0.152941	0.994118	0.998039	0.996078		2.4
0.276471	0.994118	0.998039	0.994118		2.55
0.411765	1	0.998039	0.996078		2.7
0.55098	0.996078	0.996078	0.994118		2.85
0.67451	0.998039	0.998039	0.996078		3
0.00352734	0.00352734	0.00352734	0.195767		0.15		HAD mehtod, unfortificated, Y direction
0.00352734	0.00529101	0.677249	0.992945		0.3
0.00352734	0.00176367	0.996473	0.998236		0.45
0.00176367	0.0352734	0.991182	0.998236		0.6
0.00352734	0.816578	0.991182	0.998236		0.75
0.00352734	0.968254	0.992945	0.996473		0.9
0.00176367	0.994709	0.992945	0.998236		1.05
0.015873	0.994709	0.996473	0.998236		1.2
0.0793651	0.996473	0.996473	1		1.35
0.238095	0.998236	0.998236	1		1.5
0.45679	0.996473	0.994709	0.994709		1.65
0.687831	0.996473	0.996473	0.994709		1.8
0.844797	0.996473	0.998236	0.992945		1.95
0.934744	0.996473	0.998236	0.992945		2.1
0.970018	1	0.998236	0.996473		2.25
0.989418	0.998236	0.994709	0.996473		2.4
0.996473	0.998236	0.996473	0.998236		2.55
0.998236	0.998236	0.996473	0.994709		2.7
0.998236	0.996473	0.996473	1		2.85
0.996473		0.998236	0.998236		3
0.00352734	0.00176367	0	0.021164		0.15		HAD mehtod, fortificated, Y direction
0.00352734	0.00352734	0.223986	0.991182		0.3
0.00352734	0.00176367	0.964727	0.992945		0.45
0.00176367	0.00176367	0.998236	0.994709		0.6
0.00352734	0.031746	0.996473	0.994709		0.75
0.00352734	0.261023	0.994709	0.994709		0.9
0.00176367	0.654321	0.998236	0.994709		1.05
0.00352734	0.895944	0.998236	0.996473		1.2
0.00176367	0.977072	0.992945	0.996473		1.35
0.00352734	0.994709	0.992945	0.996473		1.5
0.015873	0.996473	0.998236	0.992945		1.65
0.0511464	0.998236	0.994709	0.996473		1.8
0.137566	0.996473	0.996473	0.996473		1.95
0.291005	0.996473	0.996473	0.992945		2.1
0.449735	0.998236	0.998236	0.992945		2.25
0.626102	0.998236	0.998236	0.992945		2.4
0.768959	0.994709	1	0.994709		2.55
0.864198	0.991182	0.996473	0.992945		2.7
0.922399	0.992945	0.998236	0.996473		2.85
0.955908	0.992945	0.996473	0.998236		3

## Sheet: stone-wood
collapse	serious damage	medium damage	slight damage	no damage
0	0.02	0.12	0.11	0.75	6		Chen et al.	2017
0	0.11	0.43	0.32	0.14	7
0	0.01	0.09	0.12	0.78	6
0	0.13	0.54	0.22	0.11	7
0.07	0.42	0.35	0.12	0.04	8
0	0	0.053	0.206	0.741	6	others	Li et al.	2013
0	0.068	0.2	0.338	0.394	7
0.055	0.294	0.398	0.18	0.073	8
0.135	0.429	0.351	0.085	0	9
0	0	0.05	0.42	0.53	6	others	Wei et al.	2008
0	0.03	0.42	0.41	0.14	7
0.02	0.28	0.54	0.16	0	8
0.22	0.49	0.25	0.04	0	9
0.72	0.25	0.03	0	0	10
0.025	0.165	0.225	0.265	0.325	6	others	He & Fu	2009
0.19	0.26	0.2	0.185	0.165	7
0.375	0.27	0.165	0.12	0.07	8
0.5	0.25	0.14	0.085	0.025	9
0.735	0.175	0.075	0.015	0	10
0	0	0.08	0.22	0.7	6		Sun et al.	2014
0.06	0.11	0.16	0.37	0.3	7
0.25	0.35	0.21	0.1	0.09	8
0.49	0.35	0.16	0	0	9
0.81	0.19	0	0	0	10

## Sheet: Chuandou-timber
collapse	serious damage	medium damage	slight damage	no damage
0	0	0.02	0.13	0.85	6		Chen et al.	2017
0	0	0.18	0.32	0.5	7
0	0	0.06	0.21	0.73	6		Piao, master	2013
0	0.04	0.19	0.32	0.45	7
0.01	0.19	0.4	0.33	0.08	8
0.14	0.44	0.28	0.14	0	9
0.28	0.46	0.25	0.01	0	10
0	0	0.08	0.22	0.7	6
0	0.07	0.22	0.3	0.41	7
0.06	0.23	0.44	0.22	0.05	8
0.17	0.48	0.3	0.05	0	9
0.31	0.49	0.2	0	0	10
0	0	0.04	0.15	0.81	6
0	0.02	0.2	0.3	0.48	7
0	0.16	0.37	0.35	0.12	8
0.09	0.41	0.35	0.14	0.01	9
0.22	0.43	0.29	0.06	0	10
0	0	0.05	0.23	0.72	6		Sun et al.	2012
0	0.04	0.21	0.32	0.43	7
0.01	0.19	0.39	0.33	0.08	8
0.13	0.45	0.3	0.12	0	9
0.26	0.47	0.26	0.01	0	10
0	0	0.04	0.21	0.75	6
0	0.03	0.19	0.32	0.46	7
0.005	0.175	0.38	0.34	0.1	8
0.11	0.44	0.31	0.14	0	9
0.24	0.46	0.3	0	0	10
0	0	0.05	0.22	0.73	6
0	0.04	0.2	0.31	0.45	7
0.005	0.185	0.39	0.33	0.09	8
0.12	0.44	0.32	0.12	0	9
0.25	0.46	0.285	0.005	0	10

## Sheet: wood
collapse	serious damage	medium damage	slight damage	no damage
0.017	0.364			0.619	7		Ge et al.	2014
0	0.068			0.932	6
0.01	0.021	0.0455	0.219	0.705	6		Qiu & Gao	2015
0.05	0.13	0.251	0.291	0.278	7
0.12	0.378	0.274	0.185	0.043	8
0.439	0.282	0.211	0.057	0.011	9
0.599	0.265	0.105	0.026	0.005	10
0	0	0.04	0.51	0.45	6		Wei et al.	2008
0	0.06	0.31	0.45	0.18	7
0.05	0.22	0.51	0.22	0	8
0.34	0.42	0.24	0	0	9
0.58	0.34	0.08	0	0	10

[truncated: 2 more sheets: stone, soil]
