# Supplementary material for: Review article: Review of fragility analyses for major building types in China with new implications for intensity–PGA relation development
Source: Copernicus journal article supplement (doi:10.5194/nhess-20-643-2020), 2020-02-27
Supplement: Supplementary file 3 [file nhess-20-643-2020-supplement.zip › supplements_20190528/[step4]China_fragility_output_database.xlsx]

## Sheet: soil_wood
Intensity	LS1	LS2	LS3	LS4
6	0.852	0.478	0.111	0.004
6	0.392	0.198	0.093	0.033
6	0.5	0.18	0.03	0
6	0.675	0.415	0.19	0.025
6	0.3085	0.1319	0.0318	0.0225
6	0.339	0.1151	0.0212	0.0095
6	0.668	0.45	0.262	0.118
6	0.44	0.16	0.03	0
6	0.5	0.23	0.07	0
6	0.51	0.21	0.05	0
6	0.34	0.09	0.01	0
6	0.45	0.17	0.02	0
6	0.43	0.14	0.02	0
6	0.43	0.14	0.02	0
6	0.67	0.41	0.18	0.02
6	0.3344	0.0761	0.0066	0.0001
6	0.675	0.415	0.19	0.025
6.5	0.6299	0	0	0
7	0.844	0.608	0.353	0.14
7	0.805	0.465	0.209	0.075
7	0.835	0.65	0.45	0.19
7	0.5896	0.3371	0.1632	0.0338
7	0.5944	0.3247	0.1034	0.0392
7	0.6243	0.2773	0.0671	0.006
7	0.948	0.847	0.681	0.505
7	0.8	0.49	0.23	0.05
7	0.83	0.53	0.3	0.08
7	0.89	0.56	0.28	0.07
7	0.67	0.3	0.04	0
7	0.82	0.49	0.24	0.04
7	0.77	0.46	0.21	0.04
7	0.77	0.46	0.21	0.04
7	0.83	0.64	0.38	0.18
7	0.6129	0.2598	0.0627	0.003
7	0.835	0.65	0.45	0.19
7.5	0.7443	0.1538	0	0
8	0.973	0.916	0.752	0.355
8	0.922	0.852	0.562	0.282
8	0.93	0.81	0.645	0.375
8	0.9845	0.8742	0.6994	0.4274
8	0.9437	0.7078	0.3347	0.1446
8	0.9237	0.6306	0.2313	0.017
8	0.962	0.877	0.784	0.681
8	0.95	0.87	0.55	0.22
8	0.99	0.94	0.63	0.26
8	0.98	0.92	0.66	0.31
8	0.91	0.65	0.31	0.08
8	0.96	0.86	0.54	0.2
8	0.92	0.82	0.49	0.19
8	0.92	0.82	0.49	0.19
8	0.93	0.81	0.64	0.37
8	0.9298	0.6193	0.2409	0.0417
8	0.93	0.81	0.645	0.375
8.5	0.7643	0.38041	0.0701	0
9	0.974	0.937	0.772	0.602
9	0.975	0.89	0.75	0.5
9	1	1	1	1
9	0.995	0.97	0.8	0.52
9	1	1	0.93	0.62
9	1	0.97	0.85	0.55
9	1	0.91	0.73	0.21
9	1	0.98	0.79	0.51
9	0.99	0.96	0.77	0.5
9	0.99	0.96	0.77	0.5
9	1	0.99	0.92	0.74
9	1	0.8545	0.5915	0.15
9	0.7973	0.503	0.1276	0
9	0.975	0.89	0.75	0.5
10	1	0.993	0.973	0.878
10	1	0.975	0.9	0.73
10	1	1	0.99	0.9
10	1	1	1	0.94
10	1	1	1	0.93
10	1	1	0.91	0.65
10	1	1	0.995	0.89
10	1	1	0.97	0.87
10	1	1	0.97	0.87
10	1	0.5599	0.2094	0
10	1	0.985	0.91	0.735

## Sheet: brick_wood
Intensity	LS1	LS2	LS3	LS4
6	0.164	0.028	0	0
8	0.921	0.662	0.381	0.142
7	0.713	0.295	0.106	0.029
6	0.31	0.071	0.018	0.006
7	0.484	0.136	0.051	0.002
6	0.203	0.062	0.014	0
6	0.5355	0.1798	0.0445	0.0028
7	0.6903	0.4099	0.1774	0.0483
8	0.8227	0.6782	0.4564	0.1978
9	1	1	0.7	0.2
6	0.271	0.066	0.009	0
7	0.689	0.401	0.16	0.039
8	0.915	0.742	0.478	0.118
9	0.986	0.93	0.719	0.438
10	0.993	1.026	0.863	0.598
6	0.233	0.053	0	0
7	0.894	0.233	0.053	0
8	0.989	0.86	0.214	0.041
9	1	0.979	0.844	0.166
8	0.95	0.95	0.25	0.25
6	0.18	0.18	0	0
8	0.95	0.95	0.55	0.55
7	0.89	0.89	0.01	0.01
6	0.27	0.26	0	0
6	0.51	0.2363	0.0858	0.0182
7	0.72	0.507	0.2863	0.0836
8	0.88	0.7159	0.485	0.1828
9	0.92	0.8141	0.6375	0.3767
10	0.978	0.9296	0.8105	0.6384
7	0.528	0.247	0.055	0
8	0.9	0.65	0.25	0
9	1	1	0.7	0.2
6	0.51	0.2363	0.0858	0.0182
7	0.72	0.507	0.2863	0.0836
8	0.88	0.7159	0.485	0.1828
9	0.92	0.8141	0.6375	0.3767
10	0.978	0.9296	0.8105	0.6384
6	0.709302	0.476744	0.186047	0.0813953
7	0.5793	0.3867	0.1051	0.0402
8	0.8	0.6	0.36	0.16
6	0.2534	0.0964	0.0299	0.0128
7	0.5708	0.2385	0.0588	0.0123
8	0.9275	0.5025	0.1375	0.0025
6	0.159	0.078	0.032	0.01
7	0.547	0.303	0.146	0.051
8	0.698	0.471	0.295	0.144
6	0.42	0.16	0.05	0.01
7	0.73	0.4	0.1	0.03
8	0.97	0.76	0.39	0.12
9	1	0.95	0.85	0.3
10	1	1	0.96	0.71
6	0.37	0.1	0.01	0
7	0.71	0.34	0.05	0
8	0.94	0.7	0.34	0.09
9	1	0.92	0.74	0.23
10	1	1	0.93	0.66
6	0.34	0.09	0.01	0
7	0.67	0.3	0.04	0
8	0.91	0.65	0.31	0.08
9	1	0.91	0.73	0.21
10	1	1	0.91	0.65
6	0.33	0.09	0.005	0
7	0.66	0.28	0.03	0
8	0.91	0.64	0.31	0.07
9	1	0.9	0.73	0.2
10	1	1	0.9	0.64
6	0.2783	0.0531	0.0043	0.0002
7	0.5846	0.2463	0.033	0.0008
8	0.8608	0.556	0.191	0.0121
9	1	0.81	0.53	0.13
6	0.51	0.2363	0.0858	0.0182
7	0.72	0.507	0.2863	0.0836
8	0.88	0.7159	0.485	0.1828
9	0.92	0.8141	0.6375	0.3767
10	0.978	0.9296	0.8105	0.6384

## Sheet: 1_brick_concrete
NO fortification	Intensity	LS1	LS2	LS3	LS4	unspecified-low-middle fortification	Intensity	LS1	LS2	LS3	LS4	high fortification	Intensity	LS1	LS2	LS3	LS4
	6	0.164	0.028	0	0		6	0.8	0.8	0.2	0		6	0.2552	0.0455	0.0099	0.0012
	6	0.677	0	0	0		6	0.3921	0.0998	0.0237	0.0027		6	0.2068	0.0497	0.0105	0.0014
	6	0.044	0.007	0	0		6	0.3921	0.0998	0.0237	0.0027		6	0.13	0.005	0	0
	6	0.111	0.006	0	0		6	0.3303	0.0695	0.0153	0.0017		6	0.13	0.005	0	0
	6	0.2185	0.0252	0.0031	0.0002		6	0.2385	0.0762	0.0244	0.0054		6	0	0	0	0
	6	0.2192	0.0287	0.0035	0.0003		6	0.15	0.01	0	0		6	0	0	0	0
	6	0.17	0.06	0	0		6	0.15	0.01	0	0		6	0.083	0.01	0	0
	6	0.17	0.06	0	0		6	0.43	0.15	0	0		6	0.13	0.016	0.002	0
	6	0.245	0.046	0.007	0		6	0.15	0	0	0		6	0.138	0.02	0.005	0
	6	1	0.6667	0.6667	0		6	0.248	0.04	0.015	0		6	0.185	0.031	0.007	0
	6	0.4871	0.1939	0.0644	0.013		6	0.295	0.061	0.017	0		6	0.193	0.03	0.01	0
	6	0.16	0.02	0	0		6	0.303	0.05	0.02	0		6	0.24	0.046	0.012	0
	6	0.07	0	0	0		6	0.35	0.076	0.022	0		6	0.219	0.0329	0.0064	0.0007
	6	0.26	0	0	0		6	0.348	0.0724	0.0147	0.0014		6	0.2327	0.0373	0.0075	0.0008
	6	0.3303	0.0695	0.0153	0.0017		6	0.3679	0.0828	0.0176	0.001		6	0.2552	0.0455	0.0099	0.0012
	6	0.6695	0.3127	0.0124	0		6	0.3921	0.0998	0.0237	0.0027		6	0.1413	0.0139	0.002	0.0002
	6	0.51	0.2363	0.0858	0.0182		6	0.2907	0.0506	0.0097	0.0009		6	0.1515	0.0157	0.0023	0.0002
	6	0.2192	0.0287	0.0035	0.0003		6	0.3071	0.058	0.0118	0.0012		6	0.1651	0.0185	0.0029	0.0002
	6	0.15	0.0259	0.0072	0		6	0.3303	0.0695	0.0153	0.0017		6	0	0	0	0
	6	0.107	0.035	0.001	0		6	0.331	0.057	0	0		6	0	0	0	0
	6	0.143	0	0	0		6	0.022	0.022	0	0		6	0.2327	0.0373	0.0075	0.0008
	6	0.22	0.04	0.01	0		6	0.243	0.019	0	0		7	0.2566	0.0849	0.0287	0.0064
	6	0.28	0.1	0.02	0		6	0.212	0.019	0	0		7	0.4543	0.1966	0.0416	0.0184
	6	0.23	0.01	0	0		6	0.113	0	0	0		7	0.32	0.095	0.005	0
	6	0.51	0.19	0.04	0.01		6	0.003	0	0	0		7	0.32	0.095	0.005	0
	6	0.1352	0.0468	0.0031	0		6	0.004	0.003	0	0		7	0.15	0	0	0
	6	0.2	0.03	0	0		6	0.2907	0.0506	0.0097	0.0009		7	0	0	0	0
	6	0.2504	0.0353	0.0017	0		6	0.3071	0.058	0.0118	0.0012		7	0.462	0.077	0.004	0
	6	0.206	0.043	0	0		6	0.3303	0.0695	0.0153	0.0017		7	0.599	0.23	0.115	0.006
	6	0	0	0	0		7	0.5653	0.2128	0.0502	0.0046		7	0.497	0.162	0.054	0.005
	6	0.013	0	0	0		7	0.4736	0.2025	0.0724	0.0155		7	0.644	0.335	0.16	0.031
	7	0.482	0.205	0.063	0.012		7	0.4736	0.2025	0.0724	0.0155		7	0.532	0.247	0.104	0.01
	7	0.325	0.021	0	0		7	0.3663	0.1353	0.0456	0.0096		7	0.689	0.44	0.205	0.056
	7	0.5132	0.183	0.046	0.0039		7	0.521	0.2283	0.0876	0.0123		7	0.2058	0.0591	0.0182	0.0037
	7	0.5151	0.1929	0.0549	0.0044		7	0.5	0.14	0.01	0		7	0.2246	0.0682	0.0218	0.0046
	7	0.24	0.09	0	0		7	0.5	0.14	0.01	0		7	0.2566	0.0849	0.0287	0.0064
	7	0.48	0.16	0	0		7	0.8	0	0	0		7	0.1111	0.022	0.0054	0.0009
	7	0.659	0.381	0.15	0.031		7	0.43	0	0	0		7	0.1219	0.0254	0.0064	0.0011
	7	0.7132	0.3887	0.1359	0.0189		7	0.567	0.332	0.154	0.015		7	0.1375	0.0307	0.008	0.0014
	7	0.5984	0.3474	0.171	0.0547		7	0.734	0.545	0.25	0.081		7	0.061	0	0	0
	7	0.72	0.06	0.01	0		7	0.602	0.417	0.204	0.02		7	0.35	0	0	0
	7	0.83	0.18	0	0		7	0.779	0.65	0.295	0.106		7	0.2246	0.0682	0.0218	0.0046
	7	0.3663	0.1353	0.0456	0.0096		7	0.3945	0.1419	0.0442	0.0082		8	0.3601	0.1746	0.0697	0.0196
	7	0.1745	0.0717	0.0285	0.0091		7	0.4303	0.1683	0.0561	0.0112		8	0.81	0.473	0.109	0.022
	7	0.415	0.113	0.037	0		7	0.4736	0.2025	0.0724	0.0155		8	0.7	0.32	0.07	0.01
	7	0.8285	0.6365	0.0659	0		7	0.3008	0.0948	0.0286	0.0054		8	0.7	0.32	0.07	0.01
	7	0.72	0.507	0.2863	0.0836		7	0.3276	0.1105	0.0349	0.0069		8	0.43	0	0	0
	7	0.5151	0.1929	0.0549	0.0044		7	0.3663	0.1353	0.0456	0.0096		8	0.15	0	0	0
	7	0.2123	0.0138	0.0006	0		7	0.859	0.244	0.047	0		8	0.672	0.376	0.213	0.003
	7	0.386	0.032	0.001	0		7	0.345	0.022	0.022	0		8	0.805	0.532	0.363	0.144
	7	0.329	0.01	0	0		7	0.832	0.153	0.014	0		8	0.727	0.476	0.263	0.018
	7	0.54	0.21	0.06	0.01		7	0.79	0.134	0.012	0		8	0.845	0.627	0.412	0.154
	7	0.61	0.34	0.13	0.04		7	0.744	0.039	0	0		8	0.782	0.576	0.313	0.033
	7	0.49	0.2	0.04	0		7	0.02	0.003	0	0		8	0.885	0.722	0.463	0.164
	7	0.72	0.37	0.15	0.05		7	0.137	0.003	0	0		8	0.2904	0.1275	0.0463	0.0121
	7	0.8155	0.4665	0.1382	0.019		7	0.3008	0.0948	0.0286	0.0054		8	0.3165	0.1444	0.0544	0.0146
	7	0.9	0.57	0.01	0		7	0.3276	0.1105	0.0349	0.0069		8	0.3601	0.1746	0.0697	0.0196
	7	0.497	0.1952	0.0539	0.0016		7	0.3663	0.1353	0.0456	0.0096		8	0.1548	0.0524	0.015	0.0033
	7	0.601	0.173	0.026	0		8	0.7787	0.5208	0.2421	0.0139		8	0.1706	0.0597	0.0176	0.0039
	7	0.206	0	0	0		8	0.6584	0.3964	0.1775	0.0501		8	0.1932	0.0711	0.0219	0.005
	7	0.171	0.012	0	0		8	0.6584	0.3964	0.1775	0.0501		8	0.66	0	0	0
	8	0.8331	0.4913	0.1045	0.0201		8	0.5175	0.2762	0.1135	0.031		8	0.765	0.184	0	0
	8	0.55	0.186	0.07	0.022		8	0.8037	0.5028	0.1828	0.0406		8	0.3165	0.1444	0.0544	0.0146
	8	0.8141	0.4802	0.173	0.0371		8	0.78	0.41	0.11	0.02		9	0.5204	0.3217	0.1538	0.0546
	8	0.8195	0.4666	0.1521	0.0242		8	0.78	0.41	0.11	0.02		9	0.88	0.66	0.38	0.05
	8	0.62	0.18	0.06	0		8	0.95	0	0	0.15		9	0.88	0.66	0.38	0.05
	8	0.885	0.722	0.468	0.109		8	0.8	0	0	0		9	0.8	0	0	0
	8	0.9048	0.6547	0.4464	0.1012		8	0.837	0.676	0.363	0.048		9	0.43	0	0	0
	8	0.7571	0.5487	0.3276	0.1291		8	0.925	0.817	0.513	0.174		9	0.789	0.581	0.353	0.051
	8	0.954	0.674	0.054	0.01		8	0.892	0.776	0.413	0.063		9	0.952	0.792	0.552	0.372
	8	0.77	0.35	0.14	0.02		8	0.965	0.912	0.563	0.184		9	0.829	0.656	0.438	0.086
	8	0.92	0.72	0.35	0.02		8	0.5651	0.3006	0.1166	0.0291		9	0.962	0.837	0.627	0.392
	8	0.5175	0.2762	0.1135	0.031		8	0.6083	0.3435	0.1429	0.0379		9	0.869	0.731	0.523	0.121
	8	0.453	0.3472	0.0832	0.0295		8	0.6584	0.3964	0.1775	0.0501		9	0.972	0.882	0.702	0.412
	8	0.745	0.4	0.125	0.005		8	0.4311	0.2055	0.0751	0.0186		9	0.4357	0.251	0.1088	0.0362
	8	0.9606	0.8372	0.525	0.0125		8	0.4672	0.2339	0.0899	0.0232		9	0.4682	0.2772	0.1248	0.0426
	8	0.88	0.7159	0.485	0.1828		8	0.5175	0.2762	0.1135	0.031		9	0.5204	0.3217	0.1538	0.0546
	8	0.8195	0.4666	0.1521	0.0242		8	0.961	0.852	0.237	0.039		9	0.2506	0.1205	0.0406	0.0116
	8	0.7806	0.4142	0.1981	0.0591		8	0.864	0.345	0.022	0.022		9	0.274	0.1349	0.0469	0.0137
	8	0.538	0.157	0.044	0		8	0.972	0.814	0.131	0.013		9	0.3063	0.1561	0.057	0.0171
	8	0.758	0.516	0	0		8	0.954	0.778	0.111	0.012		9	0.933	0.418	0	0
	8	0.9	0.62	0.27	0.06		8	0.957	0.715	0.026	0		9	1	0.745	0.184	0
	8	0.93	0.71	0.38	0.1		8	0.499	0.037	0.005	0		9	0.4682	0.2772	0.1248	0.0426
	8	0.87	0.62	0.26	0.06		8	0.835	0.186	0.007	0		10	0.7641	0.5783	0.3534	0.1568
	8	0.88	0.71	0.48	0.18		8	0.4311	0.2055	0.0751	0.0186		10	0.98	0.94	0.82	0.27
	8	0.9584	0.8274	0.4445	0.0928		8	0.4672	0.2339	0.0899	0.0232		10	0.98	0.94	0.82	0.27
	8	1	0.97	0.51	0.04		8	0.5175	0.2762	0.1135	0.031		10	0.95	0.28	0.28	0.15
	8	0.8055	0.5096	0.1261	0.0085		9	0.902	0.7394	0.4397	0.0868		10	0.8	0	0	0
	8	0.854	0.505	0.116	0.009		9	0.8488	0.638	0.3713	0.1391		10	0.968	0.902	0.722	0.365
	8	0.682	0.206	0	0		9	0.8488	0.638	0.3713	0.1391		10	0.974	0.903	0.771	0.527
	8	0.873	0.205	0.023	0		9	0.7133	0.4837	0.2498	0.089		10	0.973	0.917	0.777	0.425
	9	0.8895	0.7574	0.5078	0.1711		9	0.92	0.79	0.55	0.13		10	0.979	0.923	0.806	0.577
	9	0.817	0.6365	0.4915	0.11		9	0.92	0.79	0.55	0.13		10	0.978	0.932	0.832	0.485
	9	0.982	0.927	0.717	0.437		9	1	0	0	0.28		10	0.984	0.943	0.841	0.627
	9	0.9372	0.8662	0.6737	0.1088		9	0.95	0	0	0.15		10	0.3903	0.4909	0.2767	0.1133
	9	0.8936	0.7454	0.5354	0.2586		9	0.909	0.806	0.608	0.156		10	0.72	0.5248	0.3053	0.1289
	9	0.99	0.94	0.67	0.07		9	0.982	0.927	0.777	0.432		10	0.7641	0.5783	0.3534	0.1568
	9	0.7133	0.4837	0.2498	0.089		9	0.949	0.881	0.693	0.191		10	0.4851	0.291	0.133	0.0449
	9	0.7569	0.5643	0.327	0.1081		9	0.992	0.972	0.852	0.452		10	0.516	0.317	0.1489	0.0514
	9	0.745	0.575	0.369	0.021		9	0.7755	0.5342	0.2709	0.0915		10	0.555	0.3526	0.1725	0.0618
	9	1	0.9014	0.7025	0.0443		9	0.8107	0.5823	0.3157	0.1121		10	1	0.933	0.433	0
	9	0.92	0.8141	0.6375	0.3767		9	0.8488	0.638	0.3713	0.1391		10	1	1	0.533	0.107
	9	0.817	0.6365	0.4915	0.11		9	0.6253	0.3904	0.179	0.0588		10	0.72	0.5248	0.3053	0.1289
	9	0.955	0.844	0.355	0.111		9	0.6635	0.4293	0.2071	0.0704
	9	0.97	0.89	0.69	0.17		9	0.7133	0.4837	0.2498	0.089
	9	0.99	0.9	0.76	0.22		9	1	0.963	0.85	0.212
	9	0.96	0.87	0.67	0.15		9	1	0.864	0.345	0.022
	9	0.98	0.93	0.81	0.64		9	1	0.975	0.79	0.128
	9	1	0.9855	0.7904	0.3118		9	1	0.955	0.747	0.108
	9	1	1	0.96	0.48		9	0.993	0.954	0.756	0.026
	9	0.817	0.636	0.491	0.11		9	0.991	0.484	0.063	0.005
	9	0.994	0.682	0.206	0		9	0.997	0.814	0.234	0.001
	9	1	0.888	0.283	0.023		9	0.6253	0.3906	0.179	0.0588
	10	1	1	0.97	0.67		9	0.6635	0.4293	0.2071	0.0704
	10	0.989	0.963	0.861	0.597		9	0.7133	0.4837	0.2498	0.089
	10	0.902	0.7059	0.5686	0.2549		10	0.6782	0.4253	0.1724	0.0345
	10	1	1	0.91	0.53		10	0.9757	0.7059	0.5021	0.363
	10	0.9158	0.7754	0.5311	0.2506		10	0.9757	0.8983	0.6945	0.363
	10	0.9953	0.9304	0.4809	0.2932		10	0.9158	0.7754	0.5311	0.2506
	10	1	1	0.8245	0.2831		10	0.99	0.96	0.85	0.35
	10	0.978	0.9296	0.8105	0.6384		10	0.99	0.96	0.85	0.35
	10	1	1	0.97	0.67		10	1	0	0	0.37
	10	1	1	1	0.6		10	1	0.28	0.28	0.28
	10	1	0.99	0.9	0.52		10	0.983	0.947	0.887	0.545
	10	1	1	0.95	0.56		10	0.989	0.963	0.876	0.677
	10	1	1	0.91	0.51		10	0.988	0.962	0.942	0.605
	10	1	1	1	0.93		10	0.994	0.983	0.911	0.727
	10	1	0.994	0.741	0.227		10	0.9543	0.8383	0.5895	0.2731
	10	1	1	0.904	0.38		10	0.965	0.8673	0.6384	0.3133
	11	0.9275	0.8261	0.7391	0.4203		10	0.9757	0.8983	0.6945	0.363
							10	0.8687	0.6925	0.4323	0.1846
							10	0.8904	0.729	0.4737	0.211
							10	0.9158	0.7754	0.5311	0.2506
							10	1	1	0.964	0.772
							10	1	1	0.864	0.022
							10	1	0.999	0.957	0.692
							10	1	1	0.924	0.653
							10	1	1	0.973	0.681
							10	1	0.99	0.81	0.118
							10	1	0.997	0.915	0.302
							10	0.8687	0.6925	0.4323	0.1846
							10	0.8904	0.729	0.4737	0.211
							10	0.9158	0.7754	0.5311	0.2506
							11	0.6709	0.4472	0.3551	0.013

## Sheet: 2_analytical_masonry
0.05-0.15g fortification	PGA(g)	LS1	LS2	LS3	LS4	0.2-0.4g fortification	PGA(g)	LS1	LS2	LS3	LS4
	0.05	0.0100671	0.0100671	0.0100671	0.00671141		0.05	0.00576369	0.00576369	0.00576369	0.00576369
	0.05	0	0	0	0		0.05	0.00284091	0.00568182	0.00568182	0.00852273
	0.1	0.46	0.18	0.041	0.002		0.05	0.00849858	0.00849858	0.00849858	0.00566572
	0.1	0.33	0.1	0.02	0.004		0.1	0.12	0.03	0.01	0.001
	0.1	0.24	0.06	0.01	0.001		0.1	0.1	0.02	0.01	0.001
	0.1	0.18	0.065	0.02	0.01		0.1	0.07	0.02	0.01	0.001
	0.1	0.201342	0.0234899	0.00671141	0.00671141		0.1	0.00864553	0.00576369	0.00864553	0.00576369
	0.1	0.0385965	0	0	0.00350877		0.1	0.00568182	0.00852273	0.00852273	0.00852273
	0.15	0.432886	0.137584	0.0302013	0.00671141		0.1	0.0113314	0.0113314	0.00849858	0.0113314
	0.15	0.168421	0.0140351	0	0		0.15	0.0778098	0.00864553	0.00576369	0.00864553
	0.2	0.77	0.46	0.173	0.038		0.15	0.0113636	0.00852273	0.00852273	0.00568182
	0.2	0.64	0.33	0.104	0.02		0.15	0.0113314	0.0113314	0.00849858	0.0113314
	0.2	0.55	0.24	0.06	0.005		0.2	0.36	0.13	0.03	0.01
	0.2	0.47	0.18	0.05	0.02		0.2	0.31	0.09	0.02	0.01
	0.2	0.64094	0.265101	0.0939597	0.0167785		0.2	0.24	0.07	0.02	0.01
	0.2	0.336842	0.0807018	0.0140351	0		0.2	0.184438	0.0317003	0.00864553	0.00576369
	0.25	0.775168	0.416107	0.184564	0.0436242		0.2	0.0539773	0.0113636	0.00852273	0.00852273
	0.25	0.498246	0.168421	0.0421053	0		0.2	0.0141643	0.0169972	0.00849858	0.0113314
	0.3	0.89	0.65	0.33	0.1		0.25	0.302594	0.0720461	0.0172911	0.00864553
	0.3	0.8	0.52	0.22	0.06		0.25	0.113636	0.0142045	0.00852273	0.00852273
	0.3	0.73	0.41	0.14	0.04		0.25	0.0453258	0.0169972	0.00849858	0.0113314
	0.3	0.66	0.34	0.11	0.03		0.3	0.55	0.25	0.07	0.02
	0.3	0.855705	0.540268	0.288591	0.0771812		0.3	0.49	0.2	0.05	0.01
	0.3	0.638596	0.259649	0.0877193	0.00701754		0.3	0.42	0.15	0.04	0.01
	0.35	0.916107	0.654362	0.385906	0.124161		0.3	0.435159	0.135447	0.037464	0.00576369
	0.35	0.729825	0.357895	0.147368	0.0210526		0.3	0.190341	0.03125	0.00852273	0.00568182
	0.4	0.94	0.78	0.47	0.18		0.3	0.0934844	0.0169972	0.00849858	0.0113314
	0.4	0.88	0.64	0.33	0.11		0.35	0.541787	0.198847	0.0605187	0.0144092
	0.4	0.83	0.55	0.24	0.07		0.35	0.269886	0.0511364	0.0113636	0.00568182
	0.4	0.78	0.48	0.19	0.05		0.35	0.133144	0.0169972	0.0113314	0.0141643
	0.4	0.949664	0.741611	0.483221	0.191275		0.4	0.68	0.36	0.13	0.03
	0.4	0.807018	0.45614	0.210526	0.0491228		0.4	0.63	0.31	0.1	0.02
	0.45	0.969799	0.802013	0.567114	0.251678		0.4	0.55	0.24	0.07	0.01
	0.45	0.863158	0.54386	0.280702	0.0666667		0.4	0.62536	0.268012	0.0951009	0.0115274
	0.5	0.97	0.85	0.57	0.26		0.4	0.346591	0.0852273	0.0198864	0.00852273
	0.5	0.93	0.74	0.43	0.17		0.4	0.189802	0.0339943	0.0169972	0.0141643
	0.5	0.89	0.65	0.33	0.1		0.45	0.711816	0.345821	0.14121	0.0345821
	0.5	0.85	0.57	0.26	0.08		0.45	0.431818	0.127841	0.03125	0.00568182
	0.5	0.97651	0.845638	0.64094	0.312081		0.45	0.246459	0.0481586	0.01983	0.0141643
	0.5	0.901754	0.617544	0.34386	0.101754		0.5	0.77	0.47	0.19	0.05
	0.55	0.989933	0.88255	0.694631	0.379195		0.5	0.72	0.41	0.14	0.04
	0.55	0.929825	0.687719	0.414035	0.136842		0.5	0.66	0.33	0.11	0.02
	0.6	0.98	0.89	0.66	0.33		0.5	0.769452	0.417867	0.193084	0.0403458
	0.6	0.95	0.8	0.52	0.22		0.5	0.5	0.176136	0.0539773	0.0142045
	0.6	0.92	0.73	0.41	0.15		0.5	0.311615	0.0679887	0.0226629	0.0169972
	0.6	0.89	0.66	0.34	0.11		0.55	0.824207	0.487032	0.239193	0.0576369
	0.6	0.996644	0.912752	0.751678	0.436242		0.55	0.571023	0.224432	0.0738636	0.0142045
	0.6	0.947368	0.736842	0.473684	0.178947		0.55	0.371105	0.0991501	0.0311615	0.0141643
	0.65	0.996644	0.92953	0.795302	0.493289		0.6	0.83	0.56	0.25	0.08
	0.65	0.964912	0.789474	0.533333	0.217544		0.6	0.79	0.49	0.21	0.05
	0.7	0.99	0.92	0.72	0.4		0.6	0.73	0.41	0.15	0.04
	0.7	0.96	0.85	0.59	0.28		0.6	0.855908	0.544669	0.282421	0.0778098
	0.7	0.95	0.79	0.48	0.2		0.6	0.633523	0.267045	0.0994318	0.0170455
	0.7	0.92	0.72	0.41	0.14		0.6	0.433428	0.135977	0.0396601	0.0141643
	0.7	0.996644	0.942953	0.828859	0.543624		0.65	0.884726	0.605187	0.337176	0.100865
	0.7	0.975439	0.824561	0.582456	0.263158		0.65	0.684659	0.315341	0.119318	0.0198864
	0.75	0.996644	0.963087	0.862416	0.597315		0.65	0.495751	0.167139	0.0538244	0.0141643
	0.75	0.982456	0.85614	0.635088	0.305263		0.7	0.87	0.63	0.31	0.1
	0.8	0.99	0.95	0.78	0.48		0.7	0.84	0.57	0.25	0.08
	0.8	0.98	0.89	0.65	0.33		0.7	0.78	0.49	0.19	0.05
	0.8	0.96	0.83	0.55	0.24		0.7	0.907781	0.651297	0.383285	0.121037
	0.8	0.94	0.78	0.47	0.18		0.7	0.732955	0.372159	0.150568	0.0284091
	0.8	0.996644	0.966443	0.885906	0.634228		0.7	0.538244	0.206799	0.0764873	0.0169972
	0.8	0.989474	0.877193	0.673684	0.347368		0.75	0.933718	0.70317	0.435159	0.15562
	0.85	0.996644	0.973154	0.902685	0.681208		0.75	0.778409	0.417614	0.1875	0.0369318
	0.85	0.989474	0.894737	0.712281	0.385965		0.75	0.589235	0.243626	0.082153	0.01983
	0.9	1	0.96	0.81	0.52		0.8	0.91	0.69	0.37	0.13
	0.9	0.98	0.91	0.7	0.39		0.8	0.88	0.63	0.31	0.1
	0.9	0.97	0.87	0.6	0.31		0.8	0.83	0.55	0.24	0.07
	0.9	0.95	0.81	0.52	0.2		0.8	0.945245	0.737752	0.478386	0.184438
	0.9	0.996644	0.973154	0.922819	0.708054		0.8	0.809659	0.463068	0.221591	0.0568182
	0.9	0.992982	0.919298	0.750877	0.435088		0.8	0.637394	0.27762	0.0991501	0.0226629
	0.95	0.996644	0.979866	0.932886	0.744966		0.85	0.956772	0.766571	0.524496	0.216138
	0.95	0.996491	0.933333	0.782456	0.463158		0.85	0.840909	0.514205	0.252841	0.0625
	1	1	0.97	0.85	0.57		0.85	0.668555	0.31728	0.130312	0.0226629
	1	0.99	0.93	0.75	0.43		0.9	0.93	0.74	0.42	0.16
	1	0.98	0.89	0.65	0.33		0.9	0.91	0.68	0.36	0.12
	1	0.96	0.85	0.57	0.25		0.9	0.87	0.61	0.29	0.09
	1	0.996644	0.989933	0.939597	0.775168		0.9	0.9683	0.795389	0.56196	0.244957
	1	0.996491	0.940351	0.807018	0.512281		0.9	0.860795	0.553977	0.289773	0.0852273
	1.05	0.996644	0.993289	0.95302	0.802013		0.9	0.708215	0.348442	0.13881	0.0311615
	1.05	0.996491	0.950877	0.838596	0.540351		0.95	0.976945	0.829971	0.602305	0.279539
	1.1	0.996644	0.993289	0.963087	0.825503		0.95	0.877841	0.59375	0.321023	0.0965909
	1.1	0.996491	0.954386	0.852632	0.568421		0.95	0.739377	0.388102	0.167139	0.0368272
	1.15	0.996644	0.996644	0.963087	0.838926		1	0.95	0.78	0.47	0.19
	1.15	0.996491	0.954386	0.870175	0.607018		1	0.92	0.73	0.42	0.15
	1.2	0.996644	0.996644	0.963087	0.855705		1	0.89	0.66	0.33	0.1
	1.2	0.996491	0.954386	0.891228	0.631579		1	0.979827	0.847262	0.636888	0.311239
							1	0.900568	0.619318	0.355114	0.113636
							1	0.767705	0.424929	0.192635	0.0424929
							1.05	0.985591	0.870317	0.674352	0.351585
							1.05	0.914773	0.65625	0.386364	0.133523
							1.05	0.804533	0.461756	0.212465	0.0566572
							1.1	0.988473	0.896254	0.694524	0.37464
							1.1	0.931818	0.701705	0.420455	0.150568
							1.1	0.82153	0.504249	0.246459	0.0651558
							1.15	0.988473	0.916427	0.73487	0.400576
							1.15	0.940341	0.724432	0.457386	0.170455
							1.15	0.838527	0.529745	0.25779	0.0736544
							1.2	0.997118	0.930836	0.755043	0.446686
							1.2	0.948864	0.747159	0.477273	0.193182
							1.2	0.852691	0.555241	0.283286	0.0849858

## Sheet: 3_RC
unspecified-low-middle fortification	Intensity	LS1	LS2	LS3	LS4	high fortification (VIII, IX, X)	Intensity	LS1	LS2	LS3	LS4
	8	0.7547	0.4379	0.1863	0		6	0.1	0	0	0
	6	0.1681	0.0098	0.0009	0		7	0.15	0.01	0	0
	7	0.4204	0.1018	0.0169	0		8	0.3	0.05	0	0
	8	0.6004	0.2596	0.1058	0.0169		9	0.5	0.185	0.04	0.005
	9	0.7688	0.4887	0.2971	0.1926		10	0.8	0.5	0.15	0.045
	6	0.1683	0.0102	0.001	0		6	0.1493	0.021	0	0
	7	0.4225	0.1188	0.0213	0		7	0.4127	0.0694	0	0
	8	0.6153	0.2594	0.1048	0.0146		8	0.74	0.31	0.05	0
	9	0.9912	0.753	0.2252	0.023		6	0.05	0	0	0
	10	1	0.9143	0.7714	0.5778		7	0.15	0.02	0	0
	6	0.23	0.033	0.009	0		8	0.5	0.07	0.01	0
	7	0.524	0.232	0.038	0		9	0.81	0.53	0.22	0.04
	8	0.816	0.556	0.204	0.022		10	0.98	0.91	0.65	0.2
	9	0.838	0.719	0.6	0.107		6	0	0	0	0
	10	0.974	0.946	0.879	0.421		7	0.05	0	0	0
	6	0	0	0	0		8	0.45	0.03	0	0
	7	0	0	0	0		9	0.85	0.33	0.02	0
	8	0.2358	0.0332	0	0		10	0.95	0.67	0.27	0.05
	9	0.991	0.7406	0.267	0.054		6	0.05	0	0	0
	6	0.03	0	0	0		7	0.15	0.02	0	0
	7	0.07	0.01	0	0		8	0.5	0.07	0.01	0
	8	0.53	0.1	0.01	0		9	0.75	0.41	0.16	0.02
	9	0.97	0.55	0.16	0.02		10	0.98	0.91	0.65	0.2
	10	1	0.97	0.78	0.23		6	0.05	0	0	0
	8	0.48	0.09	0.03	0		7	0.1	0	0	0
	6	0.18	0	0	0		8	0.2	0.05	0	0
	8	0.87	0.6	0.35	0.09		9	0.45	0.095	0.01	0
	7	0.85	0.14	0	0		10	0.7	0.35	0.08	0.025
	6	0.13	0	0	0
	6	0.12	0	0	0
	7	0.25	0.02	0	0
	8	0.45	0.12	0.017	0.002
	9	0.65	0.345	0.09	0.015
	10	0.85	0.645	0.24	0.075
	10	0.7177	0.5076	0.279	0.1306
	9	0.6863	0.4785	0.2315	0.038
	8	0.1768	0.0804	0.0205	0.003
	7	0.077	0.0243	0.003	0
	6	0.15	0	0	0
	7	0.4	0.05	0	0
	8	0.6	0.24	0.03	0.005
	9	0.8	0.43	0.15	0.025
	10	0.9	0.745	0.35	0.095
	6	0.12	0	0	0
	7	0.25	0.02	0	0
	8	0.45	0.12	0.017	0.002
	9	0.65	0.345	0.09	0.015
	10	0.85	0.645	0.24	0.075
	6	0.1683	0.0102	0.001	0
	7	0.4225	0.1188	0.0213	0
	8	0.6153	0.2594	0.1048	0.0146
	9	0.9912	0.753	0.2252	0.023
	10	1	0.9143	0.7714	0.5778
	6	0.1338	0.0136	0	0
	7	0.2065	0.0061	0	0
	8	0.5874	0.2557	0.1247	0.0419
	6	0.603175	0.206349	0.031746	0
	7	0.3994	0.1395	0.0411	0
	8	0.75	0.4375	0.25	0.0625
	6	0.055	0	0	0
	7	0.112	0	0	0
	8	0.316	0	0	0
	6	0.065	0.005	0	0
	7	0.19	0.04	0	0
	8	0.56	0.1	0.02	0
	9	0.85	0.58	0.3	0.07
	10	0.99	0.94	0.8	0.25
	6	0	0	0	0
	7	0.05	0	0	0
	8	0.49	0.05	0	0
	9	0.88	0.41	0.04	0
	10	0.98	0.76	0.33	0.08
	6	0.065	0.005	0	0
	7	0.19	0.04	0	0
	8	0.56	0.1	0.02	0
	9	0.85	0.49	0.24	0.04
	10	0.99	0.94	0.8	0.25
	6	0.12	0	0	0
	7	0.25	0.02	0	0
	8	0.45	0.12	0.02	0
	9	0.65	0.35	0.09	0.02
	6	0.1996	0.0132	0	0
	7	0.393	0.0923	0.0158	0
	8	0.8879	0.1161	0.0188	0
	9	0.79	0.45	0.12	0
	6	0.15	0	0	0
	7	0.4	0.05	0	0
	8	0.6	0.24	0.03	0.005
	9	0.8	0.43	0.15	0.025
	10	0.9	0.745	0.35	0.095
	6	0.12	0	0	0
	7	0.25	0.02	0	0
	8	0.45	0.12	0.017	0.002
	9	0.65	0.345	0.09	0.015
	10	0.85	0.645	0.24	0.075
	6	0.002	0.001	0	0
	7	0.166	0.002	0	0
	8	0.786	0.148	0.004	0
	9	0.996	0.753	0.176	0.002
	10	1	0.995	0.745	0.195
	6	0	0	0	0
	7	0.156	0	0	0
	8	0.873	0.141	0	0
	9	1	0.748	0.213	0
	10	1	0.998	0.743	0.222
	6	0.12	0	0	0
	7	0.25	0.02	0	0
	8	0.45	0.12	0.017	0.002
	9	0.65	0.345	0.09	0.015
	10	0.85	0.645	0.24	0.075

## Sheet: 4_analytical_RC
unspecified-low-middle fortification (0.05g, 0.1g, 0.15g)	PGA(g)	LS1	LS2	LS3	LS4	high fortification (0.2g, 0.3g, 0.4g)	PGA(g)	LS1	LS2	LS3	LS4	unspecified-low-middle fortification (0.05g, 0.1g, 0.15g)	SA(g)	LS1	LS2	LS3	LS4	high fortification (0.2g, 0.3g, 0.4g)	SA(g)	LS1	LS2	LS3	LS4
	0.025	0	0	0	0		0.05	0.00303951	0.00303951	0.00303951	0		0.05	0	0.00238095	0.00238095	0		0.1	0.00249377	0	0.00249377	0.00249377
	0.025	0	0	0	0		0.05	0.0522648	0.00348432	0	0		0.0512821	0.140449	0	0	0.00280899		0.1	0.0018797	0.0037594	0.0018797	0.0018797
	0.05	0.07	0.02	0	0		0.05	0	0	0.003367	0		0.1	0.974504	0.0708215	0.00566572	0.00283286		0.1	0.00744879	0.00744879	0.00744879	0.00372439
	0.05	0.02	0	0	0		0.05	0.00560224	0.00840336	0.0112045	0.0112045		0.1	0.957096	0.039604	0.00330033	0.00330033		0.1	0.00372439	0.00372439	0.00558659	0.00744879
	0.05	0	0	0	0		0.05	0.00668896	0.00668896	0.00668896	0.00668896		0.1	0.983819	0.0841424	0.00323625	0		0.125	0.952229	0.0382166	0.00318471	0
	0.05	0	0	0	0		0.0512821	0.202643	0.0132159	0.00881057	0.00881057		0.1	0.983553	0.0559211	0.00328947	0.00328947		0.125	0.968354	0.00316456	0.00316456	0.00316456
	0.05	0	0	0	0		0.075	0.00506329	0.00506329	0.00253165	0.00506329		0.1	0	0.00249377	0	0.00249377		0.125	0.0996678	0.0996678	0.00332226	0.00664452
	0.05	0	0	0	0		0.075	0.00253165	0.00253165	0.00253165	0.00253165		0.1	0.0144033	0.00411523	0.00411523	0.00411523		0.125	0.983819	0.00970874	0.00647249	0.00647249
	0.05	0	0	0	0		0.1	0.05	0.015	0.004	0.001		0.1	0.00411523	0	0.00205761	0.00205761		0.15	0.0131579	0.00657895	0.00986842	0.00986842
	0.05	0	0	0	0		0.1	0.037	0.01	0.001	0.001		0.1	0.0018797	0.0018797	0.0037594	0.0018797		0.2	0.922693	0.00249377	0.00249377	0.00498753
	0.05	0	0	0	0		0.1	0.028	0.004	0.002	0.001		0.1	0.0344828	0	0.00383142	0.00383142		0.2	0.629699	0.0056391	0.0018797	0.0037594
	0.05	0.00311526	0.00311526	0.00311526	0.00311526		0.1	0.00911854	0.00303951	0.00607903	0.00303951		0.1	0.00383142	0.00191571	0	0		0.2	0.916201	0.0614525	0.00372439	0.00558659
	0.05	0.0278746	0	0	0		0.1	0	0	0	0		0.1	0.00368324	0.00184162	0.00736648	0.00368324		0.2	0.214153	0.00744879	0.00558659	0.00558659
	0.05	0.00480769	0.00961538	0.00961538	0.00480769		0.1	0.662021	0	0.00348432	0.00348432		0.1	0.00368324	0.00552486	0.00184162	0.00368324		0.25	0.990446	0.251592	0.0191083	0.00318471
	0.05	0.00403226	0.00403226	0.00806452	0.00806452		0.1	0.023569	0.003367	0	0.003367		0.1	0.0285714	0.00238095	0.00714286	0.00238095		0.25	0.996835	0.123418	0.00316456	0.00316456
	0.0512821	0.00310559	0.00310559	0.00310559	0.00310559		0.1	0.0112045	0.00560224	0.0112045	0.00840336		0.100233	0.75	0.115169	0.00280899	0.00280899		0.25	0.448505	0.451827	0.0498339	0.00664452
	0.0512821	0.19244	0.0137457	0.00684932	0.00687285		0.1	0.00668896	0.00668896	0.00668896	0.00668896		0.15	0.00986842	0.00986842	0.00986842	0.00986842		0.25	0.993528	0.229773	0.00647249	0.00647249
	0.0512821	0.183051	0.0135593	0.00677966	0.00677966		0.100233	0.647577	0.140969	0.00881057	0.00881057		0.15	0.0359477	0.0130719	0.0163399	0.0130719		0.3	0.776316	0.0328947	0.00986842	0.00986842
	0.0512821	0.167808	0.00684932	0.00342466	0.00684932		0.15	0.0607903	0.00607903	0.00607903	0.00607903		0.15	0.0130719	0.00980392	0.00980392	0.00980392		0.3	0.997506	0.628429	0.00498753	0.00498753
	0.075	0.31	0.11	0	0		0.15	0.313924	0	0.00506329	0.00253165		0.15	0.5	0.0047619	0.00714286	0.00714286		0.3	0.996241	0.503759	0.0037594	0.0037594
	0.075	0.08	0.03	0	0		0.15	0.131646	0	0.00506329	0.00253165		0.151515	0.94382	0.410112	0.0674157	0.00561798		0.3	0.994413	0.867784	0.00744879	0.00558659
	0.075	0.00178891	0.00357782	0.00357782	0.00178891		0.15	0.944251	0.0313589	0.00348432	0.00348432		0.198135	0.980337	0.648876	0.176966	0.00280899		0.3	0.964618	0.0986965	0.00744879	0.00931099
	0.075	0.0483005	0.00178891	0.00357782	0.00178891		0.15	0.141414	0.0505051	0.00673401	0.00673401		0.2	0.994334	0.345609	0.0396601	0.00283286		0.375	0.990446	0.528662	0.0955414	0.00636943
	0.1	0.47	0.25	0	0		0.15	0.0532213	0.0140056	0.0112045	0.0112045		0.2	0.993399	0.227723	0.0165017	0.00330033		0.375	0.996835	0.439873	0.0253165	0.00316456
	0.1	0.18	0.08	0	0		0.15	0.00668896	0.00668896	0.00668896	0.00668896		0.2	0.990291	0.38835	0.038835	0.00323625		0.375	0.697674	0.697674	0.152824	0.0166113
	0.1	0.0321	0	0	0		0.151515	0.859031	0.356828	0.0176211	0.00881057		0.2	0.993421	0.351974	0.0328947	0.00657895		0.375	0.993528	0.550162	0.0647249	0.00647249
	0.1	0	0	0	0		0.198135	0.942731	0.555066	0.0572687	0.00881057		0.2	0.922693	0.0249377	0	0		0.4	0.995012	0.982544	0.00498753	0.00249377
	0.1	0.0084	0	0	0		0.2	0.21	0.05	0.009	0.001		0.2	0.979424	0.251029	0.00617284	0.00617284		0.4	0.99812	0.954887	0.0037594	0.0037594
	0.1	0.0275	0	0	0		0.2	0.17	0.03	0.002	0.002		0.2	0.802469	0.0123457	0.00205761	0.00411523		0.4	0.996276	0.994413	0.00931099	0.00744879
	0.1	0.0866	0	0	0		0.2	0.13	0.03	0.007	0.002		0.2	0.898496	0.0620301	0.0018797	0.0018797		0.4	0.996276	0.715084	0.00744879	0.00372439
	0.1	0.0458	0	0	0		0.2	0.176292	0.0303951	0.00911854	0.00607903		0.2	0.98659	0.329502	0.00574713	0.00383142		0.45	0.993421	0.555921	0.0131579	0.00986842
	0.1	0.0139	0	0	0		0.2	0.894737	0.0385965	0	0		0.2	0.781609	0.0191571	0.00191571	0.00766284		0.5	0.993631	0.729299	0.207006	0.022293
	0.1	0.24	0.06	0.014	0.001		0.2	0.989547	0.139373	0.00348432	0.00348432		0.2	0.600368	0.00184162	0.00368324	0.00368324		0.5	1	0.731013	0.10443	0.00632911
	0.1	0.15	0.03	0.006	0.001		0.2	0.3367	0.148148	0.013468	0.010101		0.2	0.598527	0.0092081	0.00552486	0.00736648		0.5	0.840532	0.833887	0.302326	0.0398671
	0.1	0.1	0.03	0.01	0.001		0.2	0.154062	0.0504202	0.0140056	0.0112045		0.2	0.961905	0	0.00714286	0.0047619		0.5	0.993528	0.750809	0.177994	0.0161812
	0.1	0.07	0.02	0.01	0.001		0.2	0.0401338	0.00668896	0.00334448	0.00668896		0.249417	0.991573	0.780899	0.297753	0.00561798		0.5	0.995012	0.992519	0.00498753	0.00249377
	0.1	0.0778816	0.00934579	0.00623053	0.00311526		0.225	0.967089	0.162025	0.00253165	0		0.25	0.997619	0.0190476	0.0047619	0.0047619		0.5	0.99812	0.992481	0.0056391	0.0037594
	0.1	0.0526316	0	0	0		0.225	0.896203	0.0455696	0.00506329	0.00506329		0.3	0.994334	0.572238	0.121813	0.0113314		0.5	0.996276	0.998138	0.0595903	0.00931099
	0.1	0.158854	0.00520833	0.00260417	0.00520833		0.249417	0.977974	0.700441	0.110132	0.00881057		0.3	0.9967	0.458746	0.0726073	0.00660066		0.5	0.996276	0.975791	0.00744879	0.00931099
	0.1	0.00260417	0.00260417	0.00260417	0.00260417		0.25	0.337386	0.0851064	0.00911854	0.00607903		0.3	0.993528	0.650485	0.12945	0.00647249		0.6	0.993421	0.970395	0.00986842	0.00986842
	0.1	0.480836	0	0	0		0.25	0.996516	0.341463	0	0.00348432		0.3	0.993421	0.601974	0.111842	0.00986842		0.6	0.995012	0.995012	0.0947631	0.00498753
	0.1	0.0817308	0.0192308	0.00961538	0.00961538		0.25	0.518519	0.289562	0.0606061	0.00673401		0.3	0.799342	0.0361842	0.00986842	0.00657895		0.6	0.996241	0.99812	0.0620301	0.0018797
	0.1	0.0403226	0.0120968	0.00806452	0.00806452		0.25	0.268908	0.123249	0.0168067	0.0140056		0.3	0.944444	0.173203	0.0130719	0.0163399		0.6	0.996276	1	0.363128	0.00744879
	0.100233	0.425466	0.00310559	0.00310559	0.00621118		0.25	0.09699	0.0267559	0.00668896	0.00668896		0.3	0.584967	0.0228758	0.00980392	0.0130719		0.6	0.994413	0.994413	0.00931099	0.00931099
	0.100233	0.701031	0.171821	0.00342466	0.00687285		0.3	0.37	0.13	0.03	0.01		0.3	0.995012	0.765586	0	0.00249377		0.625	0.990446	0.843949	0.33758	0.0477707
	0.100233	0.698305	0.162712	0.0101695	0.00677966		0.3	0.31	0.09	0.02	0.003		0.3	0.993827	0.958848	0.00411523	0.00617284		0.625	1	0.879747	0.25	0.0221519
	0.100233	0.712329	0.150685	0.00684932	0.00684932		0.3	0.27	0.07	0.01	0.005		0.3	0.995885	0.641975	0.00411523	0.00617284		0.625	0.916944	0.916944	0.448505	0.0797342
	0.125	0.62	0.33	0.02	0		0.3	0.49848	0.173252	0.0212766	0.00607903		0.3	0.994361	0.81203	0.0056391	0.0037594		0.625	0.996764	0.880259	0.323625	0.038835
	0.125	0.29	0.15	0	0		0.3	0.992982	0.785965	0	0		0.3	0.996169	0.977011	0.00766284	0.00574713		0.7	0.995012	0.995012	0.38404	0.00498753
	0.15	0.7	0.52	0.06	0		0.3	0.997468	0.792405	0.00506329	0		0.3	0.996169	0.653257	0.00383142	0.00383142		0.7	0.996241	0.996241	0.291353	0.0056391
	0.15	0.38	0.26	0.02	0		0.3	0.992405	0.559494	0.00506329	0.00253165		0.3	0.994475	0.399632	0.00552486	0.00552486		0.7	0.998138	1	0.741155	0.00558659
	0.15	0.1262	0.0095	0.0012	0		0.3	0.996516	0.574913	0.00348432	0.00348432		0.3	0.994475	0.445672	0.00552486	0.00736648		0.7	0.994413	0.996276	0.0409683	0.0111732
	0.15	0.0106	0	0	0		0.3	0.6633	0.444444	0.121212	0.00673401		0.3	1	0.097619	0.00714286	0		0.75	0.990446	0.907643	0.464968	0.089172
	0.15	0.0378	0	0	0		0.3	0.403361	0.215686	0.0364146	0.00840336		0.300699	0.991573	0.856742	0.401685	0.0393258		0.75	0.996835	0.949367	0.420886	0.0474684
	0.15	0.1209	0.0165	0	0		0.3	0.180602	0.0668896	0.0100334	0.00668896		0.34965	0.991573	0.912921	0.511236	0.103933		0.75	0.953488	0.950166	0.574751	0.129568
	0.15	0.316	0.0216	0.0043	0		0.300699	0.991189	0.801762	0.189427	0.00881057		0.35	1	0.238095	0.0047619	0.00238095		0.75	0.996764	0.938511	0.459547	0.0711974
	0.15	0.1229	0.0146	0.0021	0		0.34965	0.995595	0.863436	0.259912	0.0176211		0.4	0.994334	0.739377	0.232295	0.0311615		0.75	0.993421	0.993421	0.0131579	0.00986842
	0.15	0.1306	0.0028	0	0		0.35	0.620061	0.267477	0.0455927	0.00607903		0.4	0.993399	0.650165	0.161716	0.0132013		0.8	0.995012	0.997506	0.708229	0.00498753
	0.15	0.34891	0.0965732	0.0124611	0.00311526		0.35	0.996516	0.756098	0.00696864	0.00348432		0.4	0.993528	0.805825	0.262136	0.0323625		0.8	0.996241	0.99812	0.62218	0.0037594
	0.15	0.168157	0.00178891	0.00357782	0.00536673		0.35	0.760943	0.552189	0.198653	0.00673401		0.4	0.996711	0.779605	0.230263	0.0296053		0.8	0.996276	1	0.936685	0.0111732
	0.15	0.985689	0.318426	0.00536673	0.00715564		0.35	0.540616	0.313725	0.0672269	0.0140056		0.4	0.997506	0.992519	0.00249377	0.00498753		0.8	0.998138	0.996276	0.195531	0.0111732
	0.15	0.843206	0.0522648	0.00348432	0		0.35	0.274247	0.113712	0.0167224	0.00334448		0.4	0.995885	0.995885	0.0185185	0.00617284		0.875	0.996815	0.942675	0.576433	0.136943
	0.15	0.274038	0.120192	0.0288462	0.0192308		0.375	0.997468	0.982278	0.00506329	0.00253165		0.4	0.997942	0.985597	0.00411523	0.00205761		0.875	0.996835	0.981013	0.572785	0.085443
	0.15	0.193548	0.0766129	0.00806452	0.00806452		0.375	0.994937	0.936709	0.00506329	0.00253165		0.4	0.994361	0.996241	0.0037594	0.0018797		0.875	0.9701	0.9701	0.671096	0.182724
	0.151515	0.953416	0.052795	0.00310559	0.00621118		0.4	0.51	0.22	0.06	0.01		0.4	0.992337	0.994253	0.0268199	0.00766284		0.875	0.996764	0.964401	0.592233	0.116505
	0.151515	0.90378	0.402062	0.0171233	0.00687285		0.4	0.45	0.17	0.04	0.01		0.4	0.996169	0.980843	0.00383142	0.00191571		0.9	0.993421	0.993421	0.118421	0.00986842
	0.151515	0.911864	0.433898	0.020339	0.00677966		0.4	0.39	0.13	0.03	0.01		0.4	0.996317	0.944751	0.00552486	0.00736648		0.9	0.997506	0.997506	0.915212	0.00498753
	0.151515	0.921233	0.44863	0.0171233	0.00684932		0.4	0.729483	0.370821	0.0911854	0.0151976		0.4	0.998158	0.952118	0.00552486	0.00552486		0.9	0.99812	0.99812	0.853383	0.0056391
	0.175	0.78	0.6	0.1	0		0.4	0.996491	0.996491	0	0		0.4	1	0.414286	0.0119048	0.0047619		0.9	0.994413	0.998138	0.986965	0.0204842
	0.175	0.5	0.29	0.03	0		0.4	1	0.874564	0.0174216	0.00348432		0.400932	0.991573	0.946629	0.620787	0.168539		0.9	0.998138	0.998138	0.47486	0.0111732
	0.198135	0.990683	0.31677	0.00310559	0.00621118		0.4	0.838384	0.656566	0.292929	0.00673401		0.449883	0.991573	0.963483	0.699438	0.230337		1	0.993631	0.961783	0.665605	0.187898
	0.198135	0.969072	0.642612	0.0616438	0.0103093		0.4	0.647059	0.428571	0.12605	0.0140056		0.45	0.993421	0.703947	0.0131579	0.00657895		1	1	0.993671	0.699367	0.139241
	0.198135	0.972881	0.661017	0.0711864	0.00677966		0.4	0.374582	0.187291	0.0334448	0.00668896		0.45	0.996732	0.905229	0.0130719	0.0163399		1	0.983389	0.983389	0.747508	0.232558
	0.198135	0.976027	0.674658	0.0719178	0.00684932		0.400932	0.995595	0.911894	0.343612	0.0264317		0.45	0.996732	0.437908	0.00980392	0.0130719		1	0.996764	0.980583	0.692557	0.171521
	0.2	0.83	0.65	0.16	0		0.449883	0.995595	0.938326	0.414097	0.0396476		0.45	0.997619	0.585714	0.0357143	0.0047619		1	0.997506	0.997506	0.977556	0.00997506
	0.2	0.58	0.38	0.06	0		0.45	0.808511	0.474164	0.136778	0.0243161		0.498834	0.994382	0.974719	0.755618	0.300562		1	0.996241	1	0.962406	0.0018797
	0.2	0.219	0.0345	0.006	0		0.45	0.994937	0.994937	0.00506329	0.00253165		0.5	0.997167	0.838527	0.348442	0.0566572		1	0.994413	1	0.994413	0.0689013
	0.2	0.037	0	0	0		0.45	0.997468	0.994937	0.00506329	0		0.5	0.9967	0.775578	0.257426	0.0363036		1	0.996276	0.996276	0.739292	0.00931099
	0.2	0.0882	0.0126	0	0		0.45	1	0.940767	0.0418118	0.00348432		0.5	0.993528	0.89644	0.398058	0.0582524		1.05	0.996711	0.993421	0.401316	0.00657895
	0.2	0.3022	0.0385	0	0		0.45	0.902357	0.750842	0.383838	0.00673401		0.5	0.996711	0.875	0.365132	0.0526316		1.1	0.997506	0.997506	0.992519	0.0448878
	0.2	0.4372	0.0823	0.0216	0		0.45	0.728291	0.52381	0.173669	0.0140056		0.5	0.995012	0.992519	0.0149626	0.00249377		1.1	0.994361	0.99812	0.988722	0.0112782
	0.2	0.2188	0.0292	0.0083	0		0.45	0.471572	0.257525	0.0468227	0.00668896		0.5	0.995885	0.995885	0.220165	0.00823045		1.1	0.990689	1	0.998138	0.188082
	0.2	0.2194	0.0417	0.0028	0		0.498834	0.995595	0.960352	0.488987	0.0572687		0.5	0.995885	0.997942	0.0144033	0.00411523		1.1	0.996276	0.996276	0.901304	0.00931099
	0.2	0.55	0.24	0.066	0.014		0.5	0.61	0.3	0.09	0.02		0.5	0.996241	0.994361	0.0394737	0.0018797		1.125	0.993631	0.977707	0.735669	0.242038
	0.2	0.41	0.15	0.035	0.009		0.5	0.55	0.24	0.06	0.01		0.5	0.996169	0.994253	0.306513	0.00574713		1.125	1	0.996835	0.797468	0.202532
	0.2	0.32	0.1	0.03	0.01		0.5	0.49	0.2	0.05	0.01		0.5	1	0.992337	0.0114943	0.00383142		1.125	0.986711	0.986711	0.803987	0.295681
	0.2	0.26	0.07	0.02	0.01		0.5	0.863222	0.56535	0.194529	0.0455927		0.5	0.996317	0.998158	0.00736648	0.00552486		1.125	0.996764	0.987055	0.770227	0.226537
	0.2	0.65109	0.280374	0.0560748	0.00934579		0.5	0.992982	0.996491	0.0245614	0		0.5	0.996317	0.994475	0.00736648	0.00368324		1.2	0.996711	0.993421	0.720395	0.00657895
	0.2	0.996491	0.333333	0	0.00350877		0.5	0.996516	0.968641	0.0766551	0.00696864		0.5	1	0.721429	0.0714286	0.00238095		1.2	0.997506	0.997506	0.997506	0.134663
	0.2	0.994792	0.697917	0.0078125	0.00520833		0.5	0.929293	0.814815	0.47138	0.010101		0.55	0.997619	0.830952	0.12619	0.00238095		1.2	0.996241	0.99812	0.99812	0.0469925
	0.2	0.966146	0.09375	0.00260417	0.00260417		0.5	0.792717	0.605042	0.2493	0.0168067		0.550117	0.991573	0.980337	0.800562	0.359551		1.2	0.996276	0.998138	0.998138	0.368715
	0.2	0.965157	0.181185	0.00348432	0.00348432		0.5	0.555184	0.331104	0.0802676	0.00668896		0.599068	0.991573	0.985955	0.839888	0.412921		1.2	0.996276	0.994413	0.968343	0.018622
	0.2	0.5	0.283654	0.0673077	0.0192308		0.525	0.994937	0.997468	0.0582278	0		0.6	0.997167	0.898017	0.456091	0.0934844		1.25	0.996815	0.984076	0.792994	0.296178
	0.2	0.395161	0.197581	0.0282258	0.00806452		0.525	0.992405	0.997468	0.0151899	0		0.6	0.993399	0.848185	0.363036	0.0627063		1.25	0.996835	0.996835	0.870253	0.272152
	0.225	0.88	0.7	0.27	0.009		0.55	0.902736	0.650456	0.255319	0.0699088		0.6	0.996764	0.938511	0.517799	0.0970874		1.25	0.990033	0.993355	0.853821	0.348837
	0.225	0.64	0.48	0.08	0		0.55	1	0.982578	0.12892	0.0139373		0.6	0.996711	0.924342	0.476974	0.0888158		1.25	0.996764	0.993528	0.828479	0.28479
	0.225	0.915921	0.0679785	0.00536673	0.00357782		0.55	0.952862	0.858586	0.552189	0.013468		0.6	0.993421	0.993421	0.00986842	0.00986842		1.3	0.997506	0.997506	0.997506	0.289277
	0.225	0.998211	0.9678	0.00536673	0.00536673		0.55	0.845938	0.683473	0.313725	0.0196078		0.6	0.996732	0.993464	0.0163399	0.0130719		1.3	0.996241	0.996241	0.996241	0.140977
	0.249417	0.990683	0.611801	0.0217391	0.00310559		0.55	0.628763	0.411371	0.113712	0.00668896		0.6	1	0.941176	0.00980392	0.0130719		1.3	0.996276	0.994413	0.998138	0.569832
	0.249417	0.993127	0.786942	0.136986	0.00687285		0.550117	0.995595	0.969163	0.555066	0.0792952		0.6	0.997506	0.997506	0.17207	0		1.3	0.996276	0.994413	0.990689	0.0502793
	0.249417	0.989831	0.80678	0.149153	0.0101695		0.599068	0.995595	0.977974	0.60793	0.101322		0.6	0.997942	0.995885	0.644033	0.00617284		1.35	0.993421	0.993421	0.914474	0.00657895
	0.249417	0.986301	0.821918	0.160959	0.010274		0.6	0.7	0.38	0.13	0.02		0.6	1	0.997942	0.156379	0		1.375	0.996815	0.990446	0.83758	0.350318
	0.25	0.92	0.73	0.33	0.027		0.6	0.64	0.32	0.1	0.02		0.6	0.99812	0.996241	0.295113	0.0018797		1.375	0.996835	0.996835	0.914557	0.341772
	0.25	0.72	0.57	0.1	0		0.6	0.58	0.27	0.07	0.02		0.6	0.996169	0.996169	0.741379	0.00574713		1.375	0.993355	0.993355	0.883721	0.398671
	0.25	0.819315	0.482866	0.143302	0.0311526		0.6	0.933131	0.714286	0.319149	0.100304		0.6	1	0.994253	0.14751	0.00191571		1.375	0.996764	0.996764	0.873786	0.343042
	0.25	0.996516	0.372822	0.00348432	0.00348432		0.6	0.992982	0.992982	0.224561	0		0.6	0.996317	0.996317	0.0441989	0.00552486		1.4	0.997506	0.995012	0.992519	0.46384
	0.25	0.663462	0.447115	0.144231	0.0192308		0.6	0.997468	0.994937	0.243038	0.00253165		0.6	0.996317	0.994475	0.0460405	0.00552486		1.4	0.996241	0.996241	0.99812	0.278195
	0.25	0.572581	0.350806	0.0806452	0.00806452		0.6	0.994937	0.997468	0.0911392	0.00506329		0.6	1	0.904762	0.192857	0.0119048		1.4	0.998138	0.996276	0.998138	0.756052
	0.275	0.93	0.78	0.39	0.027		0.6	1	0.989547	0.198606	0.0243902		0.65	1	0.942857	0.261905	0.0214286		1.4	0.998138	1	0.992551	0.113594
	0.275	0.72	0.62	0.14	0.01		0.6	0.96633	0.895623	0.622896	0.013468		0.65035	0.994382	0.985955	0.873596	0.466292		1.5	0.996815	0.993631	0.869427	0.404459
	0.3	0.94	0.83	0.44	0.054		0.6	0.890756	0.747899	0.37535	0.0168067		0.7	0.997167	0.934844	0.552408	0.141643		1.5	0.996835	0.993671	0.939873	0.408228
	0.3	0.79	0.66	0.18	0.02		0.6	0.692308	0.481605	0.150502	0.00668896		0.7	0.993399	0.89769	0.462046	0.0924092		1.5	0.996678	0.996678	0.910299	0.448505
	0.3	0.3488	0.0679	0.0571	0.0036		0.65	0.954407	0.765957	0.382979	0.136778		0.7	0.996764	0.964401	0.614887	0.142395		1.5	0.996764	1	0.906149	0.398058
	0.3	0.164	0.0053	0.0053	0		0.65	0.996516	0.993031	0.285714	0.0452962		0.7	0.996711	0.960526	0.582237	0.128289		1.5	0.996711	0.996711	0.976974	0.00657895
	0.3	0.2437	0.0252	0.0126	0		0.65	0.979798	0.929293	0.693603	0.026936		0.7	0.997506	0.997506	0.513716	0.00249377		1.5	0.995012	0.995012	0.997506	0.633416
	0.3	0.478	0.0604	0.0604	0		0.65	0.915966	0.789916	0.439776	0.0196078		0.7	0.995885	0.995885	0.923868	0.00205761		1.5	0.99812	0.994361	0.99812	0.43797
	0.3	0.5065	0.1688	0.1429	0.013		0.65	0.752508	0.551839	0.200669	0.00668896		0.7	0.997942	0.997942	0.497942	0.00411523		1.5	0.998138	0.998138	0.996276	0.871508
	0.3	0.3167	0.0708	0.0521	0.0063		0.65035	0.995595	0.986784	0.656388	0.127753		0.7	0.996241	0.994361	0.672932	0.0037594		1.5	0.996276	0.998138	0.996276	0.232775
	0.3	0.3917	0.0639	0.0639	0		0.675	0.994937	0.994937	0.526582	0.00506329		0.7	0.998084	0.994253	0.948276	0.00766284		1.6	0.997506	0.997506	0.997506	0.778055
	0.3	0.73	0.41	0.152	0.035		0.675	0.997468	0.994937	0.286076	0.00506329		0.7	0.996169	0.994253	0.469349	0.00383142		1.6	0.994361	0.994361	0.99812	0.607143
	0.3	0.6	0.29	0.089	0.022		0.7	0.76	0.45	0.18	0.04		0.7	1	0.994475	0.243094	0.00552486		1.6	0.996276	1	0.992551	0.918063
	0.3	0.51	0.21	0.05	0.02		0.7	0.71	0.39	0.13	0.03		0.7	0.994475	0.992634	0.246777	0.0092081		1.6	0.998138	1	0.996276	0.379888
	0.3	0.43	0.16	0.04	0.01		0.7	0.65	0.33	0.1	0.02		0.7	0.997619	0.969048	0.342857	0.0333333		1.625	0.996815	0.993631	0.894904	0.452229
	0.3	0.915888	0.666667	0.277259	0.0809969		0.7	0.966565	0.81459	0.452888	0.173252		0.701632	0.991573	0.988764	0.901685	0.516854		1.625	0.996835	0.996835	0.968354	0.474684
	0.3	0.992982	0.982456	0	0.00350877		0.7	0.992982	0.996491	0.607018	0		0.75	0.993421	0.996711	0.0296053	0.00657895		1.625	0.996678	0.996678	0.930233	0.495017
	0.3	0.994792	0.992188	0.00520833	0.00520833		0.7	0.996516	0.996516	0.365854	0.0627178		0.75	0.993464	0.996732	0.156863	0.0130719		1.625	0.996764	0.996764	0.928803	0.453074
	0.3	0.994792	0.914062	0.00520833	0.00260417		0.7	0.989899	0.946128	0.737374	0.03367		0.75	0.996732	0.993464	0.00980392	0.0130719		1.65	0.996711	0.993421	0.990132	0.0361842
	0.3	0.996422	0.615385	0.00536673	0.00357782		0.7	0.929972	0.829132	0.501401	0.0196078		0.75	1	0.978571	0.421429	0.0547619		1.7	0.997506	0.995012	0.997506	0.877805
	0.3	0.996422	0.996422	0.0214669	0.00536673		0.7	0.792642	0.608696	0.244147	0.00668896		0.750583	0.991573	0.991573	0.921348	0.567416		1.7	0.996241	0.99812	0.996241	0.742481
	0.3	0.996516	0.578397	0.00348432	0.00348432		0.701632	0.995595	0.986784	0.704846	0.15859		0.799534	0.991573	0.991573	0.935393	0.609551		1.7	0.998138	0.996276	0.994413	0.962756
	0.3	0.783654	0.591346	0.240385	0.0192308		0.75	0.978723	0.851064	0.510638	0.215805		0.8	0.997167	0.957507	0.640227	0.184136		1.7	0.996276	1	0.996276	0.532588
	0.3	0.709677	0.491935	0.157258	0.00806452		0.75	0.994937	0.994937	0.76962	0.00506329		0.8	0.9967	0.930693	0.547855	0.125413		1.75	0.996815	0.993631	0.920382	0.5
	0.300699	0.990683	0.829193	0.0714286	0.00621118		0.75	0.997468	0.994937	0.534177	0.00506329		0.8	0.996764	0.977346	0.702265	0.194175		1.75	0.996835	0.996835	0.977848	0.537975
	0.300699	0.993127	0.872852	0.226027	0.0137457		0.75	0.989899	0.956229	0.781145	0.040404		0.8	0.996711	0.973684	0.667763	0.177632		1.75	0.996678	0.996678	0.946844	0.541528
	0.300699	0.99322	0.898305	0.250847	0.0169492		0.75	0.946779	0.862745	0.563025	0.0196078		0.8	0.997506	0.997506	0.815461	0.00249377		1.75	0.996764	0.996764	0.94822	0.501618
	0.300699	0.993151	0.900685	0.267123	0.0136986		0.75	0.832776	0.662207	0.294314	0.00668896		0.8	0.995885	0.997942	0.985597	0.0123457		1.8	1	0.996711	0.990132	0.111842
	0.325	0.96	0.85	0.51	0.063		0.750583	0.995595	0.991189	0.748899	0.185022		0.8	0.995885	0.997942	0.800412	0.00617284		1.8	0.997506	0.997506	0.997506	0.935162
	0.325	0.81	0.72	0.23	0.02		0.799534	0.995595	0.995595	0.779736	0.215859		0.8	0.996241	0.996241	0.896617	0.0037594		1.8	0.996241	0.99812	0.994361	0.847744
	0.34965	0.990683	0.934783	0.167702	0.00621118		0.8	0.81	0.51	0.21	0.06		0.8	1	0.998084	0.988506	0.0268199		1.8	0.996276	0.996276	0.996276	0.992551
	0.34965	0.993127	0.927835	0.321918	0.0206186		0.8	0.76	0.45	0.17	0.04		0.8	1	0.994253	0.785441	0.00574713		1.8	0.994413	1	0.998138	0.67784
	0.34965	0.99322	0.942373	0.355932	0.0271186		0.8	0.71	0.39	0.13	0.03		0.8	0.996317	0.998158	0.578269	0.00368324		1.875	0.993631	0.993631	0.93949	0.544586
	0.34965	0.993151	0.945205	0.386986	0.0239726		0.8	0.984802	0.884498	0.568389	0.255319		0.8	0.994475	0.994475	0.574586	0.00736648		1.875	0.996835	0.996835	0.987342	0.594937
	0.35	0.96	0.88	0.56	0.099		0.8	0.996491	0.996491	0.873684	0		0.8	0.997619	0.990476	0.504762	0.0761905		1.875	0.996678	0.996678	0.956811	0.581395
	0.35	0.84	0.72	0.26	0.03		0.8	0.989899	0.962963	0.821549	0.0606061		0.848485	0.991573	0.994382	0.946629	0.651685		1.875	0.996764	0.996764	0.957929	0.550162
	0.35	0.959502	0.785047	0.423676	0.155763		0.8	0.960784	0.89916	0.610644	0.022409		0.85	0.997619	0.997619	0.57619	0.104762		1.9	0.997506	0.997506	0.997506	0.967581
	0.35	0.996516	0.749129	0.0174216	0.00348432		0.8	0.862876	0.702341	0.341137	0.00668896		0.899767	0.991573	0.994382	0.957865	0.682584		1.9	0.99812	0.99812	0.994361	0.919173
	0.35	0.865385	0.711538	0.336538	0.0144231		0.825	0.997468	0.994937	0.913924	0.00253165		0.9	0.997167	0.974504	0.708215	0.229462		1.9	0.998138	0.998138	0.998138	0.992551
	0.35	0.806452	0.612903	0.258065	0.00806452		0.825	0.992405	0.994937	0.764557	0.00253165		0.9	0.993399	0.950495	0.613861	0.168317		1.9	0.994413	1	0.996276	0.793296
	0.375	0.96	0.9	0.6	0.135		0.848485	0.995595	0.995595	0.810573	0.246696		0.9	0.996764	0.987055	0.763754	0.245955		1.95	0.996711	0.996711	0.996711	0.256579
	0.375	0.86	0.75	0.29	0.04		0.85	0.990881	0.905775	0.620061	0.303951		0.9	0.996711	0.980263	0.736842	0.223684		2	0.993631	0.996815	0.949045	0.582803
	0.375	0.996422	0.948122	0.00715564	0.00357782		0.85	0.996633	0.969697	0.855219	0.0740741		0.9	0.996711	0.996711	0.217105	0.00328947		2	0.996835	0.996835	0.993671	0.64557
	0.375	0.998211	0.998211	0.252236	0.00894454		0.85	0.971989	0.910364	0.661064	0.0252101		0.9	0.993464	0.996732	0.51634	0.0130719		2	0.996678	0.996678	0.966777	0.61794
	0.4	0.97	0.91	0.65	0.153		0.85	0.889632	0.742475	0.391304	0.00668896		0.9	1	0.993464	0.0686275	0.0130719		2	0.996764	1	0.967638	0.598706
	0.4	0.88	0.79	0.31	0.05		0.899767	0.995595	0.995595	0.837004	0.281938		0.9	0.997506	0.997506	0.952618	0.00249377		2	0.997506	0.997506	0.997506	0.985037
	0.4	0.4143	0.125	0.1036	0.0155		0.9	0.84	0.57	0.26	0.07		0.9	0.997942	0.997942	0.995885	0.0761317		2	0.99812	1	0.996241	0.953008
	0.4	0.3122	0.0265	0.0106	0		0.9	0.8	0.5	0.21	0.05		0.9	0.997942	0.997942	0.944444	0.00411523		2	1	0.998138	0.996276	0.994413
	0.4	0.4286	0.0588	0.0294	0.0042		0.9	0.75	0.45	0.17	0.04		0.9	0.994361	0.99812	0.979323	0.0056391		2	1	1	0.998138	0.869646
	0.4	0.5165	0.1813	0.0824	0.022		0.9	0.993921	0.927052	0.665653	0.349544		0.9	1	0.994253	0.990421	0.12069		2.1	0.996711	0.996711	0.993421	0.411184
	0.4	0.4026	0.2294	0.2727	0.0346		0.9	0.996491	0.996491	0.975439	0		0.9	0.998084	0.998084	0.942529	0.00766284		2.125	0.993631	0.993631	0.958599	0.617834
	0.4	0.3792	0.125	0.1021	0.0167		0.9	0.997468	0.997468	0.972152	0.00253165		0.9	0.994475	0.996317	0.837937	0.00552486		2.125	1	0.996835	0.996835	0.689873
	0.4	0.4611	0.125	0.1056	0.0139		0.9	0.997468	0.997468	0.906329	0.00759494		0.9	0.994475	0.994475	0.836096	0.00368324		2.125	0.996678	0.996678	0.9701	0.651163
	0.4	0.83	0.55	0.25	0.07		0.9	0.996633	0.969697	0.878788	0.0875421		0.9	0.997619	0.997619	0.642857	0.135714		2.125	0.996764	1	0.97411	0.634304
	0.4	0.73	0.41	0.15	0.04		0.9	0.985994	0.929972	0.703081	0.0252101		0.948718	0.991573	0.994382	0.963483	0.710674		2.25	0.996815	0.993631	0.964968	0.649682
	0.4	0.64	0.32	0.1	0.02		0.9	0.916388	0.782609	0.428094	0.0100334		0.95	0.997619	1	0.702381	0.180952		2.25	0.996835	1	0.996835	0.734177
	0.4	0.56	0.26	0.07	0.02		0.948718	0.995595	0.995595	0.859031	0.317181		0.997669	0.991573	0.994382	0.969101	0.735955		2.25	1	1	0.976744	0.681063
	0.4	0.978193	0.872274	0.548287	0.252336		0.95	0.996633	0.973064	0.89899	0.111111		1	0.997167	0.983003	0.759207	0.27762		2.25	0.996764	1	0.977346	0.669903
	0.4	0.996491	0.996491	0.0140351	0		0.95	0.991597	0.941176	0.736695	0.0336134		1	0.993399	0.963696	0.676568	0.20462		2.25	0.996711	0.996711	0.993421	0.585526
	0.4	0.992188	0.997396	0.148438	0.0078125		0.95	0.926421	0.80602	0.474916	0.0100334		1	1	0.993528	0.815534	0.297735		2.375	0.993631	0.996815	0.964968	0.678344
	0.4	0.997396	0.992188	0.00520833	0.00520833		0.975	0.997468	0.994937	0.989873	0.0202532		1	0.996711	0.990132	0.789474	0.273026		2.375	0.996835	1	1	0.762658
	0.4	0.996516	0.850174	0.0313589	0.00348432		0.975	0.994937	0.997468	0.967089	0.0202532		1	0.995012	0.997506	0.990025	0.0249377		2.375	0.996678	0.996678	0.980066	0.710963
	0.4	0.913462	0.793269	0.442308	0.0192308		0.997669	0.995595	0.995595	0.876652	0.343612		1	1	0.997942	0.997942	0.226337		2.375	0.996764	0.996764	0.983819	0.705502
	0.4	0.870968	0.709677	0.342742	0.00806452		1	0.87	0.62	0.31	0.09		1	1	1	0.985597	0.0102881		2.4	0.996711	0.993421	0.996711	0.736842
	0.400932	0.990683	0.968944	0.301242	0.00310559		1	0.83	0.56	0.24	0.06		1	0.99812	0.99812	0.994361	0.037594		2.5	0.996815	0.996815	0.971338	0.707006
	0.400932	0.996564	0.962199	0.417808	0.0343643		1	0.79	0.49	0.2	0.05		1	1	1	0.990421	0.312261		2.5	0.996835	0.996835	1	0.794304
	0.400932	0.99322	0.959322	0.461017	0.0474576		1	1	1	0.992982	0.0245614		1	1	0.996169	0.98659	0.0114943		2.5	0.996678	0.996678	0.983389	0.730897
	0.400932	0.993151	0.965753	0.493151	0.0376712		1	0.996633	0.976431	0.909091	0.13468		1	0.996317	0.996317	0.952118	0.00552486		2.5	0.993528	0.996764	0.990291	0.728155
	0.425	0.98	0.92	0.68	0.207		1	0.997199	0.955182	0.770308	0.0420168		1	0.996317	0.994475	0.952118	0.00552486		2.55	1	0.993421	0.996711	0.845395
	0.425	0.91	0.81	0.35	0.06		1	0.939799	0.832776	0.51505	0.0100334		1	0.997619	1	0.747619	0.209524		2.7	0.996711	0.996711	0.996711	0.917763
	0.449883	0.990683	0.984472	0.450311	0.00621118		1.05	0.997468	0.997468	0.994937	0.0607595		1.05	0.993421	0.996711	0.552632	0.00328947		2.85	0.996711	0.993421	1	0.957237
	0.449883	0.996564	0.972509	0.506849	0.0515464		1.05	0.997468	0.997468	0.992405	0.0607595		1.05	0.996732	0.996732	0.859477	0.00980392		3	1	0.993421	1	0.976974
	0.449883	0.99322	0.979661	0.552542	0.0711864		1.05	0.996633	0.976431	0.929293	0.161616		1.05	1	0.996732	0.297386	0.0130719
	0.449883	0.993151	0.979452	0.589041	0.0684932		1.05	0.997199	0.960784	0.798319	0.0504202		1.1	1	0.985836	0.804533	0.325779
	0.45	0.99	0.93	0.72	0.243		1.05	0.949833	0.856187	0.561873	0.0133779		1.1	0.993399	0.973597	0.726073	0.244224
	0.45	0.92	0.83	0.38	0.08		1.1	1	1	0.996491	0.0982456		1.1	0.996764	0.996764	0.857605	0.349515
	0.45	0.990654	0.919003	0.663551	0.352025		1.1	0.996633	0.979798	0.942761	0.181818		1.1	0.996711	0.993421	0.832237	0.322368
	0.45	0.996422	0.994633	0.00536673	0.00357782		1.1	0.997199	0.963585	0.831933	0.0560224		1.1	0.997506	0.997506	0.992519	0.0897756
	0.45	0.998211	0.998211	0.692308	0.00894454		1.1	0.963211	0.882943	0.595318	0.0167224		1.1	1	0.997942	0.997942	0.427984
	0.45	1	0.916376	0.0696864	0.00348432		1.125	0.997468	0.997468	0.994937	0.131646		1.1	0.997942	0.997942	0.995885	0.0493827
	0.45	0.942308	0.846154	0.538462	0.0192308		1.125	0.994937	0.997468	0.997468	0.136709		1.1	0.99812	0.996241	0.994361	0.12218
	0.45	0.91129	0.790323	0.439516	0.00806452		1.15	0.996633	0.983165	0.949495	0.205387		1.1	1	1	0.990421	0.544061
	0.475	0.99	0.93	0.77	0.324		1.15	1	0.969188	0.854342	0.0728291		1.1	1	0.996169	0.992337	0.0536398
	0.475	0.92	0.85	0.44	0.09		1.15	0.9699	0.896321	0.628763	0.0200669		1.1	1	0.998158	0.987109	0.0184162
	0.498834	0.990683	0.987578	0.580745	0.015528		1.2	0.996491	1	0.996491	0.235088		1.1	0.996317	0.992634	0.985267	0.00368324
	0.498834	0.996564	0.982818	0.585616	0.0790378		1.2	0.997468	0.997468	0.997468	0.248101		1.2	1	0.991501	0.835694	0.368272
	0.498834	0.99322	0.983051	0.633898	0.105085		1.2	0.992405	0.997468	0.997468	0.24557		1.2	0.993399	0.976898	0.768977	0.283828
	0.498834	0.993151	0.982877	0.671233	0.10274		1.2	1	0.979798	0.956229	0.228956		1.2	0.996764	1	0.886731	0.391586
	0.5	0.99	0.95	0.8	0.333		1.2	1	0.971989	0.868347	0.0812325		1.2	0.996711	0.996711	0.871711	0.365132
	0.5	0.92	0.86	0.48	0.1		1.2	0.976589	0.909699	0.655518	0.0234114		1.2	0.996711	0.996711	0.845395	0.00328947
	0.5	0.89	0.65	0.34	0.11		1.275	0.994937	0.997468	0.994937	0.389873		1.2	1	0.996732	0.970588	0.00980392
	0.5	0.81	0.52	0.22	0.06		1.275	0.992405	0.997468	0.992405	0.392405		1.2	1	0.993464	0.611111	0.0130719
	0.5	0.73	0.42	0.15	0.04		1.3	0.996491	0.996491	0.996491	0.421053		1.2	0.997506	0.995012	0.995012	0.23192
	0.5	0.67	0.36	0.12	0.03		1.35	0.997468	0.997468	0.997468	0.536709		1.2	0.997942	0.997942	0.997942	0.654321
	0.5	0.990654	0.950156	0.750779	0.451713		1.35	0.992405	0.992405	0.997468	0.536709		1.2	0.997942	0.997942	0.995885	0.146091
	0.5	0.996491	0.992982	0.294737	0		1.4	1	1	0.996491	0.624561		1.2	0.996241	0.99812	0.996241	0.274436
	0.5	0.992188	0.994792	0.669271	0.00520833		1.425	0.997468	1	0.997468	0.678481		1.2	1	1	0.990421	0.747126
	0.5	0.994792	0.992188	0.0911458	0.00260417		1.425	0.992405	0.997468	1	0.673418		1.2	1	0.998084	0.992337	0.141762
	0.5	0.996516	0.95122	0.111498	0.00696864		1.5	0.996491	0.996491	0.996491	0.775439		1.2	0.998158	0.998158	0.990792	0.0478821
	0.5	0.961538	0.894231	0.620192	0.0240385		1.5	0.997468	0.994937	0.994937	0.779747		1.2	0.994475	0.994475	0.990792	0.00368324
	0.5	0.939516	0.842742	0.532258	0.0120968		1.5	0.992405	0.997468	0.997468	0.782278		1.3	0.997167	0.994334	0.869688	0.413598
	0.525	0.99	0.95	0.81	0.369		1.6	0.996491	0.996491	0.996491	0.880702		1.3	0.993399	0.980198	0.80198	0.323432
	0.525	0.92	0.89	0.52	0.11		1.7	0.996491	0.996491	0.996491	0.947368		1.3	1	1	0.909385	0.436893
	0.525	0.996422	0.998211	0.019678	0.00536673		1.8	0.996491	0.996491	0.996491	0.978947		1.3	0.996711	0.996711	0.894737	0.414474
	0.525	0.996422	0.998211	0.928444	0.00715564		1.9	1	0.996491	0.996491	0.989474		1.3	0.995012	0.995012	0.992519	0.408978
	0.55	0.99	0.95	0.83	0.378		2	0.996491	0.996491	0.992982	0.996491		1.3	0.997942	0.997942	0.997942	0.825103
	0.55	0.92	0.9	0.54	0.14								1.3	1	0.997942	0.995885	0.290123
	0.55	0.990654	0.965732	0.825545	0.548287								1.3	0.99812	0.994361	0.996241	0.473684
	0.55	1	0.968641	0.174216	0.0174216								1.3	1	1	0.992337	0.87931
	0.55	0.971154	0.923077	0.692308	0.0288462								1.3	1	0.998084	0.994253	0.289272
	0.55	0.959677	0.887097	0.600806	0.0120968								1.3	1	0.998158	0.992634	0.117864
	0.550117	0.990683	0.990683	0.695652	0.0310559								1.3	0.992634	0.994475	0.990792	0.00552486
	0.550117	0.996564	0.989691	0.65411	0.103093								1.35	1	0.993421	0.957237	0.00328947
	0.550117	0.99322	0.989831	0.698305	0.145763								1.35	0.996732	0.996732	0.993464	0.0424837
	0.550117	0.996575	0.986301	0.732877	0.14726								1.35	1	0.996732	0.856209	0.00980392
	0.575	0.99	0.96	0.85	0.387								1.4	0.997167	0.994334	0.889518	0.456091
	0.575	0.93	0.91	0.58	0.16								1.4	0.993399	0.983498	0.834983	0.363036
	0.599068	0.993789	0.993789	0.779503	0.0590062								1.4	1	0.996764	0.925566	0.482201
	0.599068	0.996564	0.993127	0.712329	0.137457								1.4	0.996711	0.996711	0.917763	0.457237
	0.599068	0.99661	0.989831	0.755932	0.186441								1.4	0.995012	0.995012	0.995012	0.608479
	0.599068	0.996575	0.986301	0.787671	0.191781								1.4	0.997942	0.997942	0.997942	0.915638
	0.6	0.99	0.96	0.86	0.414								1.4	1	0.993827	0.995885	0.475309
	0.6	0.94	0.92	0.6	0.18								1.4	1	0.994361	0.996241	0.657895
	0.6	0.4417	0.1702	0.2048	0.0905								1.4	1	1	0.992337	0.948276
	0.6	0.6243	0.0847	0.0741	0.0053								1.4	0.998084	0.998084	0.998084	0.475096
	0.6	0.5966	0.1639	0.0882	0.021								1.4	1	1	0.996317	0.246777
	0.6	0.3791	0.1978	0.3187	0.0714								1.4	0.992634	0.994475	0.992634	0.0165746
	0.6	0.1818	0.2251	0.342	0.2468								1.5	0.997167	0.994334	0.906516	0.492918
	0.6	0.4625	0.15	0.1917	0.0958								1.5	0.9967	0.990099	0.858086	0.39604
	0.6	0.4139	0.1972	0.2222	0.0833								1.5	0.996764	0.993528	0.941748	0.521036
	0.6	0.92	0.73	0.42	0.15								1.5	0.993421	0.996711	0.930921	0.496711
	0.6	0.86	0.61	0.29	0.09								1.5	1	0.990132	0.993421	0.0230263
	0.6	0.8	0.51	0.21	0.06								1.5	1	0.996732	0.993464	0.140523
	0.6	0.74	0.44	0.17	0.04								1.5	0.996732	0.993464	0.954248	0.00980392
	0.6	0.993769	0.978193	0.872274	0.626168								1.5	0.995012	0.997506	0.992519	0.755611
	0.6	0.992982	0.996491	0.726316	0.00350877								1.5	0.997942	0.997942	0.997942	0.962963
	0.6	0.994792	0.997396	0.950521	0.0078125								1.5	1	0.995885	0.995885	0.641975
	0.6	0.997396	0.992188	0.453125	0.00260417								1.5	0.99812	0.994361	0.99812	0.796992
	0.6	0.996422	0.998211	0.118068	0.00178891								1.5	1	1	0.990421	0.978927
	0.6	1	1	0.989267	0.00536673								1.5	0.998084	1	0.996169	0.649425
	0.6	0.996516	0.97561	0.240418	0.0243902								1.5	1	0.996317	0.994475	0.410681
	0.6	0.980769	0.947115	0.754808	0.0432692								1.5	0.992634	0.996317	0.990792	0.0423573
	0.6	0.975806	0.919355	0.669355	0.0201613								1.6	0.997167	0.994334	0.926346	0.526912
	0.65	0.996885	0.984424	0.909657	0.70405								1.6	0.993399	0.993399	0.881188	0.429043
	0.65	0.996516	0.982578	0.317073	0.0418118								1.6	0.996764	0.996764	0.951456	0.559871
	0.65	0.985577	0.951923	0.802885	0.0625								1.6	1	0.996711	0.944079	0.536184
	0.65	0.975806	0.935484	0.729839	0.0322581								1.6	0.995012	0.997506	0.992519	0.870324
	0.65035	0.990683	0.990683	0.841615	0.0900621								1.6	1	0.997942	1	0.983539
	0.65035	0.996564	0.993127	0.763699	0.175258								1.6	1	0.995885	0.995885	0.779835
	0.65035	0.99322	0.99322	0.80339	0.237288								1.6	0.99812	0.996241	0.996241	0.894737
	0.65035	1	0.989726	0.832192	0.236301								1.6	1	1	0.992337	0.988506
	0.675	0.996422	0.998211	0.322004	0.00357782								1.6	1	1	0.996169	0.783525
	0.675	0.996422	1	0.996422	0.00715564								1.6	1	1	0.994475	0.578269
	0.7	0.95	0.79	0.49	0.2								1.6	0.996317	0.996317	0.98895	0.0994475
	0.7	0.9	0.68	0.36	0.12								1.65	0.996711	0.996711	0.993421	0.0822368
	0.7	0.85	0.58	0.26	0.08								1.65	1	0.996732	0.996732	0.310458
	0.7	0.8	0.51	0.21	0.06								1.65	1	0.993464	0.990196	0.0196078
	0.7	0.996885	0.987539	0.934579	0.766355								1.7	0.997167	0.994334	0.94051	0.560907
	0.7	1	0.992982	0.947368	0								1.7	0.990099	0.9967	0.89769	0.465347
	0.7	0.997396	0.997396	0.994792	0.0286458								1.7	0.996764	0.996764	0.961165	0.592233
	0.7	0.997396	0.997396	0.799479	0.00520833								1.7	1	0.996711	0.957237	0.569079
	0.7	0.996516	0.989547	0.38676	0.0627178								1.7	0.995012	0.995012	0.995012	0.935162
	0.7	0.985577	0.961538	0.841346	0.0769231								1.7	0.997942	0.995885	1	0.993827
	0.7	0.983871	0.955645	0.774194	0.0403226								1.7	1	0.997942	0.995885	0.882716
	0.701632	0.993789	0.990683	0.885093	0.139752								1.7	0.996241	0.996241	0.996241	0.949248
	0.701632	0.996564	0.993127	0.80137	0.213058								1.7	1	1	0.992337	0.994253
	0.701632	0.99322	0.99322	0.850847	0.284746								1.7	1	0.998084	0.996169	0.881226
	0.701632	0.996575	0.993151	0.863014	0.280822								1.7	0.998158	0.998158	0.994475	0.723757
	0.75	0.996885	0.990654	0.953271	0.813084								1.7	0.992634	0.994475	0.98895	0.184162
	0.75	0.998211	0.994633	0.588551	0.00357782								1.8	0.997167	0.994334	0.949008	0.594901
	0.75	0.998211	0.994633	0.996422	0.0161002								1.8	0.9967	0.9967	0.917492	0.49505
	0.75	0.990385	0.971154	0.870192	0.0961538								1.8	0.996764	0.996764	0.967638	0.624595
	0.75	0.987903	0.959677	0.814516	0.0524194								1.8	0.996711	0.996711	0.963816	0.601974
	0.750583	0.990683	0.993789	0.913043	0.189441								1.8	1	0.996711	0.996711	0.217105
	0.750583	0.996564	0.993127	0.839041	0.257732								1.8	1	0.996732	0.996732	0.522876
	0.750583	0.99322	0.99322	0.874576	0.332203								1.8	1	0.996732	0.993464	0.0555556
	0.750583	1	0.989726	0.893836	0.332192								1.8	0.995012	0.997506	0.997506	0.972569
	0.799534	0.993789	0.993789	0.934783	0.254658								1.8	1	0.997942	0.997942	0.997942
	0.799534	1	0.996564	0.863014	0.302405								1.8	1	0.995885	0.99177	0.934156
	0.799534	0.99322	0.99322	0.901695	0.376271								1.8	0.99812	0.994361	0.99812	0.973684
	0.799534	1	0.989726	0.914384	0.390411								1.8	1	1	0.992337	0.998084
	0.8	0.3512	0.2071	0.2679	0.1738								1.8	0.998084	0.998084	0.996169	0.938697
	0.8	0.672	0.1746	0.1323	0.0212								1.8	0.996317	1	0.994475	0.836096
	0.8	0.4832	0.2605	0.2017	0.0546								1.8	0.994475	0.996317	0.990792	0.300184
	0.8	0.2033	0.2418	0.3736	0.1813								1.9	0.997167	0.997167	0.954674	0.623229
	0.8	0.0693	0.1515	0.3636	0.4156								1.9	0.9967	0.9967	0.924092	0.528053
	0.8	0.3854	0.2	0.2333	0.1813								1.9	0.996764	0.996764	0.97411	0.653722
	0.8	0.3056	0.2167	0.3139	0.1639								1.9	0.996711	0.996711	0.970395	0.631579
	0.8	0.97	0.83	0.55	0.25								1.9	0.995012	0.997506	1	0.987531
	0.8	0.92	0.73	0.41	0.16								1.9	1	0.993827	0.997942	0.995885
	0.8	0.88	0.64	0.31	0.09								1.9	1	0.997942	0.995885	0.969136
	0.8	0.84	0.57	0.27	0.08								1.9	0.99812	0.996241	0.99812	0.988722
	0.8	1	0.990654	0.965732	0.850467								1.9	0.998084	1	0.992337	1
	0.8	0.996491	1	0.992982	0.0140351								1.9	0.998084	0.998084	0.996169	0.971264
	0.8	0.997396	1	0.997396	0.145833								1.9	0.996317	0.996317	0.998158	0.902394
	0.8	0.994792	0.997396	0.960938	0.0078125								1.9	0.994475	0.998158	0.990792	0.430939
	0.8	0.990385	0.975962	0.894231	0.125								1.95	1	1	0.996711	0.391447
	0.8	0.987903	0.967742	0.846774	0.0766129								1.95	0.996732	0.996732	0.996732	0.715686
	0.825	0.996422	0.996422	0.792487	0.00178891								1.95	1	0.996732	1	0.143791
	0.825	0.998211	0.998211	0.994633	0.0626118								2	0.997167	0.997167	0.957507	0.648725
	0.848485	0.990683	0.993789	0.953416	0.313665								2	0.9967	0.9967	0.937294	0.554455
	0.848485	0.996564	0.996564	0.886986	0.340206								2	0.996764	0.996764	0.977346	0.679612
	0.848485	0.99322	0.99661	0.918644	0.430508								2	0.993421	0.993421	0.970395	0.654605
	0.848485	1	0.989726	0.931507	0.434932								2	0.997506	0.997506	1	0.995012
	0.85	1	0.993769	0.981308	0.884735								2	1	0.997942	0.997942	0.997942
	0.85	0.995192	0.980769	0.913462	0.144231								2	0.997942	0.997942	1	0.981481
	0.85	0.991935	0.971774	0.875	0.0927419								2	0.996241	0.996241	0.996241	0.996241
	0.899767	0.990683	0.990683	0.959627	0.378882								2	1	0.998084	0.992337	1
	0.899767	0.996564	0.996564	0.910959	0.378007								2	0.994253	0.996169	0.996169	0.98659
	0.899767	0.99661	0.99661	0.932203	0.471186								2	0.994475	0.996317	0.996317	0.937385
	0.899767	0.996575	0.993151	0.94863	0.486301								2	0.990792	1	0.998158	0.552486
	0.9	0.98	0.87	0.61	0.3								2.1	1	0.996711	0.996711	0.575658
	0.9	0.94	0.78	0.47	0.19								2.1	1	0.996732	0.996732	0.852941
	0.9	0.91	0.69	0.37	0.12								2.1	1	0.996732	0.996732	0.267974
	0.9	0.87	0.63	0.31	0.1								2.25	0.996711	0.996711	0.996711	0.730263
	0.9	1	0.993769	0.984424	0.909657								2.25	1	0.996732	0.996732	0.928105
	0.9	0.996491	1	0.992982	0.101754								2.25	1	0.996732	0.996732	0.428105
	0.9	0.997396	0.997396	0.994792	0.395833								2.4	0.996711	0.996711	1	0.851974
	0.9	0.997396	0.994792	0.989583	0.0234375								2.4	1	0.996732	0.993464	0.96732
	0.9	0.994633	0.996422	0.91771	0.00178891								2.4	0.996732	1	0.996732	0.591503
	0.9	0.998211	0.998211	0.996422	0.16458								2.55	1	1	0.996711	0.917763
	0.9	0.995192	0.985577	0.927885	0.173077								2.55	1	0.996732	0.996732	0.98366
	0.9	0.995968	0.975806	0.891129	0.112903								2.55	0.996732	0.996732	0.996732	0.745098
	0.948718	0.990683	0.990683	0.968944	0.437888								2.7	0.996711	1	1	0.960526
	0.948718	0.996564	0.996564	0.924658	0.42268								2.7	1	1	0.996732	0.990196
	0.948718	0.99661	0.99661	0.945763	0.508475								2.7	0.996732	1	0.996732	0.852941
	0.948718	0.996575	0.989726	0.958904	0.527397								2.85	0.996711	0.996711	1	0.980263
	0.95	0.995192	0.985577	0.9375	0.206731								2.85	1	1	0.996732	0.996732
	0.95	0.995968	0.979839	0.907258	0.141129								2.85	0.996732	1	0.996732	0.901961
	0.975	0.998211	0.998211	0.969589	0.00357782								3	0.996711	0.996711	1	0.993421
	0.975	0.998211	0.996422	0.992844	0.322004								3	0.996732	1	0.993464	1
	0.997669	0.990683	0.993789	0.97205	0.496894								3	0.996732	1	1	0.95098
	0.997669	0.996564	0.996564	0.938356	0.460481
	0.997669	0.99322	0.99661	0.955932	0.549153
	0.997669	0.996575	0.989726	0.965753	0.568493
	1	0.2	0.2167	0.3167	0.2667
	1	0.4339	0.3016	0.2063	0.0582
	1	0.2815	0.3109	0.3067	0.1008
	1	0.0769	0.1758	0.4011	0.3462
	1	0.0216	0.0823	0.3506	0.5455
	1	0.2146	0.2354	0.2917	0.2583
	1	0.1806	0.1917	0.35	0.2778
	1	0.98	0.89	0.65	0.35
	1	0.95	0.82	0.52	0.22
	1	0.92	0.73	0.42	0.15
	1	0.9	0.67	0.36	0.12
	1	0.996491	0.996491	0.992982	0.291228
	1	0.997396	0.997396	0.994792	0.664062
	1	0.997396	0.992188	0.992188	0.0859375
	1	0.995192	0.990385	0.947115	0.240385
	1	1	0.987903	0.927419	0.165323
	1.05	0.996422	0.998211	0.994633	0.0178891
	1.05	0.998211	1	0.994633	0.506261
	1.05	0.995192	0.990385	0.951923	0.264423
	1.05	1	0.991935	0.935484	0.189516
	1.1	0.996491	1	0.996491	0.536842
	1.1	0.997396	0.997396	0.994792	0.859375
	1.1	0.992188	0.992188	0.994792	0.229167
	1.1	0.995192	0.985577	0.956731	0.293269
	1.1	1	0.987903	0.943548	0.21371
	1.125	0.996422	0.998211	0.996422	0.0500894
	1.125	0.998211	0.998211	0.994633	0.677996
	1.15	0.995192	0.985577	0.961538	0.326923
	1.15	0.995968	0.991935	0.947581	0.245968
	1.2	0.1036	0.1952	0.3333	0.3679
	1.2	0.2222	0.3651	0.3069	0.1058
	1.2	0.1513	0.2773	0.3866	0.1849
	1.2	0.033	0.1154	0.3736	0.478
	1.2	0.013	0.0346	0.2684	0.684
	1.2	0.1125	0.2271	0.3229	0.3375
	1.2	0.0917	0.1528	0.3472	0.4083
	1.2	0.996491	1	0.996491	0.736842
	1.2	0.997396	0.994792	0.997396	0.950521
	1.2	0.994792	0.992188	0.997396	0.445312
	1.2	0.996422	0.996422	0.996422	0.100179
	1.2	0.994633	1	0.996422	0.810376
	1.2	0.995192	0.985577	0.971154	0.360577
	1.2	1	0.991935	0.959677	0.270161
	1.275	0.998211	0.994633	0.998211	0.194991
	1.275	0.998211	1	0.998211	0.90161
	1.3	1	0.996491	0.996491	0.877193
	1.3	0.997396	0.997396	0.997396	0.984375
	1.3	0.997396	0.992188	0.997396	0.651042
	1.35	0.994633	0.998211	0.994633	0.307692
	1.35	0.998211	1	0.996422	0.946333
	1.4	0.044	0.15	0.3607	0.4452
	1.4	0.1005	0.3069	0.4286	0.164
	1.4	0.063	0.2185	0.4622	0.2563
	1.4	0.0165	0.0604	0.3681	0.5549
	1.4	0	0.0216	0.1948	0.7835
	1.4	0.0438	0.1604	0.3813	0.4146
	1.4	0.0444	0.1361	0.3333	0.4861
	1.4	1	0.996491	0.996491	0.954386
	1.4	0.997396	0.997396	0.997396	0.997396
	1.4	0.997396	0.992188	0.997396	0.807292
	1.425	0.996422	0.998211	0.998211	0.443649
	1.425	0.998211	1	0.996422	0.973166
	1.5	1	1	1	0.985965
	1.5	0.994792	0.994792	0.992188	0.997396
	1.5	0.992188	0.992188	0.997396	0.914062
	1.5	0.998211	0.998211	0.998211	0.568873
	1.5	0.998211	0.998211	0.994633	0.991055
	1.6	0	0.125	0.3464	0.5286
	1.6	0	0.3069	0.4603	0.2328
	1.6	0	0.1555	0.5084	0.3361
	1.6	0	0.0385	0.322	0.6593
	1.6	0	0.013	0.1212	0.8658
	1.6	0	0.1417	0.3521	0.5063
	1.6	0	0.1028	0.3389	0.5583
	1.6	1	0.996491	0.992982	0.992982
	1.6	0.997396	0.994792	0.997396	0.997396
	1.6	0.997396	0.997396	0.997396	0.960938
	1.7	1	0.996491	0.996491	0.996491
	1.7	0.997396	0.997396	0.997396	0.997396
	1.7	0.997396	0.994792	0.997396	0.979167
	1.8	1	0.996491	1	0.996491
	1.8	0.994792	0.997396	0.997396	0.997396
	1.8	0.997396	0.997396	0.997396	0.984375
	1.9	1	1	1	0.996491
	1.9	0.992188	0.994792	0.992188	0.997396
	1.9	0.997396	0.994792	0.997396	0.992188
	2	1	1	0.996491	0.996491
	2	0.994792	0.997396	0.992188	0.997396
	2	0.997396	0.994792	0.997396	0.997396

## Sheet: Quantiles
soil-wood	damage state	Intensity	0.25	0.5	0.75	brick-wood	damage state	Intensity	0.25	0.5	0.75	brick-concrete_A	damage state	Intensity	0.25	0.5	0.75	brick-concrete_B	damage state	Intensity	0.25	0.5	0.75	brick-concrete_C	damage state	Intensity	0.25	0.5	0.75
	LS1	6	0.379	0.45	0.668		LS1	6	0.238	0.31	0.488		LS1	6	0.145	0.219	0.275		LS1	6	0.197	0.303	0.348		LS1	6	0.118	0.151	0.222
		7	0.659	0.805	0.835			7	0.579	0.69	0.72			7	0.366	0.514	0.713			7	0.361	0.474	0.635			7	0.147	0.257	0.471
		8	0.923	0.93	0.965			8	0.88	0.91	0.94			8	0.757	0.826	0.9			8	0.518	0.78	0.9			8	0.31	0.66	0.769
		9	0.975	0.998	1			9	0.953	1	1			9	0.817	0.958	0.99			9	0.744	0.915	0.992			9	0.452	0.794	0.907
		10	1	1	1			10	0.978	0.996	1			10	0.992	1	1			10	0.916	0.986	1			10	0.72	0.959	0.98
	LS2	6	0.138	0.18	0.411		LS2	6	0.0673	0.0964	0.222		LS2	6	0.00775	0.03	0.06		LS2	6	0.019	0.058	0.0761		LS2	6	0.005	0.0185	0.0373
		7	0.334	0.49	0.616			7	0.247	0.322	0.41			7	0.0717	0.188	0.347			7	0.0948	0.14	0.205			7	0.0245	0.077	0.171
		8	0.784	0.82	0.875			8	0.64	0.689	0.742			8	0.35	0.507	0.71			8	0.234	0.396	0.686			8	0.0683	0.175	0.474
		9	0.89	0.96	0.98			9	0.814	0.915	0.965			9	0.636	0.855	0.901			9	0.484	0.638	0.873			9	0.204	0.37	0.696
		10	0.987	1	1			10	0.93	1	1			10	0.947	1	1			10	0.729	0.898	0.987			10	0.422	0.74	0.933
	LS3	6	0.02	0.0318	0.128		LS3	6	0.00447	0.014	0.0486		LS3	6	0	0.001	0.0093		LS3	6	0	0.0118	0.0182		LS3	6	0	0.0029	0.0081
		7	0.148	0.23	0.36			7	0.05	0.0794	0.16			7	0.0006	0.0428	0.0659			7	0.0115	0.0442	0.0724			7	0.00475	0.0182	0.0447
		8	0.451	0.562	0.649			8	0.25	0.35	0.478			8	0.0832	0.152	0.38			8	0.0751	0.114	0.179			8	0.017	0.0697	0.226
		9	0.75	0.771	0.85			9	0.637	0.71	0.735			9	0.369	0.586	0.703			9	0.221	0.358	0.651			9	0.0519	0.154	0.409
		10	0.91	0.97	0.994			10	0.811	0.881	0.92			10	0.776	0.902	0.96			10	0.488	0.695	0.899			10	0.278	0.393	0.792
	LS4	6	0	0.0001	0.0231		LS4	6	0	0.0002	0.0121		LS4	6	0	0	0		LS4	6	0	0	0.00147		LS4	6	0	0	0.000725
		7	0.0378	0.05	0.15			7	0	0.0207	0.0483			7	0	0.0008	0.012			7	0	0.0069	0.013			7	0	0.0037	0.0064
		8	0.179	0.26	0.371			8	0.07	0.131	0.183			8	0.009	0.0242	0.06			8	0.0186	0.0291	0.0462			8	0.00323	0.0121	0.0202
		9	0.5	0.505	0.602			9	0.2	0.22	0.377			9	0.089	0.111	0.259			9	0.0704	0.0998	0.139			9	0.0146	0.05	0.0782
		10	0.731	0.87	0.897			10	0.638	0.639	0.655			10	0.288	0.525	0.619			10	0.221	0.313	0.59			10	0.0731	0.157	0.41
steel_RC_A	damage state	Intensity	0.25	0.5	0.75	steel_RC_B	damage state	Intensity	0.25	0.5	0.75
	LS1	6	0.06	0.12	0.168		LS1	6	0.05	0.05	0.1
		7	0.161	0.25	0.4			7	0.1	0.15	0.15
		8	0.45	0.574	0.75			8	0.3	0.475	0.5
		9	0.668	0.819	0.98			9	0.487	0.75	0.82
		10	0.85	0.977	1			10	0.775	0.95	0.98
	LS2	6	0	0	0.01		LS2	6	0	0	0
		7	0.00805	0.0222	0.097			7	0	0.015	0.02
		8	0.1	0.12	0.259			8	0.05	0.06	0.07
		9	0.38	0.484	0.73			9	0.162	0.33	0.44
		10	0.645	0.837	0.943			10	0.463	0.67	0.91
	LS3	6	0	0	0		LS3	6	0	0	0
		7	0	0	0.0094			7	0	0	0
		8	0.017	0.02	0.105			8	0	0.005	0.01
		9	0.09	0.168	0.236			9	0.0175	0.04	0.175
		10	0.26	0.546	0.776			10	0.132	0.27	0.65
	LS4	6	0	0	0		LS4	6	0	0	0
		7	0	0	0			7	0	0	0
		8	0	0.002	0.0146			8	0	0	0
		9	0.015	0.0215	0.039			9	0	0.005	0.025
		10	0.0775	0.163	0.25			10	0.04	0.05	0.2
analytical_mansory_A	damage state	PGA	0.25	0.5	0.75	analytical_mansory_B	damage state	PGA	0.25	0.5	0.75	analytical_steel_PGA_A	damage state	PGA	0.25	0.5	0.75	analytical_steel_PGA_B	damage state	PGA	0.25	0.5	0.75	analytical_steel_SA_A	damage state	SA	0.25	0.5	0.75	analytical_steel_SA_B	damage state	SA	0.25	0.5	0.75
	LS1	0.1	0.18	0.221	0.33		LS1	0.1	0.00865	0.0407	0.1		LS1	0.1	0.00851	0.0236	0.0402		LS1	0.1	0.00851	0.0236	0.0402		LS1	0.1	0.00368	0.0144	0.961		LS1	0.1	0.00219	0.00311	0.00559
		0.2	0.47	0.595	0.641			0.2	0.054	0.212	0.31			0.2	0.148	0.176	0.476			0.2	0.148	0.176	0.476			0.2	0.797	0.962	0.991			0.2	0.422	0.773	0.919
		0.3	0.66	0.765	0.856			0.3	0.19	0.428	0.49			0.3	0.325	0.498	0.993			0.3	0.325	0.498	0.993			0.3	0.993	0.994	0.996			0.3	0.918	0.994	0.997
		0.4	0.807	0.855	0.94			0.4	0.347	0.588	0.63			0.4	0.435	0.647	0.878			0.4	0.435	0.647	0.878			0.4	0.994	0.996	0.998			0.4	0.996	0.996	0.997
		0.5	0.89	0.916	0.97			0.5	0.5	0.69	0.769			0.5	0.554	0.793	0.945			0.5	0.554	0.793	0.945			0.5	0.996	0.996	0.997			0.5	0.994	0.996	0.997
		0.6	0.92	0.949	0.98			0.6	0.634	0.76	0.83			0.6	0.694	0.933	0.994			0.6	0.694	0.933	0.994			0.6	0.996	0.997	0.999			0.6	0.994	0.995	0.996
		0.7	0.95	0.968	0.99			0.7	0.733	0.81	0.87			0.7	0.748	0.93	0.991			0.7	0.748	0.93	0.991			0.7	0.996	0.997	0.998			0.7	0.995	0.996	0.997
		0.8	0.96	0.985	0.99			0.8	0.81	0.855	0.91			0.8	0.785	0.912	0.987			0.8	0.785	0.912	0.987			0.8	0.996	0.997	0.998			0.8	0.996	0.996	0.997
		0.9	0.97	0.986	0.997			0.9	0.861	0.89	0.93			0.9	0.84	0.99	0.997			0.9	0.84	0.99	0.997			0.9	0.994	0.997	0.998			0.9	0.994	0.998	0.998
		1	0.98	0.993	0.997			1	0.89	0.91	0.95			1	0.84	0.94	0.997			1	0.84	0.94	0.997			1	0.996	0.998	1			1	0.994	0.996	0.997
		1.1	0.996	0.997	0.997			1.1	0.849	0.932	0.974			1.1	0.98	0.997	0.999			1.1	0.98	0.997	0.999			1.1	0.997	0.998	1			1.1	0.993	0.995	0.997
		1.2	0.996	0.997	0.997			1.2	0.877	0.949	0.985			1.2	0.992	0.997	1			1.2	0.992	0.997	1			1.2	0.997	0.998	1			1.2	0.996	0.996	0.997
	LS2	0.1	0.0235	0.0625	0.1		LS2	0.1	0.00852	0.0157	0.02			1.3	0.996	0.996	0.996			1.3	0.996	0.996	0.996			1.3	0.996	0.998	1			1.3	0.996	0.996	0.997
		0.2	0.18	0.253	0.33			0.2	0.017	0.0509	0.09			1.4	1	1	1			1.4	1	1	1			1.4	0.996	0.998	1			1.4	0.997	0.998	0.998
		0.3	0.34	0.465	0.54			0.3	0.0313	0.143	0.2			1.5	0.993	0.996	0.997			1.5	0.993	0.996	0.997			1.5	0.997	0.998	1			1.5	0.997	0.997	0.997
		0.4	0.48	0.595	0.742			0.4	0.0852	0.254	0.31			1.6	0.996	0.996	0.996			1.6	0.996	0.996	0.996			1.6	0.997	0.999	1			1.6	0.995	0.997	0.998
		0.5	0.618	0.695	0.846			0.5	0.176	0.37	0.418			1.7	0.996	0.996	0.996			1.7	0.996	0.996	0.996			1.7	0.996	0.998	1			1.7	0.996	0.997	0.998
		0.6	0.73	0.768	0.89			0.6	0.267	0.45	0.545			1.8	0.996	0.996	0.996			1.8	0.996	0.996	0.996			1.8	0.997	0.998	1			1.8	0.996	0.996	0.998
		0.7	0.79	0.837	0.92			0.7	0.372	0.53	0.63			1.9	1	1	1			1.9	1	1	1			1.9	0.997	0.997	0.998			1.9	0.996	0.998	0.998
		0.8	0.83	0.884	0.95			0.8	0.463	0.59	0.69			2	0.996	0.996	0.996			2	0.996	0.996	0.996			2	0.994	0.997	0.998			2	0.997	0.997	0.999
		0.9	0.87	0.915	0.96			0.9	0.554	0.645	0.74		LS2	0.1	0.00228	0.004	0.00752		LS2	0.1	0.00228	0.004	0.00752			2.1	1	1	1			2.1	0.997	0.997	0.997
		1	0.89	0.935	0.97			1	0.619	0.695	0.78			0.2	0.03	0.0386	0.0727			0.2	0.03	0.0386	0.0727			2.2	NaN	NaN	NaN			2.2	NaN	NaN	NaN
		1.1	0.954	0.974	0.993			1.1	0.554	0.702	0.848			0.3	0.1	0.216	0.571			0.3	0.1	0.216	0.571			2.3	NaN	NaN	NaN			2.3	NaN	NaN	NaN
		1.2	0.954	0.976	0.997			1.2	0.603	0.747	0.885			0.4	0.183	0.371	0.711			0.4	0.183	0.371	0.711			2.4	0.997	0.997	0.999			2.4	0.997	0.997	0.997
	LS3	0.1	0.00671	0.015	0.02		LS3	0.1	0.00852	0.00932	0.01			0.5	0.285	0.565	0.853			0.5	0.285	0.565	0.853			2.5	NaN	NaN	NaN			2.5	0.995	0.997	0.997
		0.2	0.05	0.077	0.104			0.2	0.00852	0.0143	0.02			0.6	0.405	0.748	0.992			0.6	0.405	0.748	0.992			2.6	NaN	NaN	NaN			2.6	NaN	NaN	NaN
		0.3	0.11	0.18	0.289			0.3	0.00852	0.0387	0.05			0.7	0.435	0.815	0.959			0.7	0.435	0.815	0.959			2.7	0.997	0.997	0.999			2.7	0.997	0.997	0.997
		0.4	0.211	0.285	0.47			0.4	0.0199	0.0826	0.1			0.8	0.48	0.793	0.931			0.8	0.48	0.793	0.931			2.8	NaN	NaN	NaN			2.8	NaN	NaN	NaN
		0.5	0.33	0.387	0.57			0.5	0.054	0.125	0.19			0.9	0.57	0.929	0.996			0.9	0.57	0.929	0.996			2.9	NaN	NaN	NaN			2.9	NaN	NaN	NaN
		0.6	0.41	0.497	0.66			0.6	0.0994	0.18	0.25			1	0.575	0.833	0.971			1	0.575	0.833	0.971			3	0.997	0.997	0.997			3	1	1	1
		0.7	0.48	0.586	0.72			0.7	0.151	0.22	0.31			1.1	0.923	0.972	0.99			1.1	0.923	0.972	0.99		LS2	0.1	0.00187	0.00249	0.0437		LS2	0.1	0.00186	0.00374	0.0056
		0.8	0.55	0.662	0.78			0.8	0.222	0.275	0.37			1.2	0.972	0.989	0.997			1.2	0.972	0.989	0.997			0.2	0.0116	0.062	0.334			0.2	0.00407	0.00654	0.0345
		0.9	0.6	0.725	0.81			0.9	0.29	0.325	0.42			1.3	0.996	0.996	0.996			1.3	0.996	0.996	0.996			0.3	0.286	0.587	0.709			0.3	0.0822	0.504	0.688
		1	0.65	0.779	0.85			1	0.33	0.388	0.47			1.4	1	1	1			1.4	1	1	1			0.4	0.77	0.952	0.993			0.4	0.835	0.969	0.988
		1.1	0.853	0.908	0.963			1.1	0.29	0.42	0.626			1.5	0.995	0.996	0.997			1.5	0.995	0.996	0.997			0.5	0.866	0.993	0.995			0.5	0.741	0.905	0.992
		1.2	0.891	0.927	0.963			1.2	0.332	0.477	0.686			1.6	0.996	0.996	0.996			1.6	0.996	0.996	0.996			0.6	0.931	0.994	0.996			0.6	0.988	0.995	0.999
	LS4	0.1	0.002	0.00375	0.00671		LS4	0.1	0.001	0.00338	0.00852			1.7	0.996	0.996	0.996			1.7	0.996	0.996	0.996			0.7	0.963	0.994	0.995			0.7	0.996	0.996	0.998
		0.2	0.005	0.0184	0.02			0.2	0.00852	0.01	0.01			1.8	0.996	0.996	0.996			1.8	0.996	0.996	0.996			0.8	0.976	0.994	0.998			0.8	0.997	0.998	0.999
		0.3	0.03	0.05	0.0772			0.3	0.00576	0.01	0.0113			1.9	0.996	0.996	0.996			1.9	0.996	0.996	0.996			0.9	0.99	0.997	0.998			0.9	0.996	0.998	0.998
		0.4	0.05	0.09	0.18			0.4	0.01	0.0128	0.02			2	0.996	0.996	0.996			2	0.996	0.996	0.996			1	0.993	0.996	0.999			1	0.982	0.995	0.999
		0.5	0.1	0.136	0.26			0.5	0.017	0.03	0.0403		LS3	0.1	0.00075	0.00348	0.00623		LS3	0.1	0.00075	0.00348	0.00623			1.1	0.993	0.997	0.998			1.1	0.997	0.998	0.999
		0.6	0.15	0.199	0.33			0.6	0.017	0.045	0.0778			0.2	0.00301	0.007	0.0102			0.2	0.00301	0.007	0.0102			1.2	0.995	0.997	0.998			1.2	0.994	0.998	0.998
		0.7	0.2	0.272	0.4			0.7	0.0284	0.065	0.1			0.3	0.00506	0.01	0.0278			0.3	0.00506	0.01	0.0278			1.3	0.994	0.997	0.998			1.3	0.994	0.995	0.997
		0.8	0.24	0.339	0.48			0.8	0.0568	0.085	0.13			0.4	0.0269	0.04	0.0999			0.4	0.0269	0.04	0.0999			1.4	0.994	0.996	0.998			1.4	0.996	0.996	0.998
		0.9	0.31	0.413	0.52			0.9	0.0852	0.105	0.16			0.5	0.0575	0.0803	0.208			0.5	0.0575	0.0803	0.208			1.5	0.994	0.996	0.997			1.5	0.994	0.997	0.998
		1	0.33	0.471	0.57			1	0.1	0.132	0.19			0.6	0.108	0.199	0.3			0.6	0.108	0.199	0.3			1.6	0.996	0.997	0.999			1.6	0.996	0.999	1
		1.1	0.568	0.697	0.826			1.1	0.0865	0.151	0.319			0.7	0.167	0.366	0.528			0.7	0.167	0.366	0.528			1.7	0.995	0.997	0.998			1.7	0.996	0.997	0.999
		1.2	0.632	0.744	0.856			1.2	0.112	0.193	0.383			0.8	0.19	0.455	0.716			0.8	0.19	0.455	0.716			1.8	0.996	0.997	0.998			1.8	0.997	0.998	0.999
														0.9	0.26	0.684	0.906			0.9	0.26	0.684	0.906			1.9	0.997	0.997	0.998			1.9	0.998	0.998	0.999
														1	0.258	0.515	0.874			1	0.258	0.515	0.874			2	0.996	0.997	0.998			2	0.997	0.998	1
														1.1	0.714	0.887	0.97			1.1	0.714	0.887	0.97			2.1	0.997	0.997	0.997			2.1	0.997	0.997	0.997
														1.2	0.868	0.976	0.997			1.2	0.868	0.976	0.997			2.2	NaN	NaN	NaN			2.2	NaN	NaN	NaN
														1.3	0.996	0.996	0.996			1.3	0.996	0.996	0.996			2.3	NaN	NaN	NaN			2.3	NaN	NaN	NaN
														1.4	0.996	0.996	0.996			1.4	0.996	0.996	0.996			2.4	0.997	0.997	0.999			2.4	0.993	0.993	0.993
														1.5	0.995	0.996	0.997			1.5	0.995	0.996	0.997			2.5	NaN	NaN	NaN			2.5	0.997	0.997	0.997
														1.6	0.996	0.996	0.996			1.6	0.996	0.996	0.996			2.6	NaN	NaN	NaN			2.6	NaN	NaN	NaN
														1.7	0.996	0.996	0.996			1.7	0.996	0.996	0.996			2.7	1	1	1			2.7	0.997	0.997	0.997
														1.8	0.996	0.996	0.996			1.8	0.996	0.996	0.996			2.8	NaN	NaN	NaN			2.8	NaN	NaN	NaN
														1.9	0.996	0.996	0.996			1.9	0.996	0.996	0.996			2.9	NaN	NaN	NaN			2.9	NaN	NaN	NaN
														2	0.993	0.993	0.993			2	0.993	0.993	0.993			3	0.998	1	1			3	0.993	0.993	0.993
													LS4	0.1	0.001	0.00304	0.00429		LS4	0.1	0.001	0.00304	0.00429		LS3	0.1	0.002	0.0033	0.0045		LS3	0.1	0.00219	0.00404	0.00652
														0.2	0.00175	0.00348	0.00754			0.2	0.00175	0.00348	0.00754			0.2	0.00202	0.00575	0.0206			0.2	0.00219	0.00311	0.00466
														0.3	0.00265	0.005	0.00672			0.3	0.00265	0.005	0.00672			0.3	0.00482	0.0074	0.0428			0.3	0.00468	0.00745	0.00805
														0.4	0.00589	0.01	0.011			0.4	0.00589	0.01	0.011			0.4	0.00404	0.0119	0.179			0.4	0.00437	0.00622	0.00838
														0.5	0.0069	0.01	0.0176			0.5	0.0069	0.01	0.0176			0.5	0.0137	0.0714	0.317			0.5	0.00654	0.082	0.192
														0.6	0.00547	0.0168	0.02			0.6	0.00547	0.0168	0.02			0.6	0.0451	0.182	0.467			0.6	0.00973	0.062	0.162
														0.7	0.0164	0.03	0.0457			0.7	0.0164	0.03	0.0457			0.7	0.432	0.514	0.629			0.7	0.166	0.338	0.563
														0.8	0.0145	0.035	0.0603			0.8	0.0145	0.035	0.0603			0.8	0.577	0.702	0.836			0.8	0.409	0.665	0.822
														0.9	0.00759	0.0326	0.07			0.9	0.00759	0.0326	0.07			0.9	0.628	0.8	0.949			0.9	0.386	0.853	0.933
														1	0.0289	0.05	0.0825			1	0.0289	0.05	0.0825			1	0.782	0.952	0.99			1	0.696	0.743	0.97
														1.1	0.0364	0.0771	0.14			1.1	0.0364	0.0771	0.14			1.1	0.845	0.989	0.993			1.1	0.945	0.991	0.995
														1.2	0.0812	0.232	0.246			1.2	0.0812	0.232	0.246			1.2	0.852	0.99	0.994			1.2	0.906	0.998	0.998
														1.3	0.421	0.421	0.421			1.3	0.421	0.421	0.421			1.3	0.902	0.992	0.995			1.3	0.993	0.997	0.998
														1.4	0.625	0.625	0.625			1.4	0.625	0.625	0.625			1.4	0.922	0.994	0.996			1.4	0.993	0.995	0.998
														1.5	0.777	0.78	0.782			1.5	0.777	0.78	0.782			1.5	0.945	0.993	0.996			1.5	0.909	0.977	0.997
														1.6	0.881	0.881	0.881			1.6	0.881	0.881	0.881			1.6	0.948	0.992	0.996			1.6	0.994	0.997	0.998
														1.7	0.947	0.947	0.947			1.7	0.947	0.947	0.947			1.7	0.959	0.993	0.996			1.7	0.995	0.996	0.997
														1.8	0.979	0.979	0.979			1.8	0.979	0.979	0.979			1.8	0.973	0.993	0.997			1.8	0.993	0.996	0.998
														1.9	0.989	0.989	0.989			1.9	0.989	0.989	0.989			1.9	0.972	0.994	0.998			1.9	0.995	0.997	0.998
														2	0.996	0.996	0.996			2	0.996	0.996	0.996			2	0.974	0.996	0.998			2	0.967	0.995	0.997
																										2.1	0.997	0.997	0.997			2.1	0.993	0.993	0.993
																										2.2	NaN	NaN	NaN			2.2	NaN	NaN	NaN
																										2.3	NaN	NaN	NaN			2.3	NaN	NaN	NaN
																										2.4	0.994	0.997	0.999			2.4	0.997	0.997	0.997
																										2.5	NaN	NaN	NaN			2.5	0.977	0.987	0.995
																										2.6	NaN	NaN	NaN			2.6	NaN	NaN	NaN
																										2.7	0.997	0.997	0.999			2.7	0.997	0.997	0.997
																										2.8	NaN	NaN	NaN			2.8	NaN	NaN	NaN
																										2.9	NaN	NaN	NaN			2.9	NaN	NaN	NaN
																										3	0.995	1	1			3	1	1	1
																									LS4	0.1	0.00201	0.00283	0.00368		LS4	0.1	0.00219	0.00311	0.00559
																										0.2	0.00314	0.00383	0.00627			0.2	0.00437	0.00529	0.00559
																										0.3	0.00468	0.00632	0.00862			0.3	0.00468	0.00559	0.00945
																										0.4	0.00409	0.00617	0.0173			0.4	0.00311	0.00374	0.0056
																										0.5	0.00339	0.00552	0.0404			0.5	0.00504	0.00931	0.0192
																										0.6	0.00372	0.00802	0.0379			0.6	0.00421	0.00745	0.00945
																										0.7	0.00381	0.00766	0.101			0.7	0.00529	0.00561	0.00841
																										0.8	0.00525	0.0123	0.138			0.8	0.00437	0.00808	0.0112
																										0.9	0.00482	0.0131	0.152			0.9	0.00548	0.00987	0.0135
																										1	0.0112	0.205	0.274			1	0.00964	0.104	0.18
																										1.1	0.0515	0.183	0.338			1.1	0.0103	0.0281	0.116
																										1.2	0.0218	0.232	0.367			1.2	0.0156	0.047	0.193
																										1.3	0.29	0.411	0.455			1.3	0.0956	0.215	0.43
																										1.4	0.41	0.475	0.633			1.4	0.196	0.371	0.61
																										1.5	0.204	0.497	0.729			1.5	0.357	0.408	0.495
																										1.6	0.532	0.679	0.883			1.6	0.494	0.693	0.848
																										1.7	0.565	0.802	0.942			1.7	0.638	0.81	0.92
																										1.8	0.502	0.625	0.964			1.8	0.536	0.848	0.95
																										1.9	0.627	0.936	0.988			1.9	0.856	0.943	0.98
																										2	0.652	0.959	0.996			2	0.608	0.758	0.969
																										2.1	0.345	0.576	0.784			2.1	0.411	0.411	0.411
																										2.2	NaN	NaN	NaN			2.2	NaN	NaN	NaN
																										2.3	NaN	NaN	NaN			2.3	NaN	NaN	NaN
																										2.4	0.657	0.852	0.938			2.4	0.737	0.737	0.737
																										2.5	NaN	NaN	NaN			2.5	0.718	0.73	0.763
																										2.6	NaN	NaN	NaN			2.6	NaN	NaN	NaN
																										2.7	0.88	0.961	0.983			2.7	0.918	0.918	0.918
																										2.8	NaN	NaN	NaN			2.8	NaN	NaN	NaN
																										2.9	NaN	NaN	NaN			2.9	NaN	NaN	NaN
																										3	0.962	0.993	0.998			3	0.977	0.977	0.977

## Sheet: Sheet7
collapse	serious damage	medium damage	slight damage	no damage	Intensity		6-6.6		6.6-7.2		7.1-7.7		7.7-8.3		8.3-8.8		8.8-9.4		9.4-10
0.004	0.107	0.367	0.374	0.148	6		0.374	0.292528	0.236	0.282435	0.5905	0.5905	0.057	0.138876	0.3839	0.3839	0.037	0.0630286	0.007	0.0433727
0.033	0.06	0.105	0.194	0.608	6		0.194	18	0.34	17		1	0.07	17		1	0.085	14	0.015	11
0	0.03	0.15	0.32	0.5	6		0.32		0.185				0.12				0		0
0.025	0.165	0.225	0.265	0.325	6		0.265		0.2522				0.1101				0.025		0
0.0225	0.0093	0.1001	0.2433	0.6915	6		0.2433		0.3495				0.3211				0		0
0.0095	0.0117	0.0939	0.2679	0.661	6		0.2679		0.3497				0.296				0.03		0
0.118	0.144	0.188	0.218	0.332	6		0.218		0.101				0.085				0.09		0
0	0.03	0.13	0.28	0.56	6		0.28		0.31				0.08				0.02		0
0	0.07	0.16	0.27	0.5	6		0.27		0.3				0.05				0.03		0
0	0.05	0.16	0.3	0.49	6		0.3		0.33				0.06				0.03		0.4401
0	0.01	0.08	0.25	0.66	6		0.25		0.37				0.26				0.01		0.015
0	0.02	0.15	0.28	0.55	6		0.28		0.33				0.1				0.146
0	0.02	0.12	0.29	0.57	6		0.29		0.31				0.1				0.2944
0	0.02	0.12	0.29	0.57	6		0.29		0.31				0.1				0.085
0.02	0.16	0.23	0.27	0.33	6		0.27		0.19				0.12
0.0001	0.0065	0.0695	0.2584	0.6656	6		0.2584		0.353				0.3117
0.025	0.165	0.225	0.265	0.325	6		0.265		0.185				0.12
0	0	0	0.6299	0.3701	6.5		0.6299
0.14	0.213	0.255	0.236	0.156	7			18	17	1	17	1	14	11		79
0.075	0.134	0.256	0.34	0.195	7			0.227848	0.21519	0.0126582	0.21519	0.0126582	0.177215	0.139241
0.19	0.26	0.2	0.185	0.165	7		0.5	4.667	1.175	0.251768	按照density进行直接拟合，低烈度值占优势，因为其数据量比高密度值多
0.0338	0.1294	0.1739	0.2522	0.4104	7		0.805		1.64	0.351403	应该分权重拟合
0.0392	0.0642	0.2213	0.3495	0.4056	7		0.922		1.852	0.396829
0.006	0.0611	0.2102	0.3497	0.3757	7		0.675
0.505	0.176	0.166	0.101	0.052	7		0.835
0.05	0.18	0.26	0.31	0.2	7		0.93
0.08	0.22	0.23	0.3	0.17	7
0.07	0.21	0.28	0.33	0.11	7
0	0.04	0.26	0.37	0.33	7
0.04	0.2	0.25	0.33	0.18	7
0.04	0.17	0.25	0.31	0.23	7
0.04	0.17	0.25	0.31	0.23	7
0.18	0.2	0.26	0.19	0.17	7
0.003	0.0597	0.1971	0.353	0.3871	7
0.19	0.26	0.2	0.185	0.165	7
0	0	0.1538	0.5905	0.2557	7.5
0.355	0.397	0.164	0.057	0.027	8
0.282	0.28	0.29	0.07	0.078	8
0.375	0.27	0.165	0.12	0.07	8
0.4274	0.272	0.1748	0.1101	0.0155	8
0.1446	0.1901	0.3731	0.3211	0.0563	8
0.017	0.2143	0.3993	0.296	0.0763	8
0.681	0.103	0.093	0.085	0.038	8
0.22	0.33	0.32	0.08	0.05	8
0.26	0.37	0.31	0.05	0.01	8
0.31	0.35	0.26	0.06	0.02	8
0.08	0.23	0.34	0.26	0.09	8
0.2	0.34	0.32	0.1	0.04	8
0.19	0.3	0.33	0.1	0.08	8
0.19	0.3	0.33	0.1	0.08	8
0.37	0.27	0.17	0.12	0.07	8
0.0417	0.1992	0.3784	0.3117	0.0702	8
0.375	0.27	0.165	0.12	0.07	8
0	0.0701	0.31031	0.3839	0.2357	8.5
0.602	0.17	0.165	0.037	0.026	9
0.5	0.25	0.14	0.085	0.025	9
1	0	0	0	0	9
0.52	0.28	0.17	0.025	0.005	9
0.62	0.31	0.07	0	0	9
0.55	0.3	0.12	0.03	0	9
0.21	0.52	0.18	0.09	0	9
0.51	0.28	0.19	0.02	0	9
0.5	0.27	0.19	0.03	0.01	9
0.5	0.27	0.19	0.03	0.01	9
0.74	0.18	0.07	0.01	0	9
0.15	0.4415	0.263	0.146	0	9
0	0.1276	0.3754	0.2944	0.2027	9
0.5	0.25	0.14	0.085	0.025	9
0.878	0.095	0.02	0.007	0	10
0.73	0.17	0.075	0.015	0	10
0.9	0.09	0.01	0	0	10
0.94	0.06	0	0	0	10
0.93	0.07	0	0	0	10
0.65	0.26	0.09	0	0	10
0.89	0.105	0.005	0	0	10
0.87	0.1	0.03	0	0	10
0.87	0.1	0.03	0	0	10
0	0.2094	0.3505	0.4401	0	10
0.735	0.175	0.075	0.015	0	10
