# Supplementary material for: Review article: Review of fragility analyses for major building types in China with new implications for intensity–PGA relation development
Source: Copernicus journal article supplement (doi:10.5194/nhess-20-643-2020), 2020-02-27
Supplement: Supplementary file 3 [file nhess-20-643-2020-supplement.zip › supplements_20190528/data_Fig3-4/masonry_A_Intensity_fragility.txt]

Intensity	LS1	LS2	LS3	LS4
6	0.8	0.8	0.2	0
6	0.3921	0.0998	0.0237	0.0027
6	0.3921	0.0998	0.0237	0.0027
6	0.3303	0.0695	0.0153	0.0017
6	0.2385	0.0762	0.0244	0.0054
6	0.15	0.01	0	0
6	0.15	0.01	0	0
6	0.43	0.15	0	0
6	0.15	0	0	0
6	0.248	0.04	0.015	0
6	0.295	0.061	0.017	0
6	0.303	0.05	0.02	0
6	0.35	0.076	0.022	0
6	0.348	0.0724	0.0147	0.0014
6	0.3679	0.0828	0.0176	0.001
6	0.3921	0.0998	0.0237	0.0027
6	0.2907	0.0506	0.0097	0.0009
6	0.3071	0.058	0.0118	0.0012
6	0.3303	0.0695	0.0153	0.0017
6	0.331	0.057	0	0
6	0.022	0.022	0	0
6	0.243	0.019	0	0
6	0.212	0.019	0	0
6	0.113	0	0	0
6	0.003	0	0	0
6	0.004	0.003	0	0
6	0.2907	0.0506	0.0097	0.0009
6	0.3071	0.058	0.0118	0.0012
6	0.3303	0.0695	0.0153	0.0017
7	0.5653	0.2128	0.0502	0.0046
7	0.4736	0.2025	0.0724	0.0155
7	0.4736	0.2025	0.0724	0.0155
7	0.3663	0.1353	0.0456	0.0096
7	0.521	0.2283	0.0876	0.0123
7	0.5	0.14	0.01	0
7	0.5	0.14	0.01	0
7	0.8	0	0	0
7	0.43	0	0	0
7	0.567	0.332	0.154	0.015
7	0.734	0.545	0.25	0.081
7	0.602	0.417	0.204	0.02
7	0.779	0.65	0.295	0.106
7	0.3945	0.1419	0.0442	0.0082
7	0.4303	0.1683	0.0561	0.0112
7	0.4736	0.2025	0.0724	0.0155
7	0.3008	0.0948	0.0286	0.0054
7	0.3276	0.1105	0.0349	0.0069
7	0.3663	0.1353	0.0456	0.0096
7	0.859	0.244	0.047	0
7	0.345	0.022	0.022	0
7	0.832	0.153	0.014	0
7	0.79	0.134	0.012	0
7	0.744	0.039	0	0
7	0.02	0.003	0	0
7	0.137	0.003	0	0
7	0.3008	0.0948	0.0286	0.0054
7	0.3276	0.1105	0.0349	0.0069
7	0.3663	0.1353	0.0456	0.0096
8	0.7787	0.5208	0.2421	0.0139
8	0.6584	0.3964	0.1775	0.0501
8	0.6584	0.3964	0.1775	0.0501
8	0.5175	0.2762	0.1135	0.031
8	0.8037	0.5028	0.1828	0.0406
8	0.78	0.41	0.11	0.02
8	0.78	0.41	0.11	0.02
8	0.95	0	0	0.15
8	0.8	0	0	0
8	0.837	0.676	0.363	0.048
8	0.925	0.817	0.513	0.174
8	0.892	0.776	0.413	0.063
8	0.965	0.912	0.563	0.184
8	0.5651	0.3006	0.1166	0.0291
8	0.6083	0.3435	0.1429	0.0379
8	0.6584	0.3964	0.1775	0.0501
8	0.4311	0.2055	0.0751	0.0186
8	0.4672	0.2339	0.0899	0.0232
8	0.5175	0.2762	0.1135	0.031
8	0.961	0.852	0.237	0.039
8	0.864	0.345	0.022	0.022
8	0.972	0.814	0.131	0.013
8	0.954	0.778	0.111	0.012
8	0.957	0.715	0.026	0
8	0.499	0.037	0.005	0
8	0.835	0.186	0.007	0
8	0.4311	0.2055	0.0751	0.0186
8	0.4672	0.2339	0.0899	0.0232
8	0.5175	0.2762	0.1135	0.031
9	0.902	0.7394	0.4397	0.0868
9	0.8488	0.638	0.3713	0.1391
9	0.8488	0.638	0.3713	0.1391
9	0.7133	0.4837	0.2498	0.089
9	0.92	0.79	0.55	0.13
9	0.92	0.79	0.55	0.13
9	1	0	0	0.28
9	0.95	0	0	0.15
9	0.909	0.806	0.608	0.156
9	0.982	0.927	0.777	0.432
9	0.949	0.881	0.693	0.191
9	0.992	0.972	0.852	0.452
9	0.7755	0.5342	0.2709	0.0915
9	0.8107	0.5823	0.3157	0.1121
9	0.8488	0.638	0.3713	0.1391
9	0.6253	0.3904	0.179	0.0588
9	0.6635	0.4293	0.2071	0.0704
9	0.7133	0.4837	0.2498	0.089
9	1	0.963	0.85	0.212
9	1	0.864	0.345	0.022
9	1	0.975	0.79	0.128
9	1	0.955	0.747	0.108
9	0.993	0.954	0.756	0.026
9	0.991	0.484	0.063	0.005
9	0.997	0.814	0.234	0.001
9	0.6253	0.3906	0.179	0.0588
9	0.6635	0.4293	0.2071	0.0704
9	0.7133	0.4837	0.2498	0.089
10	0.6782	0.4253	0.1724	0.0345
10	0.9757	0.7059	0.5021	0.363
10	0.9757	0.8983	0.6945	0.363
10	0.9158	0.7754	0.5311	0.2506
10	0.99	0.96	0.85	0.35
10	0.99	0.96	0.85	0.35
10	1	0	0	0.37
10	1	0.28	0.28	0.28
10	0.983	0.947	0.887	0.545
10	0.989	0.963	0.876	0.677
10	0.988	0.962	0.942	0.605
10	0.994	0.983	0.911	0.727
10	0.9543	0.8383	0.5895	0.2731
10	0.965	0.8673	0.6384	0.3133
10	0.9757	0.8983	0.6945	0.363
10	0.8687	0.6925	0.4323	0.1846
10	0.8904	0.729	0.4737	0.211
10	0.9158	0.7754	0.5311	0.2506
10	1	1	0.964	0.772
10	1	1	0.864	0.022
10	1	0.999	0.957	0.692
10	1	1	0.924	0.653
10	1	1	0.973	0.681
10	1	0.99	0.81	0.118
10	1	0.997	0.915	0.302
10	0.8687	0.6925	0.4323	0.1846
10	0.8904	0.729	0.4737	0.211
10	0.9158	0.7754	0.5311	0.2506
