# Supplementary material for: Review article: Review of fragility analyses for major building types in China with new implications for intensity–PGA relation development
Source: Copernicus journal article supplement (doi:10.5194/nhess-20-643-2020), 2020-02-27
Supplement: Supplementary file 3 [file nhess-20-643-2020-supplement.zip › supplements_20190528/data_Fig3-4/masonry_B_Intensity_fragility.txt]

Intensity	LS1	LS2	LS3	LS4
6	0.2552	0.0455	0.0099	0.0012
6	0.2068	0.0497	0.0105	0.0014
6	0.13	0.005	0	0
6	0.13	0.005	0	0
6	0	0	0	0
6	0	0	0	0
6	0.083	0.01	0	0
6	0.13	0.016	0.002	0
6	0.138	0.02	0.005	0
6	0.185	0.031	0.007	0
6	0.193	0.03	0.01	0
6	0.24	0.046	0.012	0
6	0.219	0.0329	0.0064	0.0007
6	0.2327	0.0373	0.0075	0.0008
6	0.2552	0.0455	0.0099	0.0012
6	0.1413	0.0139	0.002	0.0002
6	0.1515	0.0157	0.0023	0.0002
6	0.1651	0.0185	0.0029	0.0002
6	0	0	0	0
6	0	0	0	0
6	0.2327	0.0373	0.0075	0.0008
7	0.2566	0.0849	0.0287	0.0064
7	0.4543	0.1966	0.0416	0.0184
7	0.32	0.095	0.005	0
7	0.32	0.095	0.005	0
7	0.15	0	0	0
7	0	0	0	0
7	0.462	0.077	0.004	0
7	0.599	0.23	0.115	0.006
7	0.497	0.162	0.054	0.005
7	0.644	0.335	0.16	0.031
7	0.532	0.247	0.104	0.01
7	0.689	0.44	0.205	0.056
7	0.2058	0.0591	0.0182	0.0037
7	0.2246	0.0682	0.0218	0.0046
7	0.2566	0.0849	0.0287	0.0064
7	0.1111	0.022	0.0054	0.0009
7	0.1219	0.0254	0.0064	0.0011
7	0.1375	0.0307	0.008	0.0014
7	0.061	0	0	0
7	0.35	0	0	0
7	0.2246	0.0682	0.0218	0.0046
8	0.3601	0.1746	0.0697	0.0196
8	0.81	0.473	0.109	0.022
8	0.7	0.32	0.07	0.01
8	0.7	0.32	0.07	0.01
8	0.43	0	0	0
8	0.15	0	0	0
8	0.672	0.376	0.213	0.003
8	0.805	0.532	0.363	0.144
8	0.727	0.476	0.263	0.018
8	0.845	0.627	0.412	0.154
8	0.782	0.576	0.313	0.033
8	0.885	0.722	0.463	0.164
8	0.2904	0.1275	0.0463	0.0121
8	0.3165	0.1444	0.0544	0.0146
8	0.3601	0.1746	0.0697	0.0196
8	0.1548	0.0524	0.015	0.0033
8	0.1706	0.0597	0.0176	0.0039
8	0.1932	0.0711	0.0219	0.005
8	0.66	0	0	0
8	0.765	0.184	0	0
8	0.3165	0.1444	0.0544	0.0146
9	0.5204	0.3217	0.1538	0.0546
9	0.88	0.66	0.38	0.05
9	0.88	0.66	0.38	0.05
9	0.8	0	0	0
9	0.43	0	0	0
9	0.789	0.581	0.353	0.051
9	0.952	0.792	0.552	0.372
9	0.829	0.656	0.438	0.086
9	0.962	0.837	0.627	0.392
9	0.869	0.731	0.523	0.121
9	0.972	0.882	0.702	0.412
9	0.4357	0.251	0.1088	0.0362
9	0.4682	0.2772	0.1248	0.0426
9	0.5204	0.3217	0.1538	0.0546
9	0.2506	0.1205	0.0406	0.0116
9	0.274	0.1349	0.0469	0.0137
9	0.3063	0.1561	0.057	0.0171
9	0.933	0.418	0	0
9	1	0.745	0.184	0
9	0.4682	0.2772	0.1248	0.0426
10	0.7641	0.5783	0.3534	0.1568
10	0.98	0.94	0.82	0.27
10	0.98	0.94	0.82	0.27
10	0.95	0.28	0.28	0.15
10	0.8	0	0	0
10	0.968	0.902	0.722	0.365
10	0.974	0.903	0.771	0.527
10	0.973	0.917	0.777	0.425
10	0.979	0.923	0.806	0.577
10	0.978	0.932	0.832	0.485
10	0.984	0.943	0.841	0.627
10	0.3903	0.4909	0.2767	0.1133
10	0.72	0.5248	0.3053	0.1289
10	0.7641	0.5783	0.3534	0.1568
10	0.4851	0.291	0.133	0.0449
10	0.516	0.317	0.1489	0.0514
10	0.555	0.3526	0.1725	0.0618
10	1	0.933	0.433	0
10	1	1	0.533	0.107
10	0.72	0.5248	0.3053	0.1289
