# Supplementary material for: Review article: Review of fragility analyses for major building types in China with new implications for intensity–PGA relation development
Source: Copernicus journal article supplement (doi:10.5194/nhess-20-643-2020), 2020-02-27
Supplement: Supplementary file 3 [file nhess-20-643-2020-supplement.zip › supplements_20190528/data_Fig3-4/Masonry_B_PGA(g)_fragility.txt]

int_type	LS1	LS2	LS3	LS4
0.1	0.12	0.03	0.01	0.001
0.1	0.1	0.02	0.01	0.001
0.1	0.07	0.02	0.01	0.001
0.1	0.0086455	0.0057637	0.0086455	0.0057637
0.1	0.0056818	0.0085227	0.0085227	0.0085227
0.1	0.011331	0.011331	0.0084986	0.011331
0.2	0.36	0.13	0.03	0.01
0.2	0.31	0.09	0.02	0.01
0.2	0.24	0.07	0.02	0.01
0.2	0.18444	0.0317	0.0086455	0.0057637
0.2	0.053977	0.011364	0.0085227	0.0085227
0.2	0.014164	0.016997	0.0084986	0.011331
0.3	0.55	0.25	0.07	0.02
0.3	0.49	0.2	0.05	0.01
0.3	0.42	0.15	0.04	0.01
0.3	0.43516	0.13545	0.037464	0.0057637
0.3	0.19034	0.03125	0.0085227	0.0056818
0.3	0.093484	0.016997	0.0084986	0.011331
0.4	0.68	0.36	0.13	0.03
0.4	0.63	0.31	0.1	0.02
0.4	0.55	0.24	0.07	0.01
0.4	0.62536	0.26801	0.095101	0.011527
0.4	0.34659	0.085227	0.019886	0.0085227
0.4	0.1898	0.033994	0.016997	0.014164
0.5	0.77	0.47	0.19	0.05
0.5	0.72	0.41	0.14	0.04
0.5	0.66	0.33	0.11	0.02
0.5	0.76945	0.41787	0.19308	0.040346
0.5	0.5	0.17614	0.053977	0.014205
0.5	0.31161	0.067989	0.022663	0.016997
0.6	0.83	0.56	0.25	0.08
0.6	0.79	0.49	0.21	0.05
0.6	0.73	0.41	0.15	0.04
0.6	0.85591	0.54467	0.28242	0.07781
0.6	0.63352	0.26705	0.099432	0.017045
0.6	0.43343	0.13598	0.03966	0.014164
0.7	0.87	0.63	0.31	0.1
0.7	0.84	0.57	0.25	0.08
0.7	0.78	0.49	0.19	0.05
0.7	0.90778	0.6513	0.38329	0.12104
0.7	0.73295	0.37216	0.15057	0.028409
0.7	0.53824	0.2068	0.076487	0.016997
0.8	0.91	0.69	0.37	0.13
0.8	0.88	0.63	0.31	0.1
0.8	0.83	0.55	0.24	0.07
0.8	0.94524	0.73775	0.47839	0.18444
0.8	0.80966	0.46307	0.22159	0.056818
0.8	0.63739	0.27762	0.09915	0.022663
0.9	0.93	0.74	0.42	0.16
0.9	0.91	0.68	0.36	0.12
0.9	0.87	0.61	0.29	0.09
0.9	0.9683	0.79539	0.56196	0.24496
0.9	0.8608	0.55398	0.28977	0.085227
0.9	0.70822	0.34844	0.13881	0.031161
1	0.95	0.78	0.47	0.19
1	0.92	0.73	0.42	0.15
1	0.89	0.66	0.33	0.1
1	0.97983	0.84726	0.63689	0.31124
1	0.90057	0.61932	0.35511	0.11364
1	0.76771	0.42493	0.19263	0.042493
1.1	0.98847	0.89625	0.69452	0.37464
1.1	0.93182	0.7017	0.42045	0.15057
1.1	0.82153	0.50425	0.24646	0.065156
1.2	0.99712	0.93084	0.75504	0.44669
1.2	0.94886	0.74716	0.47727	0.19318
1.2	0.85269	0.55524	0.28329	0.084986
