# Supplementary material for: Review article: Review of fragility analyses for major building types in China with new implications for intensity–PGA relation development
Source: Copernicus journal article supplement (doi:10.5194/nhess-20-643-2020), 2020-02-27
Supplement: Supplementary file 3 [file nhess-20-643-2020-supplement.zip › supplements_20190528/data_Fig3-4/RC_A_Intensity_fragility.txt]

Intensity	LS1	LS2	LS3	LS4
6	0.1681	0.0098	0.0009	0
6	0.1683	0.0102	0.001	0
6	0.23	0.033	0.009	0
6	0	0	0	0
6	0.03	0	0	0
6	0.18	0	0	0
6	0.13	0	0	0
6	0.12	0	0	0
6	0.15	0	0	0
6	0.12	0	0	0
6	0.1683	0.0102	0.001	0
6	0.1338	0.0136	0	0
6	0.60317	0.20635	0.031746	0
6	0.055	0	0	0
6	0.065	0.005	0	0
6	0	0	0	0
6	0.065	0.005	0	0
6	0.12	0	0	0
6	0.1996	0.0132	0	0
6	0.15	0	0	0
6	0.12	0	0	0
6	0.002	0.001	0	0
6	0	0	0	0
6	0.12	0	0	0
7	0.4204	0.1018	0.0169	0
7	0.4225	0.1188	0.0213	0
7	0.524	0.232	0.038	0
7	0	0	0	0
7	0.07	0.01	0	0
7	0.85	0.14	0	0
7	0.25	0.02	0	0
7	0.077	0.0243	0.003	0
7	0.4	0.05	0	0
7	0.25	0.02	0	0
7	0.4225	0.1188	0.0213	0
7	0.2065	0.0061	0	0
7	0.3994	0.1395	0.0411	0
7	0.112	0	0	0
7	0.19	0.04	0	0
7	0.05	0	0	0
7	0.19	0.04	0	0
7	0.25	0.02	0	0
7	0.393	0.0923	0.0158	0
7	0.4	0.05	0	0
7	0.25	0.02	0	0
7	0.166	0.002	0	0
7	0.156	0	0	0
7	0.25	0.02	0	0
8	0.7547	0.4379	0.1863	0
8	0.6004	0.2596	0.1058	0.0169
8	0.6153	0.2594	0.1048	0.0146
8	0.816	0.556	0.204	0.022
8	0.2358	0.0332	0	0
8	0.53	0.1	0.01	0
8	0.48	0.09	0.03	0
8	0.87	0.6	0.35	0.09
8	0.45	0.12	0.017	0.002
8	0.1768	0.0804	0.0205	0.003
8	0.6	0.24	0.03	0.005
8	0.45	0.12	0.017	0.002
8	0.6153	0.2594	0.1048	0.0146
8	0.5874	0.2557	0.1247	0.0419
8	0.75	0.4375	0.25	0.0625
8	0.316	0	0	0
8	0.56	0.1	0.02	0
8	0.49	0.05	0	0
8	0.56	0.1	0.02	0
8	0.45	0.12	0.02	0
8	0.8879	0.1161	0.0188	0
8	0.6	0.24	0.03	0.005
8	0.45	0.12	0.017	0.002
8	0.786	0.148	0.004	0
8	0.873	0.141	0	0
8	0.45	0.12	0.017	0.002
9	0.7688	0.4887	0.2971	0.1926
9	0.9912	0.753	0.2252	0.023
9	0.838	0.719	0.6	0.107
9	0.991	0.7406	0.267	0.054
9	0.97	0.55	0.16	0.02
9	0.65	0.345	0.09	0.015
9	0.6863	0.4785	0.2315	0.038
9	0.8	0.43	0.15	0.025
9	0.65	0.345	0.09	0.015
9	0.9912	0.753	0.2252	0.023
9	0.85	0.58	0.3	0.07
9	0.88	0.41	0.04	0
9	0.85	0.49	0.24	0.04
9	0.65	0.35	0.09	0.02
9	0.79	0.45	0.12	0
9	0.8	0.43	0.15	0.025
9	0.65	0.345	0.09	0.015
9	0.996	0.753	0.176	0.002
9	1	0.748	0.213	0
9	0.65	0.345	0.09	0.015
10	1	0.9143	0.7714	0.5778
10	0.974	0.946	0.879	0.421
10	1	0.97	0.78	0.23
10	0.85	0.645	0.24	0.075
10	0.7177	0.5076	0.279	0.1306
10	0.9	0.745	0.35	0.095
10	0.85	0.645	0.24	0.075
10	1	0.9143	0.7714	0.5778
10	0.99	0.94	0.8	0.25
10	0.98	0.76	0.33	0.08
10	0.99	0.94	0.8	0.25
10	0.9	0.745	0.35	0.095
10	0.85	0.645	0.24	0.075
10	1	0.995	0.745	0.195
10	1	0.998	0.743	0.222
10	0.85	0.645	0.24	0.075
