# Supplementary material for: Review article: Review of fragility analyses for major building types in China with new implications for intensity–PGA relation development
Source: Copernicus journal article supplement (doi:10.5194/nhess-20-643-2020), 2020-02-27
Supplement: Supplementary file 3 [file nhess-20-643-2020-supplement.zip › supplements_20190528/data_Fig3-4/RC_A_PGA(g)_fragility.txt]

int_type	LS1	LS2	LS3	LS4
0.1	0.47	0.25	0	0
0.1	0.18	0.08	0	0
0.1	0.0321	0	0	0
0.1	0	0	0	0
0.1	0.0084	0	0	0
0.1	0.0275	0	0	0
0.1	0.0866	0	0	0
0.1	0.0458	0	0	0
0.1	0.0139	0	0	0
0.1	0.24	0.06	0.014	0.001
0.1	0.15	0.03	0.006	0.001
0.1	0.1	0.03	0.01	0.001
0.1	0.07	0.02	0.01	0.001
0.1	0.077882	0.0093458	0.0062305	0.0031153
0.1	0.052632	0	0	0
0.1	0.15885	0.0052083	0.0026042	0.0052083
0.1	0.0026042	0.0026042	0.0026042	0.0026042
0.1	0.48084	0	0	0
0.1	0.081731	0.019231	0.0096154	0.0096154
0.1	0.040323	0.012097	0.0080645	0.0080645
0.2	0.83	0.65	0.16	0
0.2	0.58	0.38	0.06	0
0.2	0.219	0.0345	0.006	0
0.2	0.037	0	0	0
0.2	0.0882	0.0126	0	0
0.2	0.3022	0.0385	0	0
0.2	0.4372	0.0823	0.0216	0
0.2	0.2188	0.0292	0.0083	0
0.2	0.2194	0.0417	0.0028	0
0.2	0.55	0.24	0.066	0.014
0.2	0.41	0.15	0.035	0.009
0.2	0.32	0.1	0.03	0.01
0.2	0.26	0.07	0.02	0.01
0.2	0.65109	0.28037	0.056075	0.0093458
0.2	0.99649	0.33333	0	0.0035088
0.2	0.99479	0.69792	0.0078125	0.0052083
0.2	0.96615	0.09375	0.0026042	0.0026042
0.2	0.96516	0.18118	0.0034843	0.0034843
0.2	0.5	0.28365	0.067308	0.019231
0.2	0.39516	0.19758	0.028226	0.0080645
0.3	0.94	0.83	0.44	0.054
0.3	0.79	0.66	0.18	0.02
0.3	0.3488	0.0679	0.0571	0.0036
0.3	0.164	0.0053	0.0053	0
0.3	0.2437	0.0252	0.0126	0
0.3	0.478	0.0604	0.0604	0
0.3	0.5065	0.1688	0.1429	0.013
0.3	0.3167	0.0708	0.0521	0.0063
0.3	0.3917	0.0639	0.0639	0
0.3	0.73	0.41	0.152	0.035
0.3	0.6	0.29	0.089	0.022
0.3	0.51	0.21	0.05	0.02
0.3	0.43	0.16	0.04	0.01
0.3	0.91589	0.66667	0.27726	0.080997
0.3	0.99298	0.98246	0	0.0035088
0.3	0.99479	0.99219	0.0052083	0.0052083
0.3	0.99479	0.91406	0.0052083	0.0026042
0.3	0.99642	0.61538	0.0053667	0.0035778
0.3	0.99642	0.99642	0.021467	0.0053667
0.3	0.99652	0.5784	0.0034843	0.0034843
0.3	0.78365	0.59135	0.24038	0.019231
0.3	0.70968	0.49194	0.15726	0.0080645
0.4	0.97	0.91	0.65	0.153
0.4	0.88	0.79	0.31	0.05
0.4	0.4143	0.125	0.1036	0.0155
0.4	0.3122	0.0265	0.0106	0
0.4	0.4286	0.0588	0.0294	0.0042
0.4	0.5165	0.1813	0.0824	0.022
0.4	0.4026	0.2294	0.2727	0.0346
0.4	0.3792	0.125	0.1021	0.0167
0.4	0.4611	0.125	0.1056	0.0139
0.4	0.83	0.55	0.25	0.07
0.4	0.73	0.41	0.15	0.04
0.4	0.64	0.32	0.1	0.02
0.4	0.56	0.26	0.07	0.02
0.4	0.97819	0.87227	0.54829	0.25234
0.4	0.99649	0.99649	0.014035	0
0.4	0.99219	0.9974	0.14844	0.0078125
0.4	0.9974	0.99219	0.0052083	0.0052083
0.4	0.99652	0.85017	0.031359	0.0034843
0.4	0.91346	0.79327	0.44231	0.019231
0.4	0.87097	0.70968	0.34274	0.0080645
0.5	0.99	0.95	0.8	0.333
0.5	0.92	0.86	0.48	0.1
0.5	0.89	0.65	0.34	0.11
0.5	0.81	0.52	0.22	0.06
0.5	0.73	0.42	0.15	0.04
0.5	0.67	0.36	0.12	0.03
0.5	0.99065	0.95016	0.75078	0.45171
0.5	0.99649	0.99298	0.29474	0
0.5	0.99219	0.99479	0.66927	0.0052083
0.5	0.99479	0.99219	0.091146	0.0026042
0.5	0.99652	0.95122	0.1115	0.0069686
0.5	0.96154	0.89423	0.62019	0.024038
0.5	0.93952	0.84274	0.53226	0.012097
0.6	0.99	0.96	0.86	0.414
0.6	0.94	0.92	0.6	0.18
0.6	0.4417	0.1702	0.2048	0.0905
0.6	0.6243	0.0847	0.0741	0.0053
0.6	0.5966	0.1639	0.0882	0.021
0.6	0.3791	0.1978	0.3187	0.0714
0.6	0.1818	0.2251	0.342	0.2468
0.6	0.4625	0.15	0.1917	0.0958
0.6	0.4139	0.1972	0.2222	0.0833
0.6	0.92	0.73	0.42	0.15
0.6	0.86	0.61	0.29	0.09
0.6	0.8	0.51	0.21	0.06
0.6	0.74	0.44	0.17	0.04
0.6	0.99377	0.97819	0.87227	0.62617
0.6	0.99298	0.99649	0.72632	0.0035088
0.6	0.99479	0.9974	0.95052	0.0078125
0.6	0.9974	0.99219	0.45313	0.0026042
0.6	0.99642	0.99821	0.11807	0.0017889
0.6	1	1	0.98927	0.0053667
0.6	0.99652	0.97561	0.24042	0.02439
0.6	0.98077	0.94712	0.75481	0.043269
0.6	0.97581	0.91935	0.66935	0.020161
0.7	0.95	0.79	0.49	0.2
0.7	0.9	0.68	0.36	0.12
0.7	0.85	0.58	0.26	0.08
0.7	0.8	0.51	0.21	0.06
0.7	0.99688	0.98754	0.93458	0.76636
0.7	1	0.99298	0.94737	0
0.7	0.9974	0.9974	0.99479	0.028646
0.7	0.9974	0.9974	0.79948	0.0052083
0.7	0.99652	0.98955	0.38676	0.062718
0.7	0.98558	0.96154	0.84135	0.076923
0.7	0.98387	0.95565	0.77419	0.040323
0.8	0.3512	0.2071	0.2679	0.1738
0.8	0.672	0.1746	0.1323	0.0212
0.8	0.4832	0.2605	0.2017	0.0546
0.8	0.2033	0.2418	0.3736	0.1813
0.8	0.0693	0.1515	0.3636	0.4156
0.8	0.3854	0.2	0.2333	0.1813
0.8	0.3056	0.2167	0.3139	0.1639
0.8	0.97	0.83	0.55	0.25
0.8	0.92	0.73	0.41	0.16
0.8	0.88	0.64	0.31	0.09
0.8	0.84	0.57	0.27	0.08
0.8	1	0.99065	0.96573	0.85047
0.8	0.99649	1	0.99298	0.014035
0.8	0.9974	1	0.9974	0.14583
0.8	0.99479	0.9974	0.96094	0.0078125
0.8	0.99038	0.97596	0.89423	0.125
0.8	0.9879	0.96774	0.84677	0.076613
0.9	0.98	0.87	0.61	0.3
0.9	0.94	0.78	0.47	0.19
0.9	0.91	0.69	0.37	0.12
0.9	0.87	0.63	0.31	0.1
0.9	1	0.99377	0.98442	0.90966
0.9	0.99649	1	0.99298	0.10175
0.9	0.9974	0.9974	0.99479	0.39583
0.9	0.9974	0.99479	0.98958	0.023438
0.9	0.99463	0.99642	0.91771	0.0017889
0.9	0.99821	0.99821	0.99642	0.16458
0.9	0.99519	0.98558	0.92788	0.17308
0.9	0.99597	0.97581	0.89113	0.1129
1	0.2	0.2167	0.3167	0.2667
1	0.4339	0.3016	0.2063	0.0582
1	0.2815	0.3109	0.3067	0.1008
1	0.0769	0.1758	0.4011	0.3462
1	0.0216	0.0823	0.3506	0.5455
1	0.2146	0.2354	0.2917	0.2583
1	0.1806	0.1917	0.35	0.2778
1	0.98	0.89	0.65	0.35
1	0.95	0.82	0.52	0.22
1	0.92	0.73	0.42	0.15
1	0.9	0.67	0.36	0.12
1	0.99649	0.99649	0.99298	0.29123
1	0.9974	0.9974	0.99479	0.66406
1	0.9974	0.99219	0.99219	0.085938
1	0.99519	0.99038	0.94712	0.24038
1	1	0.9879	0.92742	0.16532
1.1	0.99649	1	0.99649	0.53684
1.1	0.9974	0.9974	0.99479	0.85938
1.1	0.99219	0.99219	0.99479	0.22917
1.1	0.99519	0.98558	0.95673	0.29327
1.1	1	0.9879	0.94355	0.21371
1.2	0.1036	0.1952	0.3333	0.3679
1.2	0.2222	0.3651	0.3069	0.1058
1.2	0.1513	0.2773	0.3866	0.1849
1.2	0.033	0.1154	0.3736	0.478
1.2	0.013	0.0346	0.2684	0.684
1.2	0.1125	0.2271	0.3229	0.3375
1.2	0.0917	0.1528	0.3472	0.4083
1.2	0.99649	1	0.99649	0.73684
1.2	0.9974	0.99479	0.9974	0.95052
1.2	0.99479	0.99219	0.9974	0.44531
1.2	0.99642	0.99642	0.99642	0.10018
1.2	0.99463	1	0.99642	0.81038
1.2	0.99519	0.98558	0.97115	0.36058
1.2	1	0.99194	0.95968	0.27016
