# Supplementary material for: Review article: Review of fragility analyses for major building types in China with new implications for intensity–PGA relation development
Source: Copernicus journal article supplement (doi:10.5194/nhess-20-643-2020), 2020-02-27
Supplement: Supplementary file 3 [file nhess-20-643-2020-supplement.zip › supplements_20190528/data_Fig3-4/RC_B_Intensity_fragility.txt]

Intensity	LS1	LS2	LS3	LS4
6	0.1	0	0	0
6	0.1493	0.021	0	0
6	0.05	0	0	0
6	0	0	0	0
6	0.05	0	0	0
6	0.05	0	0	0
7	0.15	0.01	0	0
7	0.4127	0.0694	0	0
7	0.15	0.02	0	0
7	0.05	0	0	0
7	0.15	0.02	0	0
7	0.1	0	0	0
8	0.3	0.05	0	0
8	0.74	0.31	0.05	0
8	0.5	0.07	0.01	0
8	0.45	0.03	0	0
8	0.5	0.07	0.01	0
8	0.2	0.05	0	0
9	0.5	0.185	0.04	0.005
9	0.81	0.53	0.22	0.04
9	0.85	0.33	0.02	0
9	0.75	0.41	0.16	0.02
9	0.45	0.095	0.01	0
10	0.8	0.5	0.15	0.045
10	0.98	0.91	0.65	0.2
10	0.95	0.67	0.27	0.05
10	0.98	0.91	0.65	0.2
10	0.7	0.35	0.08	0.025
