# Supplementary material for: Review article: Review of fragility analyses for major building types in China with new implications for intensity–PGA relation development
Source: Copernicus journal article supplement (doi:10.5194/nhess-20-643-2020), 2020-02-27
Supplement: Supplementary file 3 [file nhess-20-643-2020-supplement.zip › supplements_20190528/data_Fig3-4/RC_B_PGA(g)_fragility.txt]

int_type	LS1	LS2	LS3	LS4
0.1	0.05	0.015	0.004	0.001
0.1	0.037	0.01	0.001	0.001
0.1	0.028	0.004	0.002	0.001
0.1	0.0091185	0.0030395	0.006079	0.0030395
0.1	0	0	0	0
0.1	0.66202	0	0.0034843	0.0034843
0.1	0.023569	0.003367	0	0.003367
0.1	0.011204	0.0056022	0.011204	0.0084034
0.1	0.006689	0.006689	0.006689	0.006689
0.2	0.21	0.05	0.009	0.001
0.2	0.17	0.03	0.002	0.002
0.2	0.13	0.03	0.007	0.002
0.2	0.17629	0.030395	0.0091185	0.006079
0.2	0.89474	0.038596	0	0
0.2	0.98955	0.13937	0.0034843	0.0034843
0.2	0.3367	0.14815	0.013468	0.010101
0.2	0.15406	0.05042	0.014006	0.011204
0.2	0.040134	0.006689	0.0033445	0.006689
0.3	0.37	0.13	0.03	0.01
0.3	0.31	0.09	0.02	0.003
0.3	0.27	0.07	0.01	0.005
0.3	0.49848	0.17325	0.021277	0.006079
0.3	0.99298	0.78596	0	0
0.3	0.99747	0.79241	0.0050633	0
0.3	0.99241	0.55949	0.0050633	0.0025316
0.3	0.99652	0.57491	0.0034843	0.0034843
0.3	0.6633	0.44444	0.12121	0.006734
0.3	0.40336	0.21569	0.036415	0.0084034
0.3	0.1806	0.06689	0.010033	0.006689
0.4	0.51	0.22	0.06	0.01
0.4	0.45	0.17	0.04	0.01
0.4	0.39	0.13	0.03	0.01
0.4	0.72948	0.37082	0.091185	0.015198
0.4	0.99649	0.99649	0	0
0.4	1	0.87456	0.017422	0.0034843
0.4	0.83838	0.65657	0.29293	0.006734
0.4	0.64706	0.42857	0.12605	0.014006
0.4	0.37458	0.18729	0.033445	0.006689
0.5	0.61	0.3	0.09	0.02
0.5	0.55	0.24	0.06	0.01
0.5	0.49	0.2	0.05	0.01
0.5	0.86322	0.56535	0.19453	0.045593
0.5	0.99298	0.99649	0.024561	0
0.5	0.99652	0.96864	0.076655	0.0069686
0.5	0.92929	0.81481	0.47138	0.010101
0.5	0.79272	0.60504	0.2493	0.016807
0.5	0.55518	0.3311	0.080268	0.006689
0.6	0.7	0.38	0.13	0.02
0.6	0.64	0.32	0.1	0.02
0.6	0.58	0.27	0.07	0.02
0.6	0.93313	0.71429	0.31915	0.1003
0.6	0.99298	0.99298	0.22456	0
0.6	0.99747	0.99494	0.24304	0.0025316
0.6	0.99494	0.99747	0.091139	0.0050633
0.6	1	0.98955	0.19861	0.02439
0.6	0.96633	0.89562	0.6229	0.013468
0.6	0.89076	0.7479	0.37535	0.016807
0.6	0.69231	0.48161	0.1505	0.006689
0.7	0.76	0.45	0.18	0.04
0.7	0.71	0.39	0.13	0.03
0.7	0.65	0.33	0.1	0.02
0.7	0.96657	0.81459	0.45289	0.17325
0.7	0.99298	0.99649	0.60702	0
0.7	0.99652	0.99652	0.36585	0.062718
0.7	0.9899	0.94613	0.73737	0.03367
0.7	0.92997	0.82913	0.5014	0.019608
0.7	0.79264	0.6087	0.24415	0.006689
0.8	0.81	0.51	0.21	0.06
0.8	0.76	0.45	0.17	0.04
0.8	0.71	0.39	0.13	0.03
0.8	0.9848	0.8845	0.56839	0.25532
0.8	0.99649	0.99649	0.87368	0
0.8	0.9899	0.96296	0.82155	0.060606
0.8	0.96078	0.89916	0.61064	0.022409
0.8	0.86288	0.70234	0.34114	0.006689
0.9	0.84	0.57	0.26	0.07
0.9	0.8	0.5	0.21	0.05
0.9	0.75	0.45	0.17	0.04
0.9	0.99392	0.92705	0.66565	0.34954
0.9	0.99649	0.99649	0.97544	0
0.9	0.99747	0.99747	0.97215	0.0025316
0.9	0.99747	0.99747	0.90633	0.0075949
0.9	0.99663	0.9697	0.87879	0.087542
0.9	0.98599	0.92997	0.70308	0.02521
0.9	0.91639	0.78261	0.42809	0.010033
1	0.87	0.62	0.31	0.09
1	0.83	0.56	0.24	0.06
1	0.79	0.49	0.2	0.05
1	1	1	0.99298	0.024561
1	0.99663	0.97643	0.90909	0.13468
1	0.9972	0.95518	0.77031	0.042017
1	0.9398	0.83278	0.51505	0.010033
1.1	1	1	0.99649	0.098246
1.1	0.99663	0.9798	0.94276	0.18182
1.1	0.9972	0.96359	0.83193	0.056022
1.1	0.96321	0.88294	0.59532	0.016722
1.2	0.99649	1	0.99649	0.23509
1.2	0.99747	0.99747	0.99747	0.2481
1.2	0.99241	0.99747	0.99747	0.24557
1.2	1	0.9798	0.95623	0.22896
1.2	1	0.97199	0.86835	0.081232
1.2	0.97659	0.9097	0.65552	0.023411
